# Supplementary material for: Robot Arm Grasping Using Learning-Based Template Matching and Self-Rotation Learning Network
Source: Research Square preprint supplement (doi:10.21203/rs.3.rs-1402918/v1), 2022-03-08
Supplement: Supplementary file 1 [file 01c775ed8d0ab6b7352d7c51.xlsx]

## Sheet: 00_OrBbx_Grasping2400_OneObject
The Experimental Results of The Proposed Method on Rotation Dataset
No.	Search_Name	Template	CenterX	CenterY	Width	Height	Angle	IoU	Angle Error	Grasping Result	Timing
1	00_img0.jpg	Shampoo	365	560	448	170	-61.6393	0.797849	0.931366	Success	0.165125
2	00_img1.jpg	PurpleMedicine	370	483	300	146	-29.7393	0.853815	0.391485	Success	0.0910356
3	00_img10.jpg	O2	525	463	438	184	-19.2258	0.87422	1.89899	Success	0.136996
4	00_img100.jpg	LaptopClean	781	387	442	174	-55.7848	0.673649	2.81921	Success	0.158001
5	00_img101.jpg	GreenSoap	577	541	396	274	69.0133	0.783527	0.440109	Success	0.116005
6	00_img102.jpg	Glue	285	381	488	230	-60.563	0.633102	2.80703	Success	0.161999
7	00_img103.jpg	Glue	365	493	488	230	-38.8746	0.891125	0.809597	Success	0.125001
8	00_img104.jpg	FruitKnife	749	655	440	256	79.003	0.683104	1.59704	Success	0.218001
9	00_img105.jpg	PaperKnife	909	352	532	146	-61.8836	0.81008	1.93106	Success	0.165999
10	00_img106.jpg	Xisat	861	413	526	144	-41.7614	0.979629	0.347801	Success	0.165516
11	00_img107.jpg	Xisat	701	335	526	144	-67.4581	0.892795	1.22245	Success	0.141014
12	00_img108.jpg	Yogurt	685	621	478	196	-37.2034	0.923819	0.0867767	Success	0.180996
13	00_img109.jpg	Yogurt	653	397	478	196	-29.69	0.866233	0.59693	Success	0.133999
14	00_img11.jpg	Block	499	509	278	120	-48.0206	0.967068	1.17495	Success	0.164997
15	00_img110.jpg	O2	429	561	438	184	-63.1379	0.967748	0.619026	Success	0.186522
16	00_img111.jpg	Shampoo	784	415	448	170	-64.5505	0.874305	0.410362	Success	0.172513
17	00_img112.jpg	Shampoo	525	669	448	170	-15.1806	0.892063	1.59044	Success	0.109004
18	00_img113.jpg	SmallMedicine	563	525	260	158	-65.3277	0.825573	0.940155	Success	0.110999
19	00_img114.jpg	Glue	701	557	488	230	-37.9317	0.945862	0.931549	Success	0.103643
20	00_img115.jpg	HandClean	989	685	392	214	51.6787	0.756235	0.14706	Success	0.11
21	00_img116.jpg	GreenGlue	627	445	494	106	-78.0986	0.8307	2.59069	Success	0.109999
22	00_img117.jpg	ABBottle	737	365	474	186	-79.4834	0.685499	1.96985	Success	0.127318
23	00_img118.jpg	PaperKnife	701	477	532	146	-38.6328	0.71726	0.967049	Success	0.106999
24	00_img119.jpg	Yogurt	656	461	478	196	-53.285	0.92789	1.7619	Success	0.123999
25	00_img12.jpg	T1	445	541	432	114	-18.11	0.89541	2.85328	Success	0.0759718
26	00_img120.jpg	FruitKnife	733	397	440	256	76.7805	0.71566	0.037323	Success	0.17716
27	00_img121.jpg	T1	413	461	432	114	-47.3654	0.666869	0.590889	Success	0.0789983
28	00_img122.jpg	FruitKnife	862	349	440	256	72.0163	0.925308	0.838348	Success	0.154976
29	00_img123.jpg	Yogurt	461	477	478	196	-27.0328	0.841955	0.695185	Success	0.0790002
30	00_img124.jpg	Pepper	653	573	366	156	-17.3537	0.747961	2.26669	Success	0.0650322
31	00_img125.jpg	RedMedicine	355	559	324	142	-76.7423	0.92266	1.59602	Success	0.0669742
32	00_img126.jpg	PurpleMedicine	781	590	300	146	-17.8455	0.919044	1.11007	Success	0.0800011
33	00_img127.jpg	ABBottle	669	413	474	186	-76.6372	0.680436	1.61285	Success	0.113978
34	00_img128.jpg	HandClean	445	381	392	214	-29.8821	0.846389	0.455978	Success	0.119001
35	00_img129.jpg	LaptopClean	866	365	442	174	-4.65804	0.847532	1.54029	Success	0.0850005
36	00_img13.jpg	ABBottle	509	493	474	186	-58.0478	0.901634	0.455711	Success	0.103354
37	00_img130.jpg	Shampoo	685	417	448	170	-55.6765	0.734266	2.75938	Success	0.103998
38	00_img131.jpg	PaperKnife	381	525	532	146	-46.6482	0.804936	6.38811	Success	0.128003
39	00_img132.jpg	T1	525	381	432	114	-71.6188	0.913004	1.68936	Success	0.0769963
40	00_img133.jpg	HandClean	397	483	392	214	-27.6389	0.959872	2.03275	Success	0.131999
41	00_img134.jpg	Xisat	669	367	526	144	-58.692	0.92961	1.62533	Success	0.167001
42	00_img135.jpg	FruitKnife	591	447	440	256	74.5178	0.853927	0.601067	Success	0.183
43	00_img136.jpg	GreenSoap	765	386	396	274	64.1026	0.751932	0.606384	Success	0.127997
44	00_img137.jpg	GreenGlue	383	477	494	106	-46.3529	0.47251	4.91194	Success	0.112005
45	00_img138.jpg	Yogurt	482	606	478	196	-65.5704	0.652266	4.12337	Success	0.0940132
46	00_img139.jpg	Xisat	621	461	526	144	-35.4241	0.913579	1.48707	Success	0.0859997
47	00_img14.jpg	O2	429	541	438	184	-11.169	0.942696	0.852391	Success	0.0749991
48	00_img140.jpg	ABBottle	593	525	474	186	-46.1416	0.936992	0.916405	Success	0.0839989
49	00_img141.jpg	ABBottle	576	461	474	186	-63.0737	0.76446	0.450924	Success	0.0900009
50	00_img142.jpg	Yogurt	669	446	478	196	-73.013	0.63663	2.82587	Success	0.129038
51	00_img143.jpg	MilkBottle	448	525	532	238	-48.6948	0.893406	0.714252	Success	0.154008
52	00_img144.jpg	RedMedicine	573	413	324	142	-69.4425	0.963001	0.216759	Success	0.114001
53	00_img145.jpg	SmallMedicine	413	478	260	158	14.0717	0.899218	3.14766	Success	0.0659993
54	00_img146.jpg	Shampoo	701	497	448	170	-0.745723	0.940208	0.402083	Success	0.0740013
55	00_img147.jpg	Xisat	637	525	526	144	-29.9578	0.46746	1.22216	Success	0.130073
56	00_img148.jpg	O2	461	541	438	184	-81.1103	0.933776	0.227882	Success	0.0913825
57	00_img149.jpg	GreenSoap	675	525	396	274	25.2069	0.836867	1.50136	Success	0.116002
58	00_img15.jpg	RedMedicine	979	286	324	142	81.0465	0.897222	0.240089	Success	0.0739999
59	00_img150.jpg	GreenGlue	766	493	494	106	-61.6803	0.541974	5.03352	Success	0.103001
60	00_img151.jpg	Shampoo	445	541	448	170	-20.2881	0.966943	0.874968	Success	0.100974
61	00_img152.jpg	Glue	573	621	488	230	-43.4838	0.759409	5.74368	Success	0.147996
62	00_img153.jpg	GreenSoap	461	365	396	274	-20.4866	0.973768	0.43936	Success	0.088974
63	00_img154.jpg	Glue	541	445	488	230	-28.5519	0.936668	0.645334	Success	0.0909991
64	00_img155.jpg	CokeBottle	829	397	576	202	-37.6063	0.875213	0.29266	Success	0.117
65	00_img156.jpg	PurpleMedicine	445	576	300	146	82.1145	0.665048	1.51172	Success	0.100003
66	00_img157.jpg	Block	370	317	278	120	-44.5829	0.723175	2.15418	Success	0.078002
67	00_img158.jpg	MilkBottle	413	493	532	238	-48.1102	0.938394	0.614487	Success	0.127999
68	00_img159.jpg	Yogurt	733	448	478	196	-58.5074	0.770731	0.767426	Success	0.108978
69	00_img16.jpg	LaptopClean	1025	349	442	174	84.2906	0.950796	0.43502	Success	0.123996
70	00_img160.jpg	CokeBottle	509	589	576	202	-31.8132	0.822856	7.48583	Success	0.106001
71	00_img161.jpg	Glue	285	558	488	230	-68.2558	0.533568	1.08834	Success	0.137016
72	00_img162.jpg	GreenSoap	833	317	396	274	51.0639	0.835768	7.3698	Success	0.128
73	00_img163.jpg	RedMedicine	621	413	324	142	-76.2449	0.749403	1.15672	Success	0.087002
74	00_img164.jpg	GreenSoap	403	477	396	274	-33.2389	0.934163	3.41939	Success	0.119006
75	00_img165.jpg	GreenSoap	498	607	396	274	59.1101	0.816376	7.52338	Success	0.131997
76	00_img166.jpg	FruitKnife	589	431	440	256	-70.1326	0.741982	2.95058	Success	0.153997
77	00_img167.jpg	LaptopClean	365	477	442	174	-49.9513	0.750252	0.976273	Success	0.134997
78	00_img168.jpg	T1	435	589	432	114	82.8349	0.595756	1.92922	Success	0.0889966
79	00_img169.jpg	Yogurt	605	397	478	196	-46.6588	0.834195	1.04616	Success	0.131
80	00_img17.jpg	RedMedicine	493	350	324	142	-49.0123	0.903523	0.216148	Success	0.0819964
81	00_img170.jpg	GreenGlue	493	461	494	106	-62.2433	0.571848	5.33173	Success	0.0839963
82	00_img171.jpg	Pepper	685	285	366	156	6.83908	0.972284	0.67782	Success	0.0890007
83	00_img172.jpg	ABBottle	605	525	474	186	-70.6766	0.664119	0.39975	Success	0.108997
84	00_img173.jpg	FruitKnife	557	621	440	256	7.0491	0.778122	9.80186	Success	0.131973
85	00_img174.jpg	LaptopClean	493	605	442	174	-16.3349	0.728276	0.795593	Success	0.0729992
86	00_img175.jpg	Pepper	909	611	366	156	-71.0987	0.744256	2.14571	Success	0.115001
87	00_img176.jpg	RedMedicine	575	541	324	142	-41.6738	0.947477	0.188206	Success	0.103002
88	00_img177.jpg	Block	803	418	278	120	-45.3907	0.757672	0.393249	Success	0.0889997
89	00_img178.jpg	PaperKnife	480	432	532	146	-25.2475	0.722196	0.257118	Success	0.132982
90	00_img179.jpg	Pepper	477	450	366	156	82.6314	0.905341	0.448013	Success	0.0910013
91	00_img18.jpg	T1	434	605	432	114	-36.438	0.829247	0.528202	Success	0.0879965
92	00_img180.jpg	O2	350	621	438	184	-30.6813	0.974423	0.25613	Success	0.108997
93	00_img181.jpg	O2	511	413	438	184	-43.6526	0.85257	0.951767	Success	0.0985203
94	00_img182.jpg	PurpleMedicine	883	397	300	146	-66.2264	0.83604	3.67297	Success	0.101349
95	00_img183.jpg	O2	653	337	438	184	-66.7495	0.928068	0.275467	Success	0.111999
96	00_img184.jpg	O2	736	509	438	184	82.5708	0.933845	0.251846	Success	0.120007
97	00_img185.jpg	PurpleMedicine	765	338	300	146	-20.8907	0.867034	0.979286	Success	0.0909984
98	00_img186.jpg	O2	301	576	438	184	-67.2178	0.940422	1.51368	Success	0.136002
99	00_img187.jpg	Glue	509	381	488	230	-65.3385	0.680918	6.02868	Success	0.133999
100	00_img188.jpg	ABBottle	573	478	474	186	-50.2427	0.947825	1.36927	Success	0.139999
101	00_img189.jpg	Xisat	445	509	526	144	-39.8979	0.802314	0.658344	Success	0.122004
102	00_img19.jpg	Yogurt	701	413	478	196	-72.7465	0.633791	1.25027	Success	0.103002
103	00_img190.jpg	O2	813	414	438	184	-78.6033	0.594688	2.42734	Success	0.116
104	00_img191.jpg	O2	381	589	438	184	82.8839	0.787214	0.186775	Success	0.123998
105	00_img192.jpg	Glue	478	461	488	230	-28.3527	0.8187	1.44665	Success	0.108972
106	00_img193.jpg	GreenGlue	669	381	494	106	-74.7402	0.764711	6.01514	Success	0.116999
107	00_img194.jpg	MilkBottle	653	525	532	238	-48.053	0.991288	0.112526	Success	0.155996
108	00_img195.jpg	PaperKnife	781	333	532	146	-67.0907	0.922809	0.156761	Success	0.153996
109	00_img196.jpg	Shampoo	653	415	448	170	-69.3988	0.717956	0.649223	Success	0.103998
110	00_img197.jpg	LaptopClean	285	365	442	174	-62.9022	0.480783	2.80921	Success	0.124005
111	00_img198.jpg	Xisat	477	557	526	144	-29.9052	0.819889	4.05021	Success	0.108014
112	00_img199.jpg	LaptopClean	557	509	442	174	-39.2524	0.859597	0.665421	Success	0.118002
113	00_img2.jpg	T1	573	624	432	114	-36.5395	0.61213	3.23954	Success	0.0759997
114	00_img20.jpg	RedMedicine	285	531	324	142	-38.2267	0.978961	0.346058	Success	0.0979996
115	00_img200.jpg	Xisat	735	525	526	144	-32.954	0.551082	1.10309	Success	0.122998
116	00_img201.jpg	ABBottle	589	509	474	186	80.5063	0.614103	2.62711	Success	0.092993
117	00_img202.jpg	Pepper	527	513	366	156	-40.8653	0.644591	0.771187	Success	0.193997
118	00_img203.jpg	FruitKnife	813	621	440	256	22.6679	0.856655	7.87429	Success	0.222
119	00_img204.jpg	Yogurt	589	477	478	196	-65.0407	0.625151	0.857819	Success	0.197002
120	00_img205.jpg	GreenGlue	893	429	494	106	-59.3685	0.614763	2.74932	Success	0.165001
121	00_img206.jpg	Shampoo	733	445	448	170	-78.4694	0.659475	0.229355	Success	0.180998
122	00_img207.jpg	Block	400	512	278	120	-57.8566	0.833144	3.83955	Success	0.173
123	00_img208.jpg	Xisat	621	445	526	144	-47.1764	0.820196	0.210434	Success	0.201003
124	00_img209.jpg	Block	605	317	278	120	-39.351	0.738096	0.974495	Success	0.0999985
125	00_img21.jpg	Xisat	525	525	526	144	-62.1593	0.506933	1.44163	Success	0.134003
126	00_img210.jpg	RedMedicine	701	449	324	142	-23.0026	0.94282	2.32046	Success	0.114003
127	00_img211.jpg	FruitKnife	765	653	440	256	20.0614	0.807911	9.26677	Success	0.237997
128	00_img212.jpg	CokeBottle	529	609	576	202	-30.3577	0.808981	6.09132	Success	0.183998
129	00_img213.jpg	Pepper	621	482	366	156	-5.12293	0.846943	2.46266	Success	0.0919988
130	00_img214.jpg	Glue	925	541	488	230	-61.1757	0.844136	3.14767	Success	0.206
131	00_img215.jpg	RedMedicine	237	547	324	142	-72.788	0.939068	2.74055	Success	0.110998
132	00_img216.jpg	Pepper	514	477	366	156	-52.3833	0.69193	0.961552	Success	0.101516
133	00_img217.jpg	SoftWash	685	451	390	264	-61.3129	0.939312	0.700458	Success	0.185345
134	00_img218.jpg	PaperKnife	541	557	532	146	-43.5241	0.892281	2.76623	Success	0.109038
135	00_img219.jpg	Pepper	365	413	366	156	-79.6127	0.80746	2.99359	Success	0.107038
136	00_img22.jpg	Yogurt	733	464	478	196	-63.4189	0.867821	1.66821	Success	0.125
137	00_img220.jpg	O2	496	461	438	184	-72.195	0.897484	4.17957	Success	0.132
138	00_img221.jpg	O2	525	445	438	184	-21.7098	0.92246	0.640915	Success	0.0839958
139	00_img222.jpg	RedMedicine	306	531	324	142	-72.7621	0.932195	1.69666	Success	0.0970023
140	00_img223.jpg	GreenGlue	541	541	494	106	-31.8474	0.677744	1.16663	Success	0.092
141	00_img224.jpg	ABBottle	573	430	474	186	-32.6977	0.955698	0.700945	Success	0.112005
142	00_img225.jpg	Glue	397	509	488	230	-31.7163	0.970731	0.395304	Success	0.111002
143	00_img226.jpg	Block	819	451	278	120	-42.0888	0.928781	1.29794	Success	0.130001
144	00_img227.jpg	O2	833	509	438	184	-65.9826	0.893682	4.3623	Success	0.133523
145	00_img228.jpg	Shampoo	733	317	448	170	-63.7364	0.75799	0.687016	Success	0.0956376
146	00_img229.jpg	O2	541	461	438	184	-50.0073	0.704926	0.938477	Success	0.114996
147	00_img23.jpg	RedMedicine	291	579	324	142	-63.5548	0.875926	0.524929	Success	0.082
148	00_img230.jpg	RedMedicine	419	429	324	142	-77.2409	0.832726	1.05518	Success	0.086004
149	00_img231.jpg	SoftWash	589	541	390	264	-31.7022	0.940014	3.04553	Success	0.171994
150	00_img232.jpg	PaperKnife	429	259	532	146	-15.3304	0.800547	0.0659514	Success	0.125
151	00_img233.jpg	Glue	797	560	488	230	-13.5483	0.602119	2.04719	Success	0.143001
152	00_img234.jpg	T1	450	477	432	114	-44.175	0.615147	1.21376	Success	0.101
153	00_img235.jpg	FruitKnife	706	461	440	256	-80.3015	0.905265	0.302132	Success	0.193003
154	00_img236.jpg	RedMedicine	621	605	324	142	-34.6083	0.922214	0.329761	Success	0.107999
155	00_img237.jpg	Yogurt	445	525	478	196	-17.2035	0.873659	2.20455	Success	0.102998
156	00_img238.jpg	PurpleMedicine	387	606	300	146	-19.0432	0.952709	1.3179	Success	0.0729799
157	00_img239.jpg	Xisat	381	637	526	144	82.9362	0.619276	1.63947	Success	0.148015
158	00_img24.jpg	Xisat	494	381	526	144	-46.4914	0.829506	0.0490799	Success	0.131003
159	00_img240.jpg	RedMedicine	642	577	324	142	-65.4569	0.94493	0.550514	Success	0.107004
160	00_img241.jpg	Shampoo	562	557	448	170	-6.72027	0.92829	1.82234	Success	0.108001
161	00_img242.jpg	SmallMedicine	483	445	260	158	-64.1443	0.814032	0.153946	Success	0.128998
162	00_img243.jpg	SmallMedicine	589	365	260	158	-64.3455	0.836941	1.30326	Success	0.0989997
163	00_img244.jpg	PaperKnife	461	669	532	146	-14.0807	0.780344	3.29691	Success	0.138001
164	00_img245.jpg	CokeBottle	893	429	576	202	81.2244	0.788016	0.756554	Success	0.155998
165	00_img246.jpg	FruitKnife	797	435	440	256	-79.1711	0.668343	0.203117	Success	0.233024
166	00_img247.jpg	FruitKnife	674	542	440	256	77.3504	0.778836	1.44483	Success	0.268005
167	00_img248.jpg	PaperKnife	637	365	532	146	-81.7791	0.561635	3.9286	Success	0.194004
168	00_img249.jpg	GreenGlue	541	445	494	106	-42.6361	0.591525	1.12419	Success	0.103978
169	00_img25.jpg	RedMedicine	573	541	324	142	-32.3614	0.918653	1.05252	Success	0.0979977
170	00_img250.jpg	O2	895	445	438	184	-56.477	0.826287	1.77129	Success	0.193008
171	00_img251.jpg	FruitKnife	573	461	440	256	-16.8965	0.843587	9.6218	Success	0.187002
172	00_img252.jpg	RedMedicine	323	627	324	142	81.5039	0.783907	1.02323	Success	0.0910006
173	00_img253.jpg	PaperKnife	557	397	532	146	-66.1374	0.857491	1.20347	Success	0.103998
174	00_img254.jpg	LaptopClean	605	461	442	174	-19.4456	0.811426	2.72085	Success	0.0899997
175	00_img255.jpg	Pepper	371	557	366	156	81.8244	0.837767	0.304092	Success	0.085005
176	00_img256.jpg	Block	766	445	278	120	64.4309	0.849065	8.39233e-05	Success	0.0969999
177	00_img257.jpg	Shampoo	771	413	448	170	-60.7661	0.675398	1.12791	Success	0.134846
178	00_img258.jpg	CokeBottle	397	509	576	202	-73.2134	0.656843	0.640892	Success	0.124528
179	00_img259.jpg	O2	381	413	438	184	-6.85429	0.898389	2.4561	Success	0.101996
180	00_img26.jpg	Xisat	413	562	526	144	-28.8453	0.509729	3.84456	Success	0.160998
181	00_img260.jpg	Shampoo	269	557	448	170	84.5846	0.7818	0.591034	Success	0.119116
182	00_img261.jpg	O2	845	477	438	184	-55.5942	0.847037	1.05806	Success	0.166995
183	00_img262.jpg	T1	397	623	432	114	-21.6432	0.795852	2.95754	Success	0.129
184	00_img263.jpg	O2	669	526	438	184	-44.1086	0.963759	0.662506	Success	0.165003
185	00_img264.jpg	LaptopClean	621	367	442	174	-42.0448	0.882356	1.77647	Success	0.15861
186	00_img265.jpg	Shampoo	605	461	448	170	-0.662933	0.917273	1.54433	Success	0.112
187	00_img266.jpg	O2	830	461	438	184	-35.0067	0.877326	0.178059	Success	0.151996
188	00_img267.jpg	O2	557	334	438	184	-50.2527	0.85231	0.781612	Success	0.139005
189	00_img268.jpg	GreenGlue	640	477	494	106	-58.4423	0.511504	6.27287	Success	0.0869944
190	00_img269.jpg	Shampoo	783	445	448	170	-73.188	0.682458	2.86489	Success	0.132001
191	00_img27.jpg	Yogurt	366	544	478	196	82.0661	0.788583	3.31499	Success	0.129997
192	00_img270.jpg	Shampoo	557	509	448	170	-36.7842	0.831756	1.77477	Success	0.122998
193	00_img271.jpg	PaperKnife	413	653	532	146	-17.2984	0.807458	0.480389	Success	0.0910034
194	00_img272.jpg	O2	653	413	438	184	-64.8885	0.719125	0.651619	Success	0.132934
195	00_img273.jpg	T1	638	397	432	114	-78.551	0.651049	2.05829	Success	0.119003
196	00_img274.jpg	LaptopClean	653	224	442	174	84.3599	0.705492	1.33643	Success	0.136
197	00_img275.jpg	GreenSoap	893	562	396	274	60.4464	0.786174	0.605301	Success	0.134995
198	00_img276.jpg	Xisat	589	349	526	144	-49.512	0.903194	1.2292	Success	0.115002
199	00_img277.jpg	O2	559	461	438	184	-41.9687	0.909098	1.08032	Success	0.112002
200	00_img278.jpg	FruitKnife	765	541	440	256	74.876	0.819941	0.345284	Success	0.16
201	00_img279.jpg	RedMedicine	429	515	324	142	-77.4077	0.726048	0.652573	Success	0.0985165
202	00_img28.jpg	FruitKnife	493	541	440	256	79.881	0.766371	0.433456	Success	0.201012
203	00_img280.jpg	RedMedicine	867	592	324	142	-44.2586	0.934105	0.473259	Success	0.0860023
204	00_img281.jpg	PaperKnife	573	397	532	146	-17.4702	0.785421	0.708996	Success	0.118001
205	00_img282.jpg	RedMedicine	243	445	324	142	-64.6065	0.805987	0.358284	Success	0.105001
206	00_img283.jpg	CokeBottle	493	429	576	202	-79.9746	0.880891	0.967331	Success	0.135997
207	00_img284.jpg	HandClean	290	576	392	214	51.6173	0.661597	0.493603	Success	0.140004
208	00_img285.jpg	ABBottle	400	557	474	186	-17.2339	0.908351	0.260786	Success	0.0729952
209	00_img286.jpg	Yogurt	477	606	478	196	-16.9677	0.898515	1.17897	Success	0.121995
210	00_img287.jpg	ABBottle	509	509	474	186	-43.0116	0.973702	0.0418625	Success	0.126999
211	00_img288.jpg	ABBottle	701	413	474	186	-79.7683	0.673034	3.27261	Success	0.139068
212	00_img289.jpg	PaperKnife	765	494	532	146	-61.4293	0.855307	0.037426	Success	0.110996
213	00_img29.jpg	Block	691	525	278	120	65.971	0.934527	0.572502	Success	0.116025
214	00_img290.jpg	HandClean	253	541	392	214	-34.0568	0.959627	0.11842	Success	0.116975
215	00_img291.jpg	O2	333	541	438	184	-26.8781	0.8236	0.691116	Success	0.105362
216	00_img292.jpg	Shampoo	893	397	448	170	-79.4156	0.982893	0.209892	Success	0.13
217	00_img293.jpg	HandClean	590	429	392	214	-31.543	0.978303	0.671488	Success	0.119998
218	00_img294.jpg	Xisat	749	477	526	144	-42.9166	0.800471	1.59907	Success	0.115283
219	00_img295.jpg	T1	429	541	432	114	-35.4247	0.568126	5.27163	Success	0.0979998
220	00_img296.jpg	LaptopClean	525	368	442	174	-48.7579	0.840835	0.238609	Success	0.134017
221	00_img297.jpg	RedMedicine	531	563	324	142	-68.6407	0.888363	0.0281754	Success	0.102071
222	00_img298.jpg	Pepper	877	256	366	156	-11.1914	0.701663	1.80706	Success	0.0876529
223	00_img299.jpg	Shampoo	462	605	448	170	-30.195	0.807193	2.97187	Success	0.106995
224	00_img3.jpg	Xisat	541	493	526	144	-46.0895	0.877569	0.678856	Success	0.108999
225	00_img30.jpg	O2	973	557	438	184	-77.9865	0.976184	0.934746	Success	0.107001
226	00_img300.jpg	PaperKnife	861	525	532	146	-28.4668	0.835308	1.30611	Success	0.0959952
227	00_img301.jpg	FruitKnife	957	573	440	256	68.1658	0.844903	0.269112	Success	0.16
228	00_img302.jpg	PaperKnife	701	381	532	146	-49.2988	0.908026	1.98138	Success	0.134981
229	00_img303.jpg	O2	797	461	438	184	-70.702	0.543791	0.20533	Success	0.146001
230	00_img304.jpg	Shampoo	386	541	448	170	-24.7792	0.898472	2.11136	Success	0.098
231	00_img305.jpg	Shampoo	621	557	448	170	-29.5416	0.839134	2.78807	Success	0.0980008
232	00_img306.jpg	Shampoo	898	494	448	170	-49.4481	0.909521	0.81662	Success	0.130973
233	00_img307.jpg	O2	672	509	438	184	-23.9212	0.920623	0.601936	Success	0.130002
234	00_img308.jpg	RedMedicine	957	595	324	142	-40.5234	0.927576	0.768696	Success	0.108999
235	00_img309.jpg	HandClean	942	339	392	214	51.9984	0.696156	0.371117	Success	0.116002
236	00_img31.jpg	MilkBottle	461	685	532	238	-49.2433	0.882084	1.39689	Success	0.162001
237	00_img310.jpg	Glue	541	541	488	230	2.36198	0.9069	3.04495	Success	0.0909953
238	00_img311.jpg	LaptopClean	432	493	442	174	-5.79725	0.888172	0.597998	Success	0.0829968
239	00_img312.jpg	T1	493	509	432	114	-38.5611	0.601948	0.731663	Success	0.134998
240	00_img313.jpg	RedMedicine	576	509	324	142	-68.3238	0.879316	0.612213	Success	0.0939953
241	00_img314.jpg	FruitKnife	768	397	440	256	-58.8594	0.95378	0.0585136	Success	0.206036
242	00_img315.jpg	O2	845	414	438	184	-74.6708	0.940343	1.68927	Success	0.121003
243	00_img316.jpg	PurpleMedicine	397	557	300	146	-75.0197	0.770077	4.74459	Success	0.0749977
244	00_img317.jpg	O2	413	445	438	184	-40.3463	0.810287	1.06387	Success	0.131
245	00_img318.jpg	FruitKnife	785	495	440	256	-78.952	0.647906	0.315422	Success	0.162001
246	00_img319.jpg	Xisat	863	429	526	144	-77.903	0.764186	1.70453	Success	0.106976
247	00_img32.jpg	PaperKnife	893	397	532	146	-24.6052	0.743315	1.76898	Success	0.130001
248	00_img320.jpg	LaptopClean	669	365	442	174	-71.1796	0.509542	4.28629	Success	0.112
249	00_img321.jpg	PurpleMedicine	931	541	300	146	-16.7893	0.741354	0.424894	Success	0.0920036
250	00_img322.jpg	HandClean	493	477	392	214	-30.3555	0.908388	0.699461	Success	0.132977
251	00_img323.jpg	ABBottle	466	369	474	186	-61.502	0.803032	1.98695	Success	0.131004
252	00_img324.jpg	T1	466	497	432	114	-42.1696	0.527967	3.07648	Success	0.111001
253	00_img325.jpg	O2	269	627	438	184	82.9342	0.870794	0.574677	Success	0.153996
254	00_img326.jpg	O2	765	477	438	184	-61.7484	0.675185	0.0821419	Success	0.191001
255	00_img327.jpg	LaptopClean	653	625	442	174	-46.3673	0.864079	0.946281	Success	0.182
256	00_img328.jpg	GreenGlue	509	493	494	106	-37.0466	0.616723	0.179501	Success	0.139001
257	00_img329.jpg	Xisat	701	349	526	144	-72.1722	0.526756	2.59961	Success	0.175
258	00_img33.jpg	RedMedicine	867	579	324	142	-12.9053	0.874	5.13963	Success	0.101001
259	00_img330.jpg	SmallMedicine	611	367	260	158	-65.2969	0.849682	0.26313	Success	0.119005
260	00_img331.jpg	Xisat	685	525	526	144	-37.4227	0.53936	1.6772	Success	0.168001
261	00_img332.jpg	LaptopClean	365	301	442	174	-45.5503	0.735375	0.984829	Success	0.171247
262	00_img333.jpg	Block	528	514	278	120	-61.5042	0.745467	0.567635	Success	0.101997
263	00_img334.jpg	Xisat	477	653	526	144	-22.7689	0.624874	4.65619	Success	0.099978
264	00_img335.jpg	LaptopClean	717	493	442	174	-64.4726	0.63411	0.233376	Success	0.111003
265	00_img336.jpg	PaperKnife	477	381	532	146	-29.7002	0.748482	0.243505	Success	0.132997
266	00_img337.jpg	Glue	270	717	488	230	-56.7772	0.444864	7.15926	Success	0.157998
267	00_img338.jpg	O2	765	557	438	184	-54.3903	0.936474	0.809372	Success	0.149995
268	00_img339.jpg	T1	674	546	432	114	-41.8961	0.950765	0.358982	Success	0.0820007
269	00_img34.jpg	ABBottle	445	509	474	186	-73.8367	0.774519	0.0496597	Success	0.12981
270	00_img340.jpg	ABBottle	605	511	474	186	-80.355	0.635108	1.60803	Success	0.144
271	00_img341.jpg	ABBottle	461	397	474	186	-42.2816	0.854313	0.273994	Success	0.130994
272	00_img342.jpg	RedMedicine	995	493	324	142	-37.7939	0.821626	0.104992	Success	0.106999
273	00_img343.jpg	Yogurt	512	605	478	196	-39.014	0.894938	1.51789	Success	0.159003
274	00_img344.jpg	LaptopClean	925	269	442	174	-26.9901	0.750522	0.569496	Success	0.118306
275	00_img345.jpg	HandClean	497	477	392	214	51.701	0.838564	0.0458641	Success	0.133973
276	00_img346.jpg	Shampoo	738	626	448	170	-49.2578	0.887884	1.05264	Success	0.124001
277	00_img347.jpg	CokeBottle	669	477	576	202	-73.6896	0.595827	1.90697	Success	0.138061
278	00_img348.jpg	SoftWash	464	445	390	264	-24.8111	0.963245	1.9278	Success	0.13804
279	00_img349.jpg	PaperKnife	463	461	532	146	-45.4228	0.758162	0.733509	Success	0.131003
280	00_img35.jpg	ABBottle	461	397	474	186	-42.2676	0.92117	1.08664	Success	0.118
281	00_img350.jpg	Glue	589	691	488	230	-70.3088	0.699127	6.92167	Success	0.181049
282	00_img351.jpg	FruitKnife	655	509	440	256	-61.4893	0.826318	3.91224	Success	0.203423
283	00_img352.jpg	RedMedicine	781	573	324	142	-53.7224	0.848494	1.99718	Success	0.0899966
284	00_img353.jpg	GreenGlue	445	606	494	106	-29.8895	0.746075	1.4307	Success	0.100998
285	00_img354.jpg	SmallMedicine	737	547	260	158	-61.5881	0.757759	0.718983	Success	0.0970006
286	00_img355.jpg	SoftWash	478	621	390	264	-19.2478	0.945968	1.75181	Success	0.143994
287	00_img356.jpg	O2	461	509	438	184	-81.0041	0.983091	0.11467	Success	0.12002
288	00_img357.jpg	LaptopClean	845	333	442	174	-68.8746	0.78369	0.300453	Success	0.150011
289	00_img358.jpg	ABBottle	546	573	474	186	-56.0095	0.791367	0.388767	Success	0.136003
290	00_img359.jpg	T1	701	477	432	114	-55.0571	0.604216	1.47087	Success	0.104
291	00_img36.jpg	SmallMedicine	307	642	260	158	49.3014	0.892207	0.289845	Success	0.0929995
292	00_img360.jpg	T1	814	349	432	114	-64.4289	0.654956	1.00319	Success	0.158065
293	00_img361.jpg	Yogurt	653	493	478	196	-3.04845	0.861094	2.14036	Success	0.101964
294	00_img362.jpg	RedMedicine	946	381	324	142	-56.2969	0.919408	1.35094	Success	0.148971
295	00_img363.jpg	LaptopClean	386	429	442	174	-35.0675	0.940003	0.10849	Success	0.117999
296	00_img364.jpg	Pepper	499	450	366	156	-69.7409	0.852021	0.355042	Success	0.122999
297	00_img365.jpg	Xisat	717	397	526	144	-62.9589	0.947561	1.04159	Success	0.161
298	00_img366.jpg	HandClean	429	477	392	214	-29.0683	0.83752	1.51507	Success	0.112232
299	00_img367.jpg	HandClean	525	514	392	214	-29.0706	0.835328	0.524225	Success	0.141999
300	00_img368.jpg	Shampoo	397	461	448	170	83.9538	0.884104	0.0987167	Success	0.141004
301	00_img369.jpg	LaptopClean	688	623	442	174	-51.3669	0.737282	0.652954	Success	0.131002
302	00_img37.jpg	ABBottle	687	513	474	186	-50.6302	0.810395	0.0367165	Success	0.138
303	00_img370.jpg	Pepper	525	461	366	156	-8.34556	0.903214	0.659793	Success	0.0929759
304	00_img371.jpg	Glue	559	477	488	230	-0.806001	0.82529	0.575671	Success	0.105997
305	00_img372.jpg	Shampoo	797	541	448	170	-15.4305	0.752779	0.815345	Success	0.121975
306	00_img373.jpg	ABBottle	413	573	474	186	-22.6322	0.91684	0.0469112	Success	0.117997
307	00_img374.jpg	Xisat	733	382	526	144	-55.8328	0.744065	0.749947	Success	0.159003
308	00_img375.jpg	T1	973	301	432	114	-81.3641	0.810512	0.866409	Success	0.108003
309	00_img376.jpg	Xisat	445	573	526	144	-28.3352	0.882424	2.97693	Success	0.0979977
310	00_img377.jpg	ABBottle	413	557	474	186	-40.0256	0.919429	0.0681992	Success	0.126998
311	00_img378.jpg	PaperKnife	765	365	532	146	-23.7131	0.765821	0.112207	Success	0.110318
312	00_img379.jpg	GreenSoap	717	450	396	274	-60.1181	0.852038	0.400215	Success	0.138004
313	00_img38.jpg	GreenSoap	877	669	396	274	30.4538	0.800295	4.45161	Success	0.105
314	00_img380.jpg	O2	431	461	438	184	-46.1103	0.953382	0.405602	Success	0.123994
315	00_img381.jpg	FruitKnife	781	429	440	256	-80.7747	0.945259	0.266754	Success	0.226003
316	00_img382.jpg	MilkBottle	621	461	532	238	28.2064	0.834835	0.854071	Success	0.145002
317	00_img383.jpg	HandClean	461	525	392	214	53.0316	0.944401	1.14303	Success	0.152005
318	00_img384.jpg	Shampoo	349	605	448	170	-10.9289	0.8534	0.0517025	Success	0.104009
319	00_img385.jpg	LaptopClean	877	480	442	174	-32.863	0.821714	0.227398	Success	0.126974
320	00_img386.jpg	RedMedicine	483	637	324	142	-35.4436	0.986617	0.269035	Success	0.115
321	00_img387.jpg	LaptopClean	621	653	442	174	-12.2943	0.665475	0.393953	Success	0.147002
322	00_img388.jpg	T1	685	525	432	114	-74.9257	0.852481	2.4862	Success	0.148004
323	00_img389.jpg	O2	589	573	438	184	-40.1763	0.821979	0.220581	Success	0.168004
324	00_img39.jpg	CokeBottle	893	525	576	202	81.6534	0.649546	1.25448	Success	0.19298
325	00_img390.jpg	GreenGlue	558	397	494	106	-43.0378	0.528173	2.84771	Success	0.11653
326	00_img391.jpg	CokeBottle	797	557	576	202	-25.1896	0.79787	7.25444	Success	0.114
327	00_img392.jpg	RedMedicine	319	541	324	142	-54.4444	0.943698	0.425289	Success	0.113608
328	00_img393.jpg	RedMedicine	413	557	324	142	-44.0403	0.944286	0.0277252	Success	0.111996
329	00_img394.jpg	RedMedicine	397	461	324	142	-24.3732	0.9456	1.18312	Success	0.0909982
330	00_img395.jpg	T1	445	589	432	114	-17.0456	0.827047	2.90645	Success	0.108968
331	00_img396.jpg	Xisat	861	319	526	144	-53.0737	0.766254	1.61468	Success	0.135
332	00_img397.jpg	PaperKnife	717	493	532	146	-28.3488	0.688057	1.84647	Success	0.146003
333	00_img398.jpg	HandClean	765	307	392	214	-29.1779	0.881954	0.537754	Success	0.126002
334	00_img399.jpg	Pepper	785	333	366	156	-3.5242	0.911272	0.686169	Success	0.0798693
335	00_img4.jpg	ABBottle	541	509	474	186	-46.7878	0.857241	0.349369	Success	0.131998
336	00_img40.jpg	LaptopClean	494	589	442	174	-72.8965	0.53856	3.8407	Success	0.146
337	00_img400.jpg	HandClean	653	608	392	214	-29.4975	0.95887	1.29489	Success	0.102939
338	00_img401.jpg	SmallMedicine	333	605	260	158	-63.145	0.750667	0.640186	Success	0.101997
339	00_img402.jpg	RedMedicine	637	557	324	142	-17.535	0.890396	4.70326	Success	0.0870149
340	00_img403.jpg	RedMedicine	285	605	324	142	81.7466	0.963472	0.209351	Success	0.10312
341	00_img404.jpg	ABBottle	669	461	474	186	-3.14305	0.948903	0.853279	Success	0.111999
342	00_img405.jpg	Xisat	733	461	526	144	-22.1325	0.85539	4.68901	Success	0.117996
343	00_img406.jpg	HandClean	301	573	392	214	-28.6326	0.913192	0.478827	Success	0.146982
344	00_img407.jpg	Pepper	317	429	366	156	-15.6369	0.833642	0.933567	Success	0.116
345	00_img408.jpg	LaptopClean	653	477	442	174	-77.7127	0.709812	1.37624	Success	0.132994
346	00_img409.jpg	ABBottle	573	573	474	186	-43.4016	0.986911	0.385025	Success	0.120977
347	00_img41.jpg	Glue	557	462	488	230	80.6164	0.665042	2.5558	Success	0.134002
348	00_img410.jpg	O2	813	413	438	184	-70.7455	0.515993	0.835716	Success	0.14901
349	00_img411.jpg	RedMedicine	509	275	324	142	-2.60376	0.90898	0.225216	Success	0.0909989
350	00_img412.jpg	RedMedicine	637	573	324	142	-64.9693	0.875458	1.03983	Success	0.0920002
351	00_img413.jpg	Xisat	477	397	526	144	-58.3927	0.565386	0.652904	Success	0.160001
352	00_img414.jpg	LaptopClean	605	446	442	174	-5.63089	0.906657	1.38006	Success	0.127312
353	00_img415.jpg	Yogurt	621	477	478	196	-60.2359	0.878205	0.748295	Success	0.153003
354	00_img416.jpg	PurpleMedicine	941	349	300	146	-16.8234	0.809005	3.33741	Success	0.0732608
355	00_img417.jpg	LaptopClean	493	589	442	174	-58.0209	0.48467	3.39141	Success	0.118998
356	00_img418.jpg	MilkBottle	733	525	532	238	-49.5123	0.932357	1.07543	Success	0.161999
357	00_img419.jpg	Pepper	493	445	366	156	-21.1939	0.752602	0.143328	Success	0.102998
358	00_img42.jpg	LaptopClean	493	525	442	174	-22.0384	0.782027	0.589567	Success	0.134345
359	00_img420.jpg	Shampoo	733	510	448	170	-64.6947	0.697253	0.366226	Success	0.108996
360	00_img421.jpg	PaperKnife	717	429	532	146	-45.0291	0.887746	3.51943	Success	0.143997
361	00_img422.jpg	PurpleMedicine	813	291	300	146	-17.2202	0.936726	0.379822	Success	0.079999
362	00_img423.jpg	FruitKnife	877	525	440	256	-80.5254	0.875958	0.0856476	Success	0.154881
363	00_img424.jpg	O2	672	493	438	184	-44.4047	0.953267	0.553555	Success	0.125997
364	00_img425.jpg	CokeBottle	541	445	576	202	-28.296	0.727205	6.30498	Success	0.120993
365	00_img426.jpg	Block	829	787	278	120	33.2758	0.6812	18.5962	Success	0.0910032
366	00_img427.jpg	Yogurt	653	381	478	196	-37.6635	0.916276	0.864716	Success	0.139001
367	00_img428.jpg	FruitKnife	481	477	440	256	76.3626	0.811	0.163483	Success	0.213001
368	00_img429.jpg	T1	703	419	432	114	-58.0109	0.543193	1.36259	Success	0.125001
369	00_img43.jpg	Xisat	893	397	526	144	1.53327	0.418114	1.46649	Success	0.128994
370	00_img430.jpg	PaperKnife	366	621	532	146	-43.3006	0.82523	4.39026	Success	0.136994
371	00_img431.jpg	FruitKnife	658	477	440	256	-46.9301	0.93881	0.872677	Success	0.174974
372	00_img432.jpg	RedMedicine	530	477	324	142	81.2083	0.805763	0.238968	Success	0.104978
373	00_img433.jpg	Yogurt	445	430	478	196	-35.9439	0.893657	0.542309	Success	0.148999
374	00_img434.jpg	T1	605	543	432	114	-58.6235	0.926103	1.41203	Success	0.111021
375	00_img435.jpg	O2	525	653	438	184	-64.5037	0.57855	2.83135	Success	0.150172
376	00_img436.jpg	Shampoo	701	479	448	170	-12.3069	0.950084	0.442703	Success	0.118006
377	00_img437.jpg	Yogurt	573	541	478	196	-2.25533	0.862305	3.49481	Success	0.177997
378	00_img438.jpg	RedMedicine	349	579	324	142	-41.9503	0.929709	0.416698	Success	0.0899732
379	00_img439.jpg	Shampoo	717	461	448	170	-32.3453	0.894131	2.14179	Success	0.117975
380	00_img44.jpg	HandClean	849	349	392	214	-29.5936	0.783397	0.34148	Success	0.152002
381	00_img440.jpg	GreenGlue	669	461	494	106	-43.1646	0.744622	0.41354	Success	0.0910022
382	00_img441.jpg	T1	494	541	432	114	-38.4745	0.834536	0.574337	Success	0.106
383	00_img442.jpg	ABBottle	542	365	474	186	-50.8811	0.939997	0.0661735	Success	0.147331
384	00_img443.jpg	Xisat	861	349	526	144	-42.9987	0.542925	0.12579	Success	0.155003
385	00_img444.jpg	HandClean	477	381	392	214	-29.3688	0.849197	0.465017	Success	0.157999
386	00_img445.jpg	GreenSoap	367	543	396	274	-17.8401	0.917711	4.73326	Success	0.115999
387	00_img446.jpg	MilkBottle	701	525	532	238	33.065	0.856357	0.72308	Success	0.206991
388	00_img447.jpg	Shampoo	607	525	448	170	-3.42726	0.796946	1.43497	Success	0.114001
389	00_img448.jpg	Xisat	573	525	526	144	-1.19042	0.770955	1.39099	Success	0.148998
390	00_img449.jpg	Glue	817	429	488	230	-71.1282	0.744135	1.13714	Success	0.203
391	00_img45.jpg	T1	351	637	432	114	-40.4408	0.61419	2.20136	Success	0.151
392	00_img450.jpg	Pepper	671	477	366	156	-1.66566	0.892557	0.748007	Success	0.082
393	00_img451.jpg	Yogurt	414	528	478	196	-66.4483	0.824316	0.399239	Success	0.134999
394	00_img452.jpg	Xisat	509	477	526	144	-43.0839	0.937386	1.44981	Success	0.112972
395	00_img453.jpg	Glue	336	544	488	230	-32.7106	0.946461	2.13002	Success	0.132996
396	00_img454.jpg	Block	275	579	278	120	-53.1959	0.774727	5.11185	Success	0.136978
397	00_img455.jpg	HandClean	674	349	392	214	-30.1529	0.849062	0.701572	Success	0.132999
398	00_img456.jpg	RedMedicine	544	483	324	142	-45.357	0.91593	2.6183	Success	0.115986
399	00_img457.jpg	RedMedicine	851	418	324	142	-61.9346	0.983072	0.164036	Success	0.0960004
400	00_img458.jpg	GreenSoap	589	558	396	274	-31.9616	0.97115	0.902845	Success	0.141042
401	00_img459.jpg	HandClean	477	573	392	214	-27.3663	0.948591	0.826134	Success	0.121933
402	00_img46.jpg	T1	637	301	432	114	-22.6175	0.8803	1.72157	Success	0.121001
403	00_img460.jpg	CokeBottle	766	605	576	202	-42.357	0.870941	4.29162	Success	0.134994
404	00_img461.jpg	FruitKnife	815	413	440	256	-77.1134	0.690923	0.0201721	Success	0.199999
405	00_img462.jpg	LaptopClean	383	429	442	174	-48.3686	0.808458	1.33802	Success	0.153003
406	00_img463.jpg	GreenSoap	579	525	396	274	-33.6838	0.95687	0.969685	Success	0.126997
407	00_img464.jpg	SoftWash	307	541	390	264	69.028	0.928739	0.966316	Success	0.176973
408	00_img465.jpg	PaperKnife	753	461	532	146	85.2628	0.778072	1.48277	Success	0.127003
409	00_img466.jpg	Yogurt	637	589	478	196	-31.0605	0.850196	0.214508	Success	0.129996
410	00_img467.jpg	Glue	287	349	488	230	-47.948	0.913084	0.758408	Success	0.199364
411	00_img468.jpg	T1	899	403	432	114	-47.6558	0.733332	2.27899	Success	0.11
412	00_img469.jpg	Shampoo	365	541	448	170	-55.7035	0.937273	2.0501	Success	0.147994
413	00_img47.jpg	Glue	493	445	488	230	-10.0432	0.669953	0.605936	Success	0.152001
414	00_img470.jpg	T1	813	337	432	114	-37.4037	0.526017	1.31603	Success	0.127001
415	00_img471.jpg	O2	589	429	438	184	-38.34	0.917755	0.436687	Success	0.155002
416	00_img472.jpg	ABBottle	509	526	474	186	-45.4559	0.823712	0.155193	Success	0.133971
417	00_img473.jpg	T1	669	447	432	114	-57.5061	0.573236	1.61644	Success	0.109999
418	00_img474.jpg	Block	835	494	278	120	-53.1041	0.746866	2.00977	Success	0.122995
419	00_img475.jpg	ABBottle	722	398	474	186	-78.6458	0.596643	3.02733	Success	0.157928
420	00_img476.jpg	Glue	557	398	488	230	-62.4539	0.684175	6.07542	Success	0.174972
421	00_img477.jpg	DrillCover	605	510	454	148	-0.749649	0.924698	1.02257	Success	0.0979841
422	00_img478.jpg	O2	669	557	438	184	-38.2999	0.959594	0.674362	Success	0.140999
423	00_img479.jpg	Xisat	877	301	526	144	-48.8402	0.852286	0.260155	Success	0.164
424	00_img48.jpg	O2	574	557	438	184	-7.8015	0.918833	3.289	Success	0.0949948
425	00_img480.jpg	PurpleMedicine	989	621	300	146	-1.85372	0.908335	0.0467246	Success	0.105999
426	00_img481.jpg	MilkBottle	605	461	532	238	32.2062	0.814939	0.635111	Success	0.132
427	00_img482.jpg	Pepper	669	493	366	156	-58.1478	0.838412	1.35609	Success	0.119001
428	00_img483.jpg	RedMedicine	339	493	324	142	-28.7775	0.952418	1.18693	Success	0.103999
429	00_img484.jpg	Glue	941	445	488	230	-73.9534	0.709289	0.687599	Success	0.140057
430	00_img485.jpg	DrillCover	509	509	454	148	82.157	0.850944	3.48067	Success	0.113003
431	00_img486.jpg	LaptopClean	781	449	442	174	-33.3532	0.918608	0.638908	Success	0.159002
432	00_img487.jpg	SoftWash	781	445	390	264	55.8865	0.958982	2.03032	Success	0.193034
433	00_img488.jpg	PurpleMedicine	637	451	300	146	-74.7879	0.79428	3.31176	Success	0.127971
434	00_img489.jpg	ABBottle	448	477	474	186	-53.4961	0.761739	0.670666	Success	0.157045
435	00_img49.jpg	Shampoo	605	605	448	170	-13.6891	0.803738	1.45883	Success	0.0819616
436	00_img490.jpg	O2	944	637	438	184	-40.8765	0.867084	0.13028	Success	0.172759
437	00_img491.jpg	T1	447	669	432	114	-11.7133	0.859744	1.07622	Success	0.078999
438	00_img492.jpg	PurpleMedicine	509	387	300	146	-69.7743	0.871063	2.27027	Success	0.0889993
439	00_img493.jpg	FruitKnife	448	510	440	256	-73.0156	0.971064	0.931198	Success	0.216182
440	00_img494.jpg	Xisat	717	382	526	144	-60.6577	0.718776	1.33944	Success	0.12
441	00_img495.jpg	SmallMedicine	623	429	260	158	-65.2083	0.846884	0.598015	Success	0.133869
442	00_img496.jpg	Pepper	386	622	366	156	-16.6318	0.923361	0.443909	Success	0.109002
443	00_img497.jpg	Pepper	303	429	366	156	-55.8459	0.88105	0.334896	Success	0.111995
444	00_img498.jpg	Xisat	701	557	526	144	-30.7925	0.776185	3.01032	Success	0.139
445	00_img499.jpg	LaptopClean	765	365	442	174	-60.9866	0.627579	1.83617	Success	0.186998
446	00_img5.jpg	T1	397	669	432	114	-13.4654	0.842301	0.687964	Success	0.108003
447	00_img50.jpg	Glue	669	413	488	230	-54.8364	0.774535	2.11822	Success	0.174999
448	00_img500.jpg	DrillCover	429	462	454	148	82.6533	0.727416	0.592339	Success	0.123
449	00_img501.jpg	Xisat	349	573	526	144	-49.3262	0.889977	1.87559	Success	0.115
450	00_img502.jpg	GreenGlue	509	557	494	106	-37.9234	0.538798	0.0415153	Success	0.115
451	00_img503.jpg	Yogurt	513	605	478	196	-37.3827	0.933936	1.47922	Success	0.141997
452	00_img504.jpg	Shampoo	445	493	448	170	-15.5448	0.728047	3.79435	Success	0.131
453	00_img505.jpg	RedMedicine	989	401	324	142	-35.0281	0.818947	2.95407	Success	0.183006
454	00_img506.jpg	Glue	225	589	488	230	80.3712	0.607726	9.00442	Success	0.188996
455	00_img507.jpg	CokeBottle	541	589	576	202	-37.7944	0.826526	6.83648	Success	0.207969
456	00_img508.jpg	GreenGlue	542	461	494	106	-48.443	0.581431	2.29917	Success	0.146999
457	00_img509.jpg	SoftWash	419	399	390	264	-29.9033	0.865046	4.61835	Success	0.180005
458	00_img51.jpg	GreenSoap	509	451	396	274	-57.4261	0.928625	0.278004	Success	0.151
459	00_img510.jpg	LaptopClean	574	445	442	174	-40.4206	0.922897	0.671001	Success	0.163999
460	00_img511.jpg	SmallMedicine	461	499	260	158	-62.291	0.761611	2.81817	Success	0.114997
461	00_img512.jpg	CokeBottle	525	397	576	202	81.8493	0.648963	0.64891	Success	0.191002
462	00_img513.jpg	T1	701	541	432	114	-63.6816	0.727647	0.878853	Success	0.116022
463	00_img514.jpg	FruitKnife	656	509	440	256	-71.8214	0.706619	1.07228	Success	0.207001
464	00_img515.jpg	O2	605	478	438	184	-46.2027	0.916857	0.504745	Success	0.159001
465	00_img516.jpg	PurpleMedicine	813	205	300	146	-4.98047	0.791847	1.2296	Success	0.0649989
466	00_img517.jpg	PurpleMedicine	701	254	300	146	-28.3237	0.64234	4.26386	Success	0.109972
467	00_img518.jpg	HandClean	270	637	392	214	53.1154	0.989903	0.265747	Success	0.154003
468	00_img519.jpg	Shampoo	589	509	448	170	-57.867	0.613314	2.7593	Success	0.148002
469	00_img52.jpg	O2	525	541	438	184	-31.302	0.847105	0.338013	Success	0.120002
470	00_img520.jpg	LaptopClean	541	431	442	174	-62.368	0.694141	0.0694466	Success	0.167001
471	00_img521.jpg	FruitKnife	525	349	440	256	-45.2891	0.946192	2.77613	Success	0.141
472	00_img522.jpg	O2	365	573	438	184	-24.2875	0.869483	0.383894	Success	0.107002
473	00_img523.jpg	FruitKnife	717	495	440	256	-65.1055	0.736182	0.102371	Success	0.215189
474	00_img524.jpg	O2	941	366	438	184	-33.7817	0.832213	1.56794	Success	0.109998
475	00_img525.jpg	RedMedicine	433	525	324	142	-54.0576	0.941262	0.634659	Success	0.108996
476	00_img526.jpg	RedMedicine	749	461	324	142	-49.5879	0.958349	0.74707	Success	0.121996
477	00_img527.jpg	RedMedicine	383	557	324	142	-46.5569	0.973952	1.02247	Success	0.104001
478	00_img528.jpg	Xisat	333	557	526	144	-28.8516	0.947501	1.47211	Success	0.103002
479	00_img529.jpg	Yogurt	429	368	478	196	-51.3287	0.824325	0.554405	Success	0.136996
480	00_img53.jpg	Xisat	781	589	526	144	-11.9047	0.710058	4.82231	Success	0.114005
481	00_img530.jpg	Xisat	717	513	526	144	-39.7993	0.579352	0.822376	Success	0.169997
482	00_img531.jpg	O2	450	637	438	184	20.6124	0.755824	8.42055	Success	0.111998
483	00_img532.jpg	CokeBottle	397	525	576	202	80.9447	0.736288	4.4136	Success	0.163
484	00_img533.jpg	O2	545	543	438	184	-42.6965	0.978034	0.535286	Success	0.132001
485	00_img534.jpg	CokeBottle	733	493	576	202	14.1035	0.814553	7.54058	Success	0.113001
486	00_img535.jpg	Yogurt	429	544	478	196	-26.3903	0.962353	0.0558834	Success	0.142034
487	00_img536.jpg	Shampoo	701	621	448	170	-13.6713	0.905405	2.24305	Success	0.116998
488	00_img537.jpg	Yogurt	493	589	478	196	-34.8054	0.970012	0.271961	Success	0.16252
489	00_img538.jpg	Xisat	477	413	526	144	-20.278	0.469906	0.290863	Success	0.13355
490	00_img539.jpg	LaptopClean	621	333	442	174	-9.33439	0.783832	1.10448	Success	0.101998
491	00_img54.jpg	Pepper	370	701	366	156	-71.8976	0.889159	0.379257	Success	0.150998
492	00_img540.jpg	HandClean	893	494	392	214	-33.7444	0.959503	1.6246	Success	0.152999
493	00_img541.jpg	PaperKnife	1005	621	532	146	43.0213	0.565784	17.766	Success	0.123995
494	00_img542.jpg	O2	718	477	438	184	-54.7976	0.950402	1.55201	Success	0.169
495	00_img543.jpg	PurpleMedicine	349	627	300	146	82.9692	0.741582	1.76154	Success	0.103
496	00_img544.jpg	RedMedicine	640	397	324	142	-73.0642	0.801909	1.06606	Success	0.109004
497	00_img545.jpg	GreenGlue	861	445	494	106	-64.3281	0.79689	4.76504	Success	0.140995
498	00_img546.jpg	Shampoo	621	557	448	170	-43.6719	0.879255	2.13737	Success	0.164973
499	00_img547.jpg	GreenGlue	622	449	494	106	-56.9906	0.497651	3.30854	Success	0.139514
500	00_img548.jpg	Pepper	573	658	366	156	-24.8678	0.6225	1.52131	Success	0.0959985
501	00_img549.jpg	Block	365	605	278	120	-61.7655	0.730509	0.0696945	Success	0.151995
502	00_img55.jpg	HandClean	605	449	392	214	52.7172	0.894845	0.573105	Success	0.151302
503	00_img550.jpg	FruitKnife	653	509	440	256	79.1083	0.660231	1.65507	Success	0.202913
504	00_img551.jpg	Xisat	431	429	526	144	-45.5803	0.89542	0.175217	Success	0.124741
505	00_img552.jpg	LaptopClean	541	496	442	174	-28.9555	0.734776	1.72231	Success	0.150001
506	00_img553.jpg	FruitKnife	656	589	440	256	78.6274	0.771562	0.0574722	Success	0.159
507	00_img554.jpg	T1	605	525	432	114	-35.6538	0.733346	0.182243	Success	0.125001
508	00_img555.jpg	Pepper	541	429	366	156	82.0874	0.866403	0.1175	Success	0.0909996
509	00_img556.jpg	FruitKnife	605	493	440	256	-57.4584	0.934128	2.4936	Success	0.203971
510	00_img557.jpg	Xisat	333	461	526	144	-42.8093	0.86168	0.14526	Success	0.127
511	00_img558.jpg	HandClean	429	445	392	214	-30.575	0.92835	1.09599	Success	0.153001
512	00_img559.jpg	Yogurt	893	669	478	196	-33.6133	0.779742	0.579178	Success	0.141002
513	00_img56.jpg	T1	509	541	432	114	-30.3286	0.901576	1.83842	Success	0.0959976
514	00_img560.jpg	ABBottle	717	495	474	186	-64.4319	0.735389	0.238464	Success	0.134906
515	00_img561.jpg	FruitKnife	654	477	440	256	79.0702	0.761664	1.20438	Success	0.206996
516	00_img562.jpg	LaptopClean	525	509	442	174	-18.5775	0.819773	0.707155	Success	0.169003
517	00_img563.jpg	O2	621	237	438	184	-75.5711	0.756075	1.66966	Success	0.198
518	00_img564.jpg	GreenGlue	541	365	494	106	-37.8398	0.733397	2.70307	Success	0.137539
519	00_img565.jpg	Glue	317	365	488	230	80.5135	0.546833	1.30925	Success	0.206994
520	00_img566.jpg	T1	605	445	432	114	-78.5948	0.761596	5.40663	Success	0.158968
521	00_img567.jpg	Glue	333	589	488	230	-25.0226	0.842595	1.23438	Success	0.109001
522	00_img568.jpg	Shampoo	414	557	448	170	-56.6151	0.809742	1.39716	Success	0.132002
523	00_img569.jpg	T1	448	546	432	114	-70.7976	0.846901	1.40309	Success	0.145684
524	00_img57.jpg	LaptopClean	413	609	442	174	-22.8266	0.810596	0.257736	Success	0.103971
525	00_img570.jpg	Xisat	397	558	526	144	-45.8311	0.653164	1.4473	Success	0.172973
526	00_img571.jpg	ABBottle	559	592	474	186	-49.6115	0.873362	0.00180054	Success	0.128996
527	00_img572.jpg	CokeBottle	641	461	576	202	-66.6405	0.799829	1.33472	Success	0.174996
528	00_img573.jpg	O2	493	541	438	184	-67.3378	0.935779	0.639664	Success	0.145002
529	00_img574.jpg	GreenGlue	413	621	494	106	44.1508	0.319019	26.3333	Success	0.0890014
530	00_img575.jpg	PaperKnife	573	509	532	146	-65.9734	0.638021	8.60005	Success	0.16797
531	00_img576.jpg	PaperKnife	797	560	532	146	-55.5102	0.936487	0.662422	Success	0.152993
532	00_img577.jpg	LaptopClean	557	573	442	174	-24.8404	0.891403	1.90526	Success	0.133001
533	00_img578.jpg	FruitKnife	685	413	440	256	80.221	0.724244	0.104088	Success	0.217
534	00_img579.jpg	Shampoo	801	429	448	170	-82.2444	0.837855	0.639687	Success	0.100995
535	00_img58.jpg	ABBottle	621	445	474	186	-56.4727	0.739026	0.635578	Success	0.14786
536	00_img580.jpg	O2	573	397	438	184	-40.3065	0.9629	0.419369	Success	0.151004
537	00_img581.jpg	Block	381	707	278	120	64.3955	0.914029	1.25521	Success	0.117006
538	00_img582.jpg	Glue	861	621	488	230	-52.1279	0.910001	3.51377	Success	0.168
539	00_img583.jpg	Pepper	861	578	366	156	-8.8968	0.722394	4.42928	Success	0.112001
540	00_img584.jpg	PurpleMedicine	547	464	300	146	-53.9415	0.933268	0.0314827	Success	0.0999975
541	00_img585.jpg	Shampoo	382	573	448	170	-14.2649	0.926593	0.0997124	Success	0.113
542	00_img586.jpg	O2	621	589	438	184	-49.734	0.876056	0.141838	Success	0.13
543	00_img587.jpg	DrillCover	621	541	454	148	-3.33578	0.941191	0.781843	Success	0.104004
544	00_img588.jpg	Yogurt	462	541	478	196	-45.3805	0.913778	0.152538	Success	0.159376
545	00_img589.jpg	GreenSoap	573	589	396	274	57.0384	0.831808	5.11042	Success	0.138007
546	00_img59.jpg	Xisat	749	413	526	144	-30.9049	0.50795	0.75713	Success	0.126003
547	00_img590.jpg	Xisat	397	605	526	144	-53.0329	0.895461	1.90467	Success	0.152997
548	00_img591.jpg	Xisat	318	397	526	144	-66.4177	0.6194	5.07632	Success	0.141999
549	00_img592.jpg	PurpleMedicine	835	545	300	146	-47.6268	0.977053	0.3475	Success	0.122997
550	00_img593.jpg	Shampoo	653	477	448	170	-48.6479	0.853714	4.53615	Success	0.119003
551	00_img594.jpg	Yogurt	765	573	478	196	-65.6018	0.911121	1.09254	Success	0.13
552	00_img595.jpg	GreenGlue	781	365	494	106	-76.1148	0.52649	5.14188	Success	0.107998
553	00_img596.jpg	PurpleMedicine	861	397	300	146	-82.1111	0.720691	15.556	Success	0.109002
554	00_img597.jpg	T1	463	525	432	114	-30.7057	0.959331	0.63566	Success	0.122971
555	00_img598.jpg	GreenSoap	384	527	396	274	-31.0523	0.97333	0.170214	Success	0.133997
556	00_img599.jpg	RedMedicine	690	482	324	142	-39.3175	0.970473	0.805519	Success	0.101843
557	00_img6.jpg	Pepper	509	317	366	156	-27.1928	0.740215	1.06519	Success	0.120304
558	00_img60.jpg	RedMedicine	845	579	324	142	80.8635	0.968786	1.17458	Success	0.099997
559	00_img61.jpg	GreenGlue	365	461	494	106	-39.0732	0.571992	1.09867	Success	0.12697
560	00_img62.jpg	SoftWash	541	461	390	264	-37.117	0.981507	0.611797	Success	0.192002
561	00_img63.jpg	GreenSoap	445	541	396	274	59.4195	0.851507	1.85006	Success	0.157002
562	00_img64.jpg	RedMedicine	477	461	324	142	-47.8879	0.914214	2.25752	Success	0.0899982
563	00_img65.jpg	CokeBottle	749	365	576	202	-79.3225	0.758416	2.30562	Success	0.158002
564	00_img66.jpg	O2	589	461	438	184	-67.8374	0.619322	0.474564	Success	0.154669
565	00_img67.jpg	Xisat	557	669	526	144	-16.1959	0.592099	2.43875	Success	0.132002
566	00_img68.jpg	O2	611	448	438	184	82.0877	0.578109	0.702263	Success	0.181969
567	00_img69.jpg	O2	751	449	438	184	-73.7029	0.902386	1.13581	Success	0.166517
568	00_img7.jpg	Pepper	829	381	366	156	-22.6656	0.755796	0.386288	Success	0.0990057
569	00_img70.jpg	PaperKnife	654	591	532	146	-43.0719	0.89965	1.36598	Success	0.151998
570	00_img71.jpg	ABBottle	734	541	474	186	-80.3604	0.651986	0.0416565	Success	0.131121
571	00_img72.jpg	PaperKnife	413	573	532	146	-45.3953	0.916205	0.951473	Success	0.141001
572	00_img73.jpg	Pepper	445	493	366	156	-48.1131	0.951255	0.824383	Success	0.111003
573	00_img74.jpg	Glue	845	366	488	230	-30.6148	0.927852	0.662939	Success	0.134004
574	00_img75.jpg	Xisat	717	653	526	144	-0.502411	0.788303	0.543466	Success	0.135973
575	00_img76.jpg	O2	369	557	438	184	82.6651	0.669204	2.19787	Success	0.146001
576	00_img77.jpg	RedMedicine	509	415	324	142	-53.673	0.911561	1.07124	Success	0.126188
577	00_img78.jpg	T1	414	430	432	114	-21.354	0.850922	1.44384	Success	0.107844
578	00_img79.jpg	LaptopClean	227	561	442	174	-57.6152	0.657146	1.3567	Success	0.159654
579	00_img8.jpg	LaptopClean	829	446	442	174	-66.5888	0.440247	1.73062	Success	0.143
580	00_img80.jpg	PurpleMedicine	482	653	300	146	-72.3185	0.883744	1.7271	Success	0.110998
581	00_img81.jpg	Yogurt	589	509	478	196	-33.7636	0.896935	0.441731	Success	0.193
582	00_img82.jpg	O2	749	589	438	184	-38.1191	0.834673	3.47419	Success	0.182991
583	00_img83.jpg	RedMedicine	413	589	324	142	-66.2775	0.797849	1.20795	Success	0.128
584	00_img84.jpg	LaptopClean	493	511	442	174	-20.0468	0.9177	0.24552	Success	0.157919
585	00_img85.jpg	SoftWash	269	610	390	264	63.3597	0.95468	0.996723	Success	0.207328
586	00_img86.jpg	T1	349	685	432	114	-10.9504	0.82562	2.95682	Success	0.0875497
587	00_img87.jpg	PurpleMedicine	557	401	300	146	-63.5985	0.825653	2.92123	Success	0.108999
588	00_img88.jpg	CokeBottle	429	621	576	202	-70.0709	0.521594	4.92964	Success	0.174531
589	00_img89.jpg	GreenGlue	754	431	494	106	-55.3	0.575449	3.77366	Success	0.125
590	00_img9.jpg	O2	624	402	438	184	-59.2917	0.965721	0.489693	Success	0.169
591	00_img90.jpg	CokeBottle	349	461	576	202	-78.924	0.861148	0.920616	Success	0.196014
592	00_img91.jpg	T1	527	397	432	114	-60.9438	0.760739	2.51295	Success	0.175999
593	00_img92.jpg	ABBottle	447	589	474	186	-37.8909	0.938981	0.456692	Success	0.147995
594	00_img93.jpg	MilkBottle	333	429	532	238	-48.8802	0.785328	0.552563	Success	0.205005
595	00_img94.jpg	T1	589	285	432	114	-22.8253	0.738786	2.94929	Success	0.100003
596	00_img95.jpg	T1	686	397	432	114	-65.1846	0.876068	0.225891	Success	0.131001
597	00_img96.jpg	Xisat	381	541	526	144	-36.2392	0.505293	1.29676	Success	0.163999
598	00_img97.jpg	Yogurt	541	509	478	196	-20.1853	0.859699	0.936226	Success	0.123976
599	00_img98.jpg	T1	493	448	432	114	-29.3602	0.641529	0.90806	Success	0.0946052
600	00_img99.jpg	ABBottle	589	493	474	186	-38.382	0.849129	0.463776	Success	0.126019
601	01_img0.jpg	GreenGlue	845	333	494	106	-79.5524	0.455438	3.10641	Success	0.101001
602	01_img0.jpg	FruitKnife	253	557	440	256	-79.3668	0.687297	1.51428	Success	0.165997
603	01_img1.jpg	GreenGlue	319	573	494	106	-63.4292	0.54131	3.85555	Success	0.103997
604	01_img1.jpg	FruitKnife	829	365	440	256	74.2801	0.855135	8.37257	Success	0.155
605	01_img10.jpg	FruitKnife	765	557	440	256	70.5223	0.800266	4.69975	Success	0.078275
606	01_img10.jpg	Pepper	271	306	366	156	-33.5471	0.750756	0.0323715	Success	0.138972
607	01_img100.jpg	CokeBottle	877	509	576	202	-78.8891	0.62528	0.000282288	Success	0.076
608	01_img100.jpg	HandClean	253	574	392	214	52.1781	0.595967	30.5132	Fail	0.130991
609	01_img101.jpg	CokeBottle	989	605	576	202	4.518	0.753187	0.785446	Success	0.0930049
610	01_img101.jpg	HandClean	301	370	392	214	53.1923	0.763957	5.14539	Success	0.150002
611	01_img102.jpg	CokeBottle	429	429	576	202	-80.0238	0.462311	6.51773	Success	0.0919988
612	01_img102.jpg	HandClean	893	480	392	214	53.1606	0.840051	0.240959	Success	0.141298
613	01_img103.jpg	CokeBottle	957	509	576	202	-74.229	0.487087	0.24144	Success	0.147951
614	01_img103.jpg	HandClean	333	625	392	214	52.3397	0.806401	8.96884	Success	0.0959749
615	01_img104.jpg	CokeBottle	291	317	576	202	-72.8392	0.78409	0.0717316	Success	0.140999
616	01_img104.jpg	HandClean	893	495	392	214	51.8534	0.799082	1.24257	Success	0.0959964
617	01_img105.jpg	PaperKnife	259	541	532	146	-2.45623	0.677999	3.3793	Success	0.120001
618	01_img105.jpg	DrillCover	877	509	454	148	-1.50037	0.908717	2.25998	Success	0.0879982
619	01_img106.jpg	PaperKnife	877	365	532	146	-8.80712	0.652915	0.572144	Success	0.140972
620	01_img106.jpg	DrillCover	893	317	454	148	-3.83073	0	43.1633	Fail	0.0999489
621	01_img107.jpg	PaperKnife	333	509	532	146	-15.6451	0	68.3903	Fail	0.141998
622	01_img107.jpg	DrillCover	365	510	454	148	-17.387	0.906656	2.57006	Success	0.0919995
623	01_img108.jpg	PaperKnife	861	541	532	146	-16.9452	0.735076	0.0937519	Success	0.118014
624	01_img108.jpg	DrillCover	829	525	454	148	-22.4725	0	78.4651	Fail	0.103999
625	01_img109.jpg	PaperKnife	941	685	532	146	84.0545	0	3.17979	Fail	0.145997
626	01_img109.jpg	DrillCover	928	621	454	148	83.1972	0.822084	3.21249	Success	0.097033
627	01_img11.jpg	FruitKnife	417	669	440	256	32.6892	0.742101	15.3518	Success	0.12
628	01_img11.jpg	Pepper	845	365	366	156	-61.303	0.920593	0.0462074	Success	0.105
629	01_img110.jpg	PaperKnife	701	445	532	146	52.826	0	30.5981	Fail	0.145999
630	01_img110.jpg	DrillCover	909	477	454	148	-68.1424	0.820317	2.94812	Success	0.094003
631	01_img111.jpg	PaperKnife	493	334	532	146	43.4734	0.425508	3.35563	Success	0.134007
632	01_img111.jpg	DrillCover	765	590	454	148	-24.9847	0.727776	2.86024	Success	0.0900018
633	01_img112.jpg	PaperKnife	845	557	532	146	7.50049	0.487909	7.32008	Success	0.161981
634	01_img112.jpg	DrillCover	387	446	454	148	15.047	0.615218	7.23363	Success	0.083998
635	01_img113.jpg	PaperKnife	384	381	532	146	-4.65703	0.175147	2.58567	Fail	0.113994
636	01_img113.jpg	DrillCover	765	637	454	148	-10.0207	0.717932	1.17448	Success	0.074996
637	01_img114.jpg	PaperKnife	669	685	532	146	-24.0666	0.183049	62.4612	Fail	0.127999
638	01_img114.jpg	DrillCover	336	461	454	148	-74.7827	0.935248	1.77001	Success	0.0969958
639	01_img115.jpg	PaperKnife	845	301	532	146	-25.2636	0.827661	3.33078	Success	0.168005
640	01_img115.jpg	DrillCover	349	653	454	148	-17.5088	0.902087	1.93595	Success	0.106002
641	01_img116.jpg	PaperKnife	813	605	532	146	-30.1849	0.901199	2.43273	Success	0.172994
642	01_img116.jpg	DrillCover	226	560	454	148	-46.7957	0.915895	2.63993	Success	0.147997
643	01_img117.jpg	PaperKnife	365	605	532	146	-22.8029	0.873697	3.0207	Success	0.143448
644	01_img117.jpg	DrillCover	814	509	454	148	-82.4677	0.47651	0.505005	Success	0.130101
645	01_img118.jpg	PaperKnife	381	417	532	146	-5.57243	0.857492	0.073442	Success	0.136997
646	01_img118.jpg	DrillCover	862	621	454	148	-73.7373	0.311763	30.9331	Fail	0.143993
647	01_img119.jpg	PaperKnife	861	621	532	146	34.6975	0	27.7698	Fail	0.122002
648	01_img119.jpg	DrillCover	861	621	454	148	35.2188	0.653548	15.8934	Success	0.175
649	01_img12.jpg	FruitKnife	227	445	440	256	-65.7627	0.857791	1.90857	Success	0.0996201
650	01_img12.jpg	Pepper	797	525	366	156	73.9466	0.741673	12.2901	Success	0.087625
651	01_img120.jpg	PaperKnife	333	685	532	146	-46.9445	0.50052	8.0099	Success	0.0899954
652	01_img120.jpg	DrillCover	847	333	454	148	-48.5947	0.945228	1.59679	Success	0.0809991
653	01_img121.jpg	PaperKnife	397	477	532	146	82.9189	0.37104	17.4028	Success	0.0870221
654	01_img121.jpg	DrillCover	861	653	454	148	82.24	0.696055	8.05727	Success	0.0860229
655	01_img122.jpg	PaperKnife	845	259	532	146	-22.4425	0.738145	4.97856	Success	0.0840204
656	01_img122.jpg	DrillCover	493	573	454	148	40.3501	0.610549	16.5275	Success	0.0760174
657	01_img123.jpg	O2	878	545	438	184	68.624	0.636426	22.3369	Success	0.107972
658	01_img123.jpg	RedMedicine	402	467	324	142	-42.0903	0.777659	0.0590706	Success	0.138215
659	01_img124.jpg	O2	893	477	438	184	-6.31239	0.836357	0.192282	Success	0.105975
660	01_img124.jpg	RedMedicine	349	515	324	142	15.1592	0.782324	11.6093	Success	0.136973
661	01_img125.jpg	O2	381	431	438	184	-3.75583	0	33.6626	Fail	0.0989983
662	01_img125.jpg	RedMedicine	387	419	324	142	-11.1468	0.901497	2.71237	Success	0.141573
663	01_img126.jpg	O2	305	493	438	184	-51.3267	0.89764	1.66384	Success	0.100999
664	01_img126.jpg	RedMedicine	851	461	324	142	-79.4037	0.919633	0.797714	Success	0.0949957
665	01_img127.jpg	O2	397	365	438	184	-10.6166	0.792551	2.57844	Success	0.139004
666	01_img127.jpg	RedMedicine	941	701	324	142	32.5607	0.717176	15.8992	Success	0.113973
667	01_img128.jpg	O2	413	397	438	184	-3.42588	0	36.4705	Fail	0.140973
668	01_img128.jpg	RedMedicine	415	381	324	142	-5.71323	0.92346	1.80503	Success	0.10997
669	01_img129.jpg	O2	365	573	438	184	-71.0296	0.754315	2.1916	Success	0.097693
670	01_img129.jpg	RedMedicine	878	403	324	142	-78.827	0.811731	5.61039	Success	0.098001
671	01_img13.jpg	FruitKnife	813	349	440	256	-48.9056	0.905192	3.61495	Success	0.133975
672	01_img13.jpg	Pepper	381	621	366	156	-38.1786	0.864587	3.17669	Success	0.086
673	01_img130.jpg	O2	349	385	438	184	78.0266	0.750563	13.0022	Success	0.100999
674	01_img130.jpg	RedMedicine	819	656	324	142	-29.3771	0.929867	0.66061	Success	0.0960021
675	01_img131.jpg	O2	445	656	438	184	-50.7619	0.846426	1.61968	Success	0.122522
676	01_img131.jpg	RedMedicine	813	307	324	142	-76.9185	0.695473	3.04439	Success	0.115998
677	01_img132.jpg	O2	819	578	438	184	-71.7847	0.437182	6.7668	Success	0.0939963
678	01_img132.jpg	RedMedicine	493	304	324	142	77.817	0.741318	9.57429	Success	0.0670035
679	01_img133.jpg	O2	973	573	438	184	-73.8513	0.659209	1.56683	Success	0.123004
680	01_img133.jpg	RedMedicine	477	498	324	142	-37.5092	0.924547	0.385654	Success	0.106999
681	01_img134.jpg	O2	973	557	438	184	-30.9189	0.885542	1.40081	Success	0.109002
682	01_img134.jpg	RedMedicine	383	467	324	142	-30.8659	0.761409	0.402805	Success	0.104997
683	01_img135.jpg	O2	365	621	438	184	75.3552	0.700412	17.2255	Success	0.101003
684	01_img135.jpg	RedMedicine	894	544	324	142	-77.2521	0.805384	1.04366	Success	0.0779707
685	01_img136.jpg	O2	477	400	438	184	31.1813	0.663604	13.0208	Success	0.101
686	01_img136.jpg	RedMedicine	861	595	324	142	-3.33119	0.84764	2.86334	Success	0.101001
687	01_img137.jpg	O2	909	621	438	184	-18.4931	0.805279	1.78077	Success	0.125997
688	01_img137.jpg	RedMedicine	274	483	324	142	-30.125	0.755668	0.84923	Success	0.107998
689	01_img138.jpg	O2	445	563	438	184	82.4318	0.484439	0.747963	Success	0.109
690	01_img138.jpg	RedMedicine	861	573	324	142	-38.5401	0.963571	0.504677	Success	0.108014
691	01_img139.jpg	O2	957	397	438	184	-45.535	0.8205	1.96062	Success	0.114121
692	01_img139.jpg	RedMedicine	498	701	324	142	-80.8366	0.842867	7.27431	Success	0.0809743
693	01_img14.jpg	FruitKnife	816	589	440	256	60.9179	0.883195	0.366184	Success	0.101886
694	01_img14.jpg	Pepper	301	354	366	156	-82.4032	0.881831	4.63599	Success	0.0909717
695	01_img140.jpg	O2	429	509	438	184	72.8738	0.638339	21.7834	Success	0.101999
696	01_img140.jpg	RedMedicine	913	547	324	142	-38.648	0.900234	4.21403	Success	0.109998
697	01_img141.jpg	O2	863	557	438	184	73.169	0.653472	21.0716	Success	0.109751
698	01_img141.jpg	RedMedicine	349	333	324	142	81.7432	0.919628	1.27068	Success	0.0969992
699	01_img142.jpg	O2	957	513	438	184	9.31006	0	88.2619	Fail	0.131999
700	01_img142.jpg	RedMedicine	973	509	324	142	7.50012	0.892816	1.27203	Success	0.114001
701	01_img143.jpg	GreenSoap	317	397	396	274	55.8676	0.820728	12.7085	Success	0.0969975
702	01_img143.jpg	MilkBottle	834	589	532	238	-48.9201	0.793341	5.80091	Success	0.0729985
703	01_img144.jpg	GreenSoap	973	414	396	274	32.9122	0.896171	4.89529	Success	0.114998
704	01_img144.jpg	MilkBottle	381	541	532	238	-47.619	0.871122	2.96569	Success	0.105
705	01_img145.jpg	GreenSoap	895	626	396	274	-67.0982	0.702062	15.0538	Success	0.103996
706	01_img145.jpg	MilkBottle	285	543	532	238	32.3055	0.768532	7.82611	Success	0.0879991
707	01_img146.jpg	GreenSoap	333	642	396	274	-35.3344	0.94485	0.044075	Success	0.126005
708	01_img146.jpg	MilkBottle	877	365	532	238	-47.0847	0.724389	16.3057	Success	0.105003
709	01_img147.jpg	GreenSoap	353	493	396	274	27.6201	0.84649	4.01813	Success	0.0860009
710	01_img147.jpg	MilkBottle	1005	461	532	238	32.2789	0.889253	4.70203	Success	0.109999
711	01_img148.jpg	GreenSoap	370	509	396	274	-47.0728	0.846636	9.03884	Success	0.125998
712	01_img148.jpg	MilkBottle	973	461	532	238	-47.0958	0.81788	4.58794	Success	0.0970044
713	01_img149.jpg	GreenSoap	365	477	396	274	-69.6198	0.746332	1.1786	Success	0.0989718
714	01_img149.jpg	MilkBottle	1005	429	532	238	28.0345	0.70293	17.3124	Success	0.0779939
715	01_img15.jpg	FruitKnife	349	608	440	256	-28.9982	0.750761	16.1895	Success	0.147999
716	01_img15.jpg	Pepper	894	429	366	156	82.4715	0.900891	0.163834	Success	0.107032
717	01_img150.jpg	GreenSoap	369	445	396	274	-34.9203	0.909117	4.25049	Success	0.136001
718	01_img150.jpg	MilkBottle	989	541	532	238	-46.6336	0.92828	2.69361	Success	0.0939987
719	01_img151.jpg	GreenSoap	989	509	396	274	-54.5367	0.837056	7.42036	Success	0.0979962
720	01_img151.jpg	MilkBottle	349	493	532	238	-45.5727	0.641533	23.8925	Success	0.096997
721	01_img152.jpg	GreenSoap	1005	541	396	274	61.6941	0.884956	7.31586	Success	0.0990012
722	01_img152.jpg	MilkBottle	381	461	532	238	32.5618	0.821338	8.33771	Success	0.100998
723	01_img153.jpg	GreenSoap	929	465	396	274	-50.9711	0.805153	9.69782	Success	0.105998
724	01_img153.jpg	MilkBottle	285	557	532	238	-47.9511	0.669283	8.29065	Success	0.102994
725	01_img154.jpg	GreenSoap	1053	669	396	274	-55.1086	0.888856	6.38309	Success	0.0889993
726	01_img154.jpg	MilkBottle	381	398	532	238	-47.4295	0.680204	18.5085	Success	0.0989718
727	01_img155.jpg	GreenSoap	417	721	396	274	42.343	0.945484	3.12269	Success	0.115
728	01_img155.jpg	MilkBottle	829	397	532	238	-50.1163	0.714071	7.8687	Success	0.0949988
729	01_img156.jpg	GreenSoap	337	433	396	274	-22.8551	0.948581	0.643642	Success	0.108001
730	01_img156.jpg	MilkBottle	845	589	532	238	36.8485	0.774097	7.20812	Success	0.0999975
731	01_img157.jpg	GreenSoap	350	466	396	274	-37.463	0.853691	8.44162	Success	0.122007
732	01_img157.jpg	MilkBottle	989	573	532	238	33.2613	0.925035	2.37927	Success	0.127995
733	01_img158.jpg	GreenSoap	301	574	396	274	36.7697	0.825946	12.0127	Success	0.0910401
734	01_img158.jpg	MilkBottle	877	493	532	238	-50.2588	0.805927	2.76029	Success	0.125037
735	01_img159.jpg	GreenSoap	303	445	396	274	60.314	0.809375	1.97672	Success	0.0999999
736	01_img159.jpg	MilkBottle	925	637	532	238	34.3075	0.815302	9.33395	Success	0.127
737	01_img16.jpg	FruitKnife	349	637	440	256	72.5926	0.693656	2.58733	Success	0.120996
738	01_img16.jpg	Pepper	765	321	366	156	17.1491	0.736287	12.0856	Success	0.100997
739	01_img160.jpg	GreenSoap	941	637	396	274	-23.8384	0.78172	15.8013	Success	0.127996
740	01_img160.jpg	MilkBottle	477	445	532	238	33.9848	0.705449	1.59722	Success	0.0980356
741	01_img161.jpg	GreenSoap	989	576	396	274	65.219	0.854338	0.377045	Success	0.101002
742	01_img161.jpg	MilkBottle	259	400	532	238	-46.8925	0.672196	5.12624	Success	0.115002
743	01_img162.jpg	GreenSoap	957	339	396	274	62.1555	0.772246	2.16265	Success	0.132
744	01_img162.jpg	MilkBottle	349	637	532	238	-48.1894	0.827523	5.6806	Success	0.096997
745	01_img163.jpg	GreenSoap	978	402	396	274	57.0638	0.830953	2.74313	Success	0.116997
746	01_img163.jpg	MilkBottle	286	493	532	238	-49.7627	0.823079	5.91115	Success	0.136997
747	01_img164.jpg	GreenSoap	957	637	396	274	-9.21045	0.868347	7.51907	Success	0.0809982
748	01_img164.jpg	MilkBottle	365	333	532	238	-44.3491	0.578697	30.3871	Fail	0.117005
749	01_img165.jpg	GreenSoap	957	621	396	274	-41.3831	0.854354	3.27224	Success	0.114997
750	01_img165.jpg	MilkBottle	461	317	532	238	29.2082	0.736073	0.143566	Success	0.136992
751	01_img166.jpg	Block	381	525	278	120	9.02731	0.808233	5.90585	Success	0.130998
752	01_img166.jpg	Yogurt	845	653	478	196	10.0048	0.780704	9.63538	Success	0.122997
753	01_img167.jpg	Block	382	243	278	120	9.05636	0.96124	0.0647793	Success	0.13
754	01_img167.jpg	Yogurt	669	685	478	196	10.0004	0.796818	10.1164	Success	0.142004
755	01_img168.jpg	Block	913	429	278	120	60.4387	0.809397	8.79386	Success	0.119998
756	01_img168.jpg	Yogurt	385	623	478	196	-41.8644	0.929707	2.24405	Success	0.136003
757	01_img169.jpg	Block	963	451	278	120	-30.1131	0.750964	13.8665	Success	0.068994
758	01_img169.jpg	Yogurt	354	653	478	196	80.3748	0.508673	4.37283	Success	0.107995
759	01_img17.jpg	FruitKnife	307	435	440	256	-76.2798	0.831037	6.07995	Success	0.116998
760	01_img17.jpg	Pepper	749	589	366	156	-24.6302	0.760271	0.349739	Success	0.124002
761	01_img170.jpg	Block	1008	557	278	120	48.9491	0.783092	11.7969	Success	0.0959973
762	01_img170.jpg	Yogurt	429	509	478	196	-31.0536	0.884315	0.156162	Success	0.0920007
763	01_img171.jpg	Block	957	531	278	120	-23.2206	0.706389	17.2323	Success	0.0833387
764	01_img171.jpg	Yogurt	429	477	478	196	-72.4717	0.788489	0.629501	Success	0.108723
765	01_img172.jpg	Block	995	493	278	120	-53.8603	0.817438	1.40836	Success	0.0919991
766	01_img172.jpg	Yogurt	494	477	478	196	77.5379	0.731187	14.5617	Success	0.108999
767	01_img173.jpg	Block	1010	557	278	120	55.218	0.718252	14.4335	Success	0.119975
768	01_img173.jpg	Yogurt	461	445	478	196	-3.28682	0.843026	1.82012	Success	0.109999
769	01_img174.jpg	Block	947	627	278	120	-10.8739	0.790214	9.83446	Success	0.11398
770	01_img174.jpg	Yogurt	431	381	478	196	-38.0217	0.877215	4.77151	Success	0.105005
771	01_img175.jpg	Block	399	653	278	120	-39.6255	0.934875	2.85615	Success	0.112996
772	01_img175.jpg	Yogurt	957	509	478	196	74.8172	0.732265	12.0844	Success	0.137997
773	01_img176.jpg	Block	371	445	278	120	41.4755	0.729126	15.0665	Success	0.124999
774	01_img176.jpg	Yogurt	957	496	478	196	-28.1911	0.917288	3.60833	Success	0.145993
775	01_img177.jpg	Block	385	291	278	120	-31.5964	0.720258	13.3058	Success	0.0939832
776	01_img177.jpg	Yogurt	723	573	478	196	-77.1314	0.408623	0.0483627	Success	0.113004
777	01_img178.jpg	Block	1005	606	278	120	-46.0628	0.851029	7.20814	Success	0.135187
778	01_img178.jpg	Yogurt	477	461	478	196	-14.715	0.879998	0.46236	Success	0.117318
779	01_img179.jpg	Block	398	670	278	120	58.5936	0.830202	7.72279	Success	0.102019
780	01_img179.jpg	Yogurt	605	333	478	196	-69.3452	0.650002	2.46838	Success	0.118114
781	01_img18.jpg	FruitKnife	573	701	440	256	-80.4133	0.772135	0.30188	Success	0.0889943
782	01_img18.jpg	Pepper	911	365	366	156	-69.5608	0.816691	4.43787	Success	0.108999
783	01_img180.jpg	Block	835	227	278	120	9.21702	0.817291	1.3365	Success	0.095037
784	01_img180.jpg	Yogurt	765	607	478	196	-26.8828	0.758734	9.39459	Success	0.107993
785	01_img181.jpg	Block	909	435	278	120	-26.5436	0.760203	13.1462	Success	0.0959992
786	01_img181.jpg	Yogurt	509	605	478	196	-61.6002	0.736909	0.198296	Success	0.109014
787	01_img182.jpg	Block	862	621	278	120	-45.7763	0.89524	0.483971	Success	0.13404
788	01_img182.jpg	Yogurt	477	429	478	196	76.9909	0.642403	17.0454	Success	0.135247
789	01_img183.jpg	Block	813	723	278	120	68.8893	0.891001	3.30409	Success	0.113002
790	01_img183.jpg	Yogurt	639	285	478	196	-2.61546	0.954035	1.29016	Success	0.137
791	01_img184.jpg	Block	627	701	278	120	-10.2465	0.762783	12.3707	Success	0.127006
792	01_img184.jpg	Yogurt	925	413	478	196	-68.0992	0.566016	3.39162	Success	0.132001
793	01_img185.jpg	Block	290	578	278	120	-24.4773	0.718152	16.3911	Success	0.139049
794	01_img185.jpg	Yogurt	893	509	478	196	-31.1737	0.954778	0.152651	Success	0.111002
795	01_img186.jpg	Block	301	307	278	120	68.8579	0.785319	7.07843	Success	0.164994
796	01_img186.jpg	Yogurt	861	573	478	196	81.9509	0.708894	0.619263	Success	0.115
797	01_img187.jpg	Block	963	461	278	120	-59.4421	0	11.7297	Fail	0.154
798	01_img187.jpg	Yogurt	925	559	478	196	81.4131	0.585792	0.995995	Success	0.123995
799	01_img188.jpg	Block	909	368	278	120	60.464	0.78446	9.63536	Success	0.153998
800	01_img188.jpg	Yogurt	413	685	478	196	-47.0691	0.864234	4.5345	Success	0.140999
801	01_img189.jpg	Block	403	659	278	120	27.9179	0.815092	8.80531	Success	0.173005
802	01_img189.jpg	Yogurt	878	509	478	196	80.7093	0.434363	3.03859	Success	0.134515
803	01_img19.jpg	FruitKnife	349	381	440	256	32.7609	0.856481	1.70234	Success	0.0780008
804	01_img19.jpg	Pepper	749	637	366	156	-44.005	0.74633	2.28915	Success	0.10921
805	01_img190.jpg	Block	861	685	278	120	8.76331	0.954654	0.838063	Success	0.157002
806	01_img190.jpg	Yogurt	413	365	478	196	-20.4221	0.809945	0.13566	Success	0.142012
807	01_img191.jpg	Block	288	659	278	120	40.3353	0.768924	12.1841	Success	0.126508
808	01_img191.jpg	Yogurt	877	525	478	196	81.1807	0.598317	3.37875	Success	0.132998
809	01_img192.jpg	Block	339	531	278	120	-60.9044	0.876998	5.37678	Success	0.133997
810	01_img192.jpg	Yogurt	926	637	478	196	18.5081	0.773303	9.77056	Success	0.129001
811	01_img193.jpg	Block	477	273	278	120	-24.779	0.761786	12.9551	Success	0.0949962
812	01_img193.jpg	Yogurt	893	589	478	196	-38.0435	0.929124	0.276951	Success	0.107991
813	01_img194.jpg	SmallMedicine	339	461	260	158	-37.9829	0.640212	36.4645	Fail	0.0949926
814	01_img194.jpg	T1	877	445	432	114	-25.9955	0.773085	0.164425	Success	0.131997
815	01_img195.jpg	SmallMedicine	624	253	260	158	-57.4311	0.72946	8.72502	Success	0.151001
816	01_img195.jpg	T1	701	655	432	114	-81.433	0.762973	3.99533	Success	0.127
817	01_img196.jpg	SmallMedicine	642	243	260	158	55.0534	0.751584	13.3903	Success	0.112997
818	01_img196.jpg	T1	669	685	432	114	-25.93	0.90592	2.24612	Success	0.135999
819	01_img197.jpg	SmallMedicine	927	269	260	158	-63.4841	0.885463	0.0569572	Success	0.156991
820	01_img197.jpg	T1	541	627	432	114	-63.8696	0.826873	0.787899	Success	0.120998
821	01_img198.jpg	SmallMedicine	963	323	260	158	11.5876	0.772538	15.3766	Success	0.128006
822	01_img198.jpg	T1	525	557	432	114	-17.613	0.787286	0.270447	Success	0.117011
823	01_img199.jpg	SmallMedicine	973	333	260	158	-63.5285	0.775677	0.371323	Success	0.112002
824	01_img199.jpg	T1	419	605	432	114	-81.5297	0.46144	4.89804	Success	0.125001
825	01_img2.jpg	GreenGlue	829	557	494	106	55.0052	0.405558	21.1092	Success	0.089
826	01_img2.jpg	FruitKnife	382	445	440	256	43.0429	0.790868	2.07204	Success	0.108005
827	01_img20.jpg	MilkBottle	445	525	532	238	-48.8617	0.59723	10.6897	Success	0.112976
828	01_img20.jpg	FruitKnife	893	306	440	256	68.4613	0.801502	11.7365	Success	0.102
829	01_img200.jpg	SmallMedicine	957	338	260	158	30.2198	0.808909	8.99363	Success	0.139
830	01_img200.jpg	T1	429	482	432	114	-5.10695	0.763593	0.288992	Success	0.121933
831	01_img201.jpg	SmallMedicine	979	419	260	158	-59.399	0.731072	1.00989	Success	0.115
832	01_img201.jpg	T1	419	497	432	114	82.9546	0.519169	3.02994	Success	0.121999
833	01_img202.jpg	SmallMedicine	865	654	260	158	50.0603	0.697471	9.97591	Success	0.123995
834	01_img202.jpg	T1	413	317	432	114	-15.1317	0.879065	2.34071	Success	0.142
835	01_img203.jpg	SmallMedicine	877	643	260	158	32.2957	0.964828	1.46631	Success	0.130979
836	01_img203.jpg	T1	435	285	432	114	19.099	0.808748	5.92012	Success	0.113001
837	01_img204.jpg	SmallMedicine	403	643	260	158	-66.3601	0.81537	3.55154	Success	0.104997
838	01_img204.jpg	T1	909	397	432	114	10.8621	0.750237	5.0637	Success	0.110997
839	01_img205.jpg	SmallMedicine	365	461	260	158	11.5476	0.884196	2.54637	Success	0.135998
840	01_img205.jpg	T1	909	541	432	114	-65.0057	0.58761	1.81658	Success	0.120996
841	01_img206.jpg	SmallMedicine	899	272	260	158	14.417	0.955973	1.99353	Success	0.130002
842	01_img206.jpg	T1	589	637	432	114	84.2096	0.650876	2.92496	Success	0.128004
843	01_img207.jpg	SmallMedicine	893	595	260	158	-62.5841	0.801619	12.2028	Success	0.140998
844	01_img207.jpg	T1	349	381	432	114	-32.2034	0.86649	0.648613	Success	0.119998
845	01_img208.jpg	SmallMedicine	701	611	260	158	26.1341	0.816386	10.2781	Success	0.122996
846	01_img208.jpg	T1	397	349	432	114	82.7125	0.699038	7.07644	Success	0.108998
847	01_img209.jpg	PurpleMedicine	301	541	300	146	-74.345	0.743198	4.68139	Success	0.133982
848	01_img209.jpg	SoftWash	813	606	390	264	58.4802	0.879054	7.73379	Success	0.0909991
849	01_img21.jpg	MilkBottle	381	381	532	238	30.2549	0.737007	11.3636	Success	0.101998
850	01_img21.jpg	FruitKnife	943	607	440	256	5.10565	0.923794	0.87796	Success	0.0819995
851	01_img210.jpg	PurpleMedicine	227	589	300	146	-15.7414	0.96038	0.220795	Success	0.111999
852	01_img210.jpg	SoftWash	782	339	390	264	-9.71723	0.832187	10.3799	Success	0.0939958
853	01_img211.jpg	PurpleMedicine	621	195	300	146	83.4642	0.721937	5.83276	Success	0.141001
854	01_img211.jpg	SoftWash	766	591	390	264	-23.5586	0.860772	1.53683	Success	0.112
855	01_img212.jpg	PurpleMedicine	685	221	300	146	-3.81583	0.849674	1.65615	Success	0.12799
856	01_img212.jpg	SoftWash	657	637	390	264	58.9494	0.814305	12.8201	Success	0.0929933
857	01_img213.jpg	PurpleMedicine	749	275	300	146	-17.0284	0.774809	6.10046	Success	0.144006
858	01_img213.jpg	SoftWash	509	608	390	264	14.9953	0.887352	6.36289	Success	0.0980036
859	01_img214.jpg	PurpleMedicine	909	461	300	146	-3.76354	0.908843	2.27574	Success	0.149972
860	01_img214.jpg	SoftWash	384	498	390	264	-65.1106	0.856055	6.57532	Success	0.108998
861	01_img215.jpg	PurpleMedicine	946	541	300	146	-9.13616	0.724306	2.72407	Success	0.110998
862	01_img215.jpg	SoftWash	381	477	390	264	60.6629	0.915009	1.19932	Success	0.105997
863	01_img216.jpg	PurpleMedicine	541	627	300	146	-12.2702	0.835416	1.60769	Success	0.101976
864	01_img216.jpg	SoftWash	893	333	390	264	12.3773	0.946018	2.87472	Success	0.082978
865	01_img217.jpg	PurpleMedicine	509	627	300	146	-37.1985	0.636031	11.4647	Success	0.102996
866	01_img217.jpg	SoftWash	909	349	390	264	56.17	0.887815	4.30098	Success	0.0950048
867	01_img218.jpg	PurpleMedicine	942	270	300	146	-78.3971	0.72315	8.22411	Success	0.139993
868	01_img218.jpg	SoftWash	509	611	390	264	62.3697	0.884774	0.125042	Success	0.0889938
869	01_img219.jpg	PurpleMedicine	945	610	300	146	-13.8351	0.692442	4.01862	Success	0.126996
870	01_img219.jpg	SoftWash	477	333	390	264	-20.1135	0.916144	1.90779	Success	0.0859954
871	01_img22.jpg	MilkBottle	861	509	532	238	-48.8511	0.859077	4.59031	Success	0.110973
872	01_img22.jpg	FruitKnife	365	493	440	256	-74.3626	0.672613	4.67429	Success	0.101976
873	01_img220.jpg	PurpleMedicine	387	605	300	146	82.895	0.753281	0.644508	Success	0.10798
874	01_img220.jpg	SoftWash	877	397	390	264	62.602	0.90895	1.10925	Success	0.095998
875	01_img221.jpg	Xisat	973	541	526	144	-49.6975	0.615696	0.00181198	Success	0.109003
876	01_img221.jpg	Glue	333	432	488	230	-29.207	0.707741	9.54959	Success	0.0979781
877	01_img222.jpg	Xisat	333	493	526	144	-1.82478	0.550813	2.2747	Success	0.106999
878	01_img222.jpg	Glue	749	525	488	230	-28.2919	0.317127	78.1675	Fail	0.0780034
879	01_img223.jpg	Xisat	877	605	526	144	-31.7853	0.824043	5.58317	Success	0.132005
880	01_img223.jpg	Glue	429	365	488	230	80.0491	0.426195	6.81168	Success	0.114004
881	01_img224.jpg	Xisat	349	285	526	144	8.87496	0	15.3913	Fail	0.125006
882	01_img224.jpg	Glue	366	285	488	230	6.7648	0.775642	6.32152	Success	0.103001
883	01_img225.jpg	Xisat	1021	621	526	144	11.4542	0.570651	7.45476	Success	0.121001
884	01_img225.jpg	Glue	418	445	488	230	-43.0535	0.684805	0.391491	Success	0.101003
885	01_img226.jpg	Xisat	397	333	526	144	-18.3937	0	50.5422	Fail	0.109
886	01_img226.jpg	Glue	381	349	488	230	-17.6861	0.663001	0.439672	Success	0.097008
887	01_img227.jpg	Xisat	317	445	526	144	-13.5579	0.574322	5.42237	Success	0.113003
888	01_img227.jpg	Glue	909	560	488	230	13.8603	0.766941	11.8514	Success	0.153002
889	01_img228.jpg	Xisat	285	355	526	144	-6.64068	0.818993	0.114488	Success	0.127983
890	01_img228.jpg	Glue	749	589	488	230	-53.2583	0.420414	13.3349	Success	0.161999
891	01_img229.jpg	Xisat	878	557	526	144	-24.9081	0.672078	5.78516	Success	0.120997
892	01_img229.jpg	Glue	227	352	488	230	-29.2483	0.532829	3.2783	Success	0.138996
893	01_img23.jpg	MilkBottle	413	621	532	238	24.7152	0.805535	8.99984	Success	0.136974
894	01_img23.jpg	FruitKnife	850	227	440	256	-49.3765	0.72898	11.9035	Success	0.147973
895	01_img230.jpg	PurpleMedicine	256	658	300	146	-27.1495	0.867426	6.91801	Success	0.134995
896	01_img230.jpg	CokeBottle	637	541	576	202	-78.3773	0.551272	3.29519	Success	0.128999
897	01_img231.jpg	PurpleMedicine	269	463	300	146	-16.3295	0.833892	2.48013	Success	0.137002
898	01_img231.jpg	CokeBottle	893	525	576	202	57.6721	0.577347	21.9813	Success	0.17404
899	01_img232.jpg	PurpleMedicine	257	462	300	146	9.1339	0.836504	1.84337	Success	0.101001
900	01_img232.jpg	CokeBottle	909	557	576	202	-5.48065	0.748446	3.94902	Success	0.120029
901	01_img233.jpg	PurpleMedicine	317	445	300	146	82.6176	0.618396	5.51283	Success	0.125003
902	01_img233.jpg	CokeBottle	941	397	576	202	-74.5599	0.627762	0.786842	Success	0.178006
903	01_img234.jpg	PurpleMedicine	883	435	300	146	-72.896	0.5865	7.40385	Success	0.0999992
904	01_img234.jpg	CokeBottle	365	445	576	202	-66.2771	0.838017	4.8467	Success	0.106999
905	01_img235.jpg	PurpleMedicine	413	397	300	146	-49.5854	0.773433	7.9392	Success	0.115999
906	01_img235.jpg	CokeBottle	845	622	576	202	45.5001	0.645208	17.8422	Success	0.137001
907	01_img236.jpg	PurpleMedicine	365	285	300	146	-8.61443	0.865676	2.73422	Success	0.131003
908	01_img236.jpg	CokeBottle	813	605	576	202	-23.8529	0.741442	11.827	Success	0.15588
909	01_img237.jpg	PurpleMedicine	915	305	300	146	-18.5621	0.626563	10.2098	Success	0.132003
910	01_img237.jpg	CokeBottle	445	653	576	202	6.57793	0.700602	1.58416	Success	0.140999
911	01_img238.jpg	PurpleMedicine	959	559	300	146	-61.4905	0.826669	6.27567	Success	0.130004
912	01_img238.jpg	CokeBottle	381	461	576	202	41.8897	0.621042	19.647	Success	0.192002
913	01_img239.jpg	Pepper	257	541	366	156	-75.4196	0.761526	0.357338	Success	0.156999
914	01_img239.jpg	CokeBottle	909	429	576	202	-41.1119	0.831905	6.38967	Success	0.195018
915	01_img24.jpg	PaperKnife	589	685	532	146	49.3256	0	19.2045	Fail	0.138
916	01_img24.jpg	RedMedicine	479	675	324	142	-47.5807	0.610193	1.75092	Success	0.155005
917	01_img240.jpg	Pepper	253	541	366	156	-42.6668	0.868122	0.291077	Success	0.146974
918	01_img240.jpg	CokeBottle	925	397	576	202	81.582	0.685588	1.60447	Success	0.137976
919	01_img241.jpg	Pepper	269	526	366	156	27.555	0.741128	12.3294	Success	0.142002
920	01_img241.jpg	CokeBottle	989	445	576	202	-29.4915	0.760107	6.45168	Success	0.133
921	01_img242.jpg	Pepper	291	557	366	156	-28.8555	0.790782	0.862078	Success	0.120002
922	01_img242.jpg	CokeBottle	909	445	576	202	-70.1836	0.665326	4.61674	Success	0.145029
923	01_img243.jpg	Pepper	302	525	366	156	-31.0126	0.622522	2.67968	Success	0.141994
924	01_img243.jpg	CokeBottle	957	509	576	202	65.7435	0.628986	18.8032	Success	0.165075
925	01_img244.jpg	Pepper	285	561	366	156	80.9706	0.795953	3.20968	Success	0.146003
926	01_img244.jpg	CokeBottle	893	573	576	202	-81.2977	0.595635	10.8364	Success	0.124004
927	01_img245.jpg	Pepper	957	413	366	156	77.5066	0.736075	11.4397	Success	0.138001
928	01_img245.jpg	CokeBottle	291	493	576	202	-65.1712	0.807867	6.66969	Success	0.175031
929	01_img246.jpg	Pepper	1037	417	366	156	19.9507	0.768377	11.4653	Success	0.116001
930	01_img246.jpg	CokeBottle	285	477	576	202	-30.8543	0.762687	8.40517	Success	0.110999
931	01_img247.jpg	Pepper	1021	445	366	156	-33.4161	0.772629	6.10987	Success	0.133002
932	01_img247.jpg	CokeBottle	365	477	576	202	17.631	0.841383	6.33509	Success	0.124
933	01_img248.jpg	Pepper	1005	467	366	156	-79.8097	0.864464	5.88595	Success	0.0660055
934	01_img248.jpg	CokeBottle	365	493	576	202	71.7684	0.637466	15.9516	Success	0.102497
935	01_img249.jpg	Pepper	947	493	366	156	65.1914	0.549222	30.0618	Fail	0.0779998
936	01_img249.jpg	CokeBottle	349	445	576	202	-78.8302	0.710019	3.91506	Success	0.117002
937	01_img25.jpg	PaperKnife	301	655	532	146	-30.222	0.796843	1.94217	Success	0.120002
938	01_img25.jpg	RedMedicine	817	451	324	142	-70.4677	0.77812	5.12126	Success	0.142454
939	01_img250.jpg	Pepper	973	448	366	156	-8.95688	0.813969	5.71806	Success	0.100004
940	01_img250.jpg	CokeBottle	291	493	576	202	-44.9146	0.59348	6.48283	Success	0.112005
941	01_img251.jpg	Pepper	977	499	366	156	-19.2309	0.772945	0.459545	Success	0.103997
942	01_img251.jpg	CokeBottle	365	589	576	202	-79.0976	0.404129	2.8512	Success	0.110997
943	01_img252.jpg	Pepper	947	531	366	156	-63.0733	0.776696	2.16042	Success	0.0759978
944	01_img252.jpg	CokeBottle	289	509	576	202	-47.0763	0.764609	3.64908	Success	0.127996
945	01_img253.jpg	Pepper	989	605	366	156	-5.97593	0.808409	4.93995	Success	0.109998
946	01_img253.jpg	CokeBottle	307	445	576	202	82.5572	0.621688	6.56684	Success	0.132001
947	01_img254.jpg	Pepper	1011	317	366	156	-43.4843	0.771457	11.0962	Success	0.0939963
948	01_img254.jpg	CokeBottle	349	509	576	202	-51.2963	0.906193	0.719986	Success	0.0989985
949	01_img255.jpg	Pepper	1027	339	366	156	61.4138	0.661024	17.4346	Success	0.0620008
950	01_img255.jpg	CokeBottle	301	557	576	202	-25.5682	0.632329	7.56737	Success	0.128001
951	01_img256.jpg	MilkBottle	1005	621	532	238	5.02808	0.84579	0.0287108	Success	0.103998
952	01_img256.jpg	Glue	227	445	488	230	-52.7666	0.558607	8.16513	Success	0.129998
953	01_img257.jpg	MilkBottle	973	494	532	238	-47.7795	0.896901	2.08951	Success	0.109973
954	01_img257.jpg	Glue	224	525	488	230	-14.3164	0.708919	1.65773	Success	0.131999
955	01_img258.jpg	MilkBottle	1005	605	532	238	31.2847	0.883816	5.60265	Success	0.120004
956	01_img258.jpg	Glue	253	493	488	230	-74.701	0.679089	7.43024	Success	0.142003
957	01_img259.jpg	MilkBottle	989	381	532	238	28.8439	0.747115	10.6942	Success	0.127006
958	01_img259.jpg	Glue	272	655	488	230	-19.9043	0.548773	0.626074	Success	0.127005
959	01_img26.jpg	PaperKnife	797	429	532	146	-14.997	0.797564	1.45532	Success	0.167998
960	01_img26.jpg	RedMedicine	355	579	324	142	-64.0314	0.831435	0.259583	Success	0.130022
961	01_img260.jpg	MilkBottle	383	461	532	238	-49.7353	0.76809	7.34407	Success	0.106998
962	01_img260.jpg	Glue	973	557	488	230	-61.713	0.635107	3.77751	Success	0.126023
963	01_img261.jpg	MilkBottle	413	413	532	238	35.3598	0.736394	6.79485	Success	0.0749946
964	01_img261.jpg	Glue	893	653	488	230	-10.9624	0.724011	0.31202	Success	0.127997
965	01_img262.jpg	MilkBottle	1005	542	532	238	30.1392	0.747018	2.80787	Success	0.119021
966	01_img262.jpg	Glue	317	429	488	230	-13.547	0.679321	4.97377	Success	0.135002
967	01_img263.jpg	MilkBottle	973	574	532	238	31.646	0.709636	6.19021	Success	0.0999994
968	01_img263.jpg	LaptopClean	413	541	442	174	83.5077	0.627544	13.0118	Success	0.105996
969	01_img264.jpg	MilkBottle	941	589	532	238	-44.5622	0.534014	30.7606	Fail	0.0669992
970	01_img264.jpg	LaptopClean	333	477	442	174	82.8068	0.577395	1.92892	Success	0.123006
971	01_img265.jpg	MilkBottle	1005	525	532	238	-42.9179	0.518666	33.8144	Fail	0.0750024
972	01_img265.jpg	LaptopClean	381	462	442	174	-1.62955	0.911305	0.23394	Success	0.129001
973	01_img266.jpg	MilkBottle	1005	509	532	238	31.4407	0.65698	4.91899	Success	0.113005
974	01_img266.jpg	LaptopClean	333	477	442	174	-52.8	0.77472	3.49808	Success	0.129004
975	01_img267.jpg	MilkBottle	861	509	532	238	-47.5156	0.765402	10.2116	Success	0.0860026
976	01_img267.jpg	LaptopClean	227	429	442	174	-22.423	0.787891	4.93091	Success	0.116999
977	01_img268.jpg	MilkBottle	413	557	532	238	30.2095	0.870183	3.44667	Success	0.126999
978	01_img268.jpg	LaptopClean	973	365	442	174	-1.48187	0.801423	0.627016	Success	0.115999
979	01_img269.jpg	MilkBottle	285	573	532	238	-48.2751	0.661327	7.81794	Success	0.101999
980	01_img269.jpg	LaptopClean	989	461	442	174	-43.054	0.935721	1.88435	Success	0.109996
981	01_img27.jpg	PaperKnife	768	589	532	146	33.095	0.629268	13.2325	Success	0.0810041
982	01_img27.jpg	RedMedicine	317	317	324	142	-28.6213	0.968434	1.375	Success	0.114998
983	01_img270.jpg	MilkBottle	349	605	532	238	34.9551	0.71521	16.5374	Success	0.0950289
984	01_img270.jpg	LaptopClean	893	429	442	174	-41.0431	0.864622	1.39574	Success	0.109129
985	01_img271.jpg	MilkBottle	333	589	532	238	20.2151	0.784018	11.0034	Success	0.097002
986	01_img271.jpg	LaptopClean	925	541	442	174	-6.06133	0.825839	4.7924	Success	0.107999
987	01_img272.jpg	MilkBottle	349	525	532	238	32.9148	0.831124	6.59175	Success	0.095001
988	01_img272.jpg	LaptopClean	989	589	442	174	-39.6904	0.911847	0.83189	Success	0.129998
989	01_img273.jpg	Yogurt	941	353	478	196	-20.2524	0.83461	7.11323	Success	0.0649998
990	01_img273.jpg	Pepper	285	530	366	156	-26.6042	0.798892	0.451212	Success	0.0980017
991	01_img274.jpg	Yogurt	925	541	478	196	-14.5569	0.896534	1.67361	Success	0.0969992
992	01_img274.jpg	Pepper	285	461	366	156	-16.3741	0.865372	0.165022	Success	0.118002
993	01_img275.jpg	Yogurt	893	448	478	196	-66.1	0.660029	2.80597	Success	0.0960317
994	01_img275.jpg	Pepper	307	445	366	156	79.5909	0.708119	10.1299	Success	0.0870349
995	01_img276.jpg	Yogurt	333	560	478	196	-49.0316	0.898229	0.385647	Success	0.101086
996	01_img276.jpg	Pepper	929	429	366	156	59.7854	0.612476	24.4917	Success	0.122017
997	01_img277.jpg	Yogurt	301	413	478	196	-6.43185	0.912405	2.19455	Success	0.111002
998	01_img277.jpg	Pepper	829	573	366	156	-12.6402	0.707947	1.52661	Success	0.101002
999	01_img278.jpg	Yogurt	349	509	478	196	-73.0083	0.865493	1.89854	Success	0.0990188
1000	01_img278.jpg	Pepper	1005	371	366	156	28.8686	0.75818	12.3679	Success	0.113019
1001	01_img279.jpg	Yogurt	335	525	478	196	67.9875	0.524199	32.4453	Fail	0.102
1002	01_img279.jpg	Pepper	957	493	366	156	79.2351	0.921847	1.25045	Success	0.0830009
1003	01_img28.jpg	SmallMedicine	464	611	260	158	49.6031	0.879967	6.05848	Success	0.113001
1004	01_img28.jpg	MilkBottle	701	429	532	238	-39.2546	0.735146	0.523907	Success	0.12
1005	01_img280.jpg	Yogurt	413	525	478	196	-15.2803	0.9086	0.172063	Success	0.0825148
1006	01_img280.jpg	Pepper	449	525	366	156	-31.053	0	19.3097	Fail	0.0819991
1007	01_img281.jpg	Yogurt	285	621	478	196	81.0504	0.548747	2.20274	Success	0.106006
1008	01_img281.jpg	Pepper	941	531	366	156	-1.06275	0.809113	0.566682	Success	0.0909977
1009	01_img282.jpg	Yogurt	877	429	478	196	-29.3527	0.944652	1.85217	Success	0.106998
1010	01_img282.jpg	Pepper	397	496	366	156	-31.0989	0.818077	2.32507	Success	0.0980012
1011	01_img283.jpg	Yogurt	909	481	478	196	81.3263	0.510644	8.10206	Success	0.0750108
1012	01_img283.jpg	Pepper	413	497	366	156	-6.43279	0.862521	1.41494	Success	0.0989978
1013	01_img284.jpg	Yogurt	928	349	478	196	-30.4576	0.956547	1.67305	Success	0.078999
1014	01_img284.jpg	Pepper	291	499	366	156	-77.5607	0.782259	2.47566	Success	0.118
1015	01_img285.jpg	CokeBottle	381	509	576	202	-65.0164	0.945347	1.96144	Success	0.109004
1016	01_img285.jpg	SmallMedicine	995	445	260	158	-54.3793	0.802174	5.84479	Success	0.101001
1017	01_img286.jpg	CokeBottle	333	525	576	202	-46.4249	0.77995	0.613892	Success	0.0979965
1018	01_img286.jpg	SmallMedicine	1088	349	260	158	-62.7799	0.85754	0.44421	Success	0.119995
1019	01_img287.jpg	CokeBottle	291	429	576	202	-15.7434	0.585491	4.65508	Success	0.0939963
1020	01_img287.jpg	SmallMedicine	1069	413	260	158	25.5984	0.749792	6.87713	Success	0.16703
1021	01_img288.jpg	CokeBottle	893	525	576	202	-39.6342	0.831327	0.553871	Success	0.0739989
1022	01_img288.jpg	SmallMedicine	305	493	260	158	8.82951	0.890195	0.812436	Success	0.138003
1023	01_img289.jpg	CokeBottle	893	381	576	202	1.94913	0.949022	0.0054369	Success	0.0910013
1024	01_img289.jpg	SmallMedicine	685	381	260	158	-53.9527	0	0.551853	Fail	0.139029
1025	01_img29.jpg	SmallMedicine	701	690	260	158	-66.8723	0.744199	0.691292	Success	0.0639973
1026	01_img29.jpg	MilkBottle	717	445	532	238	-39.1567	0.824714	2.47679	Success	0.135972
1027	01_img290.jpg	SmallMedicine	435	366	260	158	-60.2248	0.761885	4.48483	Success	0.0889797
1028	01_img290.jpg	T1	893	477	432	114	-36.1678	0.919259	1.06487	Success	0.127002
1029	01_img291.jpg	SmallMedicine	861	495	260	158	15.4494	0.943763	2.86786	Success	0.0829971
1030	01_img291.jpg	T1	397	461	432	114	-75.6383	0.796605	4.2602	Success	0.165003
1031	01_img292.jpg	SmallMedicine	992	531	260	158	-64.1322	0.896054	0.267906	Success	0.102
1032	01_img292.jpg	T1	496	482	432	114	9.65213	0.719849	4.2216	Success	0.167074
1033	01_img293.jpg	SmallMedicine	881	623	260	158	47.8889	0.871323	0.643292	Success	0.0679758
1034	01_img293.jpg	T1	398	445	432	114	-48.535	0.687983	0.672916	Success	0.120004
1035	01_img294.jpg	SmallMedicine	829	573	260	158	-65.3236	0.882737	3.81652	Success	0.101992
1036	01_img294.jpg	T1	365	483	432	114	-6.16809	0.702469	2.88659	Success	0.140996
1037	01_img295.jpg	T1	445	447	432	114	-8.76739	0.879745	1.67333	Success	0.093004
1038	01_img295.jpg	RedMedicine	941	461	324	142	-57.7826	0.756613	2.6002	Success	0.158029
1039	01_img296.jpg	T1	336	513	432	114	-35.347	0.548211	0.628719	Success	0.0880063
1040	01_img296.jpg	RedMedicine	899	403	324	142	-79.6273	0.757945	2.15359	Success	0.125027
1041	01_img297.jpg	T1	877	349	432	114	-34.5984	0.652824	1.54587	Success	0.0949998
1042	01_img297.jpg	RedMedicine	365	493	324	142	-12.3286	0.808118	3.67555	Success	0.132997
1043	01_img298.jpg	T1	941	589	432	114	-58.9041	0.868565	0.634171	Success	0.131
1044	01_img298.jpg	RedMedicine	368	365	324	142	-54.8081	0.941523	1.07988	Success	0.161
1045	01_img299.jpg	T1	909	367	432	114	78.36	0.726793	7.1965	Success	0.0909998
1046	01_img299.jpg	RedMedicine	301	541	324	142	-45.2789	0.947245	0.81815	Success	0.152002
1047	01_img3.jpg	GreenGlue	845	557	494	106	-72.0527	0.580478	1.04103	Success	0.132999
1048	01_img3.jpg	FruitKnife	270	349	440	256	-37.5582	0.722905	15.0814	Success	0.154996
1049	01_img30.jpg	SmallMedicine	653	670	260	158	-65.2377	0.718565	0.110199	Success	0.123001
1050	01_img30.jpg	MilkBottle	461	429	532	238	33.044	0.769222	12.6266	Success	0.112002
1051	01_img31.jpg	CokeBottle	493	445	576	202	67.8204	0.512766	23.5629	Success	0.127
1052	01_img31.jpg	SmallMedicine	723	657	260	158	-52.4488	0.810546	5.26558	Success	0.155031
1053	01_img32.jpg	CokeBottle	605	461	576	202	-61.2785	0.459794	1.98188	Success	0.106002
1054	01_img32.jpg	SmallMedicine	398	557	260	158	42.4849	0.837933	8.14148	Success	0.122999
1055	01_img33.jpg	CokeBottle	477	415	576	202	-77.5026	0.233059	30.5739	Fail	0.0780003
1056	01_img33.jpg	ABBottle	685	605	474	186	-30.3634	0.920637	0.747442	Success	0.113
1057	01_img34.jpg	ABBottle	589	493	474	186	56.5931	0.110599	10.5761	Fail	0.127
1058	01_img34.jpg	GreenSoap	813	497	396	274	-26.7753	0.936034	1.90277	Success	0.140029
1059	01_img35.jpg	ABBottle	717	413	474	186	19.1857	0.0319621	78.7574	Fail	0.135003
1060	01_img35.jpg	GreenSoap	749	413	396	274	13.1609	0.897036	0.0398541	Success	0.153996
1061	01_img36.jpg	ABBottle	637	445	474	186	-19.2103	0.249463	34.9003	Fail	0.133001
1062	01_img36.jpg	GreenSoap	717	397	396	274	-19.1352	0.873675	8.16803	Success	0.176998
1063	01_img37.jpg	ABBottle	494	445	474	186	-27.6527	0.378463	33.7439	Fail	0.106002
1064	01_img37.jpg	GreenSoap	321	562	396	274	63.3328	0.904048	0.675175	Success	0.163001
1065	01_img38.jpg	PaperKnife	461	448	532	146	36.7069	0.44004	16.4522	Success	0.128005
1066	01_img38.jpg	T1	783	653	432	114	-8.43701	0.704247	2.9212	Success	0.131001
1067	01_img39.jpg	PaperKnife	349	413	532	146	-45.3633	0.846114	4.09521	Success	0.105006
1068	01_img39.jpg	T1	926	413	432	114	-81.8013	0.597546	1.16846	Success	0.163994
1069	01_img4.jpg	GreenGlue	445	638	494	106	-41.4459	0.409419	1.57137	Success	0.0889978
1070	01_img4.jpg	FruitKnife	765	349	440	256	-53.858	0.925421	0.562458	Success	0.151029
1071	01_img40.jpg	PaperKnife	829	621	532	146	8.22989	0.411209	9.52271	Success	0.108003
1072	01_img40.jpg	T1	381	413	432	114	-35.9732	0.72573	1.24542	Success	0.115005
1073	01_img41.jpg	PaperKnife	557	429	532	146	48.5482	0.118333	79.9876	Fail	0.0680227
1074	01_img41.jpg	T1	653	285	432	114	-24.5684	0.813011	0.634569	Success	0.120999
1075	01_img42.jpg	PaperKnife	589	643	532	146	-2.74138	0.434297	1.09079	Success	0.0970275
1076	01_img42.jpg	T1	845	317	432	114	-14.3703	0.706043	3.48369	Success	0.119047
1077	01_img43.jpg	PaperKnife	829	669	532	146	66.3011	0.323055	32.1256	Fail	0.0920038
1078	01_img43.jpg	T1	333	413	432	114	-41.579	0.918262	0.716229	Success	0.114043
1079	01_img44.jpg	PaperKnife	589	621	532	146	-3.66752	0.272473	0.402574	Success	0.119002
1080	01_img44.jpg	T1	817	317	432	114	-24.7818	0.903548	1.75189	Success	0.124001
1081	01_img45.jpg	PaperKnife	445	685	532	146	-30.4104	0	54.848	Fail	0.128004
1082	01_img45.jpg	T1	449	734	432	114	-32.4951	0.764513	0.3806	Success	0.145001
1083	01_img46.jpg	PaperKnife	797	643	532	146	-20.6179	0.831604	4.73404	Success	0.131001
1084	01_img46.jpg	T1	461	323	432	114	-34.8353	0.617989	2.25473	Success	0.128001
1085	01_img47.jpg	PaperKnife	877	397	532	146	25.3725	0.606425	10.1567	Success	0.116003
1086	01_img47.jpg	T1	589	749	432	114	-27.3989	0.623951	1.31378	Success	0.152006
1087	01_img48.jpg	PaperKnife	813	669	532	146	-23.7522	0.544539	2.57964	Success	0.109002
1088	01_img48.jpg	T1	365	397	432	114	22.3254	0.663853	9.9435	Success	0.144002
1089	01_img49.jpg	PaperKnife	605	685	532	146	70.3588	0.32496	34.1785	Fail	0.11
1090	01_img49.jpg	T1	318	365	432	114	-72.7383	0.731415	0.084137	Success	0.159025
1091	01_img5.jpg	GreenGlue	365	429	494	106	83.8908	0.321274	10.2125	Success	0.139003
1092	01_img5.jpg	FruitKnife	877	589	440	256	70.0451	0.786047	1.50775	Success	0.160002
1093	01_img50.jpg	PaperKnife	845	685	532	146	-20.5432	0	73.9941	Fail	0.0890017
1094	01_img50.jpg	T1	877	685	432	114	-22.8951	0.926199	0.393269	Success	0.128999
1095	01_img51.jpg	PaperKnife	801	333	532	146	-21.957	0.475599	4.73167	Success	0.0959773
1096	01_img51.jpg	T1	767	671	432	114	-45.9057	0.384028	0.431416	Success	0.0980024
1097	01_img52.jpg	PaperKnife	781	659	532	146	-20.4675	0.624675	0.0625038	Success	0.0950015
1098	01_img52.jpg	T1	605	365	432	114	-20.692	0.767022	3.81418	Success	0.13
1099	01_img53.jpg	PaperKnife	893	669	532	146	-29.1857	0.714995	1.67923	Success	0.123999
1100	01_img53.jpg	T1	285	621	432	114	-32.9513	0.689186	0.470131	Success	0.155005
1101	01_img54.jpg	PaperKnife	397	637	532	146	-22.3294	0.664937	2.00673	Success	0.0920024
1102	01_img54.jpg	T1	861	381	432	114	-47.7177	0.913701	1.46485	Success	0.146027
1103	01_img55.jpg	PaperKnife	813	637	532	146	-34.6113	0.875218	0.256233	Success	0.128004
1104	01_img55.jpg	T1	369	349	432	114	-4.78446	0.541898	10.6989	Success	0.146001
1105	01_img56.jpg	PaperKnife	573	637	532	146	-8.91511	0.451904	0.0237198	Success	0.141997
1106	01_img56.jpg	T1	973	365	432	114	-30.9536	0.860157	1.97566	Success	0.135998
1107	01_img57.jpg	PaperKnife	365	445	532	146	-53.6341	0.857494	3.75459	Success	0.0859971
1108	01_img57.jpg	T1	973	478	432	114	83.8131	0.940615	1.15314	Success	0.145002
1109	01_img58.jpg	PaperKnife	861	637	532	146	-76.6683	0.171623	48.232	Fail	0.126001
1110	01_img58.jpg	T1	413	643	432	114	-42.2809	0.947947	0.99651	Success	0.159021
1111	01_img59.jpg	PaperKnife	605	653	532	146	-17.9816	0.895296	2.27322	Success	0.118005
1112	01_img59.jpg	T1	274	349	432	114	21.8135	0.423418	8.17811	Success	0.108002
1113	01_img6.jpg	FruitKnife	833	479	440	256	-54.3693	0.75843	11.7587	Success	0.112998
1114	01_img6.jpg	Pepper	301	589	366	156	79.5452	0.710264	9.05377	Success	0.176028
1115	01_img60.jpg	PaperKnife	800	685	532	146	-49.144	0.8286	1.13656	Success	0.142998
1116	01_img60.jpg	T1	413	397	432	114	83.8267	0.421658	7.19223	Success	0.144003
1117	01_img61.jpg	PaperKnife	413	461	532	146	-2.83559	0.479951	7.20643	Success	0.130002
1118	01_img61.jpg	T1	973	702	432	114	-18.9397	0.700889	3.5163	Success	0.147999
1119	01_img62.jpg	Pepper	717	353	366	156	80.9116	0.648316	6.58778	Success	0.116998
1120	01_img62.jpg	ABBottle	461	607	474	186	-27.9046	0.82445	4.6234	Success	0.145
1121	01_img63.jpg	Pepper	285	557	366	156	-59.3361	0.863612	0.816013	Success	0.173998
1122	01_img63.jpg	ABBottle	832	557	474	186	-75.7102	0.669457	0.401115	Success	0.17808
1123	01_img64.jpg	Pepper	957	669	366	156	79.0369	0.733574	5.51421	Success	0.152998
1124	01_img64.jpg	ABBottle	353	477	474	186	-58.7666	0.68775	1.6596	Success	0.144
1125	01_img65.jpg	Pepper	817	547	366	156	-55.8751	0.865805	1.72776	Success	0.146994
1126	01_img65.jpg	ABBottle	333	461	474	186	-64.3428	0.690411	3.39803	Success	0.131
1127	01_img66.jpg	Pepper	307	707	366	156	-80.5282	0.880226	0.431747	Success	0.182027
1128	01_img66.jpg	ABBottle	801	381	474	186	77.0758	0.623429	15.6042	Success	0.152021
1129	01_img67.jpg	Pepper	797	333	366	156	81.929	0.898013	0.719414	Success	0.158002
1130	01_img67.jpg	ABBottle	461	717	474	186	-44.4261	0.792888	2.10133	Success	0.111001
1131	01_img68.jpg	Pepper	909	621	366	156	76.8418	0.684298	14.9394	Success	0.111981
1132	01_img68.jpg	ABBottle	397	397	474	186	-76.1587	0.628969	3.32567	Success	0.102
1133	01_img69.jpg	Pepper	271	541	366	156	-52.0205	0.853603	0.0529518	Success	0.176002
1134	01_img69.jpg	ABBottle	893	525	474	186	36.4846	0.663614	16.3245	Success	0.145002
1135	01_img7.jpg	FruitKnife	765	573	440	256	64.3149	0.951178	0.37561	Success	0.172999
1136	01_img7.jpg	Pepper	349	269	366	156	40.535	0.667601	17.6539	Success	0.13003
1137	01_img70.jpg	Pepper	256	546	366	156	-19.5271	0.639861	4.84193	Success	0.133999
1138	01_img70.jpg	ABBottle	925	541	474	186	-46.5518	0.803519	1.45773	Success	0.112993
1139	01_img71.jpg	Pepper	781	467	366	156	-15.2472	0	26.8647	Fail	0.133001
1140	01_img71.jpg	ABBottle	770	477	474	186	-15.8924	0.876002	0.248436	Success	0.122
1141	01_img72.jpg	Pepper	371	541	366	156	-20.1383	0.823659	0.619434	Success	0.175002
1142	01_img72.jpg	ABBottle	957	465	474	186	75.7107	0.629907	17.2298	Success	0.121008
1143	01_img73.jpg	Pepper	893	387	366	156	-76.0676	0.885341	2.69098	Success	0.129997
1144	01_img73.jpg	ABBottle	365	625	474	186	73.5448	0.640286	20.7155	Success	0.0999997
1145	01_img74.jpg	Pepper	863	381	366	156	-26.7764	0.634262	3.71698	Success	0.174996
1146	01_img74.jpg	ABBottle	349	526	474	186	-50.3157	0.8718	0.141068	Success	0.160005
1147	01_img75.jpg	Pepper	241	525	366	156	-19.9656	0.614265	5.03637	Success	0.122999
1148	01_img75.jpg	ABBottle	848	541	474	186	-59.2656	0.751238	1.99346	Success	0.110997
1149	01_img76.jpg	Pepper	371	451	366	156	-27.8546	0.655212	0.887796	Success	0.119002
1150	01_img76.jpg	ABBottle	861	621	474	186	74.7743	0.696328	13.5074	Success	0.109005
1151	01_img77.jpg	Pepper	915	413	366	156	79.3964	0.775748	8.36915	Success	0.176999
1152	01_img77.jpg	ABBottle	333	592	474	186	-46.1067	0.91604	2.48001	Success	0.16
1153	01_img78.jpg	Shampoo	941	541	448	170	-0.723346	0.726012	1.21423	Success	0.207
1154	01_img78.jpg	LaptopClean	317	541	442	174	-6.57468	0.892673	4.27918	Success	0.152023
1155	01_img79.jpg	Shampoo	861	573	448	170	-48.2861	0.698679	3.23955	Success	0.143
1156	01_img79.jpg	LaptopClean	317	350	442	174	81.6421	0.62657	12.6832	Success	0.111999
1157	01_img8.jpg	FruitKnife	353	701	440	256	-57.3394	0.830685	8.0351	Success	0.205999
1158	01_img8.jpg	Pepper	835	400	366	156	-35.0052	0.857972	1.83155	Success	0.142002
1159	01_img80.jpg	Shampoo	925	669	448	170	-21.5809	0.895668	0.397055	Success	0.195007
1160	01_img80.jpg	LaptopClean	349	349	442	174	-15.1453	0.871792	3.07172	Success	0.181033
1161	01_img81.jpg	Shampoo	321	337	448	170	-17.7724	0.904837	1.04442	Success	0.124
1162	01_img81.jpg	LaptopClean	799	675	442	174	-22.3581	0.786824	1.16681	Success	0.113997
1163	01_img82.jpg	Shampoo	877	701	448	170	-10.58	0.82579	0.123425	Success	0.119001
1164	01_img82.jpg	LaptopClean	493	544	442	174	32.5886	0.523797	15.3241	Success	0.101997
1165	01_img83.jpg	Shampoo	846	541	448	170	83.3785	0.70682	0.512909	Success	0.129002
1166	01_img83.jpg	LaptopClean	845	557	442	174	82.6457	0	9.301	Fail	0.114017
1167	01_img84.jpg	Shampoo	927	638	448	170	-24.7802	0.774796	2.39181	Success	0.143001
1168	01_img84.jpg	LaptopClean	400	365	442	174	-1.38282	0.802766	5.12885	Success	0.101998
1169	01_img85.jpg	Shampoo	941	573	448	170	-81.0894	0.83246	0.187943	Success	0.106999
1170	01_img85.jpg	LaptopClean	941	605	442	174	-79.3145	0	46.824	Fail	0.113998
1171	01_img86.jpg	Shampoo	944	573	448	170	-36.7003	0.815303	5.48421	Success	0.172002
1172	01_img86.jpg	LaptopClean	418	462	442	174	-54.0977	0.790874	0.513931	Success	0.111265
1173	01_img87.jpg	Shampoo	930	383	448	170	-80.5547	0.875726	0.759659	Success	0.152001
1174	01_img87.jpg	LaptopClean	925	397	442	174	-79.7673	0	25.3319	Fail	0.119998
1175	01_img88.jpg	Shampoo	813	509	448	170	81.4226	0.598025	17.8053	Success	0.114008
1176	01_img88.jpg	LaptopClean	365	637	442	174	-43.4978	0.685779	3.02945	Success	0.105999
1177	01_img89.jpg	Shampoo	365	333	448	170	83.5726	0.637805	9.65305	Success	0.160003
1178	01_img89.jpg	LaptopClean	909	477	442	174	-54.0433	0.628871	5.79999	Success	0.0950031
1179	01_img9.jpg	FruitKnife	829	365	440	256	-45.6512	0.75339	1.19538	Success	0.118003
1180	01_img9.jpg	Pepper	429	655	366	156	-71.9236	0.85758	6.04084	Success	0.107045
1181	01_img90.jpg	Shampoo	321	413	448	170	-75.1906	0.868539	0.857491	Success	0.135999
1182	01_img90.jpg	LaptopClean	893	461	442	174	83.4241	0.534832	5.51617	Success	0.109001
1183	01_img91.jpg	Shampoo	333	701	448	170	-3.40887	0.911011	1.81834	Success	0.0639961
1184	01_img91.jpg	LaptopClean	909	445	442	174	-5.06179	0.858152	5.99191	Success	0.102997
1185	01_img92.jpg	Shampoo	941	397	448	170	80.2383	0.642739	15.4513	Success	0.104998
1186	01_img92.jpg	LaptopClean	445	573	442	174	-28.5841	0.861516	1.2124	Success	0.0999939
1187	01_img93.jpg	CokeBottle	285	429	576	202	27.407	0.791125	8.62659	Success	0.106
1188	01_img93.jpg	HandClean	816	560	392	214	-30.7998	0.684342	2.25178	Success	0.125999
1189	01_img94.jpg	CokeBottle	989	637	576	202	-22.8404	0.665316	10.8052	Success	0.098999
1190	01_img94.jpg	HandClean	333	397	392	214	-27.9861	0.82249	4.58155	Success	0.0995219
1191	01_img95.jpg	CokeBottle	925	653	576	202	-46.8337	0.613558	0.765285	Success	0.0830042
1192	01_img95.jpg	HandClean	237	509	392	214	52.2096	0.984757	0.167637	Success	0.109001
1193	01_img96.jpg	CokeBottle	941	413	576	202	-40.0202	0.875606	3.31539	Success	0.129002
1194	01_img96.jpg	HandClean	269	462	392	214	52.0487	0.734	10.3681	Success	0.107028
1195	01_img97.jpg	CokeBottle	291	541	576	202	-63.5258	0.647959	3.40653	Success	0.111005
1196	01_img97.jpg	HandClean	896	365	392	214	52.0874	0.905291	3.9199	Success	0.0820022
1197	01_img98.jpg	CokeBottle	317	413	576	202	82.0371	0.828919	0.969376	Success	0.128
1198	01_img98.jpg	HandClean	925	605	392	214	-45.4062	0.589464	32.0388	Fail	0.105
1199	01_img99.jpg	CokeBottle	477	461	576	202	-69.2851	0.598686	3.52383	Success	0.126004
1200	01_img99.jpg	HandClean	1021	451	392	214	53.4025	0.836968	5.70831	Success	0.107001
1201	02_img0.jpg	FruitKnife	973	365	440	256	-77.7201	0.910013	0.7621	Success	0.124979
1202	02_img0.jpg	GreenSoap	269	288	396	274	57.7742	0.864506	7.78564	Success	0.13707
1203	02_img0.jpg	Pepper	562	542	366	156	74.3867	0.667701	17.7008	Success	0.135999
1204	02_img1.jpg	FruitKnife	227	349	440	256	43.9004	0	38.4158	Fail	0.139002
1205	02_img1.jpg	GreenSoap	193	317	396	274	37.9937	0.741185	8.72671	Success	0.125047
1206	02_img1.jpg	Pepper	429	611	366	156	80.8604	0.82682	3.04905	Success	0.116026
1207	02_img10.jpg	FruitKnife	445	701	440	256	56.8258	0.902301	0.663311	Success	0.141516
1208	02_img10.jpg	GreenSoap	494	205	396	274	-51.1811	0.705565	8.84538	Success	0.120518
1209	02_img10.jpg	Pepper	931	531	366	156	-14.6193	0.710758	0.38063	Success	0.0795188
1210	02_img100.jpg	Shampoo	589	621	448	170	-29.1948	0	31.9075	Fail	0.0970027
1211	02_img100.jpg	PurpleMedicine	579	689	300	146	29.668	0.722991	15.6747	Success	0.0789967
1212	02_img100.jpg	DrillCover	1053	477	454	148	-18.7865	0.64241	0.824928	Success	0.0980003
1213	02_img101.jpg	Shampoo	622	637	448	170	-6.26234	0	46.2265	Fail	0.106999
1214	02_img101.jpg	PurpleMedicine	595	685	300	146	-24.2383	0.832904	0.0876102	Success	0.0849984
1215	02_img101.jpg	DrillCover	973	365	454	148	48.0195	0.527687	22.6984	Success	0.0940251
1216	02_img102.jpg	Shampoo	528	333	448	170	-36.1945	0.443125	8.35224	Success	0.100998
1217	02_img102.jpg	PurpleMedicine	317	626	300	146	-80.6192	0.634052	18.0237	Success	0.0750015
1218	02_img102.jpg	DrillCover	973	657	454	148	-40.5481	0.892747	0.11499	Success	0.104999
1219	02_img103.jpg	Shampoo	623	349	448	170	-6.392	0.814789	3.70472	Success	0.0809979
1220	02_img103.jpg	PurpleMedicine	320	659	300	146	-12.0403	0.853637	0.760846	Success	0.0789995
1221	02_img103.jpg	DrillCover	653	365	454	148	-5.72492	0	57.3231	Fail	0.116002
1222	02_img104.jpg	Shampoo	575	413	448	170	-47.7939	0.704641	2.90971	Success	0.0870004
1223	02_img104.jpg	PurpleMedicine	301	659	300	146	-19.9644	0.664302	14.0667	Success	0.0779996
1224	02_img104.jpg	DrillCover	1053	669	454	148	-52.6286	0.604384	0.891357	Success	0.111001
1225	02_img105.jpg	Shampoo	813	621	448	170	71.7204	0.26119	65.2633	Fail	0.114998
1226	02_img105.jpg	PurpleMedicine	259	496	300	146	-47.0079	0.827591	6.26419	Success	0.0779967
1227	02_img105.jpg	DrillCover	941	351	454	148	79.6801	0.413715	0.249184	Success	0.0960259
1228	02_img106.jpg	Shampoo	605	685	448	170	-5.94541	0.796155	9.43957	Success	0.107004
1229	02_img106.jpg	PurpleMedicine	704	669	300	146	-65.2999	0	53.2693	Fail	0.0899982
1230	02_img106.jpg	DrillCover	573	685	454	148	-2.1196	0	24.2356	Fail	0.102029
1231	02_img107.jpg	Shampoo	945	687	448	170	46.5871	0.631578	20.0474	Success	0.0790026
1232	02_img107.jpg	PurpleMedicine	770	240	300	146	-24.5419	0.832901	1.51718	Success	0.0670009
1233	02_img107.jpg	DrillCover	285	621	454	148	-10.294	0.970428	0.0124788	Success	0.0949996
1234	02_img108.jpg	Shampoo	925	577	448	170	78.057	0.660544	15.7005	Success	0.122005
1235	02_img108.jpg	PurpleMedicine	561	301	300	146	-46.2597	0.887612	0.676056	Success	0.0989988
1236	02_img108.jpg	DrillCover	223	589	454	148	-33.1558	0.911281	2.8191	Success	0.105999
1237	02_img109.jpg	Block	882	302	278	120	44.6444	0.720666	16.0977	Success	0.100005
1238	02_img109.jpg	GreenSoap	637	765	396	274	-38.1365	0.651112	3.80684	Success	0.108997
1239	02_img109.jpg	LaptopClean	269	227	442	174	-45.2785	0.936301	0.439903	Success	0.115001
1240	02_img11.jpg	FruitKnife	227	512	440	256	3.1275	0.818092	8.04401	Success	0.124998
1241	02_img11.jpg	GreenSoap	960	224	396	274	67.7575	0.693425	4.92782	Success	0.132
1242	02_img11.jpg	Pepper	765	621	366	156	-32.072	0.588222	7.30732	Success	0.112999
1243	02_img110.jpg	Block	1005	305	278	120	-35.3404	0.891776	3.54563	Success	0.089998
1244	02_img110.jpg	GreenSoap	621	685	396	274	12.0383	0.95595	1.39399	Success	0.0849981
1245	02_img110.jpg	LaptopClean	269	285	442	174	-10.1085	0.713189	8.89917	Success	0.0910027
1246	02_img111.jpg	Block	765	237	278	120	-20.2891	0.710952	16.9342	Success	0.077002
1247	02_img111.jpg	GreenSoap	365	653	396	274	68.2772	0.767704	0.887459	Success	0.115999
1248	02_img111.jpg	LaptopClean	878	653	442	174	43.3655	0.62975	20.1732	Success	0.102071
1249	02_img112.jpg	Block	707	239	278	120	-46.2207	0.839854	1.10431	Success	0.119999
1250	02_img112.jpg	GreenSoap	286	591	396	274	-67.9338	0.701922	0.616554	Success	0.122997
1251	02_img112.jpg	LaptopClean	925	624	442	174	-22.219	0.840411	2.11482	Success	0.101027
1252	02_img113.jpg	Block	573	237	278	120	12.0789	0.886946	0.593539	Success	0.0660007
1253	02_img113.jpg	GreenSoap	290	637	396	274	19.0302	0.863501	4.00844	Success	0.124998
1254	02_img113.jpg	LaptopClean	301	669	442	174	41.2626	0	4.84711	Fail	0.117026
1255	02_img114.jpg	Block	819	605	278	120	30.3518	0	76.0855	Fail	0.0710011
1256	02_img114.jpg	GreenSoap	301	605	396	274	63.4632	0.72056	3.50439	Success	0.104
1257	02_img114.jpg	LaptopClean	957	621	442	174	-3.30819	0.937652	1.09946	Success	0.0980244
1258	02_img115.jpg	Block	691	259	278	120	59.9484	0.85859	3.18427	Success	0.119
1259	02_img115.jpg	GreenSoap	269	509	396	274	-63.7748	0.722093	0.575371	Success	0.115007
1260	02_img115.jpg	LaptopClean	285	541	442	174	-63.3203	0	14.5249	Fail	0.110017
1261	02_img116.jpg	Block	989	286	278	120	12.7424	0.878986	5.36003	Success	0.0790019
1262	02_img116.jpg	GreenSoap	195	592	396	274	54.0524	0.576341	0.883247	Success	0.139998
1263	02_img116.jpg	LaptopClean	845	541	442	174	-40.3428	0.431271	5.44536	Success	0.098963
1264	02_img117.jpg	Block	195	669	278	120	60.1424	0.941658	1.90026	Success	0.104
1265	02_img117.jpg	GreenSoap	610	255	396	274	53.456	0.754157	13.7283	Success	0.111029
1266	02_img117.jpg	LaptopClean	989	701	442	174	-16.6258	0.893311	2.45657	Success	0.108
1267	02_img118.jpg	Block	381	669	278	120	-59.2355	0.842237	3.63326	Success	0.116002
1268	02_img118.jpg	GreenSoap	530	320	396	274	-17.4745	0.949459	1.01249	Success	0.101001
1269	02_img118.jpg	LaptopClean	493	349	442	174	-9.89829	0	72.3954	Fail	0.103001
1270	02_img119.jpg	Block	339	749	278	120	-32.2084	0.721038	15.336	Success	0.0760026
1271	02_img119.jpg	GreenSoap	576	273	396	274	44.213	0.795763	13.6837	Success	0.118007
1272	02_img119.jpg	LaptopClean	1053	685	442	174	-23.3128	0.788913	0.773115	Success	0.115028
1273	02_img12.jpg	FruitKnife	285	301	440	256	-34	0.70001	19.9019	Success	0.135003
1274	02_img12.jpg	GreenSoap	882	257	396	274	39.1494	0.829547	11.1536	Success	0.106003
1275	02_img12.jpg	Pepper	595	685	366	156	-79.7643	0.850682	1.92904	Success	0.093029
1276	02_img120.jpg	Block	334	691	278	120	-66.7604	0.873703	5.81949	Success	0.0939987
1277	02_img120.jpg	GreenSoap	608	258	396	274	67.9949	0.710765	1.19685	Success	0.122026
1278	02_img120.jpg	LaptopClean	605	291	442	174	82.9472	0	39.4999	Fail	0.124246
1279	02_img121.jpg	Block	371	339	278	120	59.5446	0.840607	4.07644	Success	0.0889778
1280	02_img121.jpg	GreenSoap	673	626	396	274	49.8999	0.886915	6.24727	Success	0.11603
1281	02_img121.jpg	LaptopClean	1005	365	442	174	-56.5633	0.746751	1.45486	Success	0.124046
1282	02_img122.jpg	Block	318	307	278	120	-18.4125	0.706558	17.1157	Success	0.0610189
1283	02_img122.jpg	GreenSoap	653	765	396	274	-54.7465	0.697481	3.37271	Success	0.0970213
1284	02_img122.jpg	LaptopClean	909	301	442	174	-6.04361	0.760376	0.789771	Success	0.0910203
1285	02_img123.jpg	Block	829	239	278	120	58.3356	0.729009	13.3829	Success	0.122
1286	02_img123.jpg	GreenSoap	365	530	396	274	-26.5006	0.838263	5.90092	Success	0.105998
1287	02_img123.jpg	LaptopClean	941	689	442	174	-24.607	0.915279	0.251402	Success	0.105026
1288	02_img124.jpg	Block	786	723	278	120	-63.8674	0.683484	1.73569	Success	0.118004
1289	02_img124.jpg	GreenSoap	977	333	396	274	-15.136	0.871647	1.02246	Success	0.113
1290	02_img124.jpg	LaptopClean	285	365	442	174	-15.4661	0.854529	1.74667	Success	0.0880017
1291	02_img125.jpg	Block	302	179	278	120	7.5309	0.87563	0.14756	Success	0.0640037
1292	02_img125.jpg	GreenSoap	481	625	396	274	70.9499	0.684217	8.67654	Success	0.120997
1293	02_img125.jpg	LaptopClean	336	253	442	174	-18.7257	0	89.2403	Fail	0.118005
1294	02_img126.jpg	Block	621	701	278	120	60.0319	0.864407	4.40614	Success	0.133999
1295	02_img126.jpg	GreenSoap	317	241	396	274	-26.769	0.943904	0.60269	Success	0.124006
1296	02_img126.jpg	LaptopClean	285	237	442	174	-18.9672	0	26.9562	Fail	0.124003
1297	02_img127.jpg	Block	611	702	278	120	-25.0891	0.743245	14.3852	Success	0.108999
1298	02_img127.jpg	GreenSoap	383	365	396	274	68.2127	0.659471	10.6282	Success	0.126
1299	02_img127.jpg	LaptopClean	381	385	442	174	75.073	0	13.0372	Fail	0.119
1300	02_img128.jpg	Block	499	654	278	120	45.7372	0.459737	1.07126	Success	0.127994
1301	02_img128.jpg	GreenSoap	339	291	396	274	-72.0291	0.720188	6.77596	Success	0.138998
1302	02_img128.jpg	LaptopClean	1053	589	442	174	-30.2496	0.684825	6.33474	Success	0.116999
1303	02_img129.jpg	GreenSoap	317	557	396	274	-56.634	0.890812	1.91082	Success	0.122001
1304	02_img129.jpg	Glue	765	717	488	230	69.4101	0.398728	30.0142	Fail	0.116
1305	02_img129.jpg	Pepper	765	221	366	156	-1.72624	0.760438	1.85355	Success	0.0629995
1306	02_img13.jpg	Block	755	227	278	120	45.3692	0.686921	17.3386	Success	0.0899959
1307	02_img13.jpg	PurpleMedicine	781	642	300	146	-50.7255	0.77405	6.68176	Success	0.0990016
1308	02_img13.jpg	SoftWash	256	525	390	264	58.8826	0.862266	2.91543	Success	0.13402
1309	02_img130.jpg	GreenSoap	317	317	396	274	60.4305	0.827527	10.2577	Success	0.115001
1310	02_img130.jpg	Glue	563	717	488	230	-77.3016	0.611107	9.95119	Success	0.137
1311	02_img130.jpg	Pepper	579	701	366	156	-70.3253	0	24.0822	Fail	0.10598
1312	02_img131.jpg	GreenSoap	493	304	396	274	-21.5989	0.935344	3.4386	Success	0.109001
1313	02_img131.jpg	Glue	349	717	488	230	-21.1275	0.934602	0.0970497	Success	0.112
1314	02_img131.jpg	Pepper	1005	546	366	156	-59.4203	0.856754	5.15685	Success	0.099999
1315	02_img132.jpg	GreenSoap	654	671	396	274	-67.3965	0.762896	3.17275	Success	0.130003
1316	02_img132.jpg	Glue	227	445	488	230	77.2122	0.716214	9.19559	Success	0.130004
1317	02_img132.jpg	Pepper	941	269	366	156	7.32841	0.75418	8.84423	Success	0.0790024
1318	02_img133.jpg	GreenSoap	637	686	396	274	60.8667	0.722516	8.5221	Success	0.116
1319	02_img133.jpg	Glue	227	285	488	230	71.3515	0.646728	12.7117	Success	0.130999
1320	02_img133.jpg	Pepper	973	301	366	156	-7.11563	0.87275	0.828619	Success	0.0880291
1321	02_img134.jpg	GreenSoap	639	675	396	274	-62.8346	0.819129	4.14863	Success	0.156002
1322	02_img134.jpg	Glue	349	413	488	230	-59.2558	0.206398	10.5599	Fail	0.14406
1323	02_img134.jpg	Pepper	973	285	366	156	-44.8421	0.827522	5.03706	Success	0.114975
1324	02_img135.jpg	GreenSoap	642	688	396	274	-37.6572	0.894161	1.9753	Success	0.107002
1325	02_img135.jpg	Glue	224	333	488	230	-19.9674	0.797508	0.483936	Success	0.128001
1326	02_img135.jpg	Pepper	957	317	366	156	77.7573	0.654659	10.5392	Success	0.106998
1327	02_img136.jpg	GreenSoap	669	626	396	274	68.635	0.716467	3.74282	Success	0.119002
1328	02_img136.jpg	Glue	333	317	488	230	-80.5298	0.598844	11.1025	Success	0.137005
1329	02_img136.jpg	Pepper	1005	291	366	156	82.3404	0.897662	0.488571	Success	0.0889997
1330	02_img137.jpg	GreenSoap	637	301	396	274	-46.0748	0.828813	10.0165	Success	0.105996
1331	02_img137.jpg	Glue	225	605	488	230	-11.287	0.619669	0.726979	Success	0.113002
1332	02_img137.jpg	Pepper	957	675	366	156	-23.4475	0.880682	0.349102	Success	0.0810018
1333	02_img138.jpg	GreenSoap	674	253	396	274	19.1962	0.865041	8.80513	Success	0.094002
1334	02_img138.jpg	Glue	669	227	488	230	24.663	0	35.5754	Fail	0.133
1335	02_img138.jpg	Pepper	925	672	366	156	-24.7557	0.837405	3.3891	Success	0.0890009
1336	02_img139.jpg	GreenSoap	691	273	396	274	-71.6553	0.683036	6.48867	Success	0.115002
1337	02_img139.jpg	Glue	301	607	488	230	-29.2408	0.912886	3.04758	Success	0.121001
1338	02_img139.jpg	Pepper	941	686	366	156	-7.20451	0.86173	3.81025	Success	0.0860009
1339	02_img14.jpg	Block	877	509	278	120	-38.1526	0.782416	10.3162	Success	0.0770016
1340	02_img14.jpg	PurpleMedicine	430	717	300	146	-20.0539	0.921088	3.37713	Success	0.0620005
1341	02_img14.jpg	SoftWash	339	351	390	264	32.1882	0.803394	11.0096	Success	0.112
1342	02_img140.jpg	GreenSoap	656	685	396	274	66.8995	0.928125	2.97372	Success	0.123001
1343	02_img140.jpg	Glue	227	317	488	230	47.9998	0.643742	22.6786	Success	0.142004
1344	02_img140.jpg	Pepper	893	254	366	156	-18.0527	0.831715	2.94406	Success	0.113973
1345	02_img141.jpg	GreenSoap	301	687	396	274	26.7142	0.876479	7.85683	Success	0.104998
1346	02_img141.jpg	Glue	909	541	488	230	-78.7525	0.519335	9.89211	Success	0.124
1347	02_img141.jpg	Pepper	627	257	366	156	-80.8779	0.769258	6.52879	Success	0.0950012
1348	02_img142.jpg	GreenSoap	221	653	396	274	68.9011	0.695134	14.4201	Success	0.126011
1349	02_img142.jpg	Glue	909	717	488	230	-33.246	0.603719	1.54791	Success	0.138999
1350	02_img142.jpg	Pepper	641	205	366	156	78.7959	0.709582	9.8202	Success	0.0999985
1351	02_img143.jpg	GreenSoap	286	365	396	274	62.9561	0.734927	0.544365	Success	0.120998
1352	02_img143.jpg	Glue	877	301	488	230	32.3156	0.61152	16.0876	Success	0.123996
1353	02_img143.jpg	Pepper	701	701	366	156	13.5006	0.796837	2.09339	Success	0.0840032
1354	02_img144.jpg	PaperKnife	861	365	532	146	-27.0769	0.633219	5.31378	Success	0.122015
1355	02_img144.jpg	GreenSoap	255	429	396	274	64.1	0.736431	9.00429	Success	0.137028
1356	02_img144.jpg	Block	621	733	278	120	67.9389	0.697329	2.91918	Success	0.117363
1357	02_img145.jpg	PaperKnife	909	623	532	146	32.1773	0.595785	12.8865	Success	0.0809844
1358	02_img145.jpg	GreenSoap	605	272	396	274	66.0424	0.82561	5.57225	Success	0.108003
1359	02_img145.jpg	Block	301	656	278	120	-40.1214	0.754011	11.0441	Success	0.081003
1360	02_img146.jpg	PaperKnife	749	685	532	146	-74.17	0	22.9433	Fail	0.108001
1361	02_img146.jpg	GreenSoap	816	669	396	274	-69.7244	0.753661	4.34737	Success	0.133999
1362	02_img146.jpg	Block	1027	253	278	120	67.3679	0.839225	2.38962	Success	0.113029
1363	02_img147.jpg	PaperKnife	269	685	532	146	-22.9644	0.710907	1.23049	Success	0.0865247
1364	02_img147.jpg	GreenSoap	479	339	396	274	66.8621	0.7367	2.32435	Success	0.117994
1365	02_img147.jpg	Block	909	531	278	120	46.9071	0.691146	16.3893	Success	0.0850699
1366	02_img148.jpg	PaperKnife	829	366	532	146	83.0515	0	2.20978	Fail	0.108001
1367	02_img148.jpg	GreenSoap	797	653	396	274	-61.5542	0.775148	6.27117	Success	0.106
1368	02_img148.jpg	Block	819	221	278	120	7.68296	0.66378	2.00998	Success	0.0769992
1369	02_img149.jpg	PaperKnife	573	317	532	146	-10.6657	0.197706	18.7045	Fail	0.102
1370	02_img149.jpg	GreenSoap	338	685	396	274	31.351	0.829198	12.0852	Success	0.111004
1371	02_img149.jpg	Block	909	574	278	120	52.2439	0.721473	13.2943	Success	0.0960014
1372	02_img15.jpg	Block	637	659	278	120	61.2428	0.742643	4.77821	Success	0.125004
1373	02_img15.jpg	PurpleMedicine	222	499	300	146	80.1578	0.678327	11.8489	Success	0.0990009
1374	02_img15.jpg	SoftWash	557	195	390	264	-29.8565	0.851493	0.408009	Success	0.108001
1375	02_img150.jpg	PaperKnife	861	381	532	146	-34.9672	0.172378	68.9472	Fail	0.113004
1376	02_img150.jpg	GreenSoap	290	557	396	274	68.7527	0.76002	3.83114	Success	0.123002
1377	02_img150.jpg	Block	829	627	278	120	-33.6773	0.782232	11.2353	Success	0.0800016
1378	02_img151.jpg	PaperKnife	349	397	532	146	-13.6726	0.37946	1.93054	Success	0.104002
1379	02_img151.jpg	GreenSoap	929	573	396	274	-15.0036	0.899159	3.64141	Success	0.0919976
1380	02_img151.jpg	Block	413	701	278	120	12.823	0.836717	5.54631	Success	0.0790026
1381	02_img152.jpg	Xisat	429	541	526	144	72.8348	0	12.7651	Fail	0.123001
1382	02_img152.jpg	Shampoo	381	557	448	170	-74.7421	0	33.4587	Fail	0.118997
1383	02_img152.jpg	Glue	365	557	488	230	-68.2548	0.59624	8.29902	Success	0.126999
1384	02_img153.jpg	Xisat	445	525	526	144	71.5792	0.118217	40.4892	Fail	0.112999
1385	02_img153.jpg	Shampoo	333	413	448	170	-81.8309	0.589533	4.96319	Success	0.122
1386	02_img153.jpg	Glue	845	269	488	230	-47.8966	0.477842	5.79742	Success	0.15507
1387	02_img154.jpg	Xisat	397	589	526	144	-19.6259	0.212479	35.9314	Fail	0.0800016
1388	02_img154.jpg	Shampoo	445	285	448	170	20.4531	0.650288	5.85362	Success	0.0930018
1389	02_img154.jpg	Glue	958	461	488	230	80.4737	0.592	3.48262	Success	0.129004
1390	02_img155.jpg	Xisat	365	253	526	144	-26.5934	0	56.6763	Fail	0.10698
1391	02_img155.jpg	Shampoo	414	227	448	170	-9.71385	0.558296	4.21366	Success	0.0889995
1392	02_img155.jpg	Glue	301	653	488	230	-16.6018	0.662139	1.36911	Success	0.130001
1393	02_img156.jpg	Xisat	845	349	526	144	14.2525	0.188544	1.42439	Fail	0.113
1394	02_img156.jpg	Shampoo	370	307	448	170	-28.7259	0.659856	9.02905	Success	0.122025
1395	02_img156.jpg	Glue	669	717	488	230	-18.1861	0.515891	0.355778	Success	0.149215
1396	02_img157.jpg	Pepper	173	477	366	156	80.2049	0.690831	6.91736	Success	0.0949764
1397	02_img157.jpg	RedMedicine	753	259	324	142	-22.2039	0.856843	5.27229	Success	0.0759988
1398	02_img157.jpg	HandClean	653	627	392	214	45.7431	0.675963	14.8867	Success	0.101999
1399	02_img158.jpg	Pepper	269	237	366	156	-36.0038	0.669515	8.24913	Success	0.106001
1400	02_img158.jpg	RedMedicine	912	381	324	142	-25.0585	0.804461	3.60985	Success	0.0909991
1401	02_img158.jpg	HandClean	557	673	392	214	52.4292	0.850243	7.29589	Success	0.125001
1402	02_img159.jpg	Pepper	159	557	366	156	-41.2175	0.483471	3.11895	Success	0.134003
1403	02_img159.jpg	RedMedicine	1021	301	324	142	62.0226	0.640656	22.1464	Success	0.109012
1404	02_img159.jpg	HandClean	605	637	392	214	-28.4779	0.762377	4.38589	Success	0.116029
1405	02_img16.jpg	Block	589	611	278	120	-14.0435	0.760643	12.1426	Success	0.0489964
1406	02_img16.jpg	PurpleMedicine	384	333	300	146	-43.3489	0.850471	5.97763	Success	0.0739946
1407	02_img16.jpg	SoftWash	893	322	390	264	9.82117	0.879576	7.6632	Success	0.0939963
1408	02_img160.jpg	Pepper	413	658	366	156	33.2624	0.646927	13.7908	Success	0.118
1409	02_img160.jpg	RedMedicine	989	525	324	142	-74.8408	0.670087	1.83002	Success	0.0970001
1410	02_img160.jpg	HandClean	531	269	392	214	39.7392	0.749221	15.7242	Success	0.124024
1411	02_img161.jpg	Pepper	241	625	366	156	80.9409	0.662682	7.65327	Success	0.111004
1412	02_img161.jpg	RedMedicine	1005	285	324	142	32.7682	0.700352	15.675	Success	0.098016
1413	02_img161.jpg	HandClean	669	499	392	214	49.1379	0.404806	12.8937	Success	0.126051
1414	02_img162.jpg	Pepper	497	226	366	156	-80.6009	0.79548	8.69591	Success	0.100998
1415	02_img162.jpg	RedMedicine	525	733	324	142	79.5305	0.71326	9.44282	Success	0.0979984
1416	02_img162.jpg	HandClean	943	397	392	214	53.1832	0.86339	1.29028	Success	0.112025
1417	02_img163.jpg	Pepper	258	526	366	156	-72.1835	0.376102	1.43785	Success	0.101005
1418	02_img163.jpg	RedMedicine	624	701	324	142	-23.2471	0.901244	2.8529	Success	0.0700033
1419	02_img163.jpg	HandClean	866	301	392	214	-32.3873	0.779143	10.1926	Success	0.0980051
1420	02_img164.jpg	Pepper	317	653	366	156	80.9523	0.675977	2.16803	Success	0.0930033
1421	02_img164.jpg	RedMedicine	898	611	324	142	-31.8619	0.88581	1.39244	Success	0.0815139
1422	02_img164.jpg	HandClean	845	241	392	214	-29.442	0.689745	0.152853	Success	0.127134
1423	02_img165.jpg	Pepper	941	221	366	156	-44.6262	0.62672	6.59604	Success	0.150999
1424	02_img165.jpg	RedMedicine	717	701	324	142	-75.476	0.843481	2.17113	Success	0.114998
1425	02_img165.jpg	HandClean	381	447	392	214	51.2951	0.651616	5.61018	Success	0.124002
1426	02_img166.jpg	Pepper	989	336	366	156	80.9522	0.818773	7.6646	Success	0.157002
1427	02_img166.jpg	RedMedicine	722	643	324	142	-23.5717	0.845495	3.06314	Success	0.1
1428	02_img166.jpg	HandClean	259	429	392	214	51.7601	0.690728	7.17487	Success	0.133002
1429	02_img167.jpg	Pepper	205	333	366	156	-33.2698	0.688774	3.94657	Success	0.163001
1430	02_img167.jpg	RedMedicine	941	221	324	142	62.8897	0.616129	24.7963	Success	0.103998
1431	02_img167.jpg	HandClean	685	622	392	214	-33.5826	0.736946	13.1988	Success	0.119998
1432	02_img168.jpg	Pepper	960	269	366	156	-24.2988	0.850428	5.43452	Success	0.100002
1433	02_img168.jpg	RedMedicine	237	419	324	142	80.683	0.723976	5.03343	Success	0.0949988
1434	02_img168.jpg	HandClean	658	626	392	214	-41.3687	0.550313	35.8638	Fail	0.130032
1435	02_img169.jpg	Pepper	611	670	366	156	-31.0025	0.802273	3.29702	Success	0.0939989
1436	02_img169.jpg	RedMedicine	893	349	324	142	-64.4739	0.738619	1.3629	Success	0.088999
1437	02_img169.jpg	HandClean	195	445	392	214	-34.3041	0.62448	21.9398	Success	0.122
1438	02_img17.jpg	Block	592	685	278	120	54.6559	0.668961	11.5506	Success	0.108
1439	02_img17.jpg	PurpleMedicine	349	349	300	146	-27.6694	0.842498	7.7949	Success	0.0909989
1440	02_img17.jpg	SoftWash	1023	589	390	264	66.1685	0.865732	1.33398	Success	0.157029
1441	02_img170.jpg	Pepper	477	658	366	156	-80.5674	0.768765	5.51294	Success	0.104007
1442	02_img170.jpg	RedMedicine	947	541	324	142	68.8864	0.6804	19.6959	Success	0.101999
1443	02_img170.jpg	HandClean	462	253	392	214	-29.4197	0.737037	5.2063	Success	0.125027
1444	02_img171.jpg	Pepper	253	349	366	156	-77.872	0.713755	0.916359	Success	0.100001
1445	02_img171.jpg	RedMedicine	749	717	324	142	82.1643	0.685296	1.48956	Success	0.076
1446	02_img171.jpg	HandClean	911	239	392	214	-39.1634	0.727146	15.0793	Success	0.099999
1447	02_img172.jpg	Pepper	349	625	366	156	-18.1256	0	57.4408	Fail	0.104001
1448	02_img172.jpg	RedMedicine	387	640	324	142	-21.0218	0.884821	4.09011	Success	0.0849993
1449	02_img172.jpg	HandClean	867	400	392	214	-30.2017	0.672854	0.657681	Success	0.117003
1450	02_img173.jpg	Pepper	461	627	366	156	-80.6913	0	24.8633	Fail	0.110002
1451	02_img173.jpg	RedMedicine	462	637	324	142	-80.5825	0.863683	5.85347	Success	0.103666
1452	02_img173.jpg	HandClean	926	510	392	214	52.6849	0.66843	15.1602	Success	0.110038
1453	02_img174.jpg	Pepper	531	685	366	156	-78.6132	0.501024	1.93012	Success	0.113998
1454	02_img174.jpg	RedMedicine	285	355	324	142	-81.2784	0.815378	6.7174	Success	0.083998
1455	02_img174.jpg	HandClean	893	349	392	214	-45.5889	0.540153	36.97	Fail	0.110137
1456	02_img175.jpg	O2	509	272	438	184	-3.19623	0.70923	2.082	Success	0.0999925
1457	02_img175.jpg	Glue	303	589	488	230	-2.17484	0.515844	0.94675	Success	0.133999
1458	02_img175.jpg	Pepper	433	253	366	156	-0.528971	0	68.7734	Fail	0.11032
1459	02_img176.jpg	O2	269	578	438	184	-76.6314	0	39.5216	Fail	0.10061
1460	02_img176.jpg	Glue	269	589	488	230	-77.0007	0.597012	9.40173	Success	0.13407
1461	02_img176.jpg	Pepper	797	659	366	156	-29.6917	0.61447	0.657761	Success	0.0980532
1462	02_img177.jpg	O2	861	333	438	184	-69.2201	0.497521	5.07533	Success	0.103999
1463	02_img177.jpg	Glue	227	717	488	230	-27.4893	0.565192	6.68746	Success	0.156
1464	02_img177.jpg	Pepper	351	253	366	156	-78.4534	0.717546	4.68109	Success	0.0969994
1465	02_img178.jpg	O2	797	481	438	184	65.7248	0	14.8625	Fail	0.110004
1466	02_img178.jpg	Glue	227	477	488	230	-52.1372	0.659111	10.9213	Success	0.157026
1467	02_img178.jpg	Pepper	701	558	366	156	-21.7571	0.659866	1.63169	Success	0.110046
1468	02_img179.jpg	O2	445	733	438	184	-2.99402	0	65.62	Fail	0.120004
1469	02_img179.jpg	Glue	445	717	488	230	-1.53072	0.725488	0.844708	Success	0.137001
1470	02_img179.jpg	Pepper	515	317	366	156	-78.9037	0.757859	2.66447	Success	0.11403
1471	02_img18.jpg	Block	610	323	278	120	-34.5039	0.778939	10.56	Success	0.088001
1472	02_img18.jpg	PurpleMedicine	225	563	300	146	83.0199	0.742548	8.16311	Success	0.0779982
1473	02_img18.jpg	SoftWash	829	657	390	264	-22.3341	0.884895	2.02726	Success	0.133025
1474	02_img180.jpg	O2	877	525	438	184	-67.8419	0.452917	2.98438	Success	0.114891
1475	02_img180.jpg	Glue	495	717	488	230	-48.6444	0.588025	3.47129	Success	0.155997
1476	02_img180.jpg	Pepper	541	221	366	156	-78.656	0.888981	4.11475	Success	0.121991
1477	02_img181.jpg	O2	928	608	438	184	-9.90429	0.902649	1.82438	Success	0.103001
1478	02_img181.jpg	Glue	381	557	488	230	-16.4877	0.836058	1.64657	Success	0.115999
1479	02_img181.jpg	Pepper	547	221	366	156	31.2842	0.699844	16.3027	Success	0.0890017
1480	02_img182.jpg	O2	945	227	438	184	-7.60801	0.918651	1.92684	Success	0.0980008
1481	02_img182.jpg	Glue	685	701	488	230	-9.51407	0.878154	5.46068	Success	0.0900013
1482	02_img182.jpg	Pepper	368	163	366	156	-3.87919	0.875001	4.53137	Success	0.0839994
1483	02_img183.jpg	O2	369	227	438	184	-10.1144	0	75.8417	Fail	0.093003
1484	02_img183.jpg	Glue	589	717	488	230	-39.5785	0.57359	2.28006	Success	0.150055
1485	02_img183.jpg	Pepper	381	205	366	156	-9.96867	0.93232	1.24533	Success	0.0819969
1486	02_img184.jpg	O2	656	557	438	184	-25.6503	0.746193	2.48812	Success	0.097003
1487	02_img184.jpg	Glue	227	637	488	230	77.841	0.626792	7.57361	Success	0.131999
1488	02_img184.jpg	Pepper	993	384	366	156	-81.1373	0.649537	5.50249	Success	0.0900004
1489	02_img185.jpg	O2	845	605	438	184	-32.5207	0.786439	7.40519	Success	0.114002
1490	02_img185.jpg	Glue	365	477	488	230	-63.7309	0.32636	0.528908	Success	0.16103
1491	02_img185.jpg	Pepper	637	192	366	156	-5.87032	0.717387	8.06556	Success	0.103971
1492	02_img186.jpg	PurpleMedicine	417	707	300	146	81.044	0.663165	0.73558	Success	0.0980017
1493	02_img186.jpg	PaperKnife	925	446	532	146	-34.6888	0.868397	2.21463	Success	0.130028
1494	02_img186.jpg	Block	429	657	278	120	72.3605	0	36.1258	Fail	0.111005
1495	02_img187.jpg	PurpleMedicine	195	563	300	146	-36.0347	0.772054	5.30365	Success	0.115
1496	02_img187.jpg	PaperKnife	829	589	532	146	74.4092	0.323051	31.8164	Fail	0.131937
1497	02_img187.jpg	Block	510	253	278	120	-65.6283	0.796136	5.23037	Success	0.110999
1498	02_img188.jpg	PurpleMedicine	557	189	300	146	-20.5292	0.825401	0.239956	Success	0.0620012
1499	02_img188.jpg	PaperKnife	669	429	532	146	82.7735	0	17.2354	Fail	0.103
1500	02_img188.jpg	Block	449	595	278	120	-72.9032	0.756336	12.0369	Success	0.069001
1501	02_img189.jpg	PurpleMedicine	510	254	300	146	-37.5426	0.794295	0.211075	Success	0.104001
1502	02_img189.jpg	PaperKnife	877	493	532	146	79.6462	0.487882	7.29982	Success	0.138031
1503	02_img189.jpg	Block	301	611	278	120	-44.6614	0.811128	3.91174	Success	0.125972
1504	02_img19.jpg	Block	317	785	278	120	-31.2286	0.679739	1.10327	Success	0.0810041
1505	02_img19.jpg	PurpleMedicine	701	637	300	146	-38.0511	0.605135	7.69832	Success	0.0970018
1506	02_img19.jpg	SoftWash	801	285	390	264	-9.33355	0.891795	2.31596	Success	0.124003
1507	02_img190.jpg	PurpleMedicine	259	269	300	146	-15.5394	0.801863	9.93849	Success	0.0850003
1508	02_img190.jpg	PaperKnife	259	301	532	146	15.4517	0	88.1075	Fail	0.129025
1509	02_img190.jpg	Block	301	269	278	120	-8.67206	0	60.6982	Fail	0.110028
1510	02_img191.jpg	PaperKnife	413	541	532	146	-23.9163	0	76.5757	Fail	0.112005
1511	02_img191.jpg	SmallMedicine	253	305	260	158	-64.7371	0.68907	0.611793	Success	0.0930035
1512	02_img191.jpg	FruitKnife	445	656	440	256	53.0168	0.884201	2.8698	Success	0.131
1513	02_img192.jpg	Pepper	751	691	366	156	-9.5363	0.814941	2.40443	Success	0.0830021
1514	02_img192.jpg	Block	717	690	278	120	-20.5666	0	80.9185	Fail	0.103004
1515	02_img192.jpg	T1	349	334	432	114	-22.852	0.849004	0.402863	Success	0.110032
1516	02_img193.jpg	Pepper	771	653	366	156	82.1126	0.819812	0.269348	Success	0.0960035
1517	02_img193.jpg	Block	781	707	278	120	68.1629	0	81.3156	Fail	0.104975
1518	02_img193.jpg	T1	339	352	432	114	83.3732	0.703432	1.73759	Success	0.0889993
1519	02_img194.jpg	Pepper	371	305	366	156	-58.4512	0.89964	0.459755	Success	0.136002
1520	02_img194.jpg	Block	941	253	278	120	-39.603	0.647662	0.755528	Success	0.107
1521	02_img194.jpg	T1	767	670	432	114	-19.6503	0.785525	0.12179	Success	0.0890007
1522	02_img195.jpg	Pepper	544	642	366	156	-71.3966	0.768114	2.43836	Success	0.0870008
1523	02_img195.jpg	Block	253	273	278	120	64.4812	0.794575	0.824608	Success	0.0980024
1524	02_img195.jpg	T1	877	333	432	114	-24.6261	0.717005	1.04965	Success	0.0819981
1525	02_img196.jpg	Pepper	557	637	366	156	-64.9448	0.769502	2.16733	Success	0.103999
1526	02_img196.jpg	Block	303	285	278	120	68.4546	0.658831	7.21178	Success	0.114996
1527	02_img196.jpg	T1	915	381	432	114	-77.0373	0.820593	2.31674	Success	0.12103
1528	02_img197.jpg	Pepper	899	302	366	156	-78.4718	0.740191	1.11452	Success	0.105003
1529	02_img197.jpg	Block	573	659	278	120	13.2926	0.897026	0.0651836	Success	0.081001
1530	02_img197.jpg	T1	285	319	432	114	-48.7693	0.850803	3.01239	Success	0.100024
1531	02_img198.jpg	Pepper	370	366	366	156	-74.5864	0.920925	3.0525	Success	0.113002
1532	02_img198.jpg	Block	975	285	278	120	66.9849	0.792341	0.624069	Success	0.112003
1533	02_img198.jpg	T1	765	669	432	114	-58.6133	0.804992	2.58274	Success	0.104003
1534	02_img199.jpg	Pepper	365	416	366	156	-58.9156	0.474935	7.09116	Success	0.111
1535	02_img199.jpg	Block	945	290	278	120	-59.9428	0.897467	1.08594	Success	0.138002
1536	02_img199.jpg	T1	669	669	432	114	-23.2196	0.881454	1.54047	Success	0.102031
1537	02_img2.jpg	FruitKnife	511	610	440	256	54.7073	0.762614	15.2839	Success	0.162997
1538	02_img2.jpg	GreenSoap	989	483	396	274	32.2388	0.867931	7.22369	Success	0.124048
1539	02_img2.jpg	Pepper	349	257	366	156	-11.273	0.807797	4.59974	Success	0.0920005
1540	02_img20.jpg	Block	499	323	278	120	-16.634	0.771861	12.1208	Success	0.0530069
1541	02_img20.jpg	PurpleMedicine	899	611	300	146	-80.287	0.734879	9.105	Success	0.0779781
1542	02_img20.jpg	SoftWash	290	621	390	264	37.7325	0.756148	15.5804	Success	0.113
1543	02_img21.jpg	Block	861	690	278	120	-47.237	0.748204	10.5548	Success	0.106003
1544	02_img21.jpg	PurpleMedicine	381	528	300	146	80.69	0.674728	13.4671	Success	0.106001
1545	02_img21.jpg	SoftWash	914	305	390	264	-23.1486	0.8463	7.66244	Success	0.121001
1546	02_img22.jpg	Block	397	734	278	120	-41.4941	0.707966	13.487	Success	0.0860026
1547	02_img22.jpg	PurpleMedicine	467	400	300	146	-74.8392	0.791021	0.724564	Success	0.102003
1548	02_img22.jpg	SoftWash	929	653	390	264	15.2609	0.927394	3.66671	Success	0.15101
1549	02_img23.jpg	Block	637	685	278	120	62.288	0.491885	0.653248	Success	0.0849984
1550	02_img23.jpg	PurpleMedicine	947	429	300	146	-17.6509	0.880921	3.89514	Success	0.0690019
1551	02_img23.jpg	SoftWash	429	381	390	264	-59.2399	0.768599	16.7092	Success	0.135999
1552	02_img24.jpg	Block	493	275	278	120	62.282	0.856041	6.09713	Success	0.164003
1553	02_img24.jpg	PurpleMedicine	419	623	300	146	-39.8584	0.556553	8.11512	Success	0.120001
1554	02_img24.jpg	SoftWash	914	477	390	264	-28.6906	0.805586	14.2811	Success	0.155001
1555	02_img25.jpg	Block	366	493	278	120	70.9028	0.770424	10.5707	Success	0.105003
1556	02_img25.jpg	PurpleMedicine	893	349	300	146	-17.3433	0.813582	7.77406	Success	0.118997
1557	02_img25.jpg	SoftWash	883	718	390	264	-23.4929	0.904355	2.68469	Success	0.128999
1558	02_img26.jpg	Block	285	398	278	120	9.45779	0.872629	1.51238	Success	0.11
1559	02_img26.jpg	PurpleMedicine	1101	563	300	146	81.7423	0.638217	8.9994	Success	0.105001
1560	02_img26.jpg	SoftWash	643	627	390	264	67.2636	0.7886	7.94672	Success	0.147005
1561	02_img27.jpg	Block	253	669	278	120	72.3976	0	52.3377	Fail	0.0900002
1562	02_img27.jpg	PurpleMedicine	1005	685	300	146	-3.12844	0.913602	0.28702	Success	0.0709975
1563	02_img27.jpg	SoftWash	381	657	390	264	-10.2204	0.902932	5.84526	Success	0.113027
1564	02_img28.jpg	Block	1069	529	278	120	-56.6466	0.684483	1.00275	Success	0.124
1565	02_img28.jpg	PurpleMedicine	627	675	300	146	71.1563	0.547225	31.6551	Fail	0.109
1566	02_img28.jpg	SoftWash	253	434	390	264	67.8293	0.901206	5.87032	Success	0.174029
1567	02_img29.jpg	Block	605	403	278	120	63.8145	0.646089	9.10254	Success	0.123001
1568	02_img29.jpg	PurpleMedicine	253	621	300	146	69.581	0.580159	31.7674	Fail	0.0880008
1569	02_img29.jpg	SoftWash	829	589	390	264	67.0654	0.764136	1.03459	Success	0.166033
1570	02_img3.jpg	FruitKnife	397	733	440	256	-54.6731	0.525835	2.84403	Success	0.160997
1571	02_img3.jpg	GreenSoap	909	626	396	274	-66.7056	0.738371	14.3912	Success	0.139031
1572	02_img3.jpg	Pepper	512	189	366	156	-77.0196	0.631577	0.498932	Success	0.0979931
1573	02_img30.jpg	Block	355	339	278	120	-21.0331	0.703119	17.5291	Success	0.0539987
1574	02_img30.jpg	PurpleMedicine	163	687	300	146	-26.2033	0.820809	6.74207	Success	0.0780013
1575	02_img30.jpg	SoftWash	717	605	390	264	-10.371	0.903171	0.126011	Success	0.122001
1576	02_img31.jpg	Block	494	704	278	120	17.2275	0.792493	6.69044	Success	0.0840046
1577	02_img31.jpg	PurpleMedicine	446	349	300	146	-22.5426	0.762711	9.92349	Success	0.111005
1578	02_img31.jpg	SoftWash	929	499	390	264	-6.06	0.833064	11.3872	Success	0.122004
1579	02_img32.jpg	Block	403	461	278	120	13.7069	0.89421	3.84664	Success	0.0999959
1580	02_img32.jpg	PurpleMedicine	867	290	300	146	-12.3197	0.762815	8.3812	Success	0.0989959
1581	02_img32.jpg	SoftWash	898	685	390	264	-17.4917	0.900732	4.88999	Success	0.130773
1582	02_img33.jpg	Block	467	637	278	120	-35.484	0.832948	8.18191	Success	0.075999
1583	02_img33.jpg	PurpleMedicine	1069	685	300	146	-0.45024	0.848111	4.36902	Success	0.0669982
1584	02_img33.jpg	SoftWash	881	320	390	264	-25.2754	0.766748	18.5687	Success	0.135123
1585	02_img34.jpg	Block	211	673	278	120	27.8177	0.730905	12.5671	Success	0.108
1586	02_img34.jpg	PurpleMedicine	813	623	300	146	-71.8334	0.745636	6.90753	Success	0.111027
1587	02_img34.jpg	SoftWash	381	337	390	264	33.4798	0.824505	11.4964	Success	0.159045
1588	02_img35.jpg	Block	477	483	278	120	12.394	0.854038	4.93975	Success	0.0650034
1589	02_img35.jpg	PurpleMedicine	846	355	300	146	-76.9092	0.723869	3.0729	Success	0.093997
1590	02_img35.jpg	SoftWash	1005	690	390	264	42.8356	0.712841	26.9034	Success	0.158042
1591	02_img36.jpg	Block	752	253	278	120	-23.9321	0.691315	11.1876	Success	0.0850008
1592	02_img36.jpg	PurpleMedicine	323	493	300	146	-63.4318	0.706137	3.11106	Success	0.0980062
1593	02_img36.jpg	SoftWash	781	701	390	264	-17.3668	0.786712	10.6015	Success	0.124995
1594	02_img37.jpg	Block	909	541	278	120	-32.1088	0.739705	13.3622	Success	0.079
1595	02_img37.jpg	PurpleMedicine	477	285	300	146	-79.1372	0.699836	10.1842	Success	0.097995
1596	02_img37.jpg	SoftWash	381	685	390	264	42.1567	0.817019	9.15019	Success	0.143026
1597	02_img38.jpg	Block	925	685	278	120	67.4002	0.913422	0.605087	Success	0.101996
1598	02_img38.jpg	PurpleMedicine	669	269	300	146	-25.2957	0.691731	12.649	Success	0.103999
1599	02_img38.jpg	SoftWash	333	575	390	264	-68.7362	0.779617	16.3741	Success	0.170002
1600	02_img39.jpg	Block	307	515	278	120	34.3036	0.759253	11.786	Success	0.0910068
1601	02_img39.jpg	PurpleMedicine	736	353	300	146	52.454	0.594722	30.4666	Fail	0.0799747
1602	02_img39.jpg	SoftWash	941	653	390	264	-18.7827	0.849786	3.13709	Success	0.110001
1603	02_img4.jpg	FruitKnife	289	477	440	256	-42.7198	0.693034	4.86322	Success	0.180018
1604	02_img4.jpg	GreenSoap	973	285	396	274	-25.408	0.878872	0.887127	Success	0.12507
1605	02_img4.jpg	Pepper	803	638	366	156	-66.7173	0.690408	2.13464	Success	0.128
1606	02_img40.jpg	Block	755	301	278	120	-15.9859	0	42.8951	Fail	0.0949993
1607	02_img40.jpg	PurpleMedicine	813	285	300	146	13.3757	0.845376	6.0317	Success	0.0810003
1608	02_img40.jpg	SoftWash	258	717	390	264	67.5488	0.904488	2.30981	Success	0.16503
1609	02_img41.jpg	Block	339	653	278	120	44.1894	0.742141	12.6976	Success	0.0950048
1610	02_img41.jpg	PurpleMedicine	1025	573	300	146	-11.0478	0.905067	0.684678	Success	0.0859981
1611	02_img41.jpg	SoftWash	544	336	390	264	-13.6174	0.809932	13.625	Success	0.153072
1612	02_img42.jpg	Block	511	270	278	120	58.9542	0.758888	9.79845	Success	0.104001
1613	02_img42.jpg	PurpleMedicine	333	723	300	146	-66.0141	0.835079	3.18545	Success	0.0840003
1614	02_img42.jpg	SoftWash	941	653	390	264	60.3999	0.860706	1.29943	Success	0.134
1615	02_img43.jpg	Block	211	579	278	120	70.1943	0.822131	7.20832	Success	0.0929995
1616	02_img43.jpg	PurpleMedicine	575	653	300	146	-64.2072	0.485988	2.992	Success	0.110997
1617	02_img43.jpg	SoftWash	867	369	390	264	-17.5622	0.78713	14.214	Success	0.138026
1618	02_img44.jpg	Block	957	781	278	120	-17.1492	0	36.5832	Fail	0.109899
1619	02_img44.jpg	PurpleMedicine	995	755	300	146	-8.34796	0.704073	3.22422	Success	0.0890031
1620	02_img44.jpg	SoftWash	669	477	390	264	65.367	0.861224	5.72679	Success	0.162074
1621	02_img45.jpg	Block	755	397	278	120	-72.7257	0	25.4055	Fail	0.088002
1622	02_img45.jpg	PurpleMedicine	691	624	300	146	-23.7665	0.45714	16.5235	Success	0.0869992
1623	02_img45.jpg	SoftWash	877	355	390	264	-5.996	0.807519	12.7572	Success	0.0950003
1624	02_img46.jpg	Block	483	355	278	120	28.0604	0.735264	8.82793	Success	0.082998
1625	02_img46.jpg	PurpleMedicine	365	707	300	146	77.3502	0.549756	27.7804	Success	0.0779979
1626	02_img46.jpg	SoftWash	931	589	390	264	68.3737	0.817439	6.23098	Success	0.131998
1627	02_img47.jpg	Block	767	702	278	120	68.1296	0	14.6473	Fail	0.101002
1628	02_img47.jpg	PurpleMedicine	302	547	300	146	-39.8837	0.745672	11.6907	Success	0.116003
1629	02_img47.jpg	SoftWash	893	686	390	264	-13.2459	0.901013	3.5941	Success	0.112031
1630	02_img48.jpg	Block	909	317	278	120	-66.4803	0.538133	11.5725	Success	0.0869987
1631	02_img48.jpg	PurpleMedicine	445	447	300	146	-3.50034	0.829799	6.39515	Success	0.0849984
1632	02_img48.jpg	SoftWash	976	685	390	264	-64.1251	0.862648	8.06139	Success	0.150996
1633	02_img49.jpg	Block	1037	317	278	120	-55.7328	0.714466	5.81186	Success	0.0909984
1634	02_img49.jpg	PurpleMedicine	797	707	300	146	-70.1237	0.815072	5.48532	Success	0.0809991
1635	02_img49.jpg	SoftWash	301	461	390	264	36.6798	0.766958	17.7082	Success	0.128029
1636	02_img5.jpg	FruitKnife	561	227	440	256	-81.5244	0.917067	0.196648	Success	0.174002
1637	02_img5.jpg	GreenSoap	989	560	396	274	65.1205	0.841742	0.38308	Success	0.137031
1638	02_img5.jpg	Pepper	429	557	366	156	-35.2991	0.515612	0.896488	Success	0.118003
1639	02_img50.jpg	Block	333	781	278	120	-15.2796	0.683427	16.4798	Success	0.0570016
1640	02_img50.jpg	PurpleMedicine	605	274	300	146	-7.00552	0.814587	1.67731	Success	0.077003
1641	02_img50.jpg	SoftWash	765	717	390	264	-19.1664	0.831911	4.75464	Success	0.122998
1642	02_img51.jpg	Block	208	525	278	120	71.8322	0.728245	13.7959	Success	0.0830028
1643	02_img51.jpg	PurpleMedicine	563	445	300	146	81.5016	0.606335	1.57333	Success	0.0920033
1644	02_img51.jpg	SoftWash	979	557	390	264	22.6868	0.895063	3.74331	Success	0.143005
1645	02_img52.jpg	Block	221	755	278	120	-35.1273	0.861806	4.44586	Success	0.101999
1646	02_img52.jpg	PurpleMedicine	429	333	300	146	29.0006	0.725906	16.7749	Success	0.0889995
1647	02_img52.jpg	SoftWash	818	621	390	264	68.2772	0.804161	13.159	Success	0.145004
1648	02_img53.jpg	Block	605	813	278	120	-13.3142	0	40.6552	Fail	0.124001
1649	02_img53.jpg	PurpleMedicine	995	413	300	146	-12.7039	0.839096	3.76775	Success	0.0909986
1650	02_img53.jpg	SoftWash	589	669	390	264	68.6768	0.722446	20.7015	Success	0.137002
1651	02_img54.jpg	Block	307	381	278	120	57.6961	0.831604	8.08639	Success	0.0910015
1652	02_img54.jpg	PurpleMedicine	685	658	300	146	-53.5416	0.827418	4.05983	Success	0.0970016
1653	02_img54.jpg	SoftWash	816	322	390	264	58.0218	0.840409	9.35133	Success	0.144018
1654	02_img55.jpg	Block	589	323	278	120	8.97036	0.897373	4.45737	Success	0.0760016
1655	02_img55.jpg	PurpleMedicine	367	717	300	146	11.4502	0.832192	8.93995	Success	0.0650001
1656	02_img55.jpg	SoftWash	925	653	390	264	65.9221	0.721963	11.4831	Success	0.143003
1657	02_img56.jpg	Block	589	685	278	120	61.5433	0.836255	2.76168	Success	0.0909984
1658	02_img56.jpg	PurpleMedicine	227	467	300	146	39.374	0.664425	20.8285	Success	0.0710039
1659	02_img56.jpg	SoftWash	930	365	390	264	69.8062	0.825801	11.3997	Success	0.144001
1660	02_img57.jpg	Block	195	723	278	120	-68.0841	0.870786	5.19022	Success	0.0749962
1661	02_img57.jpg	PurpleMedicine	371	303	300	146	83.313	0.712462	4.42198	Success	0.0889974
1662	02_img57.jpg	SoftWash	749	638	390	264	22.6261	0.826502	11.4628	Success	0.111998
1663	02_img58.jpg	Block	866	291	278	120	-69.6723	0.867285	5.89274	Success	0.115999
1664	02_img58.jpg	PurpleMedicine	542	317	300	146	-63.219	0.61511	5.23449	Success	0.108004
1665	02_img58.jpg	SoftWash	398	685	390	264	-22.6298	0.774974	15.0361	Success	0.135001
1666	02_img59.jpg	Block	1011	749	278	120	-42.0301	0.902709	0.933159	Success	0.113001
1667	02_img59.jpg	PurpleMedicine	1005	338	300	146	55.5373	0.602565	28.7796	Success	0.0969987
1668	02_img59.jpg	SoftWash	461	413	390	264	41.3876	0.771804	17.3346	Success	0.124998
1669	02_img6.jpg	FruitKnife	813	653	440	256	-59.6576	0.836997	3.13346	Success	0.181004
1670	02_img6.jpg	GreenSoap	989	258	396	274	19.9735	0.82199	4.41556	Success	0.123032
1671	02_img6.jpg	Pepper	205	557	366	156	18.2093	0.84425	5.63272	Success	0.11
1672	02_img60.jpg	Block	557	765	278	120	-34.4671	0.697312	5.69099	Success	0.0990036
1673	02_img60.jpg	PurpleMedicine	1022	611	300	146	30.5867	0.687731	19.6309	Success	0.102997
1674	02_img60.jpg	SoftWash	605	317	390	264	61.871	0.865123	8.13166	Success	0.17108
1675	02_img61.jpg	Block	237	720	278	120	17.7718	0.574467	3.31307	Success	0.0700042
1676	02_img61.jpg	PurpleMedicine	722	627	300	146	82.6647	0.708622	12.1387	Success	0.0859988
1677	02_img61.jpg	SoftWash	365	397	390	264	-6.93746	0.780652	16.542	Success	0.121004
1678	02_img62.jpg	Block	1026	371	278	120	65.8768	0.751993	2.79192	Success	0.132006
1679	02_img62.jpg	PurpleMedicine	387	448	300	146	28.2427	0.719535	16.7827	Success	0.110005
1680	02_img62.jpg	SoftWash	736	733	390	264	19.5414	0.770052	17.699	Success	0.140036
1681	02_img63.jpg	Block	941	701	278	120	13.502	0.889791	4.20094	Success	0.106006
1682	02_img63.jpg	PurpleMedicine	685	256	300	146	-4.99045	0.875497	5.07779	Success	0.0940077
1683	02_img63.jpg	SoftWash	381	578	390	264	-14.7111	0.891779	2.96383	Success	0.12402
1684	02_img64.jpg	Glue	765	365	488	230	70.7918	0.588163	16.6938	Success	0.193005
1685	02_img64.jpg	Pepper	272	557	366	156	-49.021	0.717462	0.498627	Success	0.120999
1686	02_img64.jpg	PurpleMedicine	947	653	300	146	-79.2782	0.674637	5.09534	Success	0.0900033
1687	02_img65.jpg	Glue	717	621	488	230	-35.6908	0.909317	0.350483	Success	0.131001
1688	02_img65.jpg	Pepper	285	355	366	156	30.9785	0.738586	10.0061	Success	0.102024
1689	02_img65.jpg	PurpleMedicine	946	243	300	146	-78.1212	0.649533	10.6361	Success	0.0831113
1690	02_img66.jpg	Glue	669	349	488	230	-73.9524	0.632054	5.70997	Success	0.175005
1691	02_img66.jpg	Pepper	1005	621	366	156	82.1195	0.622844	0.415512	Success	0.132083
1692	02_img66.jpg	PurpleMedicine	291	640	300	146	-73.448	0.586082	6.38424	Success	0.108005
1693	02_img67.jpg	Glue	671	317	488	230	21.7842	0.61062	9.43364	Success	0.123998
1694	02_img67.jpg	Pepper	941	685	366	156	-25.2691	0.93539	1.68637	Success	0.119999
1695	02_img67.jpg	PurpleMedicine	621	301	300	146	-8.32537	0	59.6066	Fail	0.102031
1696	02_img68.jpg	Glue	605	365	488	230	-35.1711	0.795679	0.527859	Success	0.111999
1697	02_img68.jpg	Pepper	962	669	366	156	64.0064	0.61358	22.1236	Success	0.137055
1698	02_img68.jpg	PurpleMedicine	304	621	300	146	-30.2007	0.824983	0.54356	Success	0.105003
1699	02_img69.jpg	Glue	241	317	488	230	-12.6445	0.86078	2.85915	Success	0.115999
1700	02_img69.jpg	Pepper	721	685	366	156	-38.7098	0.678349	0.879799	Success	0.102028
1701	02_img69.jpg	PurpleMedicine	947	285	300	146	-19.2626	0.784498	0.542456	Success	0.0770001
1702	02_img7.jpg	FruitKnife	749	685	440	256	25.9145	0.813186	6.14431	Success	0.116
1703	02_img7.jpg	GreenSoap	845	285	396	274	-27.3573	0.861846	0.145546	Success	0.0980005
1704	02_img7.jpg	Pepper	224	365	366	156	80.8101	0.737583	0.897842	Success	0.0959995
1705	02_img70.jpg	Glue	959	717	488	230	-43.7725	0.459253	7.89848	Success	0.157001
1706	02_img70.jpg	Pepper	371	589	366	156	27.4719	0.749289	11.2844	Success	0.0980015
1707	02_img70.jpg	PurpleMedicine	669	189	300	146	-19.1703	0.808046	1.43503	Success	0.0820012
1708	02_img71.jpg	Glue	909	543	488	230	66.9059	0.549295	22.1867	Success	0.151001
1709	02_img71.jpg	Pepper	333	611	366	156	-31.8801	0.83396	0.443979	Success	0.122021
1710	02_img71.jpg	PurpleMedicine	589	221	300	146	76.6949	0.615616	18.2808	Success	0.0870273
1711	02_img72.jpg	Glue	637	589	488	230	-71.7282	0.697831	9.93321	Success	0.116977
1712	02_img72.jpg	Pepper	163	478	366	156	78.7287	0.820296	6.42054	Success	0.0980005
1713	02_img72.jpg	PurpleMedicine	1043	467	300	146	-73.1208	0.834157	3.64816	Success	0.0820007
1714	02_img73.jpg	Glue	909	253	488	230	-0.990711	0.902189	1.4525	Success	0.119858
1715	02_img73.jpg	Pepper	381	461	366	156	82.6023	0.904691	2.13432	Success	0.0949988
1716	02_img73.jpg	PurpleMedicine	973	707	300	146	63.0465	0.527877	34.7007	Fail	0.0880284
1717	02_img74.jpg	Glue	989	334	488	230	80.363	0.538777	2.19952	Success	0.164005
1718	02_img74.jpg	Pepper	338	413	366	156	42.677	0.690344	13.1589	Success	0.110032
1719	02_img74.jpg	PurpleMedicine	749	691	300	146	-20.9077	0.861157	4.22568	Success	0.0869999
1720	02_img75.jpg	Glue	685	653	488	230	-2.8205	0.658484	0.841217	Success	0.111974
1721	02_img75.jpg	Pepper	851	285	366	156	-2.42705	0.724087	2.58914	Success	0.0870001
1722	02_img75.jpg	PurpleMedicine	605	669	300	146	-36.8099	0	61.6061	Fail	0.0910304
1723	02_img76.jpg	Glue	317	526	488	230	69.6158	0.634815	22.1253	Success	0.148997
1724	02_img76.jpg	Pepper	978	238	366	156	-30.6709	0.875615	1.08789	Success	0.132026
1725	02_img76.jpg	PurpleMedicine	941	673	300	146	-53.3814	0.756666	6.06554	Success	0.102023
1726	02_img77.jpg	Glue	287	381	488	230	-76.285	0.663463	11.2513	Success	0.111006
1727	02_img77.jpg	Pepper	257	371	366	156	-71.649	0	22.6154	Fail	0.0979993
1728	02_img77.jpg	PurpleMedicine	701	707	300	146	-22.3827	0.834614	6.57894	Success	0.0800006
1729	02_img78.jpg	Glue	366	227	488	230	-7.91331	0.754595	4.37633	Success	0.131976
1730	02_img78.jpg	Pepper	867	541	366	156	18.5563	0.841258	6.2343	Success	0.0820026
1731	02_img78.jpg	PurpleMedicine	381	221	300	146	25.4353	0	67.8461	Fail	0.0810015
1732	02_img79.jpg	Glue	861	445	488	230	-71.2936	0.36349	44.5717	Fail	0.173002
1733	02_img79.jpg	O2	530	669	438	184	-9.60304	0.864404	3.78568	Success	0.0900047
1734	02_img79.jpg	Block	429	210	278	120	-62.373	0.61879	4.31945	Success	0.0980077
1735	02_img8.jpg	FruitKnife	941	365	440	256	-28.3085	0.701856	18.6356	Success	0.140997
1736	02_img8.jpg	GreenSoap	605	690	396	274	-52.4902	0.84378	9.2161	Success	0.142034
1737	02_img8.jpg	Pepper	256	227	366	156	-36.5574	0.821306	2.0873	Success	0.119999
1738	02_img80.jpg	Glue	1005	413	488	230	-72.781	0.594999	7.27758	Success	0.131006
1739	02_img80.jpg	O2	525	705	438	184	-43.6332	0.82316	1.46747	Success	0.118048
1740	02_img80.jpg	Block	477	189	278	120	63.9242	0.862978	0.672688	Success	0.105027
1741	02_img81.jpg	Glue	928	701	488	230	-41.1917	0.703919	4.04829	Success	0.148999
1742	02_img81.jpg	O2	317	605	438	184	78.786	0.766915	10.1717	Success	0.15303
1743	02_img81.jpg	Block	754	205	278	120	-68.6579	0.808705	8.91095	Success	0.119003
1744	02_img82.jpg	Glue	365	349	488	230	16.3034	0.512815	10.5279	Success	0.118975
1745	02_img82.jpg	O2	557	621	438	184	-6.28279	0.927128	1.47031	Success	0.101998
1746	02_img82.jpg	Block	1059	467	278	120	-71.837	0.817524	7.99169	Success	0.088002
1747	02_img83.jpg	SmallMedicine	557	627	260	158	12.3868	0.785272	14.3848	Success	0.0839992
1748	02_img83.jpg	LaptopClean	733	525	442	174	25.6729	0	31.3143	Fail	0.131025
1749	02_img83.jpg	T1	401	221	432	114	-18.1604	0.955634	1.24271	Success	0.0950012
1750	02_img84.jpg	SmallMedicine	947	707	260	158	-59.3073	0	0.198631	Fail	0.103999
1751	02_img84.jpg	LaptopClean	941	733	442	174	-23.8732	0.670092	6.68288	Success	0.140072
1752	02_img84.jpg	T1	861	301	432	114	27.8141	0.578853	12.2026	Success	0.0969987
1753	02_img85.jpg	SmallMedicine	275	305	260	158	10.5731	0.944175	2.78121	Success	0.0768502
1754	02_img85.jpg	LaptopClean	349	365	442	174	-20.4532	0	80.3825	Fail	0.108854
1755	02_img85.jpg	T1	941	477	432	114	-77.4146	0.395052	0.533058	Success	0.0918825
1756	02_img86.jpg	SmallMedicine	915	253	260	158	39.4085	0.760055	16.6563	Success	0.113977
1757	02_img86.jpg	LaptopClean	333	561	442	174	-61.5067	0.426292	2.85102	Success	0.133032
1758	02_img86.jpg	T1	765	685	432	114	-47.2934	0.948433	0.50209	Success	0.103005
1759	02_img87.jpg	SmallMedicine	371	674	260	158	10.0635	0.847269	3.27447	Success	0.0649967
1760	02_img87.jpg	LaptopClean	525	285	442	174	-6.12542	0.710808	0.0287819	Success	0.110002
1761	02_img87.jpg	T1	577	269	432	114	-6.7196	0	54.6806	Fail	0.100018
1762	02_img88.jpg	SmallMedicine	385	611	260	158	-50.4454	0.795911	12.6973	Success	0.0760021
1763	02_img88.jpg	LaptopClean	941	256	442	174	-15.7516	0.857267	0.877165	Success	0.100001
1764	02_img88.jpg	T1	765	701	432	114	-49.7354	0.640278	2.61762	Success	0.0990002
1765	02_img89.jpg	SmallMedicine	707	749	260	158	18.299	0.94059	3.17497	Success	0.0920026
1766	02_img89.jpg	LaptopClean	941	317	442	174	-14.4312	0.75706	0.287443	Success	0.117004
1767	02_img89.jpg	T1	350	397	432	114	71.1816	0.398895	25.8848	Success	0.11703
1768	02_img9.jpg	FruitKnife	864	609	440	256	58.0606	0.798656	12.0748	Success	0.192002
1769	02_img9.jpg	GreenSoap	349	655	396	274	-6.97651	0.771835	17.3557	Success	0.112045
1770	02_img9.jpg	Pepper	643	221	366	156	-78.9049	0.761939	3.64013	Success	0.109026
1771	02_img90.jpg	SmallMedicine	861	307	260	158	30.6683	0	55.3283	Fail	0.0889988
1772	02_img90.jpg	LaptopClean	925	333	442	174	-0.846267	0.78324	0.985762	Success	0.113997
1773	02_img90.jpg	T1	349	461	432	114	-2.80798	0.537932	3.44383	Success	0.0849996
1774	02_img91.jpg	Block	447	211	278	120	8.58465	0.899063	4.62484	Success	0.073998
1775	02_img91.jpg	Pepper	336	621	366	156	-17.4719	0.773906	0.212355	Success	0.107996
1776	02_img91.jpg	PaperKnife	365	445	532	146	82.0945	0	8.95029	Fail	0.106999
1777	02_img92.jpg	Block	621	178	278	120	52.8979	0.60956	20.5927	Success	0.103004
1778	02_img92.jpg	Pepper	369	589	366	156	-55.8147	0.766013	0.159779	Success	0.108995
1779	02_img92.jpg	PaperKnife	861	509	532	146	-10.3876	0.865929	0.893403	Success	0.089998
1780	02_img93.jpg	Block	877	269	278	120	62.8234	0.830936	4.78326	Success	0.111996
1781	02_img93.jpg	Pepper	339	451	366	156	47.4636	0.648691	20.7992	Success	0.101028
1782	02_img93.jpg	PaperKnife	845	653	532	146	-26.7576	0.684472	4.36324	Success	0.126
1783	02_img94.jpg	Block	957	237	278	120	26.8473	0.690126	8.36262	Success	0.113007
1784	02_img94.jpg	Pepper	766	605	366	156	-35.1739	0.578899	0.353786	Success	0.119026
1785	02_img94.jpg	PaperKnife	259	509	532	146	22.5117	0.549973	8.5864	Success	0.122049
1786	02_img95.jpg	Block	909	205	278	120	-28.6707	0.728506	11.7834	Success	0.0940056
1787	02_img95.jpg	Pepper	781	621	366	156	-11.8548	0.858324	1.38424	Success	0.0930073
1788	02_img95.jpg	PaperKnife	259	445	532	146	-39.8062	0.890542	1.74996	Success	0.130039
1789	02_img96.jpg	Block	909	288	278	120	-23.8459	0.783119	10.5044	Success	0.0830007
1790	02_img96.jpg	Pepper	673	640	366	156	-32.8517	0.609284	7.72076	Success	0.114
1791	02_img96.jpg	PaperKnife	337	413	532	146	-3.32843	0.304034	7.63333	Success	0.115035
1792	02_img97.jpg	Block	317	705	278	120	71.5962	0.7878	10.0769	Success	0.134001
1793	02_img97.jpg	Pepper	397	205	366	156	-54.9428	0.613255	3.45127	Success	0.153003
1794	02_img97.jpg	PaperKnife	909	621	532	146	71.4584	0.370011	28.9523	Success	0.162017
1795	02_img98.jpg	Block	237	381	278	120	9.3127	0.80552	0.327942	Success	0.086
1796	02_img98.jpg	Pepper	1010	163	366	156	82.7754	0.759817	1.98006	Success	0.142
1797	02_img98.jpg	PaperKnife	733	622	532	146	-44.2075	0.950001	0.829411	Success	0.121004
1798	02_img99.jpg	Block	317	189	278	120	13.5925	0.871447	1.45378	Success	0.0700052
1799	02_img99.jpg	Pepper	1005	285	366	156	-77.6927	0.806115	5.03607	Success	0.134998
1800	02_img99.jpg	PaperKnife	397	605	532	146	-28.9943	0.330349	1.40734	Success	0.121004
1801	03_img0.jpg	FruitKnife	224	349	440	256	20.9289	0.454901	0.0335865	Success	0.157994
1802	03_img0.jpg	RedMedicine	368	707	324	142	-78.3698	0.720796	2.64016	Success	0.11725
1803	03_img0.jpg	Block	989	257	278	120	-41.8888	0.750726	11.9771	Success	0.133993
1804	03_img0.jpg	LaptopClean	909	639	442	174	-25.7754	0.770784	0.964067	Success	0.103993
1805	03_img1.jpg	Shampoo	509	225	448	170	-37.4551	0.253239	83.9197	Fail	0.126995
1806	03_img1.jpg	Xisat	717	259	526	144	-33.526	0.273102	2.81345	Success	0.126
1807	03_img1.jpg	SmallMedicine	787	653	260	158	-61.6033	0.707341	3.74115	Success	0.102001
1808	03_img1.jpg	Pepper	349	637	366	156	-57.0567	0.717904	0.456005	Success	0.115003
1809	03_img10.jpg	Pepper	429	781	366	156	80.2779	0.599883	10.3855	Success	0.0927587
1810	03_img10.jpg	RedMedicine	877	685	324	142	82.0995	0.881505	2.67509	Success	0.0789742
1811	03_img10.jpg	LaptopClean	909	301	442	174	-27.256	0.460152	4.37887	Success	0.0969465
1812	03_img10.jpg	O2	625	285	438	184	71.3877	0.257299	10.348	Success	0.0970197
1813	03_img100.jpg	Block	976	733	278	120	-62.6195	0.650482	2.2887	Success	0.113979
1814	03_img100.jpg	FruitKnife	417	286	440	256	-39.4278	0.704681	3.43176	Success	0.144999
1815	03_img100.jpg	SmallMedicine	1005	323	260	158	14.9675	0	27.3553	Fail	0.0760036
1816	03_img100.jpg	PurpleMedicine	959	317	300	146	14.1004	0.812993	9.61348	Success	0.0719967
1817	03_img101.jpg	Block	499	672	278	120	66.0914	0.696509	4.16824	Success	0.0820026
1818	03_img101.jpg	FruitKnife	333	333	440	256	68.7399	0.782762	14.0829	Success	0.123998
1819	03_img101.jpg	SmallMedicine	915	717	260	158	-65.3765	0	16.5955	Fail	0.0750005
1820	03_img101.jpg	PurpleMedicine	909	685	300	146	-68.6304	0.688015	11.7322	Success	0.0700021
1821	03_img102.jpg	Block	269	272	278	120	63.4483	0.930451	0.51878	Success	0.101974
1822	03_img102.jpg	FruitKnife	798	319	440	256	40.8548	0.762714	11.0554	Success	0.14097
1823	03_img102.jpg	SmallMedicine	461	675	260	158	-59.46	0.655125	12.8984	Success	0.0899739
1824	03_img102.jpg	PurpleMedicine	930	659	300	146	-60.7543	0.956146	0.239445	Success	0.082973
1825	03_img103.jpg	PurpleMedicine	323	221	300	146	52.8355	0.66487	19.7377	Success	0.0909998
1826	03_img103.jpg	Pepper	946	381	366	156	-64.8402	0.83598	0.602448	Success	0.102996
1827	03_img103.jpg	SmallMedicine	611	493	260	158	57.5672	0.651561	6.62635	Success	0.0889978
1828	03_img103.jpg	Block	349	669	278	120	-38.4103	0.655189	5.08757	Success	0.0959992
1829	03_img104.jpg	PurpleMedicine	253	259	300	146	72.8567	0.680671	21.2209	Success	0.0769994
1830	03_img104.jpg	Pepper	925	275	366	156	-57.9764	0.692131	0.407635	Success	0.105
1831	03_img104.jpg	SmallMedicine	381	675	260	158	38.6758	0.861266	7.15046	Success	0.0930002
1832	03_img104.jpg	Block	589	430	278	120	-41.2163	0.913691	1.50716	Success	0.109998
1833	03_img105.jpg	PurpleMedicine	849	269	300	146	-15.7916	0.916608	0.675212	Success	0.0629976
1834	03_img105.jpg	Pepper	829	720	366	156	-57.184	0.859408	0.232124	Success	0.116001
1835	03_img105.jpg	SmallMedicine	835	273	260	158	-50.4931	0	15.628	Fail	0.0919969
1836	03_img105.jpg	Block	387	637	278	120	70.3145	0.766267	7.34322	Success	0.0909996
1837	03_img106.jpg	PurpleMedicine	381	673	300	146	-48.4258	0.571804	10.6823	Success	0.0910013
1838	03_img106.jpg	Pepper	445	301	366	156	68.7389	0.633726	20.9702	Success	0.129998
1839	03_img106.jpg	SmallMedicine	909	306	260	158	50.8177	0.659445	7.61527	Success	0.100999
1840	03_img106.jpg	Block	989	685	278	120	61.1524	0.955002	1.26678	Success	0.111999
1841	03_img107.jpg	FruitKnife	227	669	440	256	3.43633	0.790385	10.4293	Success	0.154999
1842	03_img107.jpg	Pepper	851	685	366	156	-35.2	0.608682	1.81089	Success	0.111994
1843	03_img107.jpg	PurpleMedicine	317	243	300	146	-28.4248	0.878386	1.29212	Success	0.0899968
1844	03_img107.jpg	GreenSoap	861	253	396	274	69.6479	0.735119	2.61391	Success	0.121998
1845	03_img108.jpg	FruitKnife	589	733	440	256	58.3877	0	23.097	Fail	0.124996
1846	03_img108.jpg	Pepper	765	237	366	156	-69.227	0.552937	5.12318	Success	0.0940006
1847	03_img108.jpg	PurpleMedicine	1043	477	300	146	-78.2526	0.627564	3.37463	Success	0.0790014
1848	03_img108.jpg	GreenSoap	563	751	396	274	33.7107	0.661154	7.38149	Success	0.109036
1849	03_img109.jpg	PurpleMedicine	813	243	300	146	30.3371	0	47.7678	Fail	0.0789804
1850	03_img109.jpg	GreenSoap	915	258	396	274	-6.41013	0.92124	0.0653706	Success	0.0980036
1851	03_img109.jpg	Block	818	701	278	120	-43.5796	0.855517	5.89771	Success	0.102005
1852	03_img109.jpg	Pepper	320	227	366	156	-18.7866	0.845763	1.06475	Success	0.0950029
1853	03_img11.jpg	Pepper	579	227	366	156	-39.6033	0.720987	5.47541	Success	0.121004
1854	03_img11.jpg	RedMedicine	835	605	324	142	-22.9987	0.889454	1.23431	Success	0.0929737
1855	03_img11.jpg	LaptopClean	829	557	442	174	-13.1456	0	34.2459	Fail	0.133205
1856	03_img11.jpg	O2	829	605	438	184	-20.1697	0	46.179	Fail	0.129998
1857	03_img110.jpg	PurpleMedicine	797	675	300	146	-31.6128	0.799619	4.75133	Success	0.0859785
1858	03_img110.jpg	GreenSoap	957	205	396	274	42.6662	0.716522	6.99113	Success	0.125
1859	03_img110.jpg	Block	333	675	278	120	27.938	0.756003	10.1144	Success	0.0930099
1860	03_img110.jpg	Pepper	322	253	366	156	28.0918	0.756319	11.2679	Success	0.108995
1861	03_img111.jpg	PurpleMedicine	1027	227	300	146	78.5849	0.652655	11.4473	Success	0.0830007
1862	03_img111.jpg	GreenSoap	718	733	396	274	-61.9958	0.688008	12.148	Success	0.118999
1863	03_img111.jpg	Block	273	643	278	120	42.5022	0.716464	13.8348	Success	0.0829988
1864	03_img111.jpg	Pepper	413	227	366	156	-30.7712	0.805583	2.60567	Success	0.0989983
1865	03_img112.jpg	Block	941	483	278	120	-39.3066	0.945707	0.877216	Success	0.100617
1866	03_img112.jpg	LaptopClean	605	285	442	174	74.4871	0.519604	27.7826	Success	0.117918
1867	03_img112.jpg	SmallMedicine	176	467	260	158	-50.8801	0.726266	1.31763	Success	0.0949998
1868	03_img112.jpg	Pepper	669	685	366	156	-56.756	0.705553	3.6954	Success	0.100037
1869	03_img113.jpg	FruitKnife	749	733	440	256	4.65383	0.80792	12.416	Success	0.13401
1870	03_img113.jpg	Glue	909	365	488	230	-39.4476	0.393473	12.018	Success	0.133008
1871	03_img113.jpg	SmallMedicine	589	429	260	158	40.1816	0.71848	4.401	Success	0.0900102
1872	03_img113.jpg	PurpleMedicine	224	493	300	146	-51.2586	0.693341	10.4239	Success	0.0870094
1873	03_img114.jpg	SmallMedicine	814	722	260	158	-57.9854	0.658896	6.34855	Success	0.076998
1874	03_img114.jpg	PurpleMedicine	317	595	300	146	64.154	0.679954	16.0669	Success	0.103032
1875	03_img114.jpg	Block	429	269	278	120	-57.5852	0.78425	0.939129	Success	0.108046
1876	03_img114.jpg	HandClean	927	301	392	214	49.2096	0.84968	6.79753	Success	0.109887
1877	03_img115.jpg	SmallMedicine	415	205	260	158	-47.5913	0.726908	15.3073	Success	0.0749974
1878	03_img115.jpg	PurpleMedicine	830	269	300	146	73.6531	0.552134	21.4242	Success	0.0929954
1879	03_img115.jpg	Block	381	611	278	120	56.98	0.807804	4.81935	Success	0.128001
1880	03_img115.jpg	HandClean	898	672	392	214	51.7078	0.869991	7.39175	Success	0.143997
1881	03_img116.jpg	Pepper	749	371	366	156	-76.8143	0.87982	0.292679	Success	0.086998
1882	03_img116.jpg	HandClean	941	653	392	214	49.585	0.515135	12.5961	Success	0.115
1883	03_img116.jpg	SmallMedicine	371	179	260	158	-56.5827	0.780448	14.8459	Success	0.0900002
1884	03_img116.jpg	PurpleMedicine	398	637	300	146	-53.3886	0.811519	7.90923	Success	0.0830407
1885	03_img117.jpg	Pepper	993	306	366	156	23.8038	0.777577	11.2731	Success	0.0850015
1886	03_img117.jpg	HandClean	496	237	392	214	41.5492	0.771606	14.3943	Success	0.136003
1887	03_img117.jpg	SmallMedicine	319	675	260	158	17.8384	0.812189	11.38	Success	0.0800025
1888	03_img117.jpg	PurpleMedicine	736	607	300	146	-74.2051	0.580274	12.536	Success	0.0800023
1889	03_img118.jpg	GreenSoap	989	621	396	274	-34.7398	0.906884	1.22026	Success	0.113998
1890	03_img118.jpg	RedMedicine	483	685	324	142	79.244	0.608582	2.96685	Success	0.0770013
1891	03_img118.jpg	HandClean	685	221	392	214	49.1058	0.778553	8.98992	Success	0.109998
1892	03_img118.jpg	Pepper	163	387	366	156	-74.0071	0.7344	0.37664	Success	0.108
1893	03_img119.jpg	GreenSoap	977	672	396	274	-42.4937	0.90724	4.82097	Success	0.145974
1894	03_img119.jpg	RedMedicine	975	227	324	142	8.82908	0.895707	4.80299	Success	0.0799768
1895	03_img119.jpg	HandClean	957	253	392	214	-33.453	0	85.9137	Fail	0.130299
1896	03_img119.jpg	Pepper	477	701	366	156	80.0282	0.829561	3.94869	Success	0.111976
1897	03_img12.jpg	Pepper	813	637	366	156	77.1681	0.775516	8.34218	Success	0.103997
1898	03_img12.jpg	RedMedicine	525	301	324	142	-68.2193	0.463722	8.06819	Success	0.0869734
1899	03_img12.jpg	LaptopClean	497	559	442	174	-81.2199	0	16.1892	Fail	0.119999
1900	03_img12.jpg	O2	463	573	438	184	-81.1285	0.518098	4.18626	Success	0.120995
1901	03_img120.jpg	Pepper	301	253	366	156	-15.4896	0.92022	1.63789	Success	0.115999
1902	03_img120.jpg	SmallMedicine	957	237	260	158	32.6666	0.763659	17.328	Success	0.0970323
1903	03_img120.jpg	T1	879	701	432	114	-31.4847	0.766689	2.1481	Success	0.0820005
1904	03_img120.jpg	Block	291	227	278	120	-28.7064	0.674186	1.44016	Success	0.0810003
1905	03_img121.jpg	Pepper	301	221	366	156	-36.5478	0.912677	2.90804	Success	0.110003
1906	03_img121.jpg	SmallMedicine	301	225	260	158	-59.0444	0.971451	1.4016	Success	0.115
1907	03_img121.jpg	T1	783	207	432	114	75.4685	0.735234	3.62837	Success	0.107003
1908	03_img121.jpg	Block	435	749	278	120	56.5904	0.922586	0.3573	Success	0.112001
1909	03_img122.jpg	Pepper	973	675	366	156	-19.061	0.89511	2.40145	Success	0.0949974
1910	03_img122.jpg	SmallMedicine	912	243	260	158	30.483	0.825178	10.0944	Success	0.0880001
1911	03_img122.jpg	T1	349	240	432	114	57.3335	0.751485	6.43006	Success	0.0855327
1912	03_img122.jpg	Block	963	685	278	120	-33.4217	0.715178	3.54026	Success	0.0739992
1913	03_img123.jpg	Pepper	928	291	366	156	-10.5036	0.79633	3.72978	Success	0.107005
1914	03_img123.jpg	SmallMedicine	947	301	260	158	-48.4707	0.898891	1.06271	Success	0.090997
1915	03_img123.jpg	T1	334	685	432	114	-16.0361	0.754136	2.5011	Success	0.0860019
1916	03_img123.jpg	Block	909	291	278	120	-25.656	0	37.6663	Fail	0.0900028
1917	03_img124.jpg	Pepper	445	243	366	156	66.7986	0.556717	28.6123	Success	0.094002
1918	03_img124.jpg	SmallMedicine	896	723	260	158	59.7665	0.723086	12.6454	Success	0.123517
1919	03_img124.jpg	T1	221	669	432	114	-52.4293	0.801503	0.112503	Success	0.0970011
1920	03_img124.jpg	Block	963	190	278	120	65.7456	0.849792	0.134521	Success	0.0949993
1921	03_img125.jpg	Pepper	878	622	366	156	-30.0547	0.732363	0.979835	Success	0.139
1922	03_img125.jpg	SmallMedicine	1005	254	260	158	22.5022	0.839214	4.49516	Success	0.0889988
1923	03_img125.jpg	T1	269	605	432	114	56.8993	0.477889	22.3023	Success	0.0950022
1924	03_img125.jpg	Block	397	221	278	120	-45.7409	0.92901	0.603008	Success	0.111016
1925	03_img126.jpg	Pepper	321	657	366	156	74.0329	0.744112	11.7072	Success	0.143995
1926	03_img126.jpg	SmallMedicine	435	256	260	158	-58.6779	0.788972	13.2441	Success	0.108994
1927	03_img126.jpg	T1	797	656	432	114	71.9628	0.479464	18.6787	Success	0.101043
1928	03_img126.jpg	Block	909	227	278	120	-39.0107	0.871244	5.07965	Success	0.104
1929	03_img127.jpg	Pepper	301	573	366	156	-39.6847	0.776503	0.0869904	Success	0.0849991
1930	03_img127.jpg	SmallMedicine	451	227	260	158	-66.2817	0.903555	5.3263	Success	0.0970004
1931	03_img127.jpg	T1	877	286	432	114	65.2216	0.424106	23.0901	Success	0.103021
1932	03_img127.jpg	Block	831	701	278	120	-36.3441	0.815984	9.24856	Success	0.090003
1933	03_img128.jpg	Yogurt	813	685	478	196	-36.5252	0.935047	2.52152	Success	0.108002
1934	03_img128.jpg	Block	989	207	278	120	42.4039	0.752483	11.3922	Success	0.121803
1935	03_img128.jpg	PurpleMedicine	307	227	300	146	-20.6334	0	69.3597	Fail	0.103993
1936	03_img128.jpg	HandClean	306	243	392	214	-29.1895	0.682799	6.42911	Success	0.134529
1937	03_img129.jpg	Yogurt	333	477	478	196	-81.8869	0.49636	12.0165	Success	0.100004
1938	03_img129.jpg	Block	653	243	278	120	-69.1888	0.720584	5.67589	Success	0.0860062
1939	03_img129.jpg	PurpleMedicine	930	707	300	146	-72.1565	0.735151	6.30026	Success	0.0770068
1940	03_img129.jpg	HandClean	1085	270	392	214	48.4205	0.716221	14.1542	Success	0.0970063
1941	03_img13.jpg	Pepper	835	578	366	156	-27.1433	0.788832	3.18759	Success	0.114
1942	03_img13.jpg	RedMedicine	403	605	324	142	-76.2004	0.879744	1.65623	Success	0.0830011
1943	03_img13.jpg	LaptopClean	959	225	442	174	-29.8932	0.435795	0.0260334	Success	0.117003
1944	03_img13.jpg	O2	736	225	438	184	76.6881	0.31109	55.9536	Fail	0.113998
1945	03_img130.jpg	CokeBottle	941	285	576	202	81.0657	0.646235	8.85709	Success	0.13598
1946	03_img130.jpg	SmallMedicine	723	769	260	158	28.8972	0.815639	5.62687	Success	0.0983198
1947	03_img130.jpg	HandClean	269	237	392	214	-25.7008	0.753802	15.6772	Success	0.0890048
1948	03_img130.jpg	PurpleMedicine	338	685	300	146	81.608	0.765589	1.10965	Success	0.083004
1949	03_img131.jpg	MilkBottle	512	621	532	238	34.9056	0.859311	2.7123	Success	0.159997
1950	03_img131.jpg	Block	765	158	278	120	-37.4011	0.733786	6.55708	Success	0.115998
1951	03_img131.jpg	SmallMedicine	1027	608	260	158	-64.2066	0.752591	8.75	Success	0.104999
1952	03_img131.jpg	RedMedicine	176	285	324	142	-57.2793	0.737859	3.06118	Success	0.0940385
1953	03_img132.jpg	MilkBottle	797	637	532	238	33.2994	0.861013	2.34561	Success	0.124995
1954	03_img132.jpg	Block	877	227	278	120	-58.6602	0.672031	0.851398	Success	0.113997
1955	03_img132.jpg	SmallMedicine	209	707	260	158	46.6909	0.698833	17.2167	Success	0.0948484
1956	03_img132.jpg	RedMedicine	461	205	324	142	64.8873	0.62035	21.8588	Success	0.0839963
1957	03_img133.jpg	HandClean	1071	333	392	214	52.9556	0.940477	0.362461	Success	0.143998
1958	03_img133.jpg	ABBottle	333	509	474	186	-71.8114	0.450314	1.5727	Success	0.107
1959	03_img133.jpg	SmallMedicine	803	717	260	158	-51.2973	0.854087	7.08505	Success	0.0789979
1960	03_img133.jpg	Pepper	637	205	366	156	82.1094	0.881495	3.18188	Success	0.0920017
1961	03_img134.jpg	HandClean	589	195	392	214	52.7852	0.596977	3.81166	Success	0.0970013
1962	03_img134.jpg	ABBottle	526	643	474	186	5.75098	0.68916	2.87149	Success	0.0889957
1963	03_img134.jpg	SmallMedicine	429	670	260	158	-51.7432	0	35.731	Fail	0.0739956
1964	03_img134.jpg	Pepper	291	317	366	156	-79.8467	0.561702	3.91094	Success	0.0849993
1965	03_img135.jpg	HandClean	897	195	392	214	53.267	0.778217	0.220085	Success	0.117004
1966	03_img135.jpg	ABBottle	413	227	474	186	-49.8336	0.764046	0.520565	Success	0.112999
1967	03_img135.jpg	SmallMedicine	493	723	260	158	52.4118	0.6614	8.16041	Success	0.0920031
1968	03_img135.jpg	Pepper	957	723	366	156	-54.1262	0.823119	3.4766	Success	0.106002
1969	03_img136.jpg	Block	371	254	278	120	-21.5802	0.710884	16.8624	Success	0.0669756
1970	03_img136.jpg	Shampoo	896	253	448	170	27.4089	0.73983	12.5188	Success	0.0929763
1971	03_img136.jpg	PurpleMedicine	259	621	300	146	-5.2631	0.922009	2.53108	Success	0.0819733
1972	03_img136.jpg	GreenSoap	771	707	396	274	-67.6549	0.793498	0.13681	Success	0.121041
1973	03_img137.jpg	Block	253	739	278	120	67.1229	0.689947	9.40501	Success	0.107
1974	03_img137.jpg	Shampoo	301	337	448	170	30.3589	0.67474	15.8827	Success	0.103516
1975	03_img137.jpg	PurpleMedicine	877	671	300	146	-19.0663	0.812328	4.78081	Success	0.0870457
1976	03_img137.jpg	GreenSoap	962	256	396	274	71.6084	0.691281	15.5316	Success	0.130188
1977	03_img138.jpg	Block	637	719	278	120	62.3371	0.499492	12.1861	Success	0.113918
1978	03_img138.jpg	Shampoo	943	528	448	170	81.4287	0.533672	18.8024	Success	0.139024
1979	03_img138.jpg	PurpleMedicine	589	237	300	146	-27.05	0.763419	4.86648	Success	0.108002
1980	03_img138.jpg	GreenSoap	195	477	396	274	-61.5841	0.73075	1.57768	Success	0.146042
1981	03_img139.jpg	FruitKnife	861	685	440	256	-60.3332	0.854602	5.72835	Success	0.181876
1982	03_img139.jpg	LaptopClean	960	227	442	174	-3.04517	0.852017	5.51253	Success	0.0855312
1983	03_img139.jpg	PurpleMedicine	867	205	300	146	16.9787	0	26.2517	Fail	0.0762632
1984	03_img139.jpg	Pepper	301	221	366	156	-19.4838	0.936075	2.65899	Success	0.0883002
1985	03_img14.jpg	FruitKnife	733	625	440	256	51.7227	0.790462	11.4348	Success	0.144001
1986	03_img14.jpg	RedMedicine	979	349	324	142	-72.2113	0.512745	4.9424	Success	0.0960238
1987	03_img14.jpg	Block	141	515	278	120	30.6777	0.574821	3.47916	Success	0.0969973
1988	03_img14.jpg	LaptopClean	397	318	442	174	79.4105	0.473561	16.6813	Success	0.128026
1989	03_img140.jpg	FruitKnife	333	304	440	256	3.89093	0.764501	8.87959	Success	0.157007
1990	03_img140.jpg	LaptopClean	285	686	442	174	-16.6645	0.882644	4.00131	Success	0.10103
1991	03_img140.jpg	PurpleMedicine	221	659	300	146	-15.1931	0	41.2165	Fail	0.0770054
1992	03_img140.jpg	Pepper	861	653	366	156	-40.1965	0.961923	0.724792	Success	0.0950048
1993	03_img141.jpg	FruitKnife	301	669	440	256	-72.0387	0.960102	1.24403	Success	0.121004
1994	03_img141.jpg	LaptopClean	957	685	442	174	31.8919	0.619592	14.4877	Success	0.0880167
1995	03_img141.jpg	PurpleMedicine	397	253	300	146	-13.1814	0.795774	7.80983	Success	0.0729997
1996	03_img141.jpg	Pepper	802	301	366	156	78.9179	0.637005	6.08157	Success	0.0922675
1997	03_img142.jpg	FruitKnife	381	237	440	256	-21.8096	0.838317	6.54682	Success	0.119002
1998	03_img142.jpg	LaptopClean	429	413	442	174	-47.7653	0.144512	86.0064	Fail	0.127027
[truncated: 405 more rows]
