# Supplementary material for: Robot Arm Grasping Using Learning-Based Template Matching and Self-Rotation Learning Network
Source: Research Square preprint supplement (doi:10.21203/rs.3.rs-1402918/v1), 2022-03-08
Supplement: Supplementary file 2 [file 268dbe4fb58ce82a854ec929.xlsx]

## Sheet: Rot_Grasp_SIFT_03
The Practical Grasping of The SIFT Method on Rotation Dataset - 3 Objects
No.	Search_Name	Template	CenterX	CenterY	Width	Height	Angle	Timing	Grasp Result
1	Img_15-08-2021 20-08-47	ABBottle	338	689	474	186	39.9291	1.47433	success
2	Img_15-08-2021 20-09-00	Pepper	847	655	366	156	-43.1915	1.10661	success
3	Img_15-08-2021 20-09-13	HandClean	402	246	392	214	9.59509	1.17106	success
4	Img_15-08-2021 20-09-30	ABBottle	265	673	474	186	-68.5288	1.1499	success
5	Img_15-08-2021 20-09-43	Pepper	531	343	366	156	-63.8365	1.12656	success
6	Img_15-08-2021 20-09-56	HandClean	883	646	392	214	56.7812	1.16729	success
7	Img_15-08-2021 20-10-13	ABBottle	936	528	474	186	39.5187	1.1328	success
8	Img_15-08-2021 20-10-25	Pepper	508	796	366	156	10.3988	1.08222	success
9	Img_15-08-2021 20-10-38	HandClean	412	455	392	214	55.0245	1.07656	success
10	Img_15-08-2021 20-10-58	ABBottle	546	630	474	186	47.3363	1.16341	success
11	Img_15-08-2021 20-11-10	Pepper	954	746	366	156	80.626	1.06765	success
12	Img_15-08-2021 20-11-24	HandClean	472	245	392	214	46.9251	1.0762	success
13	Img_15-08-2021 20-11-41	ABBottle	158	702	474	186	38.7538	1.18726	success
14	Img_15-08-2021 20-11-54	Pepper	595	620	366	156	37.3228	1.1129	success
15	Img_15-08-2021 20-12-06	HandClean	361	196	392	214	-54.4407	1.08382	success
16	Img_15-08-2021 20-12-39	Yogurt	880	519	478	196	-88.5067	1.06318	success
17	Img_15-08-2021 20-12-51	Shampoo	383	240	448	170	-33.7076	1.0518	success
18	Img_15-08-2021 20-13-04	RedMedicine	350	686	324	142	12.3916	0.998809	success
19	Img_15-08-2021 20-13-19	Yogurt	809	647	478	196	39.1716	1.0657	success
20	Img_15-08-2021 20-13-32	Shampoo	227	522	448	170	-50.3401	1.02721	success
21	Img_15-08-2021 20-13-45	RedMedicine	609	277	324	142	78.7082	1.01932	success
22	Img_15-08-2021 20-14-00	Yogurt	947	612	478	196	-68.2314	1.05757	success
23	Img_15-08-2021 20-14-13	Shampoo	361	681	448	170	34.0622	0.99608	success
24	Img_15-08-2021 20-14-26	RedMedicine	376	254	324	142	-67.481	0.984761	success
25	Img_15-08-2021 20-14-43	Yogurt	322	395	478	196	62.5764	1.06434	success
26	Img_15-08-2021 20-14-55	Shampoo	526	735	448	170	12.0048	1.0605	success
27	Img_15-08-2021 20-15-08	RedMedicine	856	440	324	142	-60.739	0.96934	success
28	Img_15-08-2021 20-15-27	Yogurt	518	756	478	196	-42.9837	1.1204	success
29	Img_15-08-2021 20-15-40	Shampoo	404	312	448	170	42.3983	1.02328	success
30	Img_15-08-2021 20-15-53	RedMedicine	877	422	324	142	-79.5914	0.998278	success
31	Img_15-08-2021 20-17-38	FruitKnife	867	547	431	252	-43.0275	1.03293	success
32	Img_15-08-2021 20-17-51	LaptopClean	393	257	442	174	-0.746856	0.97897	success
33	Img_15-08-2021 20-18-04	Glue	403	716	488	230	67.8923	1.03361	success
34	Img_15-08-2021 20-18-20	FruitKnife	438	289	431	252	-9.83028	0.995041	success
35	Img_15-08-2021 20-18-33	LaptopClean	829	477	442	174	-57.6816	0.953501	success
36	Img_15-08-2021 20-18-45	Glue	383	658	488	230	62.0223	0.998634	success
37	Img_15-08-2021 20-18-59	FruitKnife	0	0	0	0	0	0	fail
38	Img_15-08-2021 20-19-00	LaptopClean	938	520	442	174	-71.0562	1.02645	success
39	Img_15-08-2021 20-19-13	Glue	462	228	488	230	-39.3038	0.989418	success
40	Img_15-08-2021 20-19-31	FruitKnife	0	0	0	0	0	0	fail
41	Img_15-08-2021 20-19-32	LaptopClean	489	682	442	174	74.7583	1.02116	success
42	Img_15-08-2021 20-19-44	Glue	930	433	488	230	-58.8066	1.02876	success
43	Img_15-08-2021 20-20-30	FruitKnife	0	0	0	0	0	0	fail
44	Img_15-08-2021 20-20-31	LaptopClean	747	717	442	174	-47.1239	1.00899	success
45	Img_15-08-2021 20-20-43	Glue	928	280	488	230	9.87172	1.0216	success
46	Img_15-08-2021 20-21-11	GreenSoap	395	311	396	274	5.30723	0.993418	success
47	Img_15-08-2021 20-21-24	DrillCover	0	0	0	0	0	0	fail
48	Img_15-08-2021 20-21-25	GreenGlue	0	0	0	0	0	0	fail
49	Img_15-08-2021 20-21-34	GreenSoap	901	414	396	274	88.8762	1.00432	success
50	Img_15-08-2021 20-21-46	DrillCover	0	0	0	0	0	0	fail
51	Img_15-08-2021 20-21-47	GreenGlue	0	0	0	0	0	0	fail
52	Img_15-08-2021 20-21-58	GreenSoap	834	615	396	274	-33.8073	1.05335	success
53	Img_15-08-2021 20-22-11	DrillCover	924	318	463	141	-19.8093	0.987208	fail
54	Img_15-08-2021 20-22-24	GreenGlue	357	796	509	127	-65.8444	0.997436	success
55	Img_15-08-2021 20-22-41	GreenSoap	230	399	396	274	41.4456	0.970514	success
56	Img_15-08-2021 20-22-55	DrillCover	808	659	463	141	-12.2803	0.894072	success
57	Img_15-08-2021 20-23-07	GreenGlue	0	0	0	0	0	0	fail
58	Img_15-08-2021 20-23-18	GreenSoap	419	279	396	274	-77.4392	0.99922	success
59	Img_15-08-2021 20-23-30	DrillCover	512	832	463	141	-5.83882	0.913488	success
60	Img_15-08-2021 20-23-43	GreenGlue	0	0	0	0	0	0	fail
61	Img_15-08-2021 20-24-20	T1	457	236	440	114	43.6414	0.985271	success
62	Img_15-08-2021 20-24-32	PurpleMedicine	881	557	300	146	-44.6443	1.00234	success
63	Img_15-08-2021 20-24-45	Xisat	361	676	526	144	-26.0675	0.95481	success
64	Img_15-08-2021 20-25-03	T1	797	312	440	114	-5.19867	0.997529	success
65	Img_15-08-2021 20-25-04	PurpleMedicine	884	659	300	146	26.5913	1.02219	success
66	Img_15-08-2021 20-25-17	Xisat	536	291	526	144	-61.8139	0.945974	success
67	Img_15-08-2021 20-25-34	T1	865	456	440	114	-29.2459	1.05003	success
68	Img_15-08-2021 20-25-35	PurpleMedicine	275	620	300	146	38.6601	0.977662	success
69	Img_15-08-2021 20-25-47	Xisat	600	324	526	144	-32.3178	0.944884	success
70	Img_15-08-2021 20-26-05	T1	0	0	0	0	0	0	fail
71	Img_15-08-2021 20-26-06	PurpleMedicine	389	713	300	146	-3.11577	1.04477	success
72	Img_15-08-2021 20-26-19	Xisat	879	515	526	144	-79.9997	0.938988	success
73	Img_15-08-2021 20-26-37	T1	0	0	0	0	0	0	fail
74	Img_15-08-2021 20-26-39	PurpleMedicine	127	233	300	146	-80.092	1.00811	success
75	Img_15-08-2021 20-26-52	Xisat	483	364	526	144	51.9543	0.958935	success
76	Img_15-08-2021 20-28-55	Block	408	736	302	125	-31.3778	0.934442	success
77	Img_15-08-2021 20-29-07	MilkBottle	0	0	0	0	0	0	fail
78	Img_15-08-2021 20-29-08	SmallMedicine	370	224	260	158	-19.9504	0.962943	success
79	Img_15-08-2021 20-29-31	Block	0	0	0	0	0	0	fail
80	Img_15-08-2021 20-29-32	MilkBottle	0	0	0	0	0	0	fail
81	Img_15-08-2021 20-29-33	SmallMedicine	403	251	260	158	-53.5118	0.955651	success
82	Img_15-08-2021 20-29-51	Block	872	687	302	125	-15.924	0.954231	success
83	Img_15-08-2021 20-29-52	MilkBottle	0	0	0	0	0	0	fail
84	Img_15-08-2021 20-29-53	SmallMedicine	855	562	260	158	-83.1241	0.940215	success
85	Img_15-08-2021 20-30-09	Block	0	0	0	0	0	0	fail
86	Img_15-08-2021 20-30-10	MilkBottle	0	0	0	0	0	0	fail
87	Img_15-08-2021 20-30-11	SmallMedicine	354	260	260	158	-47.0224	0.918901	success
88	Img_15-08-2021 20-30-31	Block	890	717	302	125	-18.7555	0.89805	success
89	Img_15-08-2021 20-30-44	MilkBottle	0	0	0	0	0	0	fail
90	Img_15-08-2021 20-30-45	SmallMedicine	646	270	260	158	-82.2882	0.851559	success
91	Img_15-08-2021 20-31-16	PaperKnife	0	0	0	0	0	0	fail
92	Img_15-08-2021 20-31-29	O2	201	542	438	184	-86.848	0.960933	success
93	Img_15-08-2021 20-31-43	Softwash	622	871	376	258	-23.9632	0.884252	success
94	Img_15-08-2021 20-32-00	PaperKnife	0	0	0	0	0	0	fail
95	Img_15-08-2021 20-32-01	O2	476	731	438	184	8.3053	0.970211	success
96	Img_15-08-2021 20-32-14	Softwash	0	0	0	0	0	0	fail
97	Img_15-08-2021 20-32-26	PaperKnife	336	713	550	153	25.6376	0.941585	success
98	Img_15-08-2021 20-32-38	O2	826	481	438	184	-61.5371	0.969748	success
99	Img_15-08-2021 20-32-50	Softwash	605	598	376	258	-52.8051	0.878864	success
100	Img_15-08-2021 20-33-06	PaperKnife	917	610	550	153	-7.43879	0.901361	success
101	Img_15-08-2021 20-33-19	O2	0	0	0	0	0	0	fail
102	Img_15-08-2021 20-33-20	Softwash	0	0	0	0	0	0	fail
103	Img_15-08-2021 20-34-02	PaperKnife	348	707	550	153	-24.8671	1.07953	success
104	Img_15-08-2021 20-34-15	O2	287	274	438	184	-6.46447	1.02403	success
105	Img_15-08-2021 20-34-28	Softwash	915	807	376	258	-3.68042	1.0066	success
106	Img_15-08-2021 20-35-08	CokeBottle	0	0	0	0	0	0	fail
107	Img_15-08-2021 20-35-30	CokeBottle	0	0	0	0	0	0	fail
108	Img_15-08-2021 20-35-50	CokeBottle	0	0	0	0	0	0	fail
109	Img_15-08-2021 20-36-19	CokeBottle	0	0	0	0	0	0	fail
110	Img_15-08-2021 20-36-37	CokeBottle	0	0	0	0	0	0	fail
Average Timing								0.758598	81
"Success" Grasping Percentage									0.736364
