# Supplementary material for: Robot Arm Grasping Using Learning-Based Template Matching and Self-Rotation Learning Network
Source: Research Square preprint supplement (doi:10.21203/rs.3.rs-1402918/v1), 2022-03-08
Supplement: Supplementary file 3 [file 404de1959d362c427f27836d.xlsx]

## Sheet: Rot_Grasp_ORB_04
The Practical Grasping of The ORB Method on Rotation Dataset - 4 Objects
No.	Search_Name	Template	CenterX	CenterY	Width	Height	Angle	Timing	Grasp
1	Img_17-08-2021 00-34-31	GreenGlue	0	0	0	0	0	0	fail
2	Img_17-08-2021 00-34-31	Pepper	923	394	366	156	58.6866	0.136991	success
3	Img_17-08-2021 00-34-43	PurpleMedicine	131	807	300	146	42.5844	0.125716	success
4	Img_17-08-2021 00-34-56	Xisat	717	796	526	144	-26.4867	0.12658	success
5	Img_17-08-2021 00-35-11	GreenGlue	0	0	0	0	0	0	fail
6	Img_17-08-2021 00-35-11	Pepper	621	728	366	156	62.2305	0.137702	success
7	Img_17-08-2021 00-35-23	PurpleMedicine	714	396	300	146	-47.7329	0.149033	success
8	Img_17-08-2021 00-35-35	Xisat	144	712	526	144	75.8363	0.10085	success
9	Img_17-08-2021 00-35-53	GreenGlue	0	0	0	0	0	0	fail
10	Img_17-08-2021 00-35-53	Pepper	368	648	366	156	-81.7362	0.148523	success
11	Img_17-08-2021 00-36-05	PurpleMedicine	156	330	300	146	19.1107	0.124716	success
12	Img_17-08-2021 00-36-18	Xisat	647	349	526	144	-48.4677	0.120929	success
13	Img_17-08-2021 00-36-43	GreenGlue	0	0	0	0	0	0	fail
14	Img_17-08-2021 00-36-43	Pepper	696	575	366	156	87.5297	0.157807	success
15	Img_17-08-2021 00-36-54	PurpleMedicine	1010	398	300	146	44.2894	0.126999	success
16	Img_17-08-2021 00-37-07	Xisat	277	303	526	144	-50.3921	0.112911	success
17	Img_17-08-2021 00-37-25	GreenGlue	0	0	0	0	0	0	fail
18	Img_17-08-2021 00-37-25	Pepper	139	298	366	156	-85.9961	0.152736	success
19	Img_17-08-2021 00-37-38	PurpleMedicine	739	302	300	146	-78.9236	0.134979	success
20	Img_17-08-2021 00-37-50	Xisat	697	815	526	144	-50.2901	0.115027	success
21	Img_17-08-2021 00-38-24	Block	0	0	0	0	0	0	fail
22	Img_17-08-2021 00-38-24	LaptopClean	876	699	442	174	-25.2063	0.21696	success
23	Img_17-08-2021 00-38-36	RedMedicine	923	280	324	142	62.7897	0.165911	success
24	Img_17-08-2021 00-38-48	Yogurt	382	368	478	196	57.9934	0.13174	success
25	Img_17-08-2021 00-39-07	Block	0	0	0	0	0	0	fail
26	Img_17-08-2021 00-39-07	LaptopClean	275	745	442	174	-77.8359	0.139196	success
27	Img_17-08-2021 00-39-19	RedMedicine	233	285	324	142	-29.5243	0.139644	success
28	Img_17-08-2021 00-39-32	Yogurt	780	315	478	196	74.6235	0.149993	success
29	Img_17-08-2021 00-39-49	Block	0	0	0	0	0	0	fail
30	Img_17-08-2021 00-39-49	LaptopClean	876	326	442	174	66.0715	0.132365	success
31	Img_17-08-2021 00-40-01	RedMedicine	197	269	324	142	-23.1709	0.114438	success
32	Img_17-08-2021 00-40-14	Yogurt	496	786	478	196	-82.9283	0.11995	success
33	Img_17-08-2021 00-41-23	Block	0	0	0	0	0	0	fail
34	Img_17-08-2021 00-41-23	LaptopClean	932	514	442	174	-52.1335	0.148294	success
35	Img_17-08-2021 00-41-35	RedMedicine	139	663	324	142	-36.9794	0.121863	success
36	Img_17-08-2021 00-41-48	Yogurt	528	483	478	196	-86.83	0.133438	success
37	Img_17-08-2021 00-42-10	Block	0	0	0	0	0	0	fail
38	Img_17-08-2021 00-42-10	LaptopClean	620	708	442	174	-63.5462	0.138305	success
39	Img_17-08-2021 00-42-22	RedMedicine	189	597	324	142	56.6528	0.12484	success
40	Img_17-08-2021 00-42-34	Yogurt	868	434	478	196	-85.2952	0.131946	success
41	Img_17-08-2021 00-44-19	SmallMedicine	506	280	260	158	-78.0144	0.127995	success
42	Img_17-08-2021 00-44-19	T1	0	0	0	0	0	0	fail
43	Img_17-08-2021 00-44-31	O2	938	432	438	184	-77.5081	0.148008	success
44	Img_17-08-2021 00-44-43	HandClean	696	747	392	214	-53.8315	0.166537	success
45	Img_17-08-2021 00-44-58	O2	840	374	438	184	-87.2599	0.161888	success
46	Img_17-08-2021 00-44-58	SmallMedicine	0	0	0	0	0	0	fail
47	Img_17-08-2021 00-44-59	T1	0	0	0	0	0	0	fail
48	Img_17-08-2021 00-45-10	HandClean	210	280	392	214	36.4089	0.173343	success
49	Img_17-08-2021 00-45-27	SmallMedicine	587	506	260	158	-88.7473	0.133229	success
50	Img_17-08-2021 00-45-27	T1	0	0	0	0	0	0	fail
51	Img_17-08-2021 00-45-38	O2	304	24	438	184	-11.7206	0.148998	success
52	Img_17-08-2021 00-45-51	HandClean	1008	714	392	214	-55.8672	0.159667	success
53	Img_17-08-2021 00-46-37	SmallMedicine	832	459	438	184	17.3465	0.161025	success
54	Img_17-08-2021 00-46-37	T1	0	0	0	0	0	0	fail
55	Img_17-08-2021 00-46-49	HandClean	440	399	392	214	44.0729	0.176957	success
56	Img_17-08-2021 00-46-49	O2	873	299	438	184	-82.2519	0.158974	success
57	Img_17-08-2021 00-47-37	O2	1003	397	260	158	-77.8676	0.127985	success
58	Img_17-08-2021 00-47-37	SmallMedicine	0	0	0	0	0	0	fail
59	Img_17-08-2021 00-47-37	T1	0	0	0	0	0	0	fail
60	Img_17-08-2021 00-47-49	HandClean	616	305	392	214	34.5023	0.170806	success
61	Img_17-08-2021 00-48-34	FruitKnife	0	0	0	0	0	0	fail
62	Img_17-08-2021 00-48-34	GreenSoap	261	678	396	274	89.707	0.154577	success
63	Img_17-08-2021 00-48-46	ABBottle	915	325	474	186	-30.7246	0.142171	success
64	Img_17-08-2021 00-48-59	Shampoo	310	221	448	170	-29.9801	0.12142	success
65	Img_17-08-2021 00-49-18	FruitKnife	0	0	0	0	0	0	fail
66	Img_17-08-2021 00-49-19	GreenSoap	862	295	396	274	-31.5873	0.135561	success
67	Img_17-08-2021 00-49-30	ABBottle	341	288	474	186	42.4401	0.148105	success
68	Img_17-08-2021 00-49-43	Shampoo	882	735	448	170	-52.4166	0.125817	success
69	Img_17-08-2021 00-50-08	FruitKnife	1066	745	431	252	-27.0991	0.122586	success
70	Img_17-08-2021 00-50-20	GreenSoap	184	309	396	274	45.1801	0.153146	success
71	Img_17-08-2021 00-50-33	ABBottle	861	273	474	186	54.2271	0.141202	success
72	Img_17-08-2021 00-50-45	Shampoo	431	742	448	170	-31.5844	0.134207	success
73	Img_17-08-2021 00-51-02	FruitKnife	0	0	0	0	0	0	fail
74	Img_17-08-2021 00-51-02	GreenSoap	893	336	396	274	-78.5487	0.140845	success
75	Img_17-08-2021 00-51-14	ABBottle	365	677	474	186	-82.1322	0.146767	success
76	Img_17-08-2021 00-51-25	Shampoo	434	200	448	170	-6.19891	0.112202	success
77	Img_17-08-2021 00-51-51	FruitKnife	0	0	0	0	0	0	fail
78	Img_17-08-2021 00-51-51	GreenSoap	409	251	396	274	84.0861	0.147487	success
79	Img_17-08-2021 00-52-04	ABBottle	977	375	474	186	18.8992	0.160312	success
80	Img_17-08-2021 00-52-16	Shampoo	900	744	448	170	-51.6853	0.144856	success
81	Img_17-08-2021 00-53-35	CokeBottle	0	0	0	0	0	0	fail
82	Img_17-08-2021 00-53-35	Glue	380	649	488	230	48.7213	0.154563	success
83	Img_17-08-2021 00-53-35	Softwash	0	0	0	0	0	0	fail
84	Img_17-08-2021 00-53-53	CokeBottle	0	0	0	0	0	0	fail
85	Img_17-08-2021 00-53-53	Glue	736	510	488	230	-70.45	0.144957	success
86	Img_17-08-2021 00-53-53	Softwash	0	0	0	0	0	0	fail
87	Img_17-08-2021 00-54-09	CokeBottle	0	0	0	0	0	0	fail
88	Img_17-08-2021 00-54-09	Glue	757	385	488	230	30.6555	0.148958	success
89	Img_17-08-2021 00-54-09	Softwash	0	0	0	0	0	0	fail
90	Img_17-08-2021 00-54-26	CokeBottle	0	0	0	0	0	0	fail
91	Img_17-08-2021 00-54-26	Glue	883	621	488	230	33.5327	0.145996	success
92	Img_17-08-2021 00-54-26	Softwash	0	0	0	0	0	0	fail
93	Img_17-08-2021 00-54-45	CokeBottle	0	0	0	0	0	0	fail
94	Img_17-08-2021 00-54-45	Glue	396	774	488	230	-16.3987	0.159223	success
95	Img_17-08-2021 00-54-45	Softwash	0	0	0	0	0	0	fail
96	Img_17-08-2021 00-56-09	DrillCover	982	609	463	141	-34.4613	0.104749	success
97	Img_17-08-2021 00-56-09	MilkBottle	0	0	0	0	0	0	fail
98	Img_17-08-2021 00-56-22	PaperKnife	0	0	0	0	0	0	fail
99	Img_17-08-2021 00-56-31	MilkBottle	0	0	0	0	0	0	fail
100	Img_17-08-2021 00-56-32	DrillCover	802	418	463	141	-27.9176	0.115846	success
101	Img_17-08-2021 00-56-44	PaperKnife	922	736	550	153	10.6414	0.128004	success
102	Img_17-08-2021 00-57-25	MilkBottle	0	0	0	0	0	0	fail
103	Img_17-08-2021 00-57-26	DrillCover	396	712	463	141	-32.4268	0.11118	success
104	Img_17-08-2021 00-57-38	PaperKnife	0	0	0	0	0	0	fail
105	Img_17-08-2021 00-58-06	MilkBottle	0	0	0	0	0	0	fail
106	Img_17-08-2021 00-58-07	DrillCover	291	797	463	141	-69.9383	0.105432	success
107	Img_17-08-2021 00-58-09	PaperKnife	849	777	550	153	-36.6406	0.134573	success
108	Img_17-08-2021 00-59-11	MilkBottle	0	0	0	0	0	0	fail
109	Img_17-08-2021 00-59-11	DrillCover	960	732	463	141	-37.3461	0.114691	success
110	Img_17-08-2021 00-59-13	PaperKnife	929	743	550	153	5.23979	0.131826	success
Average Timing								0.091155	72
"Success" Grasping Percentage									0.654545
