# Supplementary material for: Robot Arm Grasping Using Learning-Based Template Matching and Self-Rotation Learning Network
Source: Research Square preprint supplement (doi:10.21203/rs.3.rs-1402918/v1), 2022-03-08
Supplement: Supplementary file 4 [file f1ae9c2e624ae2c8c597fcd4.xlsx]

## Sheet: 00_OrBbx_Grasping2400_OneObject
The Experimental Results of SIFT on Rotation Dataset
No.	Search_Name	Template	CenterX	CenterY	Width	Height	Angle	IoU	Angle Error	Grasping Result	Timing
1	00_img0.jpg	Shampoo	368	578	448	170	-60.1569	0.935372	2.4138	Success	0.352592
2	00_img1.jpg	PurpleMedicine	383	465	300	146	-38.4679	0.730508	8.33708	Success	0.30197
3	00_img10.jpg	O2	516	452	438	184	-13.9535	0.919976	3.37322	Success	0.321998
4	00_img100.jpg	LaptopClean	818	415	442	174	-61.6706	0.835547	3.06658	Success	0.357999
5	00_img101.jpg	GreenSoap	566	567	396	274	67.7416	0.975355	0.831537	Success	0.329001
6	00_img102.jpg	Glue	257	332	488	230	-62.5473	0.902199	0.822687	Success	0.361
7	00_img103.jpg	Glue	353	486	488	230	-40.3662	0.963702	0.681979	Success	0.408001
8	00_img104.jpg	FruitKnife	779	604	440	256	70.7652	0.795906	9.83492	Success	0.407001
9	00_img105.jpg	PaperKnife	942	393	532	146	80.9752	0.309512	35.2101	Fail	0.395998
10	00_img106.jpg	Xisat	856	413	526	144	-40.6283	0.923704	0.785317	Success	0.392917
11	00_img107.jpg	Xisat	698	346	526	144	-65.5514	0.951725	0.684216	Success	0.444518
12	00_img108.jpg	Yogurt	696	627	478	196	-39.5059	0.920379	2.21575	Success	0.409003
13	00_img109.jpg	Yogurt	660	406	478	196	-28.1374	0.933886	2.14952	Success	0.509001
14	00_img11.jpg	Block	0	0	278	120	0	0	46.8457	Fail	0.395
15	00_img110.jpg	O2	433	568	438	184	-60.8056	0.917552	2.95134	Success	0.405919
16	00_img111.jpg	Shampoo	786	436	448	170	-64.9653	0.931523	0.00440273	Success	0.404977
17	00_img112.jpg	Shampoo	526	664	448	170	-13.4004	0.949951	0.189739	Success	0.393998
18	00_img113.jpg	SmallMedicine	575	532	260	158	-62.6303	0.928817	3.63758	Success	0.472001
19	00_img114.jpg	Glue	701	557	488	230	-35.2705	0.912235	3.59276	Success	0.502194
20	00_img115.jpg	HandClean	1009	659	392	214	54.3885	0.930315	2.85685	Success	0.636516
21	00_img116.jpg	GreenGlue	0	0	494	106	0	0	75.5079	Fail	0.376032
22	00_img117.jpg	ABBottle	730	397	474	186	-75.2978	0.763743	2.21575	Success	0.411999
23	00_img118.jpg	PaperKnife	723	489	532	146	-36.2451	0.939081	1.42066	Success	0.375862
24	00_img119.jpg	Yogurt	662	452	478	196	-52.9882	0.918649	2.05874	Success	0.384995
25	00_img12.jpg	T1	484	540	432	114	-3.41695	0.61169	11.8398	Success	0.376999
26	00_img120.jpg	FruitKnife	679	376	440	256	71.3331	0.838268	5.48476	Success	0.356046
27	00_img121.jpg	T1	291	461	432	114	-49.7748	0.00889912	3.00028	Fail	0.400997
28	00_img122.jpg	FruitKnife	869	332	440	256	-84.9232	0.689938	22.2221	Success	0.376014
29	00_img123.jpg	Yogurt	461	464	478	196	-28.9012	0.929666	1.17323	Success	0.320002
30	00_img124.jpg	Pepper	685	586	366	156	-19.3619	0.875851	0.258498	Success	0.310005
31	00_img125.jpg	RedMedicine	353	549	324	142	-74.0506	0.850633	4.28772	Success	0.311977
32	00_img126.jpg	PurpleMedicine	762	593	300	146	-19.4768	0.916116	0.521174	Success	0.306001
33	00_img127.jpg	ABBottle	644	451	474	186	-70.384	0.675911	4.64039	Success	0.350001
34	00_img128.jpg	HandClean	471	384	392	214	-27.8784	0.917759	1.54769	Success	0.390001
35	00_img129.jpg	LaptopClean	897	345	442	174	3.38018	0.806364	6.49793	Success	0.32226
36	00_img13.jpg	ABBottle	501	472	474	186	-54.0765	0.856751	3.51553	Success	0.310973
37	00_img130.jpg	Shampoo	666	394	448	170	-55.6389	0.918676	2.79692	Success	0.304031
38	00_img131.jpg	PaperKnife	385	507	532	146	-45.7548	0.75138	7.28148	Success	0.309998
39	00_img132.jpg	T1	480	565	432	114	-82.1212	0.345937	8.813	Success	0.297216
40	00_img133.jpg	HandClean	394	487	392	214	-28.8189	0.95781	0.852783	Success	0.352077
41	00_img134.jpg	Xisat	667	382	526	144	-59.0897	0.915957	1.22766	Success	0.298996
42	00_img135.jpg	FruitKnife	587	426	440	256	89.6726	0.763492	14.5537	Success	0.307999
43	00_img136.jpg	GreenSoap	755	410	396	274	62.9622	0.938645	0.533969	Success	0.299036
44	00_img137.jpg	GreenGlue	0	0	494	106	0	0	41.441	Fail	0.276052
45	00_img138.jpg	Yogurt	458	563	478	196	-66.1404	0.897397	3.55334	Success	0.321972
46	00_img139.jpg	Xisat	627	451	526	144	-33.6217	0.884562	0.315351	Success	0.300999
47	00_img14.jpg	O2	428	541	438	184	-3.63206	0.814993	8.38929	Success	0.302003
48	00_img140.jpg	ABBottle	593	516	474	186	-44.9534	0.906758	2.1046	Success	0.317998
49	00_img141.jpg	ABBottle	569	453	474	186	-61.4278	0.862004	1.19498	Success	0.30902
50	00_img142.jpg	Yogurt	650	399	478	196	-75.4318	0.964974	0.406968	Success	0.303974
51	00_img143.jpg	MilkBottle	0	0	532	238	0	0	47.9805	Fail	0.307974
52	00_img144.jpg	RedMedicine	564	405	324	142	-65.4322	0.853203	3.79351	Success	0.322976
53	00_img145.jpg	SmallMedicine	404	484	260	158	24.6668	0.796883	13.7428	Success	0.315002
54	00_img146.jpg	Shampoo	693	494	448	170	1.51973	0.920505	2.66753	Success	0.317974
55	00_img147.jpg	Xisat	682	563	526	144	-27.5891	0.906192	1.14659	Success	0.294002
56	00_img148.jpg	O2	465	545	438	184	-88.2227	0.852434	6.88442	Success	0.304028
57	00_img149.jpg	GreenSoap	690	508	396	274	29.0711	0.919834	2.36279	Success	0.32397
58	00_img15.jpg	RedMedicine	991	269	324	142	79.267	0.817544	1.53944	Success	0.339999
59	00_img150.jpg	GreenGlue	426	548	494	106	-27.3702	0	29.2766	Fail	0.302972
60	00_img151.jpg	Shampoo	436	538	448	170	-21.2917	0.900414	0.128615	Success	0.329998
61	00_img152.jpg	Glue	558	593	488	230	-45.0926	0.913994	4.13488	Success	0.324029
62	00_img153.jpg	GreenSoap	444	350	396	274	-16.9939	0.840218	3.05341	Success	0.328025
63	00_img154.jpg	Glue	529	439	488	230	-25.0481	0.877221	4.14904	Success	0.329014
64	00_img155.jpg	CokeBottle	0	0	576	202	0	0	37.3136	Fail	0.306
65	00_img156.jpg	PurpleMedicine	453	561	300	146	62.549	0.671564	21.0773	Success	0.293997
66	00_img157.jpg	Block	373	343	278	120	-40.7839	0.866468	1.64478	Success	0.279999
67	00_img158.jpg	MilkBottle	288	304	532	238	-46.6077	0.0274001	2.11702	Fail	0.315856
68	00_img159.jpg	Yogurt	715	434	478	196	-57.2914	0.976444	0.448555	Success	0.312006
69	00_img16.jpg	LaptopClean	1032	351	442	174	82.8917	0.891036	0.96387	Success	0.291976
70	00_img160.jpg	CokeBottle	0	0	576	202	0	0	24.3273	Fail	0.289
71	00_img161.jpg	Glue	320	608	488	230	-69.8134	0.934261	0.469269	Success	0.32297
72	00_img162.jpg	GreenSoap	847	299	396	274	43.453	0.965677	0.241125	Success	0.308025
73	00_img163.jpg	RedMedicine	605	385	324	142	-73.8407	0.849177	3.56094	Success	0.300999
74	00_img164.jpg	GreenSoap	406	467	396	274	-36.5965	0.915184	0.0617633	Success	0.311512
75	00_img165.jpg	GreenSoap	510	603	396	274	51.5775	0.913599	0.00928349	Success	0.296976
76	00_img166.jpg	FruitKnife	577	408	440	256	-76.4495	0.903026	3.36633	Success	0.312999
77	00_img167.jpg	LaptopClean	352	440	442	174	-47.7569	0.832622	3.17072	Success	0.321034
78	00_img168.jpg	T1	526	552	432	114	-30.2827	0.164837	68.8116	Fail	0.309011
79	00_img169.jpg	Yogurt	592	368	478	196	-46.5051	0.8471	1.19993	Success	0.312978
80	00_img17.jpg	RedMedicine	481	361	324	142	-52.0387	0.850268	3.24254	Success	0.313008
81	00_img170.jpg	GreenGlue	0	0	494	106	0	0	56.9116	Fail	0.282991
82	00_img171.jpg	Pepper	680	276	366	156	7.32015	0.894433	0.196749	Success	0.304631
83	00_img172.jpg	ABBottle	586	495	474	186	-65.5582	0.873357	5.51816	Success	0.315017
84	00_img173.jpg	FruitKnife	533	596	440	256	24.5691	0.817774	7.71814	Success	0.315995
85	00_img174.jpg	LaptopClean	475	578	442	174	-15.9084	0.921701	1.22213	Success	0.311974
86	00_img175.jpg	Pepper	924	645	366	156	-78.1073	0.830893	4.86287	Success	0.311054
87	00_img176.jpg	RedMedicine	568	540	324	142	-40.9339	0.882367	0.551745	Success	0.304972
88	00_img177.jpg	Block	831	426	278	120	-46.45	0.774811	1.45261	Success	0.285972
89	00_img178.jpg	PaperKnife	506	448	532	146	-22.3963	0.891123	2.59402	Success	0.323992
90	00_img179.jpg	Pepper	484	463	366	156	88.7642	0.857584	6.58082	Success	0.306777
91	00_img18.jpg	T1	500	648	432	114	81.9078	0.175343	62.1825	Fail	0.311469
92	00_img180.jpg	O2	369	631	438	184	-21.5992	0.745878	9.33814	Success	0.363959
93	00_img181.jpg	O2	498	414	438	184	-44.1453	0.885733	0.459056	Success	0.378059
94	00_img182.jpg	PurpleMedicine	880	382	300	146	-69.0114	0.960731	0.887949	Success	0.388293
95	00_img183.jpg	O2	662	342	438	184	-68.1267	0.952642	1.10166	Success	0.359997
96	00_img184.jpg	O2	731	506	438	184	76.5493	0.847411	6.27333	Success	0.306482
97	00_img185.jpg	PurpleMedicine	754	340	300	146	-24.4227	0.887334	2.55263	Success	0.425513
98	00_img186.jpg	O2	310	579	438	184	-63.3943	0.844383	5.33722	Success	0.352165
99	00_img187.jpg	Glue	492	321	488	230	-69.3	0.880193	2.0672	Success	0.350013
100	00_img188.jpg	ABBottle	537	507	474	186	-48.9762	0.729881	2.63574	Success	0.341015
101	00_img189.jpg	Xisat	439	493	526	144	-39.0861	0.948546	0.153531	Success	0.324996
102	00_img19.jpg	Yogurt	681	362	478	196	-71.7973	0.934494	2.19941	Success	0.316998
103	00_img190.jpg	O2	798	351	438	184	-85.7106	0.89714	4.67999	Success	0.330008
104	00_img191.jpg	O2	373	554	438	184	84.3917	0.887048	1.69453	Success	0.324003
105	00_img192.jpg	Glue	471	444	488	230	-24.9539	0.939149	1.9522	Success	0.321031
106	00_img193.jpg	GreenGlue	0	0	494	106	0	0	68.725	Fail	0.323999
107	00_img194.jpg	MilkBottle	0	0	532	238	0	0	47.9405	Fail	0.309057
108	00_img195.jpg	PaperKnife	781	484	532	146	-28.7113	0.190159	38.5362	Fail	0.304035
109	00_img196.jpg	Shampoo	661	449	448	170	-69.5464	0.975749	0.796781	Success	0.323974
110	00_img197.jpg	LaptopClean	246	301	442	174	-62.5372	0.79332	3.17417	Success	0.320032
111	00_img198.jpg	Xisat	495	537	526	144	-26.9074	0.807919	1.05239	Success	0.338154
112	00_img199.jpg	LaptopClean	550	493	442	174	-35.6604	0.902938	2.92661	Success	0.369995
113	00_img2.jpg	T1	548	608	432	114	-47.2768	0.33847	13.9768	Success	0.401521
114	00_img20.jpg	RedMedicine	289	525	324	142	-39.0889	0.912955	1.20826	Success	0.336001
115	00_img200.jpg	Xisat	766	545	526	144	-32.6973	0.925822	0.846447	Success	0.315976
116	00_img201.jpg	ABBottle	611	428	474	186	84.441	0.848375	1.30757	Success	0.389853
117	00_img202.jpg	Pepper	554	527	366	156	-40.884	0.960996	0.789885	Success	0.342005
118	00_img203.jpg	FruitKnife	782	612	440	256	16.5997	0.760718	13.9425	Success	0.342829
119	00_img204.jpg	Yogurt	564	439	478	196	-64.0788	0.984562	0.104144	Success	0.332002
120	00_img205.jpg	GreenGlue	0	0	494	106	0	0	56.6192	Fail	0.320994
121	00_img206.jpg	Shampoo	710	413	448	170	-76.3474	0.932788	2.35129	Success	0.313866
122	00_img207.jpg	Block	0	0	278	120	0	0	54.017	Fail	0.297572
123	00_img208.jpg	Xisat	635	457	526	144	-45.7888	0.908873	1.598	Success	0.293971
124	00_img209.jpg	Block	618	326	278	120	-35.5229	0.917209	2.85354	Success	0.302022
125	00_img21.jpg	Xisat	544	571	526	144	-58.7793	0.914873	1.93842	Success	0.288028
126	00_img210.jpg	RedMedicine	692	445	324	142	-14.9658	0.843028	5.71632	Success	0.295997
127	00_img211.jpg	FruitKnife	733	623	440	256	25.2666	0.832923	4.06163	Success	0.313
128	00_img212.jpg	CokeBottle	0	0	576	202	0	0	24.2664	Fail	0.299011
129	00_img213.jpg	Pepper	636	489	366	156	-1.09095	0.902413	1.56931	Success	0.326607
130	00_img214.jpg	Glue	918	519	488	230	-55.8866	0.939424	2.14139	Success	0.356979
131	00_img215.jpg	RedMedicine	235	542	324	142	-72.3819	0.909752	3.1467	Success	0.303002
132	00_img216.jpg	Pepper	529	481	366	156	-48.4791	0.81696	2.94257	Success	0.322029
133	00_img217.jpg	SoftWash	678	448	390	264	-64.1571	0.937787	3.54465	Success	0.362998
134	00_img218.jpg	PaperKnife	532	582	532	146	-42.3701	0.750329	3.92025	Success	0.340014
135	00_img219.jpg	Pepper	363	373	366	156	-78.9231	0.722548	3.6832	Success	0.316977
136	00_img22.jpg	Yogurt	735	453	478	196	-60.446	0.802269	1.30468	Success	0.341065
137	00_img220.jpg	O2	507	453	438	184	-77.4827	0.915412	1.10813	Success	0.333075
138	00_img221.jpg	O2	527	439	438	184	-18.1901	0.888585	2.87887	Success	0.32991
139	00_img222.jpg	RedMedicine	307	539	324	142	-73.9319	0.957806	0.526796	Success	0.31
140	00_img223.jpg	GreenGlue	0	0	494	106	0	0	30.6808	Fail	0.300999
141	00_img224.jpg	ABBottle	574	408	474	186	-31.699	0.789841	0.297793	Success	0.37356
142	00_img225.jpg	Glue	389	503	488	230	-29.5756	0.924121	2.53601	Success	0.341035
143	00_img226.jpg	Block	0	0	278	120	0	0	43.3868	Fail	0.314484
144	00_img227.jpg	O2	850	513	438	184	-70.8728	0.824833	0.52797	Success	0.351999
145	00_img228.jpg	Shampoo	740	343	448	170	-64.4283	0.946654	1.37896	Success	0.313997
146	00_img229.jpg	O2	524	448	438	184	-49.3414	0.91185	0.272556	Success	0.314008
147	00_img23.jpg	RedMedicine	295	584	324	142	-60.1327	0.928585	2.8971	Success	0.317003
148	00_img230.jpg	RedMedicine	399	417	324	142	-78.3163	0.825282	0.0202633	Success	0.329037
149	00_img231.jpg	SoftWash	594	541	390	264	-33.8847	0.95819	0.863002	Success	0.310975
150	00_img232.jpg	PaperKnife	-3346	-1896	532	146	-18.6575	0	3.26118	Fail	0.327001
151	00_img233.jpg	Glue	855	589	488	230	-10.0944	0.947385	1.40674	Success	0.350973
152	00_img234.jpg	T1	463	516	432	114	-42.0589	0.740179	0.902359	Success	0.309998
153	00_img235.jpg	FruitKnife	701	448	440	256	-80.3449	0.861385	0.258668	Success	0.322007
154	00_img236.jpg	RedMedicine	605	600	324	142	-34.6152	0.847408	0.336616	Success	0.334975
155	00_img237.jpg	Yogurt	441	517	478	196	-17.1955	0.941037	2.21252	Success	0.316999
156	00_img238.jpg	PurpleMedicine	388	615	300	146	-6.64778	0.799497	11.0775	Success	0.301035
157	00_img239.jpg	Xisat	342	572	526	144	84.0764	0.771167	0.499286	Success	0.321998
158	00_img24.jpg	Xisat	506	392	526	144	-45.3819	0.941077	1.15853	Success	0.314806
159	00_img240.jpg	RedMedicine	639	575	324	142	-66.676	0.954844	0.668624	Success	0.340001
160	00_img241.jpg	Shampoo	567	550	448	170	-3.70003	0.959901	1.1979	Success	0.325974
161	00_img242.jpg	SmallMedicine	489	452	260	158	-59.4732	0.896572	4.82501	Success	0.302079
162	00_img243.jpg	SmallMedicine	577	354	260	158	-62.4996	0.948316	0.542558	Success	0.322998
163	00_img244.jpg	PaperKnife	447	663	532	146	-11.5845	0.81182	5.79315	Success	0.301975
164	00_img245.jpg	CokeBottle	0	0	576	202	0	0	81.981	Fail	0.307975
165	00_img246.jpg	FruitKnife	781	393	440	256	85.5631	0.761074	15.0627	Success	0.318998
166	00_img247.jpg	FruitKnife	672	535	440	256	28.3883	0.555758	47.5173	Fail	0.314
167	00_img248.jpg	PaperKnife	672	416	532	146	-81.3533	0.828095	3.50274	Success	0.300037
168	00_img249.jpg	GreenGlue	0	0	494	106	0	0	41.5119	Fail	0.286059
169	00_img25.jpg	RedMedicine	572	547	324	142	-23.5865	0.789139	9.82747	Success	0.31997
170	00_img250.jpg	O2	892	427	438	184	-48.6156	0.863526	6.09006	Success	0.313981
171	00_img251.jpg	FruitKnife	572	477	440	256	-11.8553	0.888561	4.58059	Success	0.317975
172	00_img252.jpg	RedMedicine	318	607	324	142	85.4714	0.820785	2.94432	Success	0.327013
173	00_img253.jpg	PaperKnife	578	399	532	146	-63.1335	0.838647	4.20737	Success	0.321974
174	00_img254.jpg	LaptopClean	623	467	442	174	-9.8853	0.74504	12.2811	Success	0.321999
175	00_img255.jpg	Pepper	371	555	366	156	77.6395	0.84867	3.8809	Success	0.322974
176	00_img256.jpg	Block	0	0	278	120	0	0	64.431	Fail	0.303037
177	00_img257.jpg	Shampoo	753	384	448	170	-59.7663	0.935476	2.1277	Success	0.321984
178	00_img258.jpg	CokeBottle	0	0	576	202	0	0	73.8543	Fail	0.306983
179	00_img259.jpg	O2	378	411	438	184	3.18485	0.813689	7.58304	Success	0.323987
180	00_img26.jpg	Xisat	441	599	526	144	-24.7088	0.976076	0.291942	Success	0.293976
181	00_img260.jpg	Shampoo	256	582	448	170	83.6567	0.946664	0.336889	Success	0.324988
182	00_img261.jpg	O2	832	474	438	184	-53.4642	0.921132	3.18809	Success	0.323999
183	00_img262.jpg	T1	388	635	432	114	-11.3622	0.769267	7.32344	Success	0.343998
184	00_img263.jpg	O2	669	522	438	184	-42.4043	0.922678	2.36676	Success	0.317998
185	00_img264.jpg	LaptopClean	638	366	442	174	-39.6032	0.855844	4.21801	Success	0.339028
186	00_img265.jpg	Shampoo	599	458	448	170	-1.65373	0.974973	0.553531	Success	0.310514
187	00_img266.jpg	O2	826	465	438	184	-34.6707	0.845887	0.514062	Success	0.310975
188	00_img267.jpg	O2	541	329	438	184	-49.7818	0.891171	0.310671	Success	0.317035
189	00_img268.jpg	GreenGlue	0	0	494	106	0	0	52.1694	Fail	0.324993
190	00_img269.jpg	Shampoo	764	403	448	170	-73.8065	0.898227	2.24639	Success	0.380513
191	00_img27.jpg	Yogurt	359	576	478	196	81.7473	0.92379	2.99615	Success	0.659998
192	00_img270.jpg	Shampoo	563	496	448	170	-41.9557	0.896644	3.39673	Success	0.417002
193	00_img271.jpg	PaperKnife	397	636	532	146	-14.3234	0.887186	2.49466	Success	0.330008
194	00_img272.jpg	O2	635	395	438	184	-62.1985	0.914323	3.34166	Success	0.336998
195	00_img273.jpg	T1	634	411	432	114	-68.9704	0.664198	7.52235	Success	0.303013
196	00_img274.jpg	LaptopClean	637	266	442	174	75.0995	0.800115	7.92399	Success	0.338001
197	00_img275.jpg	GreenSoap	888	577	396	274	64.3928	0.899122	3.34103	Success	0.314268
198	00_img276.jpg	Xisat	595	367	526	144	-48.5525	0.85384	2.18867	Success	0.327263
199	00_img277.jpg	O2	581	458	438	184	-41.903	0.884723	1.14605	Success	0.330976
200	00_img278.jpg	FruitKnife	723	521	440	256	72.821	0.81431	2.40029	Success	0.329558
201	00_img279.jpg	RedMedicine	401	494	324	142	-79.0799	0.809417	1.0196	Success	0.361704
202	00_img28.jpg	FruitKnife	516	512	440	256	75.9182	0.909966	4.39622	Success	0.317571
203	00_img280.jpg	RedMedicine	861	583	324	142	-43.7937	0.910273	0.938099	Success	0.345003
204	00_img281.jpg	PaperKnife	595	401	532	146	-14.8349	0.890725	3.34431	Success	0.321002
205	00_img282.jpg	RedMedicine	256	440	324	142	-63.6033	0.896427	1.3615	Success	0.363971
206	00_img283.jpg	CokeBottle	0	0	576	202	0	0	79.0073	Fail	0.329013
207	00_img284.jpg	HandClean	304	553	392	214	55.5934	0.88738	3.48241	Success	0.430513
208	00_img285.jpg	ABBottle	394	550	474	186	-11.0817	0.805359	5.89143	Success	0.358989
209	00_img286.jpg	Yogurt	475	605	478	196	-14.0297	0.915734	1.75907	Success	0.360519
210	00_img287.jpg	ABBottle	505	498	474	186	-41.6226	0.86164	1.34711	Success	0.448518
211	00_img288.jpg	ABBottle	694	449	474	186	-76.8015	0.76354	0.305779	Success	0.441998
212	00_img289.jpg	PaperKnife	765	505	532	146	-57.7021	0.880114	3.6898	Success	0.409001
213	00_img29.jpg	Block	662	519	278	120	54.2539	0.613467	11.1446	Success	0.616997
214	00_img290.jpg	HandClean	255	537	392	214	-39.2463	0.902647	5.30788	Success	0.695997
215	00_img291.jpg	O2	329	524	438	184	-24.0218	0.902665	3.54745	Success	0.366016
216	00_img292.jpg	Shampoo	895	400	448	170	-81.5808	0.933117	1.95526	Success	0.361554
217	00_img293.jpg	HandClean	586	422	392	214	-32.483	0.935388	1.61151	Success	0.434541
218	00_img294.jpg	Xisat	754	479	526	144	-40.727	0.86321	0.590448	Success	0.389972
219	00_img295.jpg	T1	400	506	432	114	-46.867	0.210829	16.7139	Fail	0.456997
220	00_img296.jpg	LaptopClean	516	341	442	174	-46.7173	0.844101	2.27918	Success	0.381994
221	00_img297.jpg	RedMedicine	532	573	324	142	-67.6767	0.951017	0.992208	Success	0.415019
222	00_img298.jpg	Pepper	895	268	366	156	-12.997	0.926372	0.00147242	Success	0.361998
223	00_img299.jpg	Shampoo	463	593	448	170	-34.7905	0.92313	1.62359	Success	0.355976
224	00_img3.jpg	Xisat	550	502	526	144	-44.2879	0.945887	1.12276	Success	0.337
225	00_img30.jpg	O2	980	573	438	184	-87.0212	0.789401	8.1	Success	0.338998
226	00_img300.jpg	PaperKnife	885	536	532	146	-27.1177	0.843572	2.6552	Success	0.361002
227	00_img301.jpg	FruitKnife	929	535	440	256	88.5926	0.694942	20.1577	Success	0.346997
228	00_img302.jpg	PaperKnife	712	375	532	146	-49.7809	0.920921	1.49927	Success	0.361997
229	00_img303.jpg	O2	764	409	438	184	-67.4321	0.906726	3.47526	Success	0.35497
230	00_img304.jpg	Shampoo	385	537	448	170	-26.1279	0.939636	0.762696	Success	0.387999
231	00_img305.jpg	Shampoo	614	545	448	170	-33.7452	0.945291	1.41552	Success	0.436015
232	00_img306.jpg	Shampoo	891	481	448	170	-47.4548	0.914202	1.17672	Success	0.483
233	00_img307.jpg	O2	689	513	438	184	-18.1448	0.853162	5.17451	Success	0.689999
234	00_img308.jpg	RedMedicine	950	594	324	142	-40.8326	0.96621	1.0779	Success	0.374002
235	00_img309.jpg	HandClean	964	311	392	214	54.2058	0.933972	1.83632	Success	0.478008
236	00_img31.jpg	MilkBottle	0	0	532	238	0	0	50.6402	Fail	0.36508
237	00_img310.jpg	Glue	526	547	488	230	0.770935	0.93437	1.4539	Success	0.362022
238	00_img311.jpg	LaptopClean	417	480	442	174	-2.05695	0.870926	3.1423	Success	0.348036
239	00_img312.jpg	T1	450	451	432	114	-44.7317	0.0746347	6.90226	Fail	0.313063
240	00_img313.jpg	RedMedicine	570	502	324	142	-67.6834	0.93806	1.25269	Success	0.33785
241	00_img314.jpg	FruitKnife	779	420	440	256	-69.3957	0.757285	10.5948	Success	0.317233
242	00_img315.jpg	O2	861	417	438	184	-79.0478	0.876472	2.68776	Success	0.325978
243	00_img316.jpg	PurpleMedicine	388	530	300	146	-84.8534	0.879054	5.08914	Success	0.316654
244	00_img317.jpg	O2	408	440	438	184	-38.1962	0.871048	3.21397	Success	0.356131
245	00_img318.jpg	FruitKnife	778	450	440	256	84.931	0.761385	15.8016	Success	0.323432
246	00_img319.jpg	Xisat	868	379	526	144	-81.6196	0.91313	2.01205	Success	0.334972
247	00_img32.jpg	PaperKnife	1020	382	532	146	-75.0002	0.1903	48.626	Fail	0.319999
248	00_img320.jpg	LaptopClean	649	295	442	174	-82.0858	0.8537	6.61984	Success	0.388072
249	00_img321.jpg	PurpleMedicine	938	538	300	146	-19.4604	0.767966	2.24626	Success	0.361998
250	00_img322.jpg	HandClean	486	467	392	214	-28.1391	0.936569	2.9158	Success	0.394012
251	00_img323.jpg	ABBottle	483	365	474	186	-55.5464	0.843307	3.96865	Success	0.329996
252	00_img324.jpg	T1	487	638	432	114	-45.4452	0.11211	6.35209	Fail	0.330973
253	00_img325.jpg	O2	255	638	438	184	85.2826	0.930415	1.77375	Success	0.341999
254	00_img326.jpg	O2	741	446	438	184	-58.9161	0.913064	2.75019	Success	0.356001
255	00_img327.jpg	LaptopClean	670	630	442	174	-43.4714	0.883836	3.84217	Success	0.364002
256	00_img328.jpg	GreenGlue	0	0	494	106	0	0	36.8671	Fail	0.312294
257	00_img329.jpg	Xisat	724	390	526	144	-66.3645	0.842091	3.20804	Success	0.312974
258	00_img33.jpg	RedMedicine	886	591	324	142	-7.29607	0.750029	10.7489	Success	0.373001
259	00_img330.jpg	SmallMedicine	595	345	260	158	-64.3507	0.792008	1.20931	Success	0.324003
260	00_img331.jpg	Xisat	717	557	526	144	-36.7832	0.951838	1.03772	Success	0.307024
261	00_img332.jpg	LaptopClean	403	304	442	174	-45.2886	0.84373	1.24653	Success	0.340976
262	00_img333.jpg	Block	553	583	278	120	-53.7443	0.19886	8.32749	Fail	0.317
263	00_img334.jpg	Xisat	502	671	526	144	-19.4802	0.929535	1.36755	Success	0.307985
264	00_img335.jpg	LaptopClean	693	456	442	174	-63.1008	0.907049	1.60525	Success	0.318726
265	00_img336.jpg	PaperKnife	453	369	532	146	-31.01	0.927933	1.06622	Success	0.359523
266	00_img337.jpg	Glue	266	616	488	230	-61.6209	0.941914	2.31553	Success	0.356011
267	00_img338.jpg	O2	761	556	438	184	-51.8761	0.953645	1.70483	Success	0.362971
268	00_img339.jpg	T1	685	538	432	114	-42.0857	0.915827	0.548564	Success	0.316028
269	00_img34.jpg	ABBottle	445	539	474	186	-69.6101	0.890533	4.27631	Success	0.326008
270	00_img340.jpg	ABBottle	593	563	474	186	-77.8693	0.727749	0.877578	Success	0.331033
271	00_img341.jpg	ABBottle	450	388	474	186	-42.133	0.740405	0.422592	Success	0.324032
272	00_img342.jpg	RedMedicine	983	478	324	142	-39.0961	0.890911	1.40726	Success	0.310029
273	00_img343.jpg	Yogurt	520	610	478	196	-35.5848	0.949737	1.91136	Success	0.350996
274	00_img344.jpg	LaptopClean	905	253	442	174	-23.002	0.87301	4.5576	Success	0.316974
275	00_img345.jpg	HandClean	510	459	392	214	52.7376	0.946945	1.08252	Success	0.390501
276	00_img346.jpg	Shampoo	731	618	448	170	-47.4598	0.970048	0.745363	Success	0.318976
277	00_img347.jpg	CokeBottle	0	0	576	202	0	0	71.7826	Fail	0.321973
278	00_img348.jpg	SoftWash	483	457	390	264	-22.5049	0.811466	4.23397	Success	0.30602
279	00_img349.jpg	PaperKnife	483	471	532	146	-41.4978	0.848458	4.65851	Success	0.326973
280	00_img35.jpg	ABBottle	456	378	474	186	-41.8183	0.747325	1.53602	Success	0.324975
281	00_img350.jpg	Glue	623	728	488	230	-77.195	0.859206	0.035487	Success	0.349999
282	00_img351.jpg	FruitKnife	666	479	440	256	-56.9432	0.948783	0.63391	Success	0.336195
283	00_img352.jpg	RedMedicine	771	564	324	142	-58.8411	0.919349	3.12144	Success	0.338004
284	00_img353.jpg	GreenGlue	171	613	494	106	-74.2424	0	45.7836	Fail	0.301022
285	00_img354.jpg	SmallMedicine	750	559	260	158	-60.3632	0.96282	0.505929	Success	0.325998
286	00_img355.jpg	SoftWash	483	621	390	264	-16.3897	0.906617	4.6099	Success	0.301005
287	00_img356.jpg	O2	463	513	438	184	-88.0304	0.85321	6.91161	Success	0.330997
288	00_img357.jpg	LaptopClean	865	338	442	174	-61.7597	0.794179	7.41537	Success	0.305999
289	00_img358.jpg	ABBottle	539	545	474	186	-53.9506	0.917973	1.67011	Success	0.337979
290	00_img359.jpg	T1	723	549	432	114	-69.0478	0.474363	15.4616	Success	0.316962
291	00_img36.jpg	SmallMedicine	327	632	260	158	68.4776	0.729257	18.8864	Success	0.313987
292	00_img360.jpg	T1	940	455	432	114	63.1543	0.148946	51.4137	Fail	0.301991
293	00_img361.jpg	Yogurt	643	469	478	196	2.82556	0.865083	3.73365	Success	0.35002
294	00_img362.jpg	RedMedicine	952	369	324	142	-58.2938	0.881858	0.645998	Success	0.349695
295	00_img363.jpg	LaptopClean	393	420	442	174	-34.198	0.949773	0.760931	Success	0.372001
296	00_img364.jpg	Pepper	505	431	366	156	-66.1405	0.820671	3.24532	Success	0.351008
297	00_img365.jpg	Xisat	705	386	526	144	-61.2898	0.753622	2.71075	Success	0.331
298	00_img366.jpg	HandClean	447	478	392	214	-23.5813	0.906721	3.97191	Success	0.380012
299	00_img367.jpg	HandClean	543	513	392	214	-24.9947	0.927983	3.55176	Success	0.416001
300	00_img368.jpg	Shampoo	390	442	448	170	84.2265	0.893731	0.371488	Success	0.3139
301	00_img369.jpg	LaptopClean	716	628	442	174	-49.666	0.91511	2.35385	Success	0.355034
302	00_img37.jpg	ABBottle	698	538	474	186	-46.0739	0.873786	4.51952	Success	0.335606
303	00_img370.jpg	Pepper	532	451	366	156	-11.5843	0.849497	2.57896	Success	0.347041
304	00_img371.jpg	Glue	532	486	488	230	1.23841	0.960313	1.46874	Success	0.371001
305	00_img372.jpg	Shampoo	789	522	448	170	-15.3831	0.963034	0.767969	Success	0.328997
306	00_img373.jpg	ABBottle	399	552	474	186	-22.5215	0.693114	0.157685	Success	0.349
307	00_img374.jpg	Xisat	746	397	526	144	-55.6062	0.965866	0.976561	Success	0.329511
308	00_img375.jpg	T1	1008	466	432	114	16.6773	0.154142	81.0922	Fail	0.336011
309	00_img376.jpg	Xisat	454	569	526	144	-26.3783	0.890856	1.02009	Success	0.318974
310	00_img377.jpg	ABBottle	417	542	474	186	-39.0966	0.858484	0.860841	Success	0.345129
311	00_img378.jpg	PaperKnife	1035	380	532	146	3.96483	0.216993	27.5658	Fail	0.327015
312	00_img379.jpg	GreenSoap	696	424	396	274	-60.8314	0.882249	1.11352	Success	0.413025
313	00_img38.jpg	GreenSoap	895	641	396	274	28.7102	0.936192	2.70795	Success	0.313032
314	00_img380.jpg	O2	432	452	438	184	-45.3338	0.949734	1.18206	Success	0.310005
315	00_img381.jpg	FruitKnife	764	434	440	256	-79.3889	0.87013	1.11903	Success	0.326379
316	00_img382.jpg	MilkBottle	0	0	532	238	0	0	27.3524	Fail	0.331999
317	00_img383.jpg	HandClean	461	531	392	214	55.0604	0.936095	3.17186	Success	0.40633
318	00_img384.jpg	Shampoo	333	600	448	170	-11.902	0.925294	0.921409	Success	0.335996
319	00_img385.jpg	LaptopClean	856	465	442	174	-30.6278	0.887609	2.00784	Success	0.37404
320	00_img386.jpg	RedMedicine	485	634	324	142	-32.6786	0.925344	3.03398	Success	0.314996
321	00_img387.jpg	LaptopClean	601	628	442	174	-11.978	0.960424	0.710219	Success	0.32035
322	00_img388.jpg	T1	698	512	432	114	-87.6724	0.58942	15.2329	Success	0.308901
323	00_img389.jpg	O2	586	562	438	184	-37.2117	0.917424	2.74392	Success	0.346487
324	00_img39.jpg	CokeBottle	0	0	576	202	0	0	80.3989	Fail	0.3195
325	00_img390.jpg	GreenGlue	0	0	494	106	0	0	40.1901	Fail	0.322
326	00_img391.jpg	CokeBottle	0	0	576	202	0	0	17.9352	Fail	0.322
327	00_img392.jpg	RedMedicine	315	539	324	142	-55.298	0.93419	1.27896	Success	0.330001
328	00_img393.jpg	RedMedicine	400	557	324	142	-43.0621	0.854269	1.00587	Success	0.316032
329	00_img394.jpg	RedMedicine	389	457	324	142	-19.5828	0.841224	3.60724	Success	0.312898
330	00_img395.jpg	T1	465	594	432	114	-11.8544	0.864729	2.28472	Success	0.298057
331	00_img396.jpg	Xisat	872	345	526	144	-53.6665	0.885308	1.02185	Success	0.366018
332	00_img397.jpg	PaperKnife	751	507	532	146	-27.0825	0.910968	0.580133	Success	0.317829
333	00_img398.jpg	HandClean	775	310	392	214	-25.9169	0.934817	2.72319	Success	0.402997
334	00_img399.jpg	Pepper	786	330	366	156	0.349497	0.879886	3.18753	Success	0.359973
335	00_img4.jpg	ABBottle	538	507	474	186	-42.195	0.828166	4.24348	Success	0.354114
336	00_img40.jpg	LaptopClean	471	519	442	174	-76.0397	0.91272	0.697526	Success	0.318998
337	00_img400.jpg	HandClean	646	606	392	214	-28.5686	0.948682	2.22384	Success	0.39903
338	00_img401.jpg	SmallMedicine	313	590	260	158	-59.1381	0.925861	3.36663	Success	0.310974
339	00_img402.jpg	RedMedicine	635	548	324	142	-14.1817	0.907041	1.34995	Success	0.321973
340	00_img403.jpg	RedMedicine	282	603	324	142	83.2863	0.93925	1.33035	Success	0.304001
341	00_img404.jpg	ABBottle	670	450	474	186	-1.68674	0.88528	0.603031	Success	0.334996
342	00_img405.jpg	Xisat	741	457	526	144	-17.7301	0.948461	0.286561	Success	0.325999
343	00_img406.jpg	HandClean	309	573	392	214	-29.6121	0.9486	0.500635	Success	0.390976
344	00_img407.jpg	Pepper	313	416	366	156	-19.237	0.695648	4.53374	Success	0.351
345	00_img408.jpg	LaptopClean	674	515	442	174	-81.4891	0.889063	2.40023	Success	0.316003
346	00_img409.jpg	ABBottle	568	566	474	186	-43.1188	0.912155	0.667745	Success	0.316025
347	00_img41.jpg	Glue	575	415	488	230	80.3005	0.927091	2.23991	Success	0.338001
348	00_img410.jpg	O2	787	351	438	184	-72.6779	0.940526	1.09671	Success	0.339004
349	00_img411.jpg	RedMedicine	499	266	324	142	-2.75048	0.75425	0.0784994	Success	0.352977
350	00_img412.jpg	RedMedicine	627	563	324	142	-64.1296	0.885512	1.87948	Success	0.352025
351	00_img413.jpg	Xisat	493	422	526	144	-54.9772	0.838695	2.76266	Success	0.331974
352	00_img414.jpg	LaptopClean	622	436	442	174	4.35042	0.774461	8.60125	Success	0.341015
353	00_img415.jpg	Yogurt	627	461	478	196	-58.0412	0.836607	1.44639	Success	0.327998
354	00_img416.jpg	PurpleMedicine	920	345	300	146	-19.0648	0.625654	1.09599	Success	0.333991
355	00_img417.jpg	LaptopClean	467	533	442	174	-58.6585	0.914828	2.75379	Success	0.339001
356	00_img418.jpg	MilkBottle	593	672	532	238	-56.782	0.395716	8.34508	Success	0.330999
357	00_img419.jpg	Pepper	523	450	366	156	-19.0094	0.936165	2.32774	Success	0.332031
358	00_img42.jpg	LaptopClean	478	506	442	174	-20.0902	0.924821	2.53777	Success	0.325974
359	00_img420.jpg	Shampoo	709	485	448	170	-61.2646	0.906978	3.06388	Success	0.344018
360	00_img421.jpg	PaperKnife	748	413	532	146	-48.5828	0.706701	7.07309	Success	0.324997
361	00_img422.jpg	PurpleMedicine	799	291	300	146	-15.637	0.860126	1.96302	Success	0.324975
362	00_img423.jpg	FruitKnife	872	523	440	256	87.6386	0.790082	11.9216	Success	0.312998
363	00_img424.jpg	O2	679	487	438	184	-44.02	0.982461	0.168795	Success	0.323998
364	00_img425.jpg	CokeBottle	455	210	576	202	-39.1003	0.000625358	17.1094	Fail	0.312995
365	00_img426.jpg	Block	824	773	278	120	49.542	0.523771	34.8624	Fail	0.297
366	00_img427.jpg	Yogurt	649	365	478	196	-34.992	0.765968	1.80679	Success	0.342
367	00_img428.jpg	FruitKnife	422	453	440	256	60.7187	0.695932	15.4804	Success	0.323996
368	00_img429.jpg	T1	808	754	432	114	-38.7086	0	17.9397	Fail	0.298963
369	00_img43.jpg	Xisat	932	441	526	144	-1.83446	0.924315	1.90124	Success	0.324981
370	00_img430.jpg	PaperKnife	372	605	532	146	-43.1231	0.853135	4.56776	Success	0.312975
371	00_img431.jpg	FruitKnife	677	494	440	256	-45.2675	0.845739	0.789851	Success	0.307
372	00_img432.jpg	RedMedicine	526	466	324	142	77.3537	0.835438	4.09353	Success	0.334961
373	00_img433.jpg	Yogurt	446	431	478	196	-32.3794	0.897033	3.02212	Success	0.342976
374	00_img434.jpg	T1	581	529	432	114	-53.8472	0.627563	3.3642	Success	0.347999
375	00_img435.jpg	O2	501	611	438	184	-59.7458	0.904528	1.9265	Success	0.333997
376	00_img436.jpg	Shampoo	692	478	448	170	-11.7421	0.941428	1.00744	Success	0.33799
377	00_img437.jpg	Yogurt	556	536	478	196	-3.88528	0.952541	1.86486	Success	0.321977
378	00_img438.jpg	RedMedicine	364	568	324	142	-42.0728	0.854049	0.294218	Success	0.316996
379	00_img439.jpg	Shampoo	712	452	448	170	-36.3992	0.940254	1.91207	Success	0.333016
380	00_img44.jpg	HandClean	872	349	392	214	-29.9927	0.90965	0.740567	Success	0.380029
381	00_img440.jpg	GreenGlue	0	0	494	106	0	0	43.5782	Fail	0.304031
382	00_img441.jpg	T1	-377	98	432	114	-43.7952	0	5.89505	Fail	0.330973
383	00_img442.jpg	ABBottle	538	366	474	186	-51.4125	0.903185	0.597584	Success	0.317006
384	00_img443.jpg	Xisat	878	389	526	144	-44.9699	0.910129	2.09692	Success	0.299717
385	00_img444.jpg	HandClean	506	382	392	214	-27.8224	0.903017	1.08132	Success	0.404028
386	00_img445.jpg	GreenSoap	353	536	396	274	-12.3956	0.845419	0.711258	Success	0.309976
387	00_img446.jpg	MilkBottle	0	0	532	238	0	0	32.3419	Fail	0.327976
388	00_img447.jpg	Shampoo	588	514	448	170	-0.5869	0.960841	1.40539	Success	0.318008
389	00_img448.jpg	Xisat	632	516	526	144	-0.27264	0.91334	0.473213	Success	0.331971
390	00_img449.jpg	Glue	814	383	488	230	-70.0167	0.94964	2.24865	Success	0.349856
391	00_img45.jpg	T1	350	651	432	114	-70.981	0.321215	32.7416	Fail	0.325024
392	00_img450.jpg	Pepper	671	477	366	156	2.12528	0.883849	3.04293	Success	0.349007
393	00_img451.jpg	Yogurt	415	521	478	196	-62.898	0.78699	3.15102	Success	0.323003
394	00_img452.jpg	Xisat	513	483	526	144	-41.7958	0.905124	0.161746	Success	0.293971
395	00_img453.jpg	Glue	332	541	488	230	-31.5554	0.924347	0.974823	Success	0.333
396	00_img454.jpg	Block	5319	3462	278	120	86.0786	0	45.8374	Fail	0.291971
397	00_img455.jpg	HandClean	696	337	392	214	-28.8694	0.891049	0.581937	Success	0.378047
398	00_img456.jpg	RedMedicine	554	485	324	142	-41.2595	0.910919	1.47923	Success	0.320968
399	00_img457.jpg	RedMedicine	847	418	324	142	-60.2125	0.944532	1.55807	Success	0.305972
400	00_img458.jpg	GreenSoap	583	554	396	274	-33.9632	0.94612	1.09872	Success	0.311372
401	00_img459.jpg	HandClean	464	570	392	214	-21.6519	0.872777	6.54048	Success	0.369025
402	00_img46.jpg	T1	662	321	432	114	-21.2491	0.64468	3.08993	Success	0.324976
403	00_img460.jpg	CokeBottle	0	0	576	202	0	0	38.0654	Fail	0.321207
404	00_img461.jpg	FruitKnife	796	356	440	256	-76.6459	0.911426	0.447351	Success	0.314
405	00_img462.jpg	LaptopClean	382	412	442	174	-46.6262	0.955337	0.404378	Success	0.332
406	00_img463.jpg	GreenSoap	579	519	396	274	-33.7442	0.981146	0.909349	Success	0.310972
407	00_img464.jpg	SoftWash	322	531	390	264	75.9552	0.888008	5.96093	Success	0.338
408	00_img465.jpg	PaperKnife	757	520	532	146	83.2573	0.967997	0.522762	Success	0.323066
409	00_img466.jpg	Yogurt	644	582	478	196	-30.4637	0.852826	0.382294	Success	0.325031
410	00_img467.jpg	Glue	287	336	488	230	-45.7229	0.860203	1.46675	Success	0.343977
411	00_img468.jpg	T1	897	433	432	114	-50.0876	0.774035	4.71079	Success	0.322999
412	00_img469.jpg	Shampoo	366	545	448	170	-55.8354	0.939185	1.91821	Success	0.317002
413	00_img47.jpg	Glue	531	463	488	230	-7.897	0.927428	1.54025	Success	0.321997
414	00_img470.jpg	T1	789	263	432	114	-26.065	0.056626	10.0226	Fail	0.337002
415	00_img471.jpg	O2	599	413	438	184	-37.6485	0.938023	0.254832	Success	0.343001
416	00_img472.jpg	ABBottle	503	554	474	186	-40.7794	0.823764	4.83166	Success	0.347998
417	00_img473.jpg	T1	-148	-425	432	114	48.4874	0	75.6229	Fail	0.319996
418	00_img474.jpg	Block	839	503	278	120	-50.6851	0.883034	0.409253	Success	0.29001
419	00_img475.jpg	ABBottle	722	444	474	186	-72.1672	0.77081	3.45136	Success	0.318993
420	00_img476.jpg	Glue	537	349	488	230	-66.1177	0.913347	2.41156	Success	0.33899
421	00_img477.jpg	DrillCover	616	508	454	148	1.17948	0.90439	2.9517	Success	0.321021
422	00_img478.jpg	O2	674	548	438	184	-34.7183	0.894936	4.25596	Success	0.332972
423	00_img479.jpg	Xisat	892	312	526	144	-48.2371	0.896655	0.863237	Success	0.301023
424	00_img48.jpg	O2	576	549	438	184	-0.983954	0.889497	3.52855	Success	0.327978
425	00_img480.jpg	PurpleMedicine	998	622	300	146	0.684205	0.942995	2.4912	Success	0.318975
426	00_img481.jpg	MilkBottle	0	0	532	238	0	0	31.5711	Fail	0.321998
427	00_img482.jpg	Pepper	683	491	366	156	-56.7405	0.984674	0.0512182	Success	0.333002
428	00_img483.jpg	RedMedicine	345	499	324	142	-24.8572	0.877505	5.10723	Success	0.299973
429	00_img484.jpg	Glue	940	389	488	230	-76.4074	0.954497	1.76644	Success	0.326004
430	00_img485.jpg	DrillCover	512	302	454	148	-30.5451	0.125968	70.7786	Fail	0.310995
431	00_img486.jpg	LaptopClean	787	457	442	174	-33.2934	0.965806	0.698783	Success	0.324014
432	00_img487.jpg	SoftWash	782	449	390	264	57.6314	0.988966	0.285415	Success	0.302486
433	00_img488.jpg	PurpleMedicine	632	430	300	146	-76.3716	0.948762	1.72809	Success	0.308511
434	00_img489.jpg	ABBottle	474	471	474	186	-50.6068	0.843167	2.21868	Success	0.330037
435	00_img49.jpg	Shampoo	595	595	448	170	-14.1099	0.950429	1.03809	Success	0.337997
436	00_img490.jpg	O2	939	621	438	184	-40.1437	0.917869	0.86309	Success	0.340014
437	00_img491.jpg	T1	544	693	432	114	43.0904	0.189597	55.8799	Fail	0.292999
438	00_img492.jpg	PurpleMedicine	498	377	300	146	-68.2862	0.859303	3.75838	Success	0.301519
439	00_img493.jpg	FruitKnife	658	5252	440	256	32.9906	0	74.925	Fail	0.323163
440	00_img494.jpg	Xisat	724	400	526	144	-61.0948	0.920411	0.902382	Success	0.312011
441	00_img495.jpg	SmallMedicine	609	407	260	158	-62.1853	0.807934	2.42505	Success	0.309999
442	00_img496.jpg	Pepper	375	620	366	156	-16.1924	0.820617	0.00451607	Success	0.32483
443	00_img497.jpg	Pepper	308	418	366	156	-56.089	0.807451	0.578012	Success	0.305999
444	00_img498.jpg	Xisat	710	578	526	144	-29.1163	0.921705	1.3342	Success	0.394
445	00_img499.jpg	LaptopClean	747	321	442	174	-62.3208	0.924293	0.501973	Success	0.622517
446	00_img5.jpg	T1	393	677	432	114	-2.28729	0.674745	10.4901	Success	0.362015
447	00_img50.jpg	Glue	654	384	488	230	-55.1704	0.943871	1.78422	Success	0.358035
448	00_img500.jpg	DrillCover	554	145	454	148	-13.8559	0.0566026	82.8985	Fail	0.37817
449	00_img501.jpg	Xisat	349	589	526	144	-48.6094	0.922924	1.15879	Success	0.332893
450	00_img502.jpg	GreenGlue	0	0	494	106	0	0	37.9649	Fail	0.301068
451	00_img503.jpg	Yogurt	521	612	478	196	-39.502	0.942751	0.640062	Success	0.353969
452	00_img504.jpg	Shampoo	430	475	448	170	-18.3683	0.968648	0.970882	Success	0.359159
453	00_img505.jpg	RedMedicine	971	393	324	142	-31.6189	0.845148	0.455155	Success	0.360656
454	00_img506.jpg	Glue	198	654	488	230	71.4187	0.935044	0.0518751	Success	0.389575
455	00_img507.jpg	CokeBottle	0	0	576	202	0	0	30.9579	Fail	0.345802
456	00_img508.jpg	GreenGlue	0	0	494	106	0	0	46.1438	Fail	0.319638
457	00_img509.jpg	SoftWash	426	407	390	264	-21.972	0.932527	3.31301	Success	0.312112
458	00_img51.jpg	GreenSoap	501	442	396	274	-58.8434	0.967621	1.13929	Success	0.339067
459	00_img510.jpg	LaptopClean	565	434	442	174	-38.9135	0.864444	2.17811	Success	0.340045
460	00_img511.jpg	SmallMedicine	471	515	260	158	-71.7784	0.8832	6.66928	Success	0.334002
461	00_img512.jpg	CokeBottle	0	0	576	202	0	0	81.2004	Fail	0.322102
462	00_img513.jpg	T1	698	492	432	114	-58.2529	0.721022	4.54982	Success	0.377058
463	00_img514.jpg	FruitKnife	643	464	440	256	-78.4277	0.860792	7.67856	Success	0.326566
464	00_img515.jpg	O2	609	469	438	184	-43.5142	0.925988	3.19324	Success	0.325153
465	00_img516.jpg	PurpleMedicine	815	207	300	146	2.01932	0.817621	5.77019	Success	0.305267
466	00_img517.jpg	PurpleMedicine	723	269	300	146	-37.3073	0.859231	4.71972	Success	0.312046
467	00_img518.jpg	HandClean	269	638	392	214	58.145	0.911497	4.76378	Success	0.372005
468	00_img519.jpg	Shampoo	570	473	448	170	-59.9005	0.960679	0.725782	Success	0.322033
469	00_img52.jpg	O2	548	544	438	184	-24.4274	0.854719	6.53663	Success	0.377578
470	00_img520.jpg	LaptopClean	570	445	442	174	-61.0528	0.879121	1.24573	Success	0.352558
471	00_img521.jpg	FruitKnife	531	373	440	256	-46.2312	0.805749	1.83405	Success	0.318999
472	00_img522.jpg	O2	367	559	438	184	-20.517	0.921653	3.38663	Success	0.349017
473	00_img523.jpg	FruitKnife	695	445	440	256	-60.9174	0.846961	4.08567	Success	0.321998
474	00_img524.jpg	O2	925	355	438	184	-31.7903	0.905602	3.5594	Success	0.320009
475	00_img525.jpg	RedMedicine	426	526	324	142	-55.211	0.917993	1.78806	Success	0.339981
476	00_img526.jpg	RedMedicine	739	455	324	142	-48.4931	0.873524	0.347762	Success	0.345998
477	00_img527.jpg	RedMedicine	385	563	324	142	-43.5956	0.913281	1.93888	Success	0.327038
478	00_img528.jpg	Xisat	329	554	526	144	-27.2745	0.914117	0.104982	Success	0.305014
479	00_img529.jpg	Yogurt	410	358	478	196	-52.9477	0.95976	1.06462	Success	0.321039
480	00_img53.jpg	Xisat	830	575	526	144	-11.3565	0.860289	4.27409	Success	0.310033
481	00_img530.jpg	Xisat	733	546	526	144	-38.5717	0.975698	0.405177	Success	0.322977
482	00_img531.jpg	O2	440	616	438	184	16.4008	0.888089	4.20899	Success	0.405993
483	00_img532.jpg	CokeBottle	0	0	576	202	0	0	76.5311	Fail	0.362
484	00_img533.jpg	O2	556	544	438	184	-38.7351	0.876564	3.42605	Success	0.356016
485	00_img534.jpg	CokeBottle	822	503	576	202	18.3613	0.607212	11.7984	Success	0.376998
486	00_img535.jpg	Yogurt	432	541	478	196	-25.5659	0.957186	0.880302	Success	0.469001
487	00_img536.jpg	Shampoo	695	621	448	170	-13.0754	0.918068	2.83889	Success	0.757569
488	00_img537.jpg	Yogurt	489	571	478	196	-31.362	0.840236	3.71541	Success	0.377372
489	00_img538.jpg	Xisat	537	440	526	144	-17.4455	0.893263	2.54168	Success	0.33594
490	00_img539.jpg	LaptopClean	593	315	442	174	-7.89115	0.890757	0.338754	Success	0.382032
491	00_img54.jpg	Pepper	375	684	366	156	-69.1266	0.922141	3.15029	Success	0.448505
492	00_img540.jpg	HandClean	892	490	392	214	-37.9892	0.891216	5.8694	Success	0.502673
493	00_img541.jpg	PaperKnife	1113	620	532	146	41.7198	0.313061	16.4645	Success	0.376397
494	00_img542.jpg	O2	719	473	438	184	-54.6581	0.960314	1.69156	Success	0.326754
495	00_img543.jpg	PurpleMedicine	346	673	300	146	80.8628	0.883147	0.344868	Success	0.336922
496	00_img544.jpg	RedMedicine	623	379	324	142	-73.5709	0.858655	0.559306	Success	0.333707
497	00_img545.jpg	GreenGlue	0	0	494	106	0	0	59.563	Fail	0.30144
498	00_img546.jpg	Shampoo	617	541	448	170	-47.2609	0.929273	1.45165	Success	0.330998
499	00_img547.jpg	GreenGlue	0	0	494	106	0	0	53.6821	Fail	0.311092
500	00_img548.jpg	Pepper	613	671	366	156	-22.7838	0.958585	0.562727	Success	0.353972
501	00_img549.jpg	Block	351	637	278	120	-62.2531	0.586574	0.557288	Success	0.338663
502	00_img55.jpg	HandClean	600	427	392	214	53.2241	0.923409	1.08001	Success	0.455393
503	00_img550.jpg	FruitKnife	688	478	440	256	62.9363	0.767003	14.5169	Success	0.338236
504	00_img551.jpg	Xisat	440	436	526	144	-44.9213	0.94936	0.834199	Success	0.311587
505	00_img552.jpg	LaptopClean	552	504	442	174	-26.9539	0.852575	3.72392	Success	0.420873
506	00_img553.jpg	FruitKnife	614	565	440	256	75.6263	0.85181	3.05864	Success	0.317995
507	00_img554.jpg	T1	577	497	432	114	-40.6293	0.332928	5.15771	Success	0.350977
508	00_img555.jpg	Pepper	536	422	366	156	84.9193	0.857701	2.71439	Success	0.34066
509	00_img556.jpg	FruitKnife	606	502	440	256	-58.3096	0.883075	1.64238	Success	0.34196
510	00_img557.jpg	Xisat	344	467	526	144	-41.6978	0.952358	0.966174	Success	0.326998
511	00_img558.jpg	HandClean	420	442	392	214	-30.4572	0.970082	1.21381	Success	0.442085
512	00_img559.jpg	Yogurt	878	663	478	196	-36.1251	0.911013	1.93266	Success	0.347996
513	00_img56.jpg	T1	522	525	432	114	-16.6001	0.651103	11.8901	Success	0.348494
514	00_img560.jpg	ABBottle	691	461	474	186	-56.0012	0.791826	8.19223	Success	0.362777
515	00_img561.jpg	FruitKnife	575	545	440	256	47.6409	0.473071	30.225	Fail	0.302024
516	00_img562.jpg	LaptopClean	538	504	442	174	-12.9415	0.84044	4.9289	Success	0.374619
517	00_img563.jpg	O2	631	290	438	184	-81.4661	0.771307	7.56465	Success	0.348
518	00_img564.jpg	GreenGlue	0	0	494	106	0	0	35.1367	Fail	0.322973
519	00_img565.jpg	Glue	341	306	488	230	80.5151	0.899572	1.31086	Success	0.385972
520	00_img566.jpg	T1	-2124	-2595	432	114	-12.2879	0	60.9003	Fail	0.348002
521	00_img567.jpg	Glue	321	566	488	230	-24.5171	0.895262	1.73991	Success	0.376057
522	00_img568.jpg	Shampoo	400	538	448	170	-56.6671	0.910266	1.34514	Success	0.327114
523	00_img569.jpg	T1	460	529	432	114	-68.3369	0.855927	3.86379	Success	0.368753
524	00_img57.jpg	LaptopClean	397	594	442	174	-21.1492	0.935372	1.41965	Success	0.387875
525	00_img570.jpg	Xisat	409	578	526	144	-43.5265	0.9109	0.857239	Success	0.318316
526	00_img571.jpg	ABBottle	549	619	474	186	-44.8686	0.809957	4.7447	Success	0.355824
527	00_img572.jpg	CokeBottle	0	0	576	202	0	0	67.9753	Fail	0.340244
528	00_img573.jpg	O2	500	542	438	184	-64.4653	0.937633	2.23275	Success	0.353497
529	00_img574.jpg	GreenGlue	690	557	494	106	-37.0567	0.134669	54.8742	Fail	0.330998
530	00_img575.jpg	PaperKnife	569	435	532	146	-70.7632	0.785519	3.81031	Success	0.366789
531	00_img576.jpg	PaperKnife	807	559	532	146	-51.2637	0.880435	3.58411	Success	0.353425
532	00_img577.jpg	LaptopClean	565	574	442	174	-22.435	0.897058	4.3107	Success	0.358591
533	00_img578.jpg	FruitKnife	694	387	440	256	62.8273	0.750243	17.4978	Success	0.322999
534	00_img579.jpg	Shampoo	807	446	448	170	-85.0784	0.9154	3.47366	Success	0.355986
535	00_img58.jpg	ABBottle	635	455	474	186	-52.4841	0.885331	3.35297	Success	0.340024
536	00_img580.jpg	O2	585	389	438	184	-37.2154	0.899711	3.51043	Success	0.326334
537	00_img581.jpg	Block	0	0	278	120	0	0	63.1403	Fail	0.317314
538	00_img582.jpg	Glue	856	613	488	230	-47.4369	0.959556	1.17723	Success	0.399514
539	00_img583.jpg	Pepper	901	592	366	156	-14.1303	0.869647	0.804231	Success	0.395375
540	00_img584.jpg	PurpleMedicine	551	463	300	146	-52.7209	0.970104	1.18912	Success	0.316934
541	00_img585.jpg	Shampoo	383	564	448	170	-11.3634	0.922058	2.80179	Success	0.323059
542	00_img586.jpg	O2	619	578	438	184	-46.455	0.90203	3.42087	Success	0.357585
543	00_img587.jpg	DrillCover	626	538	454	148	-2.99172	0.956367	1.1259	Success	0.367007
544	00_img588.jpg	Yogurt	475	538	478	196	-42.7719	0.938667	2.45598	Success	0.337285
545	00_img589.jpg	GreenSoap	580	577	396	274	54.4349	0.91519	2.50695	Success	0.341021
546	00_img59.jpg	Xisat	782	444	526	144	-29.2734	0.942308	0.874427	Success	0.413162
547	00_img590.jpg	Xisat	402	625	526	144	-50.5557	0.835761	0.572519	Success	0.31811
548	00_img591.jpg	Xisat	335	420	526	144	-61.439	0.907348	0.0976452	Success	0.333085
549	00_img592.jpg	PurpleMedicine	832	544	300	146	-47.5364	0.94758	0.437851	Success	0.332533
550	00_img593.jpg	Shampoo	653	463	448	170	-52.1445	0.967726	1.03946	Success	0.37324
551	00_img594.jpg	Yogurt	772	576	478	196	-64.08	0.930194	2.61433	Success	0.403143
552	00_img595.jpg	GreenGlue	0	0	494	106	0	0	70.9729	Fail	0.319026
553	00_img596.jpg	PurpleMedicine	858	416	300	146	79.8493	0.931843	2.48367	Success	0.431084
554	00_img597.jpg	T1	518	562	432	114	-39.4249	0.268941	9.35477	Success	0.333
555	00_img598.jpg	GreenSoap	373	520	396	274	-30.6094	0.895593	0.613035	Success	0.34702
556	00_img599.jpg	RedMedicine	687	480	324	142	-41.1378	0.952825	1.01478	Success	0.351543
557	00_img6.jpg	Pepper	537	324	366	156	-25.9767	0.950286	0.150821	Success	0.402582
558	00_img60.jpg	RedMedicine	850	565	324	142	80.4929	0.832193	0.803926	Success	0.336374
559	00_img61.jpg	GreenGlue	0	0	494	106	0	0	37.9746	Fail	0.308774
560	00_img62.jpg	SoftWash	541	457	390	264	-31.6583	0.918241	4.84693	Success	0.42895
561	00_img63.jpg	GreenSoap	447	528	396	274	58.3944	0.880706	0.82497	Success	0.331098
562	00_img64.jpg	RedMedicine	472	459	324	142	-44.3454	0.953524	1.28495	Success	0.346037
563	00_img65.jpg	CokeBottle	0	0	576	202	0	0	81.6281	Fail	0.310021
564	00_img66.jpg	O2	567	419	438	184	-66.5744	0.957085	0.788377	Success	0.389511
565	00_img67.jpg	Xisat	602	685	526	144	-12.4282	0.930654	1.32889	Success	0.314243
566	00_img68.jpg	O2	616	367	438	184	86.6933	0.888538	3.90331	Success	0.356035
567	00_img69.jpg	O2	766	456	438	184	-72.7102	0.91437	2.12845	Success	0.346566
568	00_img7.jpg	Pepper	852	396	366	156	-25.3651	0.89896	3.08571	Success	0.380037
569	00_img70.jpg	PaperKnife	620	568	532	146	-42.0818	0.600812	2.35614	Success	0.351001
570	00_img71.jpg	ABBottle	767	589	474	186	-75.0231	0.832709	5.29557	Success	0.370511
571	00_img72.jpg	PaperKnife	433	538	532	146	-43.2849	0.80597	3.06191	Success	0.386531
572	00_img73.jpg	Pepper	457	498	366	156	-49.21	0.850964	0.272561	Success	0.350102
573	00_img74.jpg	Glue	840	365	488	230	-28.8013	0.964977	1.15053	Success	0.353525
574	00_img75.jpg	Xisat	749	656	526	144	-0.0695636	0.913487	0.976314	Success	0.339263
575	00_img76.jpg	O2	364	511	438	184	82.0336	0.829843	1.56639	Success	0.341001
576	00_img77.jpg	RedMedicine	506	401	324	142	-51.0801	0.741851	1.52167	Success	0.323182
577	00_img78.jpg	T1	425	453	432	114	-3.4714	0.555184	16.4388	Success	0.340166
578	00_img79.jpg	LaptopClean	204	525	442	174	-53.8443	0.858592	2.41422	Success	0.342496
579	00_img8.jpg	LaptopClean	799	385	442	174	-65.433	0.923952	2.88634	Success	0.343509
580	00_img80.jpg	PurpleMedicine	477	638	300	146	-71.6653	0.91622	2.38035	Success	0.342973
581	00_img81.jpg	Yogurt	584	504	478	196	-30.0928	0.833483	3.22908	Success	0.348265
582	00_img82.jpg	O2	763	583	438	184	-33.5076	0.839845	1.1373	Success	0.355996
583	00_img83.jpg	RedMedicine	389	580	324	142	-67.1962	0.845589	0.289314	Success	0.323546
584	00_img84.jpg	LaptopClean	487	495	442	174	-18.233	0.88321	1.56835	Success	0.417561
585	00_img85.jpg	SoftWash	273	610	390	264	67.496	0.943735	3.13959	Success	0.330999
586	00_img86.jpg	T1	508	752	432	114	69.6756	0.15615	77.6692	Fail	0.324859
587	00_img87.jpg	PurpleMedicine	543	388	300	146	-67.2133	0.909353	0.693541	Success	0.318997
588	00_img88.jpg	CokeBottle	0	0	576	202	0	0	65.1413	Fail	0.317993
589	00_img89.jpg	GreenGlue	0	0	494	106	0	0	51.5264	Fail	0.352921
590	00_img9.jpg	O2	630	409	438	184	-60.7925	0.916287	1.99046	Success	0.341977
591	00_img90.jpg	CokeBottle	0	0	576	202	0	0	79.8446	Fail	0.395029
592	00_img91.jpg	T1	463	529	432	114	-60.548	0.435026	2.90874	Success	0.355267
593	00_img92.jpg	ABBottle	447	573	474	186	-37.0712	0.880962	0.363013	Success	0.332577
594	00_img93.jpg	MilkBottle	0	0	532	238	0	0	49.4327	Fail	0.345225
595	00_img94.jpg	T1	599	298	432	114	-22.1035	0.835735	3.67103	Success	0.376737
596	00_img95.jpg	T1	637	296	432	114	-49.0273	0.0869912	16.3833	Fail	0.440521
597	00_img96.jpg	Xisat	427	574	526	144	-30.9251	0.820699	4.0173	Success	0.358995
598	00_img97.jpg	Yogurt	532	507	478	196	-18.5662	0.932178	0.682826	Success	0.508362
599	00_img98.jpg	T1	549	531	432	114	-11.543	0.211228	18.7253	Fail	0.369051
600	00_img99.jpg	ABBottle	595	487	474	186	-37.7542	0.819411	1.09151	Success	0.387268
601	Img-01-08-2021 23-57-53.jpg	GreenGlue	1174	677	494	106	-47.2257	0	29.2203	Fail	0.301789
602	Img-01-08-2021 23-57-53.jpg	FruitKnife	257	574	440	256	47.3889	0.503076	51.73	Fail	0.30998
603	Img-01-08-2021 23-57-57.jpg	GreenGlue	0	0	494	106	0	0	59.5736	Fail	0.308999
604	Img-01-08-2021 23-57-57.jpg	FruitKnife	836	388	440	256	36.2553	0.643224	29.6522	Success	0.363999
605	Img-01-08-2021 23-58-05.jpg	GreenGlue	889	486	494	106	51.8449	0.10325	17.9489	Fail	0.31
606	Img-01-08-2021 23-58-05.jpg	FruitKnife	-472	1131	440	256	-0.871051	0	41.8419	Fail	0.409
607	Img-01-08-2021 23-58-07.jpg	GreenGlue	0	0	494	106	0	0	71.0116	Fail	0.338488
608	Img-01-08-2021 23-58-07.jpg	FruitKnife	271	299	440	256	-28.3163	0.852781	5.83954	Success	0.385426
609	Img-01-08-2021 23-58-23.jpg	GreenGlue	591	834	494	106	-55.2901	0	15.4156	Fail	0.339
610	Img-01-08-2021 23-58-23.jpg	FruitKnife	790	363	440	256	-68.0783	0.76406	13.6579	Success	0.362014
611	Img-01-08-2021 23-58-25.jpg	GreenGlue	0	0	494	106	0	0	73.6783	Fail	0.345514
612	Img-01-08-2021 23-58-25.jpg	FruitKnife	846	562	440	256	88.6086	0.711786	20.0712	Success	0.393511
613	Img-01-08-2021 23-58-42.jpg	FruitKnife	850	446	440	256	-53.7222	0.765221	11.1117	Success	0.415061
614	Img-01-08-2021 23-58-42.jpg	Pepper	314	591	366	156	73.4505	0.84303	2.95916	Success	0.394
615	Img-01-08-2021 23-58-44.jpg	FruitKnife	686	516	440	256	58.4832	0.51923	6.20731	Success	0.394997
616	Img-01-08-2021 23-58-44.jpg	Pepper	339	289	366	156	23.4896	0.932913	0.608456	Success	0.418036
617	Img-01-08-2021 23-58-46.jpg	FruitKnife	235	779	440	256	-66.5387	0.335956	1.16412	Success	0.368035
618	Img-01-08-2021 23-58-46.jpg	Pepper	835	407	366	156	-32.5697	0.905657	0.603926	Success	0.379001
619	Img-01-08-2021 23-58-50.jpg	FruitKnife	756	215	440	256	-38.5228	0.289725	8.32382	Success	0.398994
620	Img-01-08-2021 23-58-50.jpg	Pepper	423	633	366	156	-73.4144	0.834623	4.55011	Success	0.427529
621	Img-01-08-2021 23-58-52.jpg	FruitKnife	797	556	440	256	36.7529	0.645323	29.0696	Success	0.411
622	Img-01-08-2021 23-58-52.jpg	Pepper	291	314	366	156	-31.9671	0.941674	1.54763	Success	0.377522
623	Img-01-08-2021 23-58-54.jpg	FruitKnife	450	631	440	256	33.7209	0.737954	16.3835	Success	0.377999
624	Img-01-08-2021 23-58-54.jpg	Pepper	850	370	366	156	-65.5851	0.896009	4.2359	Success	0.392999
625	Img-01-08-2021 23-58-56.jpg	FruitKnife	214	530	440	256	-67.8763	0.612034	4.02217	Success	0.402992
626	Img-01-08-2021 23-58-56.jpg	Pepper	810	534	366	156	56.089	0.859921	5.56739	Success	0.459002
627	Img-01-08-2021 23-59-01.jpg	FruitKnife	824	348	440	256	-51.7731	0.906148	0.747455	Success	0.332
628	Img-01-08-2021 23-59-01.jpg	Pepper	382	616	366	156	-35.5547	0.823635	0.552792	Success	0.337026
629	Img-01-08-2021 23-59-03.jpg	FruitKnife	781	507	440	256	75.8658	0.59425	15.3141	Success	0.317971
630	Img-01-08-2021 23-59-03.jpg	Pepper	300	360	366	156	-88.9344	0.940106	1.8952	Success	0.320002
631	Img-01-08-2021 23-59-07.jpg	FruitKnife	378	600	440	256	17.0948	0.63956	29.9035	Success	0.317
632	Img-01-08-2021 23-59-07.jpg	Pepper	903	429	366	156	85.797	0.915357	3.48932	Success	0.342034
633	Img-01-08-2021 23-59-11.jpg	FruitKnife	262	610	440	256	62.7389	0.664438	7.26628	Success	0.350997
634	Img-01-08-2021 23-59-11.jpg	Pepper	789	318	366	156	13.2547	0.811584	8.1912	Success	0.336001
635	Img-01-08-2021 23-59-13.jpg	FruitKnife	321	468	440	256	-88.799	0.673464	18.5992	Success	0.296187
636	Img-01-08-2021 23-59-13.jpg	Pepper	779	599	366	156	-19.4516	0.85638	4.8289	Success	0.332514
637	Img-01-08-2021 23-59-20.jpg	FruitKnife	422	941	440	256	12.9621	0.0679425	86.3227	Fail	0.306973
638	Img-01-08-2021 23-59-20.jpg	Pepper	922	375	366	156	-73.0385	0.977308	0.960154	Success	0.334
639	Img-01-08-2021 23-59-22.jpg	FruitKnife	288	331	440	256	37.0833	0.654701	2.62004	Success	0.311975
640	Img-01-08-2021 23-59-22.jpg	Pepper	773	658	366	156	-42.4272	0.868933	3.86696	Success	0.304999
641	Img-02-08-2021 00-03-29.jpg	MilkBottle	0	0	532	238	0	0	59.5514	Fail	0.290034
642	Img-02-08-2021 00-03-29.jpg	FruitKnife	924	308	440	256	42.7907	0.760374	13.9341	Success	0.304996
643	Img-02-08-2021 00-03-32.jpg	MilkBottle	493	186	532	238	-21.8386	0.133995	40.73	Fail	0.289175
644	Img-02-08-2021 00-03-32.jpg	FruitKnife	963	602	440	256	4.99118	0.914296	0.992429	Success	0.305714
645	Img-02-08-2021 00-03-36.jpg	MilkBottle	0	0	532	238	0	0	53.4414	Fail	0.287325
646	Img-02-08-2021 00-03-36.jpg	FruitKnife	334	461	440	256	-71.8204	0.957099	2.13212	Success	0.302792
647	Img-02-08-2021 00-03-42.jpg	MilkBottle	0	0	532	238	0	0	15.7154	Fail	0.294946
648	Img-02-08-2021 00-03-42.jpg	FruitKnife	883	281	440	256	-43.2879	0.776161	5.815	Success	0.30303
649	Img-02-08-2021 00-04-41.jpg	PaperKnife	871	391	532	146	32.1046	0.294434	36.4255	Fail	0.300974
650	Img-02-08-2021 00-04-41.jpg	RedMedicine	448	671	324	142	-47.4814	0.951567	1.85019	Success	0.325001
651	Img-02-08-2021 00-04-46.jpg	PaperKnife	308	649	532	146	-28.3689	0.800876	0.0889961	Success	0.322998
652	Img-02-08-2021 00-04-46.jpg	RedMedicine	796	432	324	142	-70.9134	0.836965	4.67554	Success	0.334998
653	Img-02-08-2021 00-04-51.jpg	PaperKnife	788	409	532	146	-13.798	0.883376	0.256352	Success	0.31405
654	Img-02-08-2021 00-04-51.jpg	RedMedicine	355	591	324	142	-58.8933	0.865255	5.39766	Success	0.319976
655	Img-02-08-2021 00-04-53.jpg	PaperKnife	760	612	532	146	19.6349	0.916767	0.227575	Success	0.335002
656	Img-02-08-2021 00-04-53.jpg	RedMedicine	316	317	324	142	-25.751	0.964162	1.49528	Success	0.325001
657	Img-02-08-2021 00-07-56.jpg	SmallMedicine	469	613	260	158	67.3069	0.82352	11.6454	Success	0.303062
658	Img-02-08-2021 00-07-56.jpg	MilkBottle	0	0	532	238	0	0	39.7785	Fail	0.302027
659	Img-02-08-2021 00-07-59.jpg	SmallMedicine	672	689	260	158	-63.7101	0.779534	2.47086	Success	0.296975
660	Img-02-08-2021 00-07-59.jpg	MilkBottle	0	0	532	238	0	0	36.6799	Fail	0.327008
661	Img-02-08-2021 00-08-30.jpg	SmallMedicine	625	656	260	158	-58.59	0.872098	6.75789	Success	0.287003
662	Img-02-08-2021 00-08-30.jpg	MilkBottle	0	0	532	238	0	0	45.6706	Fail	0.296973
663	Img-02-08-2021 00-08-45.jpg	CokeBottle	0	0	576	202	0	0	44.2575	Fail	0.297037
664	Img-02-08-2021 00-08-45.jpg	SmallMedicine	720	647	260	158	-41.7964	0.895176	5.38683	Success	0.294017
665	Img-02-08-2021 00-08-58.jpg	CokeBottle	0	0	576	202	0	0	59.2967	Fail	0.290971
666	Img-02-08-2021 00-08-58.jpg	SmallMedicine	406	555	260	158	58.4985	0.866344	7.87219	Success	0.291052
667	Img-02-08-2021 00-10-09.jpg	CokeBottle	0	0	576	202	0	0	71.9235	Fail	0.307974
668	Img-02-08-2021 00-10-09.jpg	ABBottle	684	587	474	186	-29.9388	0.842271	1.17211	Success	0.332999
669	Img-02-08-2021 00-10-47.jpg	ABBottle	440	487	474	186	60.4448	0.819549	6.72445	Success	0.331996
670	Img-02-08-2021 00-10-47.jpg	GreenSoap	816	497	396	274	-25.7514	0.911642	2.92666	Success	0.339013
671	Img-02-08-2021 00-10-51.jpg	ABBottle	384	587	474	186	-57.8841	0.912422	1.6876	Success	0.325982
672	Img-02-08-2021 00-10-51.jpg	GreenSoap	740	420	396	274	11.94	0.950367	1.26071	Success	0.347997
673	Img-02-08-2021 00-10-56.jpg	ABBottle	427	551	474	186	-50.4358	0.90413	3.67471	Success	0.316973
674	Img-02-08-2021 00-10-56.jpg	GreenSoap	702	396	396	274	-3.05165	0.840021	7.91551	Success	0.316976
675	Img-02-08-2021 00-11-04.jpg	ABBottle	632	363	474	186	-61.2005	0.733106	0.196006	Success	0.321
676	Img-02-08-2021 00-11-04.jpg	GreenSoap	325	562	396	274	63.3268	0.919778	0.669223	Success	0.344005
677	Img-14-05-2021 23-00-26.jpg	PaperKnife	7723	-4193	532	146	72.0238	0	51.769	Fail	0.327999
678	Img-14-05-2021 23-00-26.jpg	T1	810	633	432	114	-10.4239	0.835823	4.90806	Success	0.331986
679	Img-14-05-2021 23-00-28.jpg	PaperKnife	348	412	532	146	-44.0831	0.814901	5.37542	Success	0.313212
680	Img-14-05-2021 23-00-28.jpg	T1	943	412	432	114	-75.7275	0.732811	7.24223	Success	0.319021
681	Img-14-05-2021 23-00-35.jpg	PaperKnife	879	660	532	146	6.00152	0.734555	7.29434	Success	0.305869
682	Img-14-05-2021 23-00-35.jpg	T1	629	571	432	114	-80.8339	0	46.1062	Fail	0.336997
683	Img-14-05-2021 23-00-47.jpg	PaperKnife	442	611	532	146	-47.4013	0.819874	4.06282	Success	0.298324
684	Img-14-05-2021 23-00-47.jpg	T1	659	285	432	114	-23.3817	0.869856	0.55218	Success	0.308269
685	Img-14-05-2021 23-01-04.jpg	PaperKnife	558	709	532	146	-1.45973	0.867176	2.37244	Success	0.302977
686	Img-14-05-2021 23-01-04.jpg	T1	866	288	432	114	-11.917	0.829577	1.03039	Success	0.331014
687	Img-14-05-2021 23-01-12.jpg	PaperKnife	882	629	532	146	42.9534	0.722149	8.77785	Success	0.355001
688	Img-14-05-2021 23-01-12.jpg	T1	394	466	432	114	-47.5105	0.143153	5.21527	Fail	0.358001
689	Img-14-05-2021 23-01-14.jpg	PaperKnife	599	703	532	146	-0.322912	0.897799	2.94203	Success	0.35606
690	Img-14-05-2021 23-01-14.jpg	T1	911	396	432	114	-23.5955	0.00951274	0.565666	Fail	0.314008
691	Img-14-05-2021 23-01-22.jpg	PaperKnife	896	507	532	146	76.1803	0.550582	18.5613	Success	0.377989
692	Img-14-05-2021 23-01-22.jpg	T1	170	678	432	114	-43.1541	0	11.0396	Fail	0.318001
693	Img-14-05-2021 23-01-27.jpg	PaperKnife	779	659	532	146	-21.1754	0.847766	4.17651	Success	0.332001
694	Img-14-05-2021 23-01-27.jpg	T1	0	0	432	114	0	0	37.0901	Fail	0.301001
695	Img-14-05-2021 23-01-46.jpg	PaperKnife	861	372	532	146	15.9536	0.849272	0.73775	Success	0.315015
696	Img-14-05-2021 23-01-46.jpg	T1	0	0	432	114	0	0	26.0852	Fail	0.371997
697	Img-14-05-2021 23-01-50.jpg	PaperKnife	860	694	532	146	-18.6015	0.76504	7.7303	Success	0.341015
698	Img-14-05-2021 23-01-50.jpg	T1	347	354	432	114	16.8432	0.588577	4.46131	Success	0.370512
699	Img-14-05-2021 23-01-53.jpg	PaperKnife	657	681	532	146	41.2974	0.819228	5.11708	Success	0.341084
700	Img-14-05-2021 23-01-53.jpg	T1	303	322	432	114	-66.6709	0.703203	6.15157	Success	0.314031
701	Img-14-05-2021 23-01-57.jpg	PaperKnife	328	608	532	146	60.2607	0.782916	6.80987	Success	0.356689
702	Img-14-05-2021 23-01-57.jpg	T1	843	681	432	114	-25.0398	0.641736	2.53802	Success	0.332999
703	Img-14-05-2021 23-02-05.jpg	PaperKnife	788	288	532	146	-23.2465	0.867701	3.44217	Success	0.346999
704	Img-14-05-2021 23-02-05.jpg	T1	-240	-1467	432	114	-42.1329	0	4.2042	Fail	0.29901
705	Img-14-05-2021 23-02-29.jpg	PaperKnife	755	706	532	146	-16.8792	0.853031	3.52576	Success	0.314055
706	Img-14-05-2021 23-02-29.jpg	T1	623	363	432	114	-14.8416	0.811099	2.03626	Success	0.329999
707	Img-14-05-2021 23-02-35.jpg	PaperKnife	937	662	532	146	-25.4407	0.832438	5.42429	Success	0.315893
708	Img-14-05-2021 23-02-35.jpg	T1	329	675	432	114	-4.53533	0.317753	28.8861	Success	0.30052
709	Img-14-05-2021 23-02-42.jpg	PaperKnife	373	622	532	146	-22.2481	0.871921	2.08801	Success	0.341971
710	Img-14-05-2021 23-02-42.jpg	T1	878	369	432	114	-50.3576	0.830669	4.10478	Success	0.328
711	Img-14-05-2021 23-02-50.jpg	PaperKnife	803	632	532	146	-34.5027	0.947856	0.364856	Success	0.363
712	Img-14-05-2021 23-02-50.jpg	T1	307	298	432	114	-57.4269	0.173212	63.3412	Fail	0.327
713	Img-14-05-2021 23-03-09.jpg	PaperKnife	546	594	532	146	-6.31803	0.885899	2.6208	Success	0.340515
714	Img-14-05-2021 23-03-09.jpg	T1	1039	472	432	114	-10.0174	0.0444054	18.9605	Fail	0.322998
715	Img-14-05-2021 23-03-36.jpg	PaperKnife	378	443	532	146	-51.2799	0.790809	6.10886	Success	0.318038
716	Img-14-05-2021 23-03-36.jpg	T1	799	351	432	114	-13.4491	0.144611	83.891	Fail	0.31109
717	Img-14-05-2021 23-03-40.jpg	PaperKnife	985	542	532	146	63.4221	0.736923	8.32241	Success	0.360972
718	Img-14-05-2021 23-03-40.jpg	T1	448	629	432	114	-35.1838	0.690672	6.10067	Success	0.308032
719	Img-14-05-2021 23-03-44.jpg	PaperKnife	593	665	532	146	-17.6824	0.829548	2.57249	Success	0.343489
720	Img-14-05-2021 23-03-44.jpg	T1	744	239	432	114	-36.6716	0	50.307	Fail	0.325682
721	Img-14-05-2021 23-04-07.jpg	PaperKnife	797	666	532	146	-46.5772	0.795619	3.70338	Success	0.339001
722	Img-14-05-2021 23-04-07.jpg	T1	373	518	432	114	-2.50807	0.155181	79.1425	Fail	0.318003
723	Img-14-05-2021 23-04-13.jpg	PaperKnife	412	421	532	146	6.43394	0.834893	2.06309	Success	0.318556
724	Img-14-05-2021 23-04-13.jpg	T1	972	676	432	114	-28.4691	0.449418	13.0457	Success	0.295976
725	Img-16-07-2021 22-15-53.jpg	Pepper	738	338	366	156	76.8434	0.912502	2.5196	Success	0.31953
726	Img-16-07-2021 22-15-53.jpg	ABBottle	442	621	474	186	-32.7213	0.959343	0.193374	Success	0.335975
727	Img-16-07-2021 22-16-10.jpg	Pepper	292	543	366	156	-57.8246	0.847863	2.32758	Success	0.338999
728	Img-16-07-2021 22-16-10.jpg	ABBottle	822	511	474	186	-69.2091	0.855409	6.10003	Success	0.345002
729	Img-16-07-2021 22-16-28.jpg	Pepper	969	653	366	156	65.4503	0.828451	8.07238	Success	0.329334
730	Img-16-07-2021 22-16-28.jpg	ABBottle	332	445	474	186	-58.0446	0.909939	2.38159	Success	0.344999
731	Img-16-07-2021 22-16-33.jpg	Pepper	834	555	366	156	-61.8479	0.878111	4.24511	Success	0.343001
732	Img-16-07-2021 22-16-33.jpg	ABBottle	300	423	474	186	-59.313	0.812479	1.63182	Success	0.349504
733	Img-16-07-2021 22-16-37.jpg	Pepper	307	696	366	156	-80.0214	0.842943	0.938572	Success	0.330997
734	Img-16-07-2021 22-16-37.jpg	ABBottle	837	346	474	186	63.865	0.863314	2.39344	Success	0.346
735	Img-16-07-2021 22-16-49.jpg	Pepper	809	319	366	156	-88.9383	0.774049	9.8521	Success	0.3171
736	Img-16-07-2021 22-16-49.jpg	ABBottle	400	746	474	186	-45.5502	0.759897	0.977208	Success	0.342
737	Img-16-07-2021 22-17-01.jpg	Pepper	930	621	366	156	62.5813	0.974448	0.678807	Success	0.352008
738	Img-16-07-2021 22-17-01.jpg	ABBottle	389	330	474	186	-78.0634	0.957291	1.421	Success	0.343976
739	Img-16-07-2021 22-17-09.jpg	Pepper	280	547	366	156	-52.2578	0.976005	0.184327	Success	0.331016
740	Img-16-07-2021 22-17-09.jpg	ABBottle	858	522	474	186	32.7466	0.738233	12.5865	Success	0.346975
741	Img-16-07-2021 22-17-12.jpg	Pepper	298	560	366	156	-12.7265	0.937319	1.95867	Success	0.321539
742	Img-16-07-2021 22-17-12.jpg	ABBottle	942	562	474	186	-42.6559	0.894415	2.43821	Success	0.382
743	Img-16-07-2021 22-17-20.jpg	Pepper	238	707	366	156	-46.3203	0.852752	4.20835	Success	0.334559
744	Img-16-07-2021 22-17-20.jpg	ABBottle	783	446	474	186	-15.8688	0.719872	0.272049	Success	0.36853
745	Img-16-07-2021 22-17-23.jpg	Pepper	373	539	366	156	-25.5178	0.82293	4.76016	Success	0.332034
746	Img-16-07-2021 22-17-23.jpg	ABBottle	994	450	474	186	54.8885	0.882352	3.59237	Success	0.357999
747	Img-16-07-2021 22-17-40.jpg	Pepper	895	374	366	156	-75.7634	0.901678	2.9952	Success	0.307002
748	Img-16-07-2021 22-17-40.jpg	ABBottle	353	615	474	186	56.7894	0.840021	3.95997	Success	0.344985
749	Img-16-07-2021 22-17-46.jpg	Pepper	888	409	366	156	-30.1765	0.8469	0.316799	Success	0.342035
750	Img-16-07-2021 22-17-46.jpg	ABBottle	323	519	474	186	-48.6984	0.842421	1.47626	Success	0.360081
751	Img-16-07-2021 22-18-01.jpg	Pepper	282	538	366	156	-15.86	0.973778	0.930696	Success	0.411003
752	Img-16-07-2021 22-18-01.jpg	ABBottle	825	520	474	186	-55.1064	0.847897	6.15275	Success	0.403001
753	Img-16-07-2021 22-18-09.jpg	Pepper	366	454	366	156	-32.1943	0.638447	5.22751	Success	0.430002
754	Img-16-07-2021 22-18-09.jpg	ABBottle	874	640	474	186	61.2734	0.886128	0.00643875	Success	0.459996
755	Img-16-07-2021 22-18-18.jpg	Pepper	927	415	366	156	79.6736	0.795816	8.64643	Success	0.448521
756	Img-16-07-2021 22-18-18.jpg	ABBottle	322	595	474	186	-43.94	0.95446	0.313312	Success	0.464999
757	Img-16-07-2021 22-18-56.jpg	Shampoo	909	527	448	170	-2.39254	0.981929	0.454965	Success	0.479003
758	Img-16-07-2021 22-18-56.jpg	LaptopClean	316	529	442	174	0.0214467	0.859133	2.31694	Success	0.453
759	Img-16-07-2021 22-18-59.jpg	Shampoo	842	545	448	170	-50.9102	0.939575	0.615421	Success	0.60352
760	Img-16-07-2021 22-18-59.jpg	LaptopClean	319	302	442	174	70.1325	0.792999	1.17351	Success	0.509995
761	Img-16-07-2021 22-19-03.jpg	Shampoo	935	667	448	170	-21.1965	0.950871	0.0126586	Success	0.459522
762	Img-16-07-2021 22-19-03.jpg	LaptopClean	333	321	442	174	-19.1	0.702054	0.882976	Success	0.446999
763	Img-16-07-2021 22-19-13.jpg	Shampoo	318	330	448	170	-17.294	0.952833	1.52287	Success	0.426003
764	Img-16-07-2021 22-19-13.jpg	LaptopClean	813	689	442	174	-19.4052	0.94983	1.78606	Success	0.529554
765	Img-16-07-2021 22-19-33.jpg	Shampoo	866	697	448	170	-11.3995	0.923624	0.942947	Success	0.551565
766	Img-16-07-2021 22-19-33.jpg	LaptopClean	411	493	442	174	23.7273	0.826137	6.46276	Success	0.615999
767	Img-16-07-2021 22-19-36.jpg	Shampoo	849	494	448	170	86.8307	0.916046	2.93924	Success	0.555524
768	Img-16-07-2021 22-19-36.jpg	LaptopClean	278	321	442	174	77.0976	0.833247	3.75296	Success	0.855999
769	Img-16-07-2021 22-19-42.jpg	Shampoo	940	651	448	170	-26.2017	0.967537	0.970263	Success	0.38965
770	Img-16-07-2021 22-19-42.jpg	LaptopClean	386	350	442	174	-1.10637	0.861492	5.40529	Success	0.507999
771	Img-16-07-2021 22-19-45.jpg	Shampoo	946	598	448	170	-81.0956	0.928674	0.181836	Success	0.469815
772	Img-16-07-2021 22-19-45.jpg	LaptopClean	416	456	442	174	55.8089	0.908836	1.9475	Success	0.475
773	Img-16-07-2021 22-20-13.jpg	Shampoo	936	555	448	170	-40.7048	0.945932	1.47965	Success	0.693999
774	Img-16-07-2021 22-20-13.jpg	LaptopClean	395	438	442	174	-50.1227	0.837802	4.48895	Success	0.679001
775	Img-16-07-2021 22-20-20.jpg	Shampoo	935	398	448	170	-79.6662	0.927763	0.128782	Success	0.367995
776	Img-16-07-2021 22-20-20.jpg	LaptopClean	382	508	442	174	-50.1753	0.852497	4.26019	Success	0.345525
777	Img-16-07-2021 22-20-33.jpg	Shampoo	829	478	448	170	65.688	0.94541	2.07071	Success	0.350975
778	Img-16-07-2021 22-20-33.jpg	LaptopClean	355	605	442	174	-44.7165	0.829519	1.81075	Success	0.336998
779	Img-16-07-2021 22-21-00.jpg	Shampoo	338	354	448	170	73.6224	0.951783	0.29712	Success	0.339022
780	Img-16-07-2021 22-21-00.jpg	LaptopClean	878	445	442	174	-55.8052	0.802958	4.03808	Success	0.356054
781	Img-16-07-2021 22-21-03.jpg	Shampoo	324	428	448	170	-72.6562	0.947459	1.67692	Success	0.343014
782	Img-16-07-2021 22-21-03.jpg	LaptopClean	912	384	442	174	81.5672	0.90807	3.6593	Success	0.323001
783	Img-16-07-2021 22-21-05.jpg	Shampoo	312	698	448	170	-3.71311	0.88683	1.51409	Success	0.327043
784	Img-16-07-2021 22-21-05.jpg	LaptopClean	903	424	442	174	2.55606	0.817848	1.62594	Success	0.344035
785	Img-16-07-2021 22-21-16.jpg	Shampoo	921	421	448	170	61.6301	0.920722	3.15694	Success	0.32237
786	Img-16-07-2021 22-21-16.jpg	LaptopClean	441	555	442	174	-28.9191	0.926308	0.8774	Success	0.323968
787	Img-16-07-2021 22-26-00.jpg	CokeBottle	0	0	576	202	0	0	18.7804	Fail	0.342972
788	Img-16-07-2021 22-26-00.jpg	HandClean	861	568	392	214	-30.0032	0.91703	3.04836	Success	0.418506
789	Img-16-07-2021 22-26-13.jpg	CokeBottle	0	0	576	202	0	0	12.0352	Fail	0.329994
790	Img-16-07-2021 22-26-13.jpg	HandClean	301	389	392	214	-22.6636	0.886914	0.74092	Success	0.402999
791	Img-16-07-2021 22-26-16.jpg	CokeBottle	-1137	-1700	576	202	-38.8444	0	7.22406	Fail	0.335972
792	Img-16-07-2021 22-26-16.jpg	HandClean	237	516	392	214	52.8025	0.948708	0.425206	Success	0.376039
793	Img-16-07-2021 22-26-26.jpg	CokeBottle	0	0	576	202	0	0	36.7048	Fail	0.331009
794	Img-16-07-2021 22-26-26.jpg	HandClean	280	444	392	214	61.6493	0.913289	0.767533	Success	0.377021
795	Img-16-07-2021 22-27-01.jpg	CokeBottle	0	0	576	202	0	0	60.1193	Fail	0.327967
796	Img-16-07-2021 22-27-01.jpg	HandClean	905	366	392	214	51.6458	0.928869	3.47826	Success	0.38377
797	Img-16-07-2021 22-27-11.jpg	CokeBottle	0	0	576	202	0	0	83.0064	Fail	0.309969
798	Img-16-07-2021 22-27-11.jpg	HandClean	924	566	392	214	-73.9002	0.922073	3.54479	Success	0.390073
799	Img-16-07-2021 22-27-19.jpg	CokeBottle	0	0	576	202	0	0	65.7613	Fail	0.303973
800	Img-16-07-2021 22-27-19.jpg	HandClean	1024	468	392	214	60.1414	0.976562	1.0306	Success	0.380548
801	Img-16-07-2021 22-27-22.jpg	CokeBottle	0	0	576	202	0	0	78.8894	Fail	0.303007
802	Img-16-07-2021 22-27-22.jpg	HandClean	236	615	392	214	83.5431	0.931376	0.851707	Success	0.386
803	Img-16-07-2021 22-27-43.jpg	CokeBottle	0	0	576	202	0	0	5.30345	Fail	0.323996
804	Img-16-07-2021 22-27-43.jpg	HandClean	295	404	392	214	60.0373	0.889938	1.69967	Success	0.383065
805	Img-16-07-2021 22-27-48.jpg	CokeBottle	0	0	576	202	0	0	86.5415	Fail	0.324523
806	Img-16-07-2021 22-27-48.jpg	HandClean	902	495	392	214	55.9861	0.863666	2.58453	Success	0.383999
807	Img-16-07-2021 22-27-58.jpg	CokeBottle	0	0	576	202	0	0	74.4704	Fail	0.320505
808	Img-16-07-2021 22-27-58.jpg	HandClean	344	614	392	214	60.4322	0.95869	0.876293	Success	0.368002
809	Img-16-07-2021 22-28-30.jpg	CokeBottle	0	0	576	202	0	0.0120698	72.9109	Fail	0.312975
810	Img-16-07-2021 22-28-30.jpg	HandClean	918	480	392	214	52.2527	0.878095	0.843316	Success	0.395998
811	Img-16-07-2021 22-29-31.jpg	PaperKnife	307	518	532	146	4.08358	0.884967	3.16051	Success	0.322039
812	Img-16-07-2021 22-29-31.jpg	DrillCover	658	507	454	148	-36.2226	0.161308	36.9822	Fail	0.322
813	Img-16-07-2021 22-29-45.jpg	PaperKnife	898	339	532	146	-6.28462	0.828021	3.09464	Success	0.308034
814	Img-16-07-2021 22-29-45.jpg	DrillCover	0	0	454	148	0	0	39.3326	Fail	0.314996
815	Img-16-07-2021 22-29-49.jpg	PaperKnife	979	439	532	146	35.8692	0.57542	16.876	Success	0.31401
816	Img-16-07-2021 22-29-49.jpg	DrillCover	277	556	454	148	-62.2062	0.305322	42.2492	Fail	0.333061
817	Img-16-07-2021 22-29-51.jpg	PaperKnife	889	543	532	146	-13.0586	0.8691	3.79289	Success	0.323999
818	Img-16-07-2021 22-29-51.jpg	DrillCover	369	394	454	148	71.821	0.38951	15.8284	Success	0.302999
819	Img-16-07-2021 22-30-04.jpg	PaperKnife	363	462	532	146	87.7613	0.906658	0.527015	Success	0.315005
820	Img-16-07-2021 22-30-04.jpg	DrillCover	0	0	454	148	0	0	79.9847	Fail	0.313035
821	Img-16-07-2021 22-30-16.jpg	PaperKnife	374	571	532	146	-87.1575	0.719679	9.41833	Success	0.324976
822	Img-16-07-2021 22-30-16.jpg	DrillCover	738	-121	454	148	-13.3653	0	51.829	Fail	0.307987
823	Img-16-07-2021 22-30-23.jpg	PaperKnife	360	321	532	146	3.4037	0.202322	36.714	Fail	0.30602
824	Img-16-07-2021 22-30-23.jpg	DrillCover	638	431	454	148	-35.6194	0	7.77455	Fail	0.315979
825	Img-16-07-2021 22-30-34.jpg	PaperKnife	853	610	532	146	0.608652	0.943242	0.428247	Success	0.302924
826	Img-16-07-2021 22-30-34.jpg	DrillCover	423	336	454	148	-23.5102	0.280277	31.3236	Fail	0.297898
827	Img-16-07-2021 22-30-50.jpg	PaperKnife	1085	150	532	146	36.1651	0	38.2364	Fail	0.327104
828	Img-16-07-2021 22-30-50.jpg	DrillCover	0	0	454	148	0	0	11.1952	Fail	0.318563
829	Img-16-07-2021 22-31-00.jpg	PaperKnife	805	569	532	146	-85.4189	0.949416	1.1088	Success	0.325974
830	Img-16-07-2021 22-31-00.jpg	DrillCover	511	976	454	148	-71.7123	0	4.84038	Fail	0.287001
831	Img-16-07-2021 22-31-02.jpg	PaperKnife	886	301	532	146	-25.0353	0.808385	3.10249	Success	0.340997
832	Img-16-07-2021 22-31-02.jpg	DrillCover	99	692	454	148	74.1937	0.0580853	89.7665	Fail	0.332998
833	Img-16-07-2021 22-31-07.jpg	PaperKnife	808	599	532	146	-30.9332	0.911214	1.68446	Success	0.338001
834	Img-16-07-2021 22-31-07.jpg	DrillCover	438	869	454	148	-61.8782	0	17.7224	Fail	0.327011
835	Img-16-07-2021 22-31-12.jpg	PaperKnife	370	653	532	146	-28.9863	0.53759	3.16278	Success	0.336975
836	Img-16-07-2021 22-31-12.jpg	DrillCover	886	415	454	148	-24.1634	0.23858	57.7992	Fail	0.286028
837	Img-16-07-2021 22-31-16.jpg	PaperKnife	390	422	532	146	-1.0768	0.854494	4.56907	Success	0.308998
838	Img-16-07-2021 22-31-16.jpg	DrillCover	0	0	454	148	0	0	75.3296	Fail	0.296033
839	Img-16-07-2021 22-31-18.jpg	PaperKnife	388	389	532	146	64.9383	0.90688	2.47103	Success	0.305999
840	Img-16-07-2021 22-31-18.jpg	DrillCover	5222	-681	454	148	-37.7069	0	57.0323	Fail	0.291975
841	Img-16-07-2021 22-31-21.jpg	PaperKnife	342	623	532	146	-46.1311	0.69917	8.82333	Success	0.311032
842	Img-16-07-2021 22-31-21.jpg	DrillCover	0	0	454	148	0	0	46.998	Fail	0.314032
843	Img-16-07-2021 22-31-23.jpg	PaperKnife	357	525	532	146	73.4906	0.755063	7.97458	Success	0.331021
844	Img-16-07-2021 22-31-23.jpg	DrillCover	0	0	454	148	0	0	74.1827	Fail	0.283
845	Img-16-07-2021 22-31-26.jpg	PaperKnife	850	309	532	146	-17.976	0.347043	9.44505	Success	0.304975
846	Img-16-07-2021 22-31-26.jpg	DrillCover	565	569	454	148	-48.1442	0.206878	71.9669	Fail	0.298999
847	Img-16-07-2021 22-32-36.jpg	O2	877	538	438	184	41.6894	0.866547	4.59777	Success	0.325019
848	Img-16-07-2021 22-32-36.jpg	RedMedicine	401	480	324	142	-39.0195	0.83895	3.1299	Success	0.309
849	Img-16-07-2021 22-32-40.jpg	O2	875	461	438	184	-5.98273	0.917489	0.521946	Success	0.316004
850	Img-16-07-2021 22-32-40.jpg	RedMedicine	342	515	324	142	11.7452	0.817459	8.19526	Success	0.325999
851	Img-16-07-2021 22-32-48.jpg	O2	955	585	438	184	26.8517	0.9232	3.05504	Success	0.322975
852	Img-16-07-2021 22-32-48.jpg	RedMedicine	372	416	324	142	-7.63313	0.773918	0.801322	Success	0.336001
853	Img-16-07-2021 22-32-52.jpg	O2	306	471	438	184	-48.0429	0.767058	1.61992	Success	0.326998
854	Img-16-07-2021 22-32-52.jpg	RedMedicine	856	443	324	142	-82.422	0.912849	2.22057	Success	0.31
855	Img-16-07-2021 22-32-55.jpg	O2	393	352	438	184	0.145488	0.820831	8.18363	Success	0.330986
856	Img-16-07-2021 22-32-55.jpg	RedMedicine	948	698	324	142	32.1057	0.732173	15.4443	Success	0.300993
857	Img-16-07-2021 22-33-03.jpg	O2	927	588	438	184	32.1686	0.944653	0.876074	Success	0.309003
858	Img-16-07-2021 22-33-03.jpg	RedMedicine	410	368	324	142	-3.15077	0.832522	0.75743	Success	0.337
859	Img-16-07-2021 22-33-06.jpg	O2	350	540	438	184	-67.2251	0.879425	1.61291	Success	0.311996
860	Img-16-07-2021 22-33-06.jpg	RedMedicine	881	387	324	142	-80.4102	0.876834	4.0272	Success	0.337997
861	Img-16-07-2021 22-33-12.jpg	O2	333	390	438	184	66.0476	0.910648	1.0232	Success	0.326015
862	Img-16-07-2021 22-33-12.jpg	RedMedicine	810	659	324	142	-31.1056	0.930398	2.38909	Success	0.336999
863	Img-16-07-2021 22-33-14.jpg	O2	437	648	438	184	-44.7181	0.894046	4.42419	Success	0.317002
864	Img-16-07-2021 22-33-14.jpg	RedMedicine	795	283	324	142	-81.591	0.937068	1.62814	Success	0.326853
865	Img-16-07-2021 22-33-17.jpg	O2	888	581	438	184	-61.1251	0.888096	3.89282	Success	0.326973
866	Img-16-07-2021 22-33-17.jpg	RedMedicine	498	295	324	142	68.8403	0.8459	0.597577	Success	0.324
867	Img-16-07-2021 22-33-22.jpg	O2	952	525	438	184	-68.0868	0.830502	7.33126	Success	0.344011
868	Img-16-07-2021 22-33-22.jpg	RedMedicine	461	499	324	142	-35.6274	0.881908	1.49612	Success	0.328001
869	Img-16-07-2021 22-33-35.jpg	O2	960	536	438	184	-30.5267	0.850194	1.79303	Success	0.314
870	Img-16-07-2021 22-33-35.jpg	RedMedicine	397	476	324	142	-28.6785	0.936886	1.78458	Success	0.322001
871	Img-16-07-2021 22-33-44.jpg	O2	359	609	438	184	66.3109	0.820868	8.18124	Success	0.313999
872	Img-16-07-2021 22-33-44.jpg	RedMedicine	883	521	324	142	-73.2503	0.880829	2.95817	Success	0.313035
873	Img-16-07-2021 22-33-47.jpg	O2	449	368	438	184	26.6111	0.825244	8.45058	Success	0.308634
874	Img-16-07-2021 22-33-47.jpg	RedMedicine	880	605	324	142	-5.00184	0.896254	1.19269	Success	0.306869
875	Img-16-07-2021 22-34-02.jpg	O2	893	605	438	184	-18.1139	0.946712	1.40158	Success	0.341999
876	Img-16-07-2021 22-34-02.jpg	RedMedicine	291	496	324	142	-25.5127	0.895929	3.763	Success	0.346011
877	Img-16-07-2021 22-34-08.jpg	O2	377	525	438	184	83.3612	0.832888	0.181395	Success	0.333001
878	Img-16-07-2021 22-34-08.jpg	RedMedicine	870	572	324	142	-38.6837	0.887951	0.648295	Success	0.319
879	Img-16-07-2021 22-34-14.jpg	O2	946	382	438	184	-43.6063	0.910228	3.88929	Success	0.320253
880	Img-16-07-2021 22-34-14.jpg	RedMedicine	501	707	324	142	-87.8377	0.957598	0.27324	Success	0.336
881	Img-16-07-2021 22-34-27.jpg	O2	410	498	438	184	53.0295	0.924104	1.93906	Success	0.324055
882	Img-16-07-2021 22-34-27.jpg	RedMedicine	914	545	324	142	-40.7847	0.915339	2.0773	Success	0.316032
883	Img-16-07-2021 22-34-34.jpg	O2	866	554	438	184	49.2005	0.926586	2.89692	Success	0.314494
884	Img-16-07-2021 22-34-34.jpg	RedMedicine	342	331	324	142	80.9528	0.926365	2.06102	Success	0.326
885	Img-16-07-2021 22-34-57.jpg	O2	415	363	438	184	-75.1724	0.800296	3.77945	Success	0.334038
886	Img-16-07-2021 22-34-57.jpg	RedMedicine	969	499	324	142	2.79446	0.911481	3.43363	Success	0.341065
887	Img-16-07-2021 22-35-25.jpg	GreenSoap	310	387	396	274	47.864	0.876014	4.70484	Success	0.303982
888	Img-16-07-2021 22-35-25.jpg	MilkBottle	0	0	532	238	0	0	54.721	Fail	0.321001
889	Img-16-07-2021 22-35-29.jpg	GreenSoap	994	397	396	274	29.0198	0.852266	1.00292	Success	0.331016
890	Img-16-07-2021 22-35-29.jpg	MilkBottle	0	0	532	238	0	0	44.6534	Fail	0.307014
891	Img-16-07-2021 22-35-32.jpg	GreenSoap	888	582	396	274	-80.6362	0.935136	1.5158	Success	0.329037
892	Img-16-07-2021 22-35-32.jpg	MilkBottle	0	0	532	238	0	0	40.1316	Fail	0.316998
893	Img-16-07-2021 22-35-56.jpg	GreenSoap	309	635	396	274	-35.5124	0.85074	0.133921	Success	0.308975
894	Img-16-07-2021 22-35-56.jpg	MilkBottle	0	0	532	238	0	0	30.779	Fail	0.295032
895	Img-16-07-2021 22-36-01.jpg	GreenSoap	364	480	396	274	25.6528	0.910119	2.0509	Success	0.302526
896	Img-16-07-2021 22-36-01.jpg	MilkBottle	0	0	532	238	0	0	27.5768	Fail	0.318007
897	Img-16-07-2021 22-36-07.jpg	GreenSoap	380	507	396	274	-35.6777	0.950865	2.35625	Success	0.301995
898	Img-16-07-2021 22-36-07.jpg	MilkBottle	0	0	532	238	0	0	42.5079	Fail	0.289975
899	Img-16-07-2021 22-36-10.jpg	GreenSoap	380	502	396	274	-65.5399	0.925863	2.90131	Success	0.300997
900	Img-16-07-2021 22-36-10.jpg	MilkBottle	0	0	532	238	0	0	10.7221	Fail	0.292001
901	Img-16-07-2021 22-36-18.jpg	GreenSoap	357	435	396	274	-36.8029	0.887965	2.36787	Success	0.308994
902	Img-16-07-2021 22-36-18.jpg	MilkBottle	0	0	532	238	0	0	43.94	Fail	0.295998
903	Img-16-07-2021 22-36-30.jpg	GreenSoap	1010	503	396	274	-46.1757	0.919835	0.94064	Success	0.332973
904	Img-16-07-2021 22-36-30.jpg	MilkBottle	0	0	532	238	0	0	21.6802	Fail	0.302009
905	Img-16-07-2021 22-36-33.jpg	GreenSoap	1012	536	396	274	63.0546	0.856305	8.67636	Success	0.32197
906	Img-16-07-2021 22-36-33.jpg	MilkBottle	0	0	532	238	0	0	40.8995	Fail	0.314003
907	Img-16-07-2021 22-36-39.jpg	GreenSoap	918	450	396	274	-60.6905	0.961325	0.0215537	Success	0.309
908	Img-16-07-2021 22-36-39.jpg	MilkBottle	0	0	532	238	0	0	39.6605	Fail	0.300027
909	Img-16-07-2021 22-36-47.jpg	GreenSoap	1065	666	396	274	-46.4679	0.846054	2.25758	Success	0.317976
910	Img-16-07-2021 22-36-47.jpg	MilkBottle	0	0	532	238	0	0	65.938	Fail	0.291999
911	Img-16-07-2021 22-36-53.jpg	GreenSoap	408	732	396	274	40.9207	0.891219	1.70036	Success	0.296975
912	Img-16-07-2021 22-36-53.jpg	MilkBottle	0	0	532	238	0	0	42.2476	Fail	0.302056
913	Img-16-07-2021 22-36-56.jpg	GreenSoap	320	423	396	274	-19.3521	0.882112	4.14671	Success	0.323987
914	Img-16-07-2021 22-36-56.jpg	MilkBottle	0	0	532	238	0	0	44.0566	Fail	0.315986
915	Img-16-07-2021 22-37-04.jpg	GreenSoap	354	460	396	274	-26.8337	0.899381	2.18771	Success	0.30197
916	Img-16-07-2021 22-37-04.jpg	MilkBottle	0	0	532	238	0	0	35.6405	Fail	0.314031
917	Img-16-07-2021 22-37-09.jpg	GreenSoap	281	591	396	274	32.4268	0.839322	7.66974	Success	0.297975
918	Img-16-07-2021 22-37-09.jpg	MilkBottle	0	0	532	238	0	0	53.0191	Fail	0.301076
919	Img-16-07-2021 22-37-15.jpg	GreenSoap	313	427	396	274	64.4191	0.932244	2.12839	Success	0.323983
920	Img-16-07-2021 22-37-15.jpg	MilkBottle	0	0	532	238	0	0	43.6414	Fail	0.333014
921	Img-16-07-2021 22-37-31.jpg	GreenSoap	938	636	396	274	-6.99178	0.906852	1.04533	Success	0.348061
922	Img-16-07-2021 22-37-31.jpg	MilkBottle	0	0	532	238	0	0	32.3876	Fail	0.309999
923	Img-16-07-2021 22-37-36.jpg	GreenSoap	1003	560	396	274	69.8454	0.901036	5.00345	Success	0.328977
924	Img-16-07-2021 22-37-36.jpg	MilkBottle	0	0	532	238	0	0	41.7662	Fail	0.327
925	Img-16-07-2021 22-37-47.jpg	GreenSoap	955	358	396	274	61.4655	0.899649	1.47269	Success	0.321
926	Img-16-07-2021 22-37-47.jpg	MilkBottle	0	0	532	238	0	0	42.5088	Fail	0.310997
927	Img-16-07-2021 22-37-54.jpg	GreenSoap	984	415	396	274	57.1138	0.892627	2.79315	Success	0.329
928	Img-16-07-2021 22-37-54.jpg	MilkBottle	0	0	532	238	0	0	55.6739	Fail	0.313999
929	Img-16-07-2021 22-37-59.jpg	GreenSoap	949	644	396	274	0.478488	0.89883	2.16986	Success	0.323998
930	Img-16-07-2021 22-37-59.jpg	MilkBottle	0	0	532	238	0	0	13.962	Fail	0.316001
931	Img-16-07-2021 22-38-03.jpg	GreenSoap	942	597	396	274	-43.7265	0.925519	0.928859	Success	0.325
932	Img-16-07-2021 22-38-03.jpg	MilkBottle	0	0	532	238	0	0.00134028	29.3517	Fail	0.289998
933	Img-16-07-2021 22-39-15.jpg	Block	0	0	278	120	0	0	3.12145	Fail	0.305011
934	Img-16-07-2021 22-39-15.jpg	Yogurt	839	659	478	196	2.50472	0.849705	2.1353	Success	0.305003
935	Img-16-07-2021 22-39-18.jpg	Block	0	0	278	120	0	0	8.99158	Fail	0.298975
936	Img-16-07-2021 22-39-18.jpg	Yogurt	662	690	478	196	1.28805	0.903308	1.40413	Success	0.307997
937	Img-16-07-2021 22-39-20.jpg	Block	636	-541	278	120	7.00101	0	44.6438	Fail	0.290998
938	Img-16-07-2021 22-39-20.jpg	Yogurt	385	609	478	196	-43.4586	0.824934	0.649819	Success	0.333019
939	Img-16-07-2021 22-39-23.jpg	Block	0	0	278	120	0	0	16.2466	Fail	0.275847
940	Img-16-07-2021 22-39-23.jpg	Yogurt	353	573	478	196	82.23	0.753878	2.51769	Success	0.321682
941	Img-16-07-2021 22-39-30.jpg	Block	2465	-1836	278	120	-55.6691	0	87.1788	Fail	0.272197
942	Img-16-07-2021 22-39-30.jpg	Yogurt	430	512	478	196	-23.6814	0.831644	7.52833	Success	0.328015
943	Img-16-07-2021 22-39-33.jpg	Block	0	0	278	120	0	0	5.98827	Fail	0.289998
944	Img-16-07-2021 22-39-33.jpg	Yogurt	435	487	478	196	-68.7779	0.857023	4.32325	Success	0.328014
945	Img-16-07-2021 22-39-35.jpg	Block	0	0	278	120	0	0	52.452	Fail	0.295012
946	Img-16-07-2021 22-39-35.jpg	Yogurt	492	475	478	196	63.5302	0.964448	0.553933	Success	0.326002
947	Img-16-07-2021 22-39-40.jpg	Block	996	565	278	120	40.6597	0.892962	0.12476	Success	0.282544
948	Img-16-07-2021 22-39-40.jpg	Yogurt	446	437	478	196	-0.0409144	0.866661	5.06603	Success	0.335999
949	Img-16-07-2021 22-39-42.jpg	Block	0	0	278	120	0	0	1.03946	Fail	0.276225
950	Img-16-07-2021 22-39-42.jpg	Yogurt	437	381	478	196	-40.5784	0.940993	2.21482	Success	0.328023
951	Img-16-07-2021 22-39-45.jpg	Block	0	0	278	120	0	0	36.7694	Fail	0.283088
952	Img-16-07-2021 22-39-45.jpg	Yogurt	962	489	478	196	65.9919	0.919082	3.25908	Success	0.321872
953	Img-16-07-2021 22-39-50.jpg	Block	0	0	278	120	0	0	26.4089	Fail	0.292997
954	Img-16-07-2021 22-39-50.jpg	Yogurt	940	491	478	196	-22.3095	0.837969	2.27327	Success	0.309001
955	Img-16-07-2021 22-39-52.jpg	Block	0	0	278	120	0	0	18.2906	Fail	0.277008
956	Img-16-07-2021 22-39-52.jpg	Yogurt	781	631	478	196	-73.4567	0.914594	3.72308	Success	0.308014
957	Img-16-07-2021 22-40-00.jpg	Block	0	0	278	120	0	0	38.8546	Fail	0.286
958	Img-16-07-2021 22-40-00.jpg	Yogurt	469	452	478	196	-12.6137	0.942456	1.63893	Success	0.332882
959	Img-16-07-2021 22-40-04.jpg	Block	386	679	278	120	29.6028	0.644946	21.2681	Success	0.280033
960	Img-16-07-2021 22-40-04.jpg	Yogurt	591	293	478	196	-63.8321	0.910852	3.04472	Success	0.308997
961	Img-16-07-2021 22-40-15.jpg	Block	832	254	278	120	-25.3132	0.4401	35.8667	Fail	0.289593
962	Img-16-07-2021 22-40-15.jpg	Yogurt	755	620	478	196	-14.4547	0.860431	3.03354	Success	0.329165
963	Img-16-07-2021 22-40-17.jpg	Block	0	0	278	120	0	0	13.3974	Fail	0.294999
964	Img-16-07-2021 22-40-17.jpg	Yogurt	466	603	478	196	-56.9391	0.80689	4.85941	Success	0.320013
965	Img-16-07-2021 22-40-20.jpg	Block	0	0	278	120	0	0	45.2923	Fail	0.303998
966	Img-16-07-2021 22-40-20.jpg	Yogurt	455	442	478	196	60.4067	0.911057	0.461156	Success	0.385001
967	Img-16-07-2021 22-40-22.jpg	Block	0	0	278	120	0	0	72.1933	Fail	0.295994
968	Img-16-07-2021 22-40-22.jpg	Yogurt	638	278	478	196	0.0608916	0.93064	1.3862	Success	0.317016
969	Img-16-07-2021 22-40-25.jpg	Block	0	0	278	120	0	0	2.12422	Fail	0.301039
970	Img-16-07-2021 22-40-25.jpg	Yogurt	915	354	478	196	-67.4184	0.865463	4.07243	Success	0.339
971	Img-16-07-2021 22-40-31.jpg	Block	0	0	278	120	0	0	8.08621	Fail	0.294008
972	Img-16-07-2021 22-40-31.jpg	Yogurt	879	497	478	196	-27.8723	0.784038	3.14878	Success	0.341037
973	Img-16-07-2021 22-40-34.jpg	Block	0	0	278	120	0	0	75.9364	Fail	0.309025
974	Img-16-07-2021 22-40-34.jpg	Yogurt	859	625	478	196	76.6786	0.887434	4.65307	Success	0.358846
975	Img-16-07-2021 22-40-46.jpg	Block	445	680	278	120	-74.9768	0.507301	27.2643	Success	0.326
976	Img-16-07-2021 22-40-46.jpg	Yogurt	936	494	478	196	85.3503	0.872729	4.93318	Success	0.400001
977	Img-16-07-2021 22-40-53.jpg	Block	953	279	278	120	-26.4729	0.214424	77.3015	Fail	0.363996
978	Img-16-07-2021 22-40-53.jpg	Yogurt	417	656	478	196	-46.2781	0.72919	5.32543	Success	0.392998
979	Img-16-07-2021 22-41-00.jpg	Block	0	0	278	120	0	0	19.1126	Fail	0.358001
980	Img-16-07-2021 22-41-00.jpg	Yogurt	912	427	478	196	88.1724	0.875792	4.42446	Success	0.395019
981	Img-16-07-2021 22-41-15.jpg	Block	878	687	278	120	1.83173	0.794624	7.76965	Success	0.375001
982	Img-16-07-2021 22-41-15.jpg	Yogurt	396	346	478	196	-22.2125	0.931151	1.65477	Success	0.415998
983	Img-16-07-2021 22-41-17.jpg	Block	0	0	278	120	0	0	28.1512	Fail	0.361019
984	Img-16-07-2021 22-41-17.jpg	Yogurt	889	462	478	196	81.3533	0.910569	3.55137	Success	0.401016
985	Img-16-07-2021 22-41-20.jpg	Block	0	0	278	120	0	0	66.2812	Fail	0.359013
986	Img-16-07-2021 22-41-20.jpg	Yogurt	916	613	478	196	15.2568	0.84431	6.51922	Success	0.413001
987	Img-16-07-2021 22-41-23.jpg	Block	0	0	278	120	0	0	11.8239	Fail	0.376016
988	Img-16-07-2021 22-41-23.jpg	Yogurt	890	587	478	196	-34.7764	0.891104	2.99017	Success	0.377002
989	Img-16-07-2021 22-51-48.jpg	SmallMedicine	341	462	260	158	8.60945	0.840178	10.1279	Success	0.342995
990	Img-16-07-2021 22-51-48.jpg	T1	896	455	432	114	-24.8201	0.899331	1.3398	Success	0.343016
991	Img-16-07-2021 22-51-54.jpg	SmallMedicine	611	248	260	158	-59.1309	0.794276	10.4248	Success	0.320002
992	Img-16-07-2021 22-51-54.jpg	T1	705	607	432	114	-79.3076	0.637512	6.12073	Success	0.318998
993	Img-16-07-2021 22-51-56.jpg	SmallMedicine	648	227	260	158	66.8038	0.910934	1.6399	Success	0.335998
994	Img-16-07-2021 22-51-56.jpg	T1	663	684	432	114	-24.6508	0.851845	0.966866	Success	0.323996
995	Img-16-07-2021 22-52-02.jpg	SmallMedicine	939	297	260	158	68.1288	0.520813	48.444	Fail	0.313009
996	Img-16-07-2021 22-52-02.jpg	T1	513	650	432	114	-59.4997	0.586617	3.58208	Success	0.374762
997	Img-16-07-2021 22-52-05.jpg	SmallMedicine	971	325	260	158	31.7999	0.912744	4.83571	Success	0.354
998	Img-16-07-2021 22-52-05.jpg	T1	678	643	432	114	72.8682	0.152015	89.2484	Fail	0.367995
999	Img-16-07-2021 22-52-10.jpg	SmallMedicine	963	321	260	158	-65.0911	0.925995	1.93395	Success	0.335507
1000	Img-16-07-2021 22-52-10.jpg	T1	454	589	432	114	-82.5958	0.837021	3.83197	Success	0.336464
1001	Img-16-07-2021 22-52-14.jpg	SmallMedicine	970	332	260	158	36.1856	0.943861	3.02776	Success	0.359981
1002	Img-16-07-2021 22-52-14.jpg	T1	353	463	432	114	-17.5592	0.312797	12.1632	Success	0.400519
1003	Img-16-07-2021 22-52-18.jpg	SmallMedicine	1001	448	260	158	-72.3627	0.777853	11.9538	Success	0.395999
1004	Img-16-07-2021 22-52-18.jpg	T1	440	528	432	114	76.8465	0.677745	9.13802	Success	0.473002
1005	Img-16-07-2021 22-52-31.jpg	SmallMedicine	878	632	260	158	64.7224	0.914986	4.68616	Success	0.700002
1006	Img-16-07-2021 22-52-31.jpg	T1	401	303	432	114	-12.4066	0.64155	0.384327	Success	0.633
1007	Img-16-07-2021 22-52-33.jpg	SmallMedicine	874	641	260	158	34.046	0.946951	0.283992	Success	0.378001
1008	Img-16-07-2021 22-52-33.jpg	T1	509	281	432	114	50.8215	0.258628	37.6426	Fail	0.354548
1009	Img-16-07-2021 22-52-47.jpg	SmallMedicine	394	621	260	158	-68.5299	0.877784	1.38169	Success	0.32301
1010	Img-16-07-2021 22-52-47.jpg	T1	977	403	432	114	-22.4546	0.367521	28.2529	Success	0.362072
1011	Img-16-07-2021 22-52-51.jpg	SmallMedicine	382	440	260	158	33.8367	0.675685	24.8355	Success	0.341071
1012	Img-16-07-2021 22-52-51.jpg	T1	919	594	432	114	-65.3962	0.793028	2.20707	Success	0.323995
1013	Img-16-07-2021 22-52-58.jpg	SmallMedicine	913	273	260	158	18.0601	0.888159	1.64958	Success	0.316074
1014	Img-16-07-2021 22-52-58.jpg	T1	575	605	432	114	-85.3699	0.620257	13.3455	Success	0.352976
1015	Img-16-07-2021 22-53-09.jpg	SmallMedicine	899	603	260	158	-50.0327	0.933154	0.34863	Success	0.328019
1016	Img-16-07-2021 22-53-09.jpg	T1	4960	1772	432	114	-71.6055	0	38.7534	Fail	0.332543
1017	Img-16-07-2021 22-53-14.jpg	SmallMedicine	697	621	260	158	31.4122	0.894566	4.99998	Success	0.348
1018	Img-16-07-2021 22-53-14.jpg	T1	367	696	432	114	-53.1623	0.0108498	51.2017	Fail	0.433994
1019	Img-16-07-2021 22-56-29.jpg	PurpleMedicine	289	504	300	146	-79.2566	0.836118	0.230243	Success	0.333001
1020	Img-16-07-2021 22-56-29.jpg	SoftWash	814	609	390	264	51.2543	0.982021	0.507878	Success	0.335033
1021	Img-16-07-2021 22-56-33.jpg	PurpleMedicine	232	594	300	146	-4.43862	0.796432	11.5236	Success	0.310019
1022	Img-16-07-2021 22-56-33.jpg	SoftWash	794	337	390	264	5.18323	0.923041	4.52057	Success	0.333508
1023	Img-16-07-2021 22-56-53.jpg	PurpleMedicine	619	242	300	146	69.4326	0.810064	8.19885	Success	0.333209
1024	Img-16-07-2021 22-56-53.jpg	SoftWash	777	605	390	264	-20.3774	0.967062	1.64437	Success	0.348035
1025	Img-16-07-2021 22-56-58.jpg	PurpleMedicine	671	220	300	146	0.213955	0.882515	5.68593	Success	0.309014
1026	Img-16-07-2021 22-56-58.jpg	SoftWash	658	648	390	264	49.8662	0.919034	3.73686	Success	0.358089
1027	Img-16-07-2021 22-57-10.jpg	PurpleMedicine	778	261	300	146	-22.857	0.845715	0.271826	Success	0.330012
1028	Img-16-07-2021 22-57-10.jpg	SoftWash	508	624	390	264	20.3637	0.804854	11.7313	Success	0.350002
1029	Img-16-07-2021 22-57-17.jpg	PurpleMedicine	901	466	300	146	-0.653227	0.969453	0.834572	Success	0.31086
1030	Img-16-07-2021 22-57-17.jpg	SoftWash	377	506	390	264	-67.8046	0.899895	3.88132	Success	0.341998
1031	Img-16-07-2021 22-57-27.jpg	PurpleMedicine	978	549	300	146	-9.90957	0.902218	1.95065	Success	0.339037
1032	Img-16-07-2021 22-57-27.jpg	SoftWash	386	472	390	264	64.1292	0.951748	2.26704	Success	0.337038
1033	Img-16-07-2021 22-57-48.jpg	PurpleMedicine	558	646	300	146	-0.0115427	0.717878	13.8664	Success	0.327035
1034	Img-16-07-2021 22-57-48.jpg	SoftWash	896	326	390	264	14.8767	0.907591	5.37416	Success	0.31904
1035	Img-16-07-2021 22-57-50.jpg	PurpleMedicine	533	647	300	146	-45.8826	0.935233	2.78055	Success	0.336343
1036	Img-16-07-2021 22-57-50.jpg	SoftWash	916	356	390	264	53.6133	0.958158	1.74433	Success	0.336059
1037	Img-16-07-2021 22-58-00.jpg	PurpleMedicine	945	223	300	146	-85.4835	0.826241	1.13772	Success	0.310522
1038	Img-16-07-2021 22-58-00.jpg	SoftWash	520	608	390	264	64.6218	0.957065	2.12707	Success	0.329001
1039	Img-16-07-2021 22-58-05.jpg	PurpleMedicine	967	621	300	146	-17.8147	0.968015	0.0390223	Success	0.321001
1040	Img-16-07-2021 22-58-05.jpg	SoftWash	477	338	390	264	-15.3531	0.93348	2.85264	Success	0.318999
1041	Img-16-07-2021 22-58-10.jpg	PurpleMedicine	387	643	300	146	87.0208	0.892506	4.77026	Success	0.336034
1042	Img-16-07-2021 22-58-10.jpg	SoftWash	882	392	390	264	64.5893	0.961957	0.878031	Success	0.328384
1043	Img-16-07-2021 22-58-38.jpg	Xisat	976	577	526	144	-47.8511	0.93198	1.84459	Success	0.321993
1044	Img-16-07-2021 22-58-38.jpg	Glue	367	444	488	230	-39.2773	0.920046	0.520671	Success	0.384997
1045	Img-16-07-2021 22-58-57.jpg	Xisat	317	455	526	144	1.60001	0.957146	1.15009	Success	0.365022
1046	Img-16-07-2021 22-58-57.jpg	Glue	859	564	488	230	47.4536	0.916127	2.42201	Success	0.344537
1047	Img-16-07-2021 22-59-18.jpg	Xisat	893	601	526	144	-28.3017	0.899895	2.09957	Success	0.314002
1048	Img-16-07-2021 22-59-18.jpg	Glue	353	426	488	230	71.2409	0.92157	1.99645	Success	0.365021
1049	Img-16-07-2021 22-59-23.jpg	Xisat	927	607	526	144	26.2993	0.916648	2.03303	Success	0.320008
1050	Img-16-07-2021 22-59-23.jpg	Glue	400	274	488	230	1.25976	0.910291	0.816482	Success	0.391998
1051	Img-16-07-2021 22-59-37.jpg	Xisat	996	578	526	144	3.42714	0.913178	0.572313	Success	0.323886
1052	Img-16-07-2021 22-59-37.jpg	Glue	369	428	488	230	-42.7747	0.857605	0.112747	Success	0.343035
1053	Img-16-07-2021 22-59-39.jpg	Xisat	929	595	526	144	-72.5315	0.837136	3.59564	Success	0.333997
1054	Img-16-07-2021 22-59-39.jpg	Glue	418	362	488	230	-15.5769	0.901712	1.66954	Success	0.344256
1055	Img-16-07-2021 23-00-12.jpg	Xisat	321	406	526	144	-10.3877	0.881122	2.25225	Success	0.335996
1056	Img-16-07-2021 23-00-12.jpg	Glue	887	580	488	230	0.724758	0.914701	1.28418	Success	0.362041
1057	Img-16-07-2021 23-00-24.jpg	Xisat	308	351	526	144	-7.59962	0.909616	0.844453	Success	0.310995
1058	Img-16-07-2021 23-00-24.jpg	Glue	823	644	488	230	-39.3565	0.967906	0.566888	Success	0.353013
1059	Img-16-07-2021 23-00-32.jpg	Xisat	903	575	526	144	-22.9204	0.876833	3.79746	Success	0.330002
1060	Img-16-07-2021 23-00-32.jpg	Glue	292	374	488	230	-31.0149	0.949884	1.51168	Success	0.36815
1061	Img-17-07-2021 00-04-29.jpg	PurpleMedicine	249	659	300	146	-26.9471	0.842631	7.1204	Success	0.302012
1062	Img-17-07-2021 00-04-29.jpg	CokeBottle	0	0	576	202	0	0	75.0821	Fail	0.326
1063	Img-17-07-2021 00-04-31.jpg	PurpleMedicine	273	469	300	146	-7.88508	0.804458	10.9246	Success	0.301007
1064	Img-17-07-2021 00-04-31.jpg	CokeBottle	0	0	576	202	0	0	35.6908	Fail	0.329027
1065	Img-17-07-2021 00-04-33.jpg	PurpleMedicine	250	460	300	146	6.38858	0.785787	0.901944	Success	0.29
1066	Img-17-07-2021 00-04-33.jpg	CokeBottle	0	0	576	202	0	0	1.53163	Fail	0.319
1067	Img-17-07-2021 00-04-36.jpg	PurpleMedicine	292	495	300	146	74.0818	0.782538	3.02291	Success	0.307022
1068	Img-17-07-2021 00-04-36.jpg	CokeBottle	0	0	576	202	0	0	73.7731	Fail	0.312501
1069	Img-17-07-2021 00-04-45.jpg	PurpleMedicine	895	460	300	146	-70.5914	0.761544	9.70843	Success	0.295
1070	Img-17-07-2021 00-04-45.jpg	CokeBottle	0	0	576	202	0	0	61.4304	Fail	0.319853
1071	Img-17-07-2021 00-04-54.jpg	PurpleMedicine	389	390	300	146	-55.0145	0.857048	2.51011	Success	0.30499
1072	Img-17-07-2021 00-04-54.jpg	CokeBottle	0	0	576	202	0	0	27.6579	Fail	0.302012
1073	Img-17-07-2021 00-04-56.jpg	PurpleMedicine	351	272	300	146	-5.88963	0.662958	0.00941873	Success	0.311
1074	Img-17-07-2021 00-04-56.jpg	CokeBottle	0	0	576	202	0	0	12.0259	Fail	0.325002
1075	Img-17-07-2021 00-05-04.jpg	PurpleMedicine	941	327	300	146	-28.392	0.928619	0.379942	Success	0.319858
1076	Img-17-07-2021 00-05-04.jpg	CokeBottle	0	0	576	202	0	0	4.99377	Fail	0.323024
1077	Img-17-07-2021 00-05-09.jpg	PurpleMedicine	954	567	300	146	-76.531	0.766606	8.76492	Success	0.289994
1078	Img-17-07-2021 00-05-09.jpg	CokeBottle	0	0	576	202	0	0	22.2427	Fail	0.322024
1079	Img-17-07-2021 00-05-29.jpg	Pepper	264	544	366	156	-73.2169	0.842344	1.84528	Success	0.299974
1080	Img-17-07-2021 00-05-29.jpg	CokeBottle	0	0	576	202	0	0	34.7222	Fail	0.321001
1081	Img-17-07-2021 00-05-32.jpg	Pepper	263	551	366	156	-46.2406	0.919154	3.28271	Success	0.316851
1082	Img-17-07-2021 00-05-32.jpg	CokeBottle	0	0	576	202	0	0	79.9775	Fail	0.301021
1083	Img-17-07-2021 00-05-36.jpg	Pepper	262	561	366	156	1.72645	0.631294	13.4992	Success	0.324359
1084	Img-17-07-2021 00-05-36.jpg	CokeBottle	0	0	576	202	0	0	23.0398	Fail	0.305971
1085	Img-17-07-2021 00-05-38.jpg	Pepper	293	553	366	156	-30.75	0.780608	1.0325	Success	0.315
1086	Img-17-07-2021 00-05-38.jpg	CokeBottle	0	0	576	202	0	0	65.5669	Fail	0.311968
1087	Img-17-07-2021 00-05-46.jpg	Pepper	334	540	366	156	-33.7753	0.997996	0.0830169	Success	0.332995
1088	Img-17-07-2021 00-05-46.jpg	CokeBottle	0	0	576	202	0	0	46.9402	Fail	0.358029
1089	Img-17-07-2021 00-05-49.jpg	Pepper	286	564	366	156	74.1802	0.786379	3.58072	Success	0.335032
1090	Img-17-07-2021 00-05-49.jpg	CokeBottle	874	551	576	202	63.67	0.460491	24.196	Success	0.316999
1091	Img-17-07-2021 00-05-53.jpg	Pepper	972	407	366	156	62.8432	0.920234	3.22376	Success	0.320095
1092	Img-17-07-2021 00-05-53.jpg	CokeBottle	0	0	576	202	0	0	58.5015	Fail	0.301
1093	Img-17-07-2021 00-05-55.jpg	Pepper	1040	421	366	156	15.1484	0.851743	6.66297	Success	0.327037
1094	Img-17-07-2021 00-05-55.jpg	CokeBottle	1163	1032	576	202	8.52964	0	30.9788	Fail	0.322996
1095	Img-17-07-2021 00-05-57.jpg	Pepper	1029	458	366	156	-36.8166	0.919499	2.70932	Success	0.309614
1096	Img-17-07-2021 00-05-57.jpg	CokeBottle	0	0	576	202	0	0	11.2959	Fail	0.327888
1097	Img-17-07-2021 00-06-00.jpg	Pepper	1017	477	366	156	-80.6258	0.842156	5.06981	Success	0.308998
1098	Img-17-07-2021 00-06-00.jpg	CokeBottle	0	0	576	202	0	0	55.8168	Fail	0.30201
1099	Img-17-07-2021 00-06-02.jpg	Pepper	970	481	366	156	39.1939	0.862559	4.06425	Success	0.313999
1100	Img-17-07-2021 00-06-02.jpg	CokeBottle	0	0	576	202	0	0	82.7452	Fail	0.297037
1101	Img-17-07-2021 00-06-05.jpg	Pepper	995	462	366	156	-11.4566	0.868237	3.21832	Success	0.321999
1102	Img-17-07-2021 00-06-05.jpg	CokeBottle	0	0	576	202	0	0	38.4318	Fail	0.296009
1103	Img-17-07-2021 00-06-15.jpg	Pepper	981	512	366	156	-16.1944	0.910466	2.57695	Success	0.324998
1104	Img-17-07-2021 00-06-15.jpg	CokeBottle	0	0	576	202	0	0	81.9488	Fail	0.424066
1105	Img-17-07-2021 00-06-17.jpg	Pepper	965	563	366	156	-64.4146	0.78792	0.819213	Success	0.552998
1106	Img-17-07-2021 00-06-17.jpg	CokeBottle	0	0	576	202	0	0	43.4272	Fail	0.390996
1107	Img-17-07-2021 00-06-51.jpg	Pepper	1024	618	366	156	-7.18663	0.809638	3.72925	Success	0.348009
1108	Img-17-07-2021 00-06-51.jpg	CokeBottle	338	814	576	202	-71.9005	0.247538	18.9755	Fail	0.318032
1109	Img-17-07-2021 00-06-55.jpg	Pepper	1018	333	366	156	-50.6456	0.890084	3.9349	Success	0.355239
1110	Img-17-07-2021 00-06-55.jpg	CokeBottle	0	0	576	202	0	0	52.0163	Fail	0.331616
1111	Img-17-07-2021 00-06-57.jpg	Pepper	1042	357	366	156	51.725	0.839582	7.74582	Success	0.342889
1112	Img-17-07-2021 00-06-57.jpg	CokeBottle	0	0	576	202	0	0	18.0008	Fail	0.304246
1113	Img-17-07-2021 00-07-12.jpg	MilkBottle	1961	449	532	238	-50.0305	0	55.0873	Fail	0.339008
1114	Img-17-07-2021 00-07-12.jpg	Glue	292	475	488	230	-60.8261	0.910502	0.105648	Success	0.351
1115	Img-17-07-2021 00-07-15.jpg	MilkBottle	0	0	532	238	0	0	45.6899	Fail	0.309858
1116	Img-17-07-2021 00-07-15.jpg	Glue	256	545	488	230	-13.0121	0.949109	0.353488	Success	0.341019
1117	Img-17-07-2021 00-07-20.jpg	MilkBottle	0	0	532	238	0	0	25.682	Fail	0.303998
1118	Img-17-07-2021 00-07-20.jpg	Glue	248	414	488	230	-79.502	0.865659	2.62923	Success	0.341138
1119	Img-17-07-2021 00-07-30.jpg	MilkBottle	0	0	532	238	0	0	18.1496	Fail	0.309844
1120	Img-17-07-2021 00-07-30.jpg	Glue	336	678	488	230	-17.7473	0.876116	2.78307	Success	0.330031
1121	Img-17-07-2021 00-07-38.jpg	MilkBottle	0	0	532	238	0	0	57.0794	Fail	0.313034
1122	Img-17-07-2021 00-07-38.jpg	Glue	957	505	488	230	-64.7488	0.978279	0.741724	Success	0.366882
1123	Img-17-07-2021 00-07-50.jpg	MilkBottle	0	0	532	238	0	0	42.1547	Fail	0.298011
1124	Img-17-07-2021 00-07-50.jpg	Glue	937	672	488	230	-9.26683	0.938352	1.3836	Success	0.337003
1125	Img-17-07-2021 00-08-07.jpg	MilkBottle	9882	1476	532	238	-42.3938	0	75.3409	Fail	0.316971
1126	Img-17-07-2021 00-08-07.jpg	Glue	366	442	488	230	-6.26152	0.943401	2.3117	Success	0.328015
1127	Img-17-07-2021 00-08-46.jpg	MilkBottle	0	0	532	238	0	0	37.8362	Fail	0.298996
1128	Img-17-07-2021 00-08-46.jpg	LaptopClean	408	467	442	174	82.2724	0.725907	11.7765	Success	0.325035
1129	Img-17-07-2021 00-09-02.jpg	MilkBottle	0	0	532	238	0	0	75.3228	Fail	0.327708
1130	Img-17-07-2021 00-09-02.jpg	LaptopClean	324	389	442	174	87.2498	0.835661	2.51402	Success	0.33604
1131	Img-17-07-2021 00-09-07.jpg	MilkBottle	953	538	532	238	-7.62113	0.84717	1.48236	Success	0.310063
1132	Img-17-07-2021 00-09-07.jpg	LaptopClean	365	444	442	174	6.30111	0.77568	8.1646	Success	0.328844
1133	Img-17-07-2021 00-09-10.jpg	MilkBottle	0	0	532	238	0	0	36.3597	Fail	0.306998
1134	Img-17-07-2021 00-09-10.jpg	LaptopClean	384	477	442	174	-52.635	0.701343	3.6631	Success	0.311011
1135	Img-17-07-2021 00-09-18.jpg	MilkBottle	0	0	532	238	0	0	37.304	Fail	0.30301
1136	Img-17-07-2021 00-09-18.jpg	LaptopClean	250	395	442	174	-28.4629	0.747454	1.10895	Success	0.302792
1137	Img-17-07-2021 00-09-27.jpg	MilkBottle	608	413	532	238	-33.8664	0.148204	60.6292	Fail	0.312969
1138	Img-17-07-2021 00-09-27.jpg	LaptopClean	989	342	442	174	1.80324	0.894957	2.65809	Success	0.319
1139	Img-17-07-2021 00-09-30.jpg	MilkBottle	0	0	532	238	0	0	40.4571	Fail	0.312392
1140	Img-17-07-2021 00-09-30.jpg	LaptopClean	1000	455	442	174	-43.2022	0.908776	1.73614	Success	0.320009
1141	Img-17-07-2021 00-09-33.jpg	MilkBottle	0	0	532	238	0	0	51.4924	Fail	0.302009
1142	Img-17-07-2021 00-09-33.jpg	LaptopClean	883	409	442	174	-39.1762	0.818971	3.26268	Success	0.331058
1143	Img-17-07-2021 00-09-35.jpg	MilkBottle	0	0	532	238	0	0	9.21171	Fail	0.313137
1144	Img-17-07-2021 00-09-35.jpg	LaptopClean	924	532	442	174	-4.38797	0.889838	3.11904	Success	0.327441
1145	Img-17-07-2021 00-09-42.jpg	MilkBottle	0	0	532	238	0	0	39.5065	Fail	0.317022
1146	Img-17-07-2021 00-09-42.jpg	LaptopClean	997	597	442	174	-40.4551	0.806426	0.067145	Success	0.314985
1147	Img-17-07-2021 00-10-42.jpg	Yogurt	931	352	478	196	-8.33414	0.84391	4.80504	Success	0.333
1148	Img-17-07-2021 00-10-42.jpg	Pepper	307	540	366	156	-26.0447	0.909119	0.108211	Success	0.312007
1149	Img-17-07-2021 00-10-49.jpg	Yogurt	939	538	478	196	-10.5263	0.847662	2.35704	Success	0.337003
1150	Img-17-07-2021 00-10-49.jpg	Pepper	276	458	366	156	-15.9188	0.777113	0.290258	Success	0.327996
1151	Img-17-07-2021 00-10-52.jpg	Yogurt	872	413	478	196	-65.315	0.91389	3.59099	Success	0.336028
1152	Img-17-07-2021 00-10-52.jpg	Pepper	316	446	366	156	70.0393	0.803294	0.57829	Success	0.348001
1153	Img-17-07-2021 00-10-59.jpg	Yogurt	337	542	478	196	-46.1171	0.768657	2.52883	Success	0.344852
1154	Img-17-07-2021 00-10-59.jpg	Pepper	938	431	366	156	38.3972	0.899362	3.10353	Success	0.333042
1155	Img-17-07-2021 00-11-03.jpg	Yogurt	299	405	478	196	-4.38818	0.869444	4.23822	Success	0.32
1156	Img-17-07-2021 00-11-03.jpg	Pepper	859	581	366	156	-13.4061	0.909461	0.760672	Success	0.332999
1157	Img-17-07-2021 00-11-13.jpg	Yogurt	365	494	478	196	-70.0998	0.892591	1.01001	Success	0.349002
1158	Img-17-07-2021 00-11-13.jpg	Pepper	1022	369	366	156	41.6441	0.598398	25.1434	Success	0.332512
1159	Img-17-07-2021 00-11-15.jpg	Yogurt	358	531	478	196	39.1915	0.894434	3.64935	Success	0.324854
1160	Img-17-07-2021 00-11-15.jpg	Pepper	980	472	366	156	72.0235	0.666769	5.9612	Success	0.343132
1161	Img-17-07-2021 00-11-18.jpg	Yogurt	406	519	478	196	-13.1008	0.92965	2.35152	Success	0.327975
1162	Img-17-07-2021 00-11-18.jpg	Pepper	905	440	366	156	-53.9269	0.863634	3.56412	Success	0.348976
1163	Img-17-07-2021 00-11-20.jpg	Yogurt	282	547	478	196	82.9327	0.779467	0.32045	Success	0.319919
1164	Img-17-07-2021 00-11-20.jpg	Pepper	964	543	366	156	0.329929	0.902427	1.95936	Success	0.352975
1165	Img-17-07-2021 00-11-30.jpg	Yogurt	876	435	478	196	-30.4463	0.904028	0.75849	Success	0.354988
1166	Img-17-07-2021 00-11-30.jpg	Pepper	422	516	366	156	-28.7115	0.786544	0.0623181	Success	0.306976
1167	Img-17-07-2021 00-11-35.jpg	Yogurt	971	552	478	196	89.9054	0.841289	0.477022	Success	0.34211
1168	Img-17-07-2021 00-11-35.jpg	Pepper	410	495	366	156	-7.35382	0.82619	2.33597	Success	0.313983
1169	Img-17-07-2021 00-11-39.jpg	Yogurt	919	324	478	196	-28.1645	0.770165	3.96621	Success	0.349861
1170	Img-17-07-2021 00-11-39.jpg	Pepper	305	507	366	156	-70.6597	0.887374	4.42538	Success	0.313008
1171	Img-28-08-2021 10-23-04.jpg	CokeBottle	0	0	576	202	0	0	63.0549	Fail	0.300003
1172	Img-28-08-2021 10-23-04.jpg	SmallMedicine	983	438	260	158	-42.5718	0.886101	5.96274	Success	0.302987
1173	Img-28-08-2021 10-23-13.jpg	CokeBottle	0	0	576	202	0	0	47.0388	Fail	0.340989
1174	Img-28-08-2021 10-23-13.jpg	SmallMedicine	1102	378	260	158	74.7858	0.587169	41.9901	Fail	0.312999
1175	Img-28-08-2021 10-23-16.jpg	CokeBottle	0	0	576	202	0	0	11.0883	Fail	0.31207
1176	Img-28-08-2021 10-23-16.jpg	SmallMedicine	1046	425	260	158	31.0582	0.912329	1.41739	Success	0.311063
1177	Img-28-08-2021 10-23-41.jpg	CokeBottle	0	0	576	202	0	0	39.0804	Fail	0.293004
1178	Img-28-08-2021 10-23-41.jpg	SmallMedicine	312	480	260	158	22.5309	0.802228	12.889	Success	0.306384
1179	Img-28-08-2021 10-23-52.jpg	CokeBottle	0	0	576	202	0	0	1.95457	Fail	0.312007
1180	Img-28-08-2021 10-23-52.jpg	SmallMedicine	362	591	260	158	-44.9994	0.833767	8.40149	Success	0.283074
1181	Img-28-08-2021 10-24-03.jpg	SmallMedicine	440	383	260	158	-50.1811	0.880387	5.55884	Success	0.311997
1182	Img-28-08-2021 10-24-03.jpg	T1	848	494	432	114	-42.8821	0.626132	7.77917	Success	0.295003
1183	Img-28-08-2021 10-24-09.jpg	SmallMedicine	851	498	260	158	1.98088	0.820167	10.6007	Success	0.287999
1184	Img-28-08-2021 10-24-09.jpg	T1	407	545	432	114	81.4591	0.369124	27.1628	Success	0.309006
1185	Img-28-08-2021 10-24-12.jpg	SmallMedicine	990	530	260	158	-68.1443	0.904966	4.28003	Success	0.286511
1186	Img-28-08-2021 10-24-12.jpg	T1	522	488	432	114	34.9336	0.347173	29.5031	Success	0.316
1187	Img-28-08-2021 10-24-31.jpg	SmallMedicine	887	615	260	158	59.73	0.82228	11.1978	Success	0.311858
1188	Img-28-08-2021 10-24-31.jpg	T1	359	319	432	114	-48.6554	0	0.552527	Fail	0.317007
1189	Img-28-08-2021 10-24-40.jpg	SmallMedicine	831	590	260	158	-69.7892	0.903905	0.649113	Success	0.28801
1190	Img-28-08-2021 10-24-40.jpg	T1	485	486	432	114	15.7874	0.373611	19.0689	Success	0.286999
1191	Img-28-08-2021 10-24-53.jpg	T1	453	450	432	114	3.2219	0.635387	13.6626	Success	0.293013
1192	Img-28-08-2021 10-24-53.jpg	RedMedicine	925	462	324	142	-61.3051	0.923901	0.922375	Success	0.304031
1193	Img-28-08-2021 10-24-58.jpg	T1	0	0	432	114	0	0	34.7183	Fail	0.299998
1194	Img-28-08-2021 10-24-58.jpg	RedMedicine	892	365	324	142	-85.3921	0.871972	3.61126	Success	0.326023
1195	Img-28-08-2021 10-25-14.jpg	T1	0	0	432	114	0	0	33.0525	Fail	0.306039
1196	Img-28-08-2021 10-25-14.jpg	RedMedicine	352	494	324	142	-3.14068	0.822322	5.51242	Success	0.324366
1197	Img-28-08-2021 10-25-19.jpg	T1	942	611	432	114	80.3673	0.257651	40.0944	Fail	0.292997
1198	Img-28-08-2021 10-25-19.jpg	RedMedicine	373	359	324	142	-54.6675	0.920502	0.939297	Success	0.331998
1199	Img-28-08-2021 10-25-26.jpg	T1	894	442	432	114	31.3917	0.254581	39.7718	Fail	0.300985
1200	Img-28-08-2021 10-25-26.jpg	RedMedicine	298	537	324	142	-43.1051	0.880551	1.35571	Success	0.313512
1201	02_img0.jpg	FruitKnife	1018	300	440	256	-84.9179	0.625123	7.95983	Success	0.337463
1202	02_img0.jpg	GreenSoap	268	278	396	274	50.9217	0.948736	0.933057	Success	0.333997
1203	02_img0.jpg	Pepper	573	566	366	156	54.2662	0.914043	2.41968	Success	0.378486
1204	02_img1.jpg	FruitKnife	904	571	440	256	72.1472	0.684068	10.169	Success	0.339865
1205	02_img1.jpg	GreenSoap	196	297	396	274	30.316	0.823977	1.04909	Success	0.399565
1206	02_img1.jpg	Pepper	439	616	366	156	75.8925	0.903598	1.91885	Success	0.405999
1207	02_img10.jpg	FruitKnife	410	643	440	256	65.9844	0.731226	8.49524	Success	0.395995
1208	02_img10.jpg	GreenSoap	498	227	396	274	-37.2911	0.842593	5.04464	Success	0.398004
1209	02_img10.jpg	Pepper	983	560	366	156	2.92767	0.621104	17.9276	Success	0.378086
1210	02_img100.jpg	Shampoo	315	306	448	170	-59.8966	0.889452	1.20558	Success	0.403962
1211	02_img100.jpg	PurpleMedicine	596	698	300	146	22.5512	0.825752	8.55797	Success	0.354008
1212	02_img100.jpg	DrillCover	1086	492	454	148	-37.6089	0.379644	19.6473	Success	0.351146
1213	02_img101.jpg	Shampoo	369	272	448	170	41.2125	0.93579	1.24833	Success	0.379
1214	02_img101.jpg	PurpleMedicine	583	676	300	146	-28.5898	0.667724	4.26387	Success	0.366528
1215	02_img101.jpg	DrillCover	848	308	454	148	20.8618	0.458675	4.45941	Success	0.379996
1216	02_img102.jpg	Shampoo	541	263	448	170	-43.711	0.924814	0.835727	Success	0.375997
1217	02_img102.jpg	PurpleMedicine	303	682	300	146	75.7102	0.707584	5.64682	Success	0.369001
1218	02_img102.jpg	DrillCover	968	647	454	148	-37.8397	0.916306	2.82334	Success	0.364495
1219	02_img103.jpg	Shampoo	615	330	448	170	-9.76497	0.951402	0.331748	Success	0.369016
1220	02_img103.jpg	PurpleMedicine	357	670	300	146	3.61573	0.679809	16.4169	Success	0.396524
1221	02_img103.jpg	DrillCover	941	804	454	148	-49.6398	0.199302	78.762	Fail	0.411
1222	02_img104.jpg	Shampoo	562	384	448	170	-50.2883	0.938627	0.415338	Success	0.344976
1223	02_img104.jpg	PurpleMedicine	351	668	300	146	-17.0602	0.680013	16.9709	Success	0.328037
1224	02_img104.jpg	DrillCover	1012	641	454	148	-48.1259	0.809534	5.39413	Success	0.311083
1225	02_img105.jpg	Shampoo	727	681	448	170	-43.0272	0.963778	0.0109477	Success	0.335059
1226	02_img105.jpg	PurpleMedicine	265	496	300	146	-47.883	0.875086	5.38907	Success	0.338999
1227	02_img105.jpg	DrillCover	488	1203	454	148	-32.0376	0	68.5315	Fail	0.328001
1228	02_img106.jpg	Shampoo	599	677	448	170	5.87769	0.914373	2.38353	Success	0.349994
1229	02_img106.jpg	PurpleMedicine	305	272	300	146	56.8136	0.763753	4.61723	Success	0.345032
1230	02_img106.jpg	DrillCover	0	0	454	148	0	0	26.3552	Fail	0.305053
1231	02_img107.jpg	Shampoo	934	690	448	170	28.5957	0.930671	2.05593	Success	0.342001
1232	02_img107.jpg	PurpleMedicine	755	245	300	146	-21.2287	0.742896	4.8304	Success	0.301018
1233	02_img107.jpg	DrillCover	291	617	454	148	-3.07729	0.812945	7.20427	Success	0.303032
1234	02_img108.jpg	Shampoo	934	596	448	170	61.2132	0.948739	1.14328	Success	0.335978
1235	02_img108.jpg	PurpleMedicine	557	274	300	146	-41.037	0.63539	4.54663	Success	0.328056
1236	02_img108.jpg	DrillCover	270	703	454	148	-68.9152	0.19592	32.9403	Fail	0.287039
1237	02_img109.jpg	Block	0	0	278	120	0	0	28.5468	Fail	0.301004
1238	02_img109.jpg	GreenSoap	618	724	396	274	-35.1851	0.932145	0.855445	Success	0.330054
1239	02_img109.jpg	LaptopClean	260	236	442	174	-44.345	0.869665	1.37341	Success	0.321977
1240	02_img11.jpg	FruitKnife	169	496	440	256	-6.4987	0.611818	17.6702	Success	0.327038
1241	02_img11.jpg	GreenSoap	966	262	396	274	74.7701	0.869722	2.08484	Success	0.336603
1242	02_img11.jpg	Pepper	784	660	366	156	-36.1311	0.912965	3.24821	Success	0.344001
1243	02_img110.jpg	Block	0	0	278	120	0	0	31.7947	Fail	0.278031
1244	02_img110.jpg	GreenSoap	606	692	396	274	9.65311	0.905705	0.991218	Success	0.329035
1245	02_img110.jpg	LaptopClean	267	261	442	174	2.11148	0.876722	3.32083	Success	0.318068
1246	02_img111.jpg	Block	755	94	278	120	-12.7925	0	9.43758	Fail	0.34105
1247	02_img111.jpg	GreenSoap	329	676	396	274	66.4135	0.919418	0.976261	Success	0.331024
1248	02_img111.jpg	LaptopClean	847	659	442	174	18.2356	0.844449	4.95663	Success	0.337059
1249	02_img112.jpg	Block	813	285	278	120	-18.245	0.119688	26.8714	Fail	0.281108
1250	02_img112.jpg	GreenSoap	294	622	396	274	-64.9706	0.90478	3.57983	Success	0.331256
1251	02_img112.jpg	LaptopClean	905	609	442	174	-20.4351	0.870596	0.330957	Success	0.348842
1252	02_img113.jpg	Block	0	0	278	120	0	0	11.4853	Fail	0.301111
1253	02_img113.jpg	GreenSoap	296	625	396	274	22.7261	0.922841	0.312548	Success	0.329027
1254	02_img113.jpg	LaptopClean	936	583	442	174	41.8282	0.844989	5.41267	Success	0.336037
1255	02_img114.jpg	Block	861	196	278	120	-32.6486	0.691211	13.0851	Success	0.318008
1256	02_img114.jpg	GreenSoap	306	589	396	274	66.6571	0.826088	0.310515	Success	0.380063
1257	02_img114.jpg	LaptopClean	968	615	442	174	2.98964	0.834551	7.39729	Success	0.348995
1258	02_img115.jpg	Block	0	0	278	120	0	0	56.7641	Fail	0.287972
1259	02_img115.jpg	GreenSoap	236	463	396	274	-66.9671	0.849611	2.61694	Success	0.340098
1260	02_img115.jpg	LaptopClean	936	678	442	174	-45.452	0.899818	3.34342	Success	0.341427
1261	02_img116.jpg	Block	0	0	278	120	0	0	7.38237	Fail	0.300182
1262	02_img116.jpg	GreenSoap	238	578	396	274	59.3001	0.824772	4.36446	Success	0.356949
1263	02_img116.jpg	LaptopClean	809	630	442	174	-30.5543	0.873796	4.34314	Success	0.330001
1264	02_img117.jpg	Block	0	0	278	120	0	0	58.2421	Fail	0.303995
1265	02_img117.jpg	GreenSoap	633	239	396	274	40.0784	0.965415	0.350625	Success	0.325202
1266	02_img117.jpg	LaptopClean	985	685	442	174	-16.8657	0.839861	2.21663	Success	0.362725
1267	02_img118.jpg	Block	381	859	278	120	-66.0993	0.0558283	3.23056	Fail	0.307999
1268	02_img118.jpg	GreenSoap	520	309	396	274	-16.0989	0.921162	2.38809	Success	0.335517
1269	02_img118.jpg	LaptopClean	979	591	442	174	68.8872	0.808627	6.39012	Success	0.328002
1270	02_img119.jpg	Block	0	0	278	120	0	0	16.8724	Fail	0.313975
1271	02_img119.jpg	GreenSoap	570	289	396	274	33.0799	0.954584	2.55063	Success	0.338045
1272	02_img119.jpg	LaptopClean	1043	674	442	174	-20.7599	0.910319	3.32601	Success	0.343017
1273	02_img12.jpg	FruitKnife	326	285	440	256	-7.04807	0.806486	7.04996	Success	0.346011
1274	02_img12.jpg	GreenSoap	885	269	396	274	32.6119	0.90882	4.61611	Success	0.344036
1275	02_img12.jpg	Pepper	603	676	366	156	-80.9317	0.894108	0.761691	Success	0.349024
1276	02_img120.jpg	Block	0	0	278	120	0	0	72.5799	Fail	0.380042
1277	02_img120.jpg	GreenSoap	596	289	396	274	71.2849	0.921144	2.09312	Success	0.441007
1278	02_img120.jpg	LaptopClean	969	652	442	174	52.0674	0.803147	8.62014	Success	0.422997
1279	02_img121.jpg	Block	0	0	278	120	0	0	55.4681	Fail	0.34104
1280	02_img121.jpg	GreenSoap	668	641	396	274	43.5117	0.934058	0.140857	Success	0.386995
1281	02_img121.jpg	LaptopClean	1012	331	442	174	-54.3388	0.813985	0.769576	Success	0.381001
1282	02_img122.jpg	Block	0	0	278	120	0	0	1.29683	Fail	0.303427
1283	02_img122.jpg	GreenSoap	655	731	396	274	-50.4862	0.909017	0.887548	Success	0.325027
1284	02_img122.jpg	LaptopClean	896	289	442	174	-2.44877	0.866599	4.38461	Success	0.334059
1285	02_img123.jpg	Block	0	0	278	120	0	0	44.9527	Fail	0.293003
1286	02_img123.jpg	GreenSoap	341	523	396	274	-16.2972	0.892179	4.30249	Success	0.376974
1287	02_img123.jpg	LaptopClean	938	680	442	174	-22.0455	0.9416	2.31006	Success	0.445004
1288	02_img124.jpg	Block	743	717	278	120	-70.1732	0.589614	4.57008	Success	0.429013
1289	02_img124.jpg	GreenSoap	966	320	396	274	-14.4119	0.961485	0.298322	Success	0.401038
1290	02_img124.jpg	LaptopClean	301	343	442	174	-17.3804	0.810042	0.1676	Success	0.468002
1291	02_img125.jpg	Block	0	0	278	120	0	0	7.38334	Fail	0.365021
1292	02_img125.jpg	GreenSoap	470	669	396	274	80.8796	0.95699	1.25312	Success	0.383013
1293	02_img125.jpg	LaptopClean	967	349	442	174	73.476	0.955499	1.44197	Success	0.382004
1294	02_img126.jpg	Block	0	0	278	120	0	0	55.6258	Fail	0.393
1295	02_img126.jpg	GreenSoap	296	229	396	274	-27.6879	0.85585	1.52154	Success	0.424013
1296	02_img126.jpg	LaptopClean	1010	454	442	174	-43.5577	0.936832	2.36564	Success	0.437004
1297	02_img127.jpg	Block	647	721	278	120	-72.7921	0.321701	62.0882	Fail	0.344372
1298	02_img127.jpg	GreenSoap	378	309	396	274	81.3736	0.897193	2.53264	Success	0.456569
1299	02_img127.jpg	LaptopClean	948	428	442	174	54.8645	0.829553	7.17137	Success	0.398028
1300	02_img128.jpg	Block	0	0	278	120	0	0	44.6659	Fail	0.356013
1301	02_img128.jpg	GreenSoap	339	317	396	274	-77.444	0.850549	1.36109	Success	0.345038
1302	02_img128.jpg	LaptopClean	1024	555	442	174	-31.9802	0.797622	4.60418	Success	0.356015
1303	02_img129.jpg	GreenSoap	304	566	396	274	-52.1188	0.939106	2.6044	Success	0.35507
1304	02_img129.jpg	Glue	843	651	488	230	41.8605	0.923743	2.46462	Success	0.394018
1305	02_img129.jpg	Pepper	797	223	366	156	-4.90007	0.935312	1.32029	Success	0.355385
1306	02_img13.jpg	Block	737	215	278	120	21.4812	0.701666	6.54943	Success	0.293066
1307	02_img13.jpg	PurpleMedicine	772	621	300	146	-52.509	0.887132	4.8982	Success	0.314974
1308	02_img13.jpg	SoftWash	263	519	390	264	62.434	0.930048	0.636031	Success	0.325991
1309	02_img130.jpg	GreenSoap	296	311	396	274	48.643	0.919054	1.52972	Success	0.346001
1310	02_img130.jpg	Glue	580	633	488	230	-85.4719	0.914395	1.78096	Success	0.384003
1311	02_img130.jpg	Pepper	970	325	366	156	-48.2781	0.883349	2.03498	Success	0.372019
1312	02_img131.jpg	GreenSoap	482	294	396	274	-16.7913	0.892695	1.36902	Success	0.435051
1313	02_img131.jpg	Glue	335	721	488	230	-19.7353	0.971456	1.29512	Success	0.397027
1314	02_img131.jpg	Pepper	1017	549	366	156	-70.0223	0.86491	5.44512	Success	0.371001
1315	02_img132.jpg	GreenSoap	680	696	396	274	-66.063	0.914171	4.50625	Success	0.360974
1316	02_img132.jpg	Glue	201	485	488	230	64.6087	0.896827	3.40794	Success	0.429039
1317	02_img132.jpg	Pepper	973	270	366	156	0.289167	0.923456	1.80498	Success	0.414997
1318	02_img133.jpg	GreenSoap	645	658	396	274	73.6227	0.899075	4.23389	Success	0.481509
1319	02_img133.jpg	Glue	272	280	488	230	61.4529	0.936054	2.81306	Success	0.436975
1320	02_img133.jpg	Pepper	1006	307	366	156	-8.49329	0.846997	2.20628	Success	0.42696
1321	02_img134.jpg	GreenSoap	628	648	396	274	-66.3713	0.948751	0.611889	Success	0.452529
1322	02_img134.jpg	Glue	224	298	488	230	-66.851	0.82345	2.96471	Success	0.439373
1323	02_img134.jpg	Pepper	985	309	366	156	-55.3183	0.82551	5.43919	Success	0.381972
1324	02_img135.jpg	GreenSoap	648	671	396	274	-39.4329	0.9681	0.199544	Success	0.355003
1325	02_img135.jpg	Glue	203	307	488	230	-19.023	0.741922	1.42835	Success	0.446518
1326	02_img135.jpg	Pepper	979	299	366	156	66.0654	0.95608	1.1527	Success	0.403073
1327	02_img136.jpg	GreenSoap	662	662	396	274	74.6803	0.9446	2.30242	Success	0.422047
1328	02_img136.jpg	Glue	285	358	488	230	86.5328	0.955481	1.83495	Success	0.439499
1329	02_img136.jpg	Pepper	1019	289	366	156	87.0808	0.870978	4.25181	Success	0.455384
1330	02_img137.jpg	GreenSoap	650	291	396	274	-35.0029	0.97594	1.0554	Success	0.391048
1331	02_img137.jpg	Glue	274	628	488	230	-11.7901	0.96036	0.223822	Success	0.382072
1332	02_img137.jpg	Pepper	980	695	366	156	-18.1696	0.751655	4.92882	Success	0.367213
1333	02_img138.jpg	GreenSoap	676	254	396	274	13.1576	0.937395	2.76662	Success	0.350008
1334	02_img138.jpg	Glue	257	637	488	230	60.1497	0.880646	0.0886688	Success	0.390038
1335	02_img138.jpg	Pepper	940	690	366	156	-24.2415	0.819802	3.90338	Success	0.341052
1336	02_img139.jpg	GreenSoap	717	304	396	274	-74.0993	0.883091	4.04462	Success	0.416981
1337	02_img139.jpg	Glue	299	608	488	230	-30.8792	0.916478	1.40921	Success	0.470566
1338	02_img139.jpg	Pepper	958	690	366	156	2.38954	0.861293	5.7838	Success	0.506382
1339	02_img14.jpg	Block	0	0	278	120	0	0	27.8365	Fail	0.420999
1340	02_img14.jpg	PurpleMedicine	438	722	300	146	-19.9458	0.861818	3.48517	Success	0.404003
1341	02_img14.jpg	SoftWash	348	345	390	264	26.2147	0.891744	5.03606	Success	0.391004
1342	02_img140.jpg	GreenSoap	651	692	396	274	61.5483	0.956099	2.3775	Success	0.421
1343	02_img140.jpg	Glue	236	335	488	230	28.199	0.7584	2.87776	Success	0.441055
1344	02_img140.jpg	Pepper	896	253	366	156	-12.6791	0.842784	2.42955	Success	0.371032
1345	02_img141.jpg	GreenSoap	290	700	396	274	21.2418	0.860987	2.38438	Success	0.371025
1346	02_img141.jpg	Glue	957	618	488	230	-89.203	0.921907	0.558322	Success	0.403003
1347	02_img141.jpg	Pepper	610	249	366	156	-88.7159	0.943043	1.30915	Success	0.370015
1348	02_img142.jpg	GreenSoap	212	618	396	274	84.6504	0.856139	1.3292	Success	0.354016
1349	02_img142.jpg	Glue	895	660	488	230	-30.7574	0.926119	0.940679	Success	0.385004
1350	02_img142.jpg	Pepper	652	235	366	156	73.9495	0.8805	4.97378	Success	0.352028
1351	02_img143.jpg	GreenSoap	304	341	396	274	65.3952	0.931663	1.89467	Success	0.37611
1352	02_img143.jpg	Glue	914	255	488	230	17.185	0.835714	0.956985	Success	0.405747
1353	02_img143.jpg	Pepper	719	699	366	156	9.05748	0.913856	2.34969	Success	0.417001
1354	02_img144.jpg	PaperKnife	-4534	-1155	532	146	-31.6847	0	0.705944	Fail	0.347058
1355	02_img144.jpg	GreenSoap	258	394	396	274	72.2616	0.901792	0.842733	Success	0.365573
1356	02_img144.jpg	Block	0	0	278	120	0	0	70.8581	Fail	0.294142
1357	02_img145.jpg	PaperKnife	888	662	532	146	19.8891	0.81426	0.598246	Success	0.348242
1358	02_img145.jpg	GreenSoap	613	259	396	274	57.6672	0.925389	2.8029	Success	0.339185
1359	02_img145.jpg	Block	0	0	278	120	0	0	29.0773	Fail	0.298029
1360	02_img146.jpg	PaperKnife	439	384	532	146	-57.4997	0.107453	6.27293	Fail	0.337205
1361	02_img146.jpg	GreenSoap	844	704	396	274	-70.4761	0.899361	3.59573	Success	0.332002
1362	02_img146.jpg	Block	0	0	278	120	0	0	69.7575	Fail	0.299603
1363	02_img147.jpg	PaperKnife	300	694	532	146	-16.4325	0.819849	5.30146	Success	0.346075
1364	02_img147.jpg	GreenSoap	500	319	396	274	65.0515	0.938529	0.513692	Success	0.322522
1365	02_img147.jpg	Block	922	569	278	120	28.5205	0.659606	1.99729	Success	0.29101
1366	02_img148.jpg	PaperKnife	213	539	532	146	83.0197	0.923235	2.178	Success	0.371425
1367	02_img148.jpg	GreenSoap	797	618	396	274	-67.6628	0.992387	0.16252	Success	0.334038
1368	02_img148.jpg	Block	0	0	278	120	0	0	9.69294	Fail	0.316511
1369	02_img149.jpg	PaperKnife	-1069	598	532	146	-45.507	0	53.5457	Fail	0.32382
1370	02_img149.jpg	GreenSoap	323	697	396	274	25.4276	0.859998	6.16176	Success	0.329794
1371	02_img149.jpg	Block	856	855	278	120	-44.4088	0	83.3583	Fail	0.301015
1372	02_img15.jpg	Block	615	629	278	120	-38.2583	0.276426	85.2771	Fail	0.306028
1373	02_img15.jpg	PurpleMedicine	245	489	300	146	74.3688	0.865259	6.05986	Success	0.348024
1374	02_img15.jpg	SoftWash	559	205	390	264	-23.7043	0.894826	5.74422	Success	0.315053
1375	02_img150.jpg	PaperKnife	747	308	532	146	-22.9095	0.180696	56.8896	Fail	0.323973
1376	02_img150.jpg	GreenSoap	269	585	396	274	67.9066	0.94497	2.98499	Success	0.342999
1377	02_img150.jpg	Block	0	0	278	120	0	0	22.442	Fail	0.32301
1378	02_img151.jpg	PaperKnife	333	345	532	146	-7.89385	0.804266	3.84818	Success	0.314
1379	02_img151.jpg	GreenSoap	930	572	396	274	-9.11105	0.900526	2.2511	Success	0.338062
1380	02_img151.jpg	Block	0	0	278	120	0	0	7.27666	Fail	0.314012
1381	02_img152.jpg	Xisat	795	619	526	144	59.4117	0.960835	0.657998	Success	0.375013
1382	02_img152.jpg	Shampoo	627	216	448	170	71.8265	0.852485	0.0273456	Success	0.363009
1383	02_img152.jpg	Glue	315	617	488	230	-75.005	0.896609	1.54884	Success	0.435
1384	02_img153.jpg	Xisat	665	677	526	144	30.7668	0.892078	0.323226	Success	0.321037
1385	02_img153.jpg	Shampoo	294	438	448	170	-86.6159	0.931762	0.178165	Success	0.343692
1386	02_img153.jpg	Glue	909	298	488	230	-52.5609	0.96335	1.13314	Success	0.370174
1387	02_img154.jpg	Xisat	358	689	526	144	16.0204	0.903215	0.285095	Success	0.358072
1388	02_img154.jpg	Shampoo	441	241	448	170	16.9321	0.873072	2.33263	Success	0.383003
1389	02_img154.jpg	Glue	992	537	488	230	85.836	0.935436	1.87976	Success	0.389024
1390	02_img155.jpg	Xisat	954	327	526	144	27.9621	0.866087	2.12084	Success	0.326887
1391	02_img155.jpg	Shampoo	409	179	448	170	-12.5346	0.955866	1.39293	Success	0.367
1392	02_img155.jpg	Glue	347	665	488	230	-16.392	0.945644	1.57886	Success	0.369042
1393	02_img156.jpg	Xisat	913	270	526	144	16.4174	0.815694	0.740472	Success	0.327198
1394	02_img156.jpg	Shampoo	337	290	448	170	-36.9921	0.957394	0.762872	Success	0.343343
1395	02_img156.jpg	Glue	725	755	488	230	-17.6474	0.963146	0.894484	Success	0.383526
1396	02_img157.jpg	Pepper	195	501	366	156	73.1181	0.900262	0.169512	Success	0.38252
1397	02_img157.jpg	RedMedicine	749	254	324	142	-15.6778	0.796199	1.25381	Success	0.372092
1398	02_img157.jpg	HandClean	626	650	392	214	33.8472	0.937103	2.99088	Success	0.46314
1399	02_img158.jpg	Pepper	290	249	366	156	-26.7299	0.938475	1.0248	Success	0.373096
1400	02_img158.jpg	RedMedicine	901	369	324	142	-21.8666	0.97012	0.417961	Success	0.361071
1401	02_img158.jpg	HandClean	564	667	392	214	63.9226	0.915511	4.19759	Success	0.45072
1402	02_img159.jpg	Pepper	146	588	366	156	-34.1878	0.679675	3.91079	Success	0.369565
1403	02_img159.jpg	RedMedicine	1030	286	324	142	38.0162	0.916464	1.85999	Success	0.412038
1404	02_img159.jpg	HandClean	591	623	392	214	-24.9241	0.946838	0.832134	Success	0.453316
1405	02_img16.jpg	Block	0	0	278	120	0	0	1.90084	Fail	0.285713
1406	02_img16.jpg	PurpleMedicine	384	323	300	146	-46.4132	0.846999	2.9134	Success	0.308596
1407	02_img16.jpg	SoftWash	889	321	390	264	5.13656	0.941992	2.97859	Success	0.331663
1408	02_img160.jpg	Pepper	432	663	366	156	14.5304	0.820648	4.94117	Success	0.378076
1409	02_img160.jpg	RedMedicine	970	501	324	142	-75.0447	0.941444	1.62613	Success	0.363178
1410	02_img160.jpg	HandClean	523	263	392	214	26.6411	0.943558	2.62608	Success	0.44457
1411	02_img161.jpg	Pepper	225	661	366	156	75.9816	0.911614	2.69406	Success	0.362048
1412	02_img161.jpg	RedMedicine	994	273	324	142	15.6088	0.810674	1.48444	Success	0.355027
1413	02_img161.jpg	HandClean	609	547	392	214	62.3104	0.932902	0.278698	Success	0.462098
1414	02_img162.jpg	Pepper	504	228	366	156	-87.9517	0.94009	1.34508	Success	0.375072
1415	02_img162.jpg	RedMedicine	535	701	324	142	73.6969	0.872867	3.60924	Success	0.360027
1416	02_img162.jpg	HandClean	950	394	392	214	51.4224	0.917213	3.0511	Success	0.444096
1417	02_img163.jpg	Pepper	183	518	366	156	-69.027	0.857707	1.71869	Success	0.354965
1418	02_img163.jpg	RedMedicine	612	702	324	142	-11.9503	0.82533	8.44392	Success	0.36461
1419	02_img163.jpg	HandClean	851	291	392	214	-41.0586	0.939497	1.52134	Success	0.425113
1420	02_img164.jpg	Pepper	320	650	366	156	75.8279	0.712893	2.95631	Success	0.374003
1421	02_img164.jpg	RedMedicine	893	613	324	142	-31.2031	0.91527	2.05127	Success	0.377063
1422	02_img164.jpg	HandClean	876	239	392	214	-26.992	0.8924	2.6028	Success	0.448302
1423	02_img165.jpg	Pepper	965	245	366	156	-50.3532	0.917597	0.869032	Success	0.359896
1424	02_img165.jpg	RedMedicine	716	688	324	142	-77.4946	0.961202	0.152531	Success	0.362025
1425	02_img165.jpg	HandClean	339	457	392	214	46.7029	0.950086	1.01795	Success	0.47413
1426	02_img166.jpg	Pepper	1001	330	366	156	-87.0705	0.639275	19.6419	Success	0.380021
1427	02_img166.jpg	RedMedicine	731	647	324	142	-22.8343	0.939517	2.32572	Success	0.368371
1428	02_img166.jpg	HandClean	273	410	392	214	45.5457	0.889772	0.960455	Success	0.443004
1429	02_img167.jpg	Pepper	219	327	366	156	-31.2755	0.7622	1.95223	Success	0.358575
1430	02_img167.jpg	RedMedicine	932	222	324	142	39.087	0.878443	0.993586	Success	0.360076
1431	02_img167.jpg	HandClean	661	609	392	214	-45.2595	0.943337	1.52193	Success	0.456987
1432	02_img168.jpg	Pepper	959	259	366	156	-15.9142	0.871873	2.95	Success	0.370062
1433	02_img168.jpg	RedMedicine	211	384	324	142	76.3474	0.666508	0.697781	Success	0.379438
1434	02_img168.jpg	HandClean	682	649	392	214	-74.1909	0.90834	3.0415	Success	0.427025
1435	02_img169.jpg	Pepper	620	679	366	156	-32.6923	0.951686	1.60726	Success	0.37208
1436	02_img169.jpg	RedMedicine	875	336	324	142	-61.0135	0.947881	2.09742	Success	0.352035
1437	02_img169.jpg	HandClean	174	408	392	214	-52.9845	0.822289	3.25929	Success	0.442098
1438	02_img17.jpg	Block	679	673	278	120	-48.8184	0.243011	88.0763	Fail	0.298521
1439	02_img17.jpg	PurpleMedicine	343	347	300	146	-33.6112	0.960384	1.85309	Success	0.300025
1440	02_img17.jpg	SoftWash	1039	582	390	264	67.8785	0.98372	0.375973	Success	0.322024
1441	02_img170.jpg	Pepper	481	673	366	156	-84.8895	0.911643	1.19079	Success	0.386056
1442	02_img170.jpg	RedMedicine	943	538	324	142	41.7328	0.833215	7.45771	Success	0.370061
1443	02_img170.jpg	HandClean	490	223	392	214	-22.369	0.837964	1.84432	Success	0.43906
1444	02_img171.jpg	Pepper	253	325	366	156	-73.0741	0.582809	3.88153	Success	0.354001
1445	02_img171.jpg	RedMedicine	748	687	324	142	86.652	0.845294	2.99819	Success	0.357057
1446	02_img171.jpg	HandClean	907	221	392	214	-51.6474	0.942824	2.5953	Success	0.462163
1447	02_img172.jpg	Pepper	387	239	366	156	37.5221	0.846367	1.79307	Success	0.363926
1448	02_img172.jpg	RedMedicine	394	646	324	142	0.528495	0.697874	17.4601	Success	0.374347
1449	02_img172.jpg	HandClean	904	398	392	214	-29.2213	0.894779	0.322647	Success	0.459085
1450	02_img173.jpg	Pepper	522	194	366	156	-51.6906	0.894991	4.13728	Success	0.365022
1451	02_img173.jpg	RedMedicine	470	639	324	142	-87.3786	0.945797	0.942601	Success	0.363041
1452	02_img173.jpg	HandClean	931	549	392	214	65.1617	0.930582	2.68339	Success	0.439066
1453	02_img174.jpg	Pepper	576	706	366	156	-80.6151	0.96286	0.0717374	Success	0.344009
1454	02_img174.jpg	RedMedicine	278	361	324	142	89.6271	0.927925	2.37706	Success	0.358027
1455	02_img174.jpg	HandClean	895	382	392	214	-80.1273	0.931223	2.43152	Success	0.444037
1456	02_img175.jpg	O2	515	238	438	184	1.29685	0.872553	2.41108	Success	0.331001
1457	02_img175.jpg	Glue	336	635	488	230	-1.14268	0.893838	1.97891	Success	0.386101
1458	02_img175.jpg	Pepper	901	544	366	156	-68.514	0.969249	0.788416	Success	0.346064
1459	02_img176.jpg	O2	633	255	438	184	59.1724	0.857308	4.67461	Success	0.375995
1460	02_img176.jpg	Glue	228	652	488	230	-84.9721	0.888884	1.43032	Success	0.36907
1461	02_img176.jpg	Pepper	831	693	366	156	-23.8081	0.804242	5.22587	Success	0.347038
1462	02_img177.jpg	O2	842	282	438	184	-68.8296	0.872238	4.68483	Success	0.352003
1463	02_img177.jpg	Glue	281	735	488	230	-32.0988	0.935374	2.07795	Success	0.383038
1464	02_img177.jpg	Pepper	354	247	366	156	-75.6209	0.698614	7.51366	Success	0.391985
1465	02_img178.jpg	O2	1005	269	438	184	40.2638	0.751866	10.5986	Success	0.383001
1466	02_img178.jpg	Glue	231	519	488	230	-60.9302	0.940476	2.12828	Success	0.409675
1467	02_img178.jpg	Pepper	726	574	366	156	-22.8589	0.96646	0.529913	Success	0.406232
1468	02_img179.jpg	O2	988	519	438	184	-62.0649	0.810471	6.54915	Success	0.37071
1469	02_img179.jpg	Glue	489	734	488	230	3.28992	0.881136	5.66535	Success	0.377053
1470	02_img179.jpg	Pepper	514	262	366	156	-77.185	0.825802	4.38312	Success	0.346056
1471	02_img18.jpg	Block	0	0	278	120	0	0	23.9439	Fail	0.306315
1472	02_img18.jpg	PurpleMedicine	231	591	300	146	82.8945	0.845438	8.03765	Success	0.33957
1473	02_img18.jpg	SoftWash	830	662	390	264	-16.2419	0.906106	4.06493	Success	0.348871
1474	02_img180.jpg	O2	940	513	438	184	-72.1187	0.947949	1.29244	Success	0.359062
1475	02_img180.jpg	Glue	476	677	488	230	-49.8995	0.912952	2.21622	Success	0.38802
1476	02_img180.jpg	Pepper	531	199	366	156	-76.5348	0.787931	6.23599	Success	0.343064
1477	02_img181.jpg	O2	941	642	438	184	-4.07912	0.684559	4.00079	Success	0.362021
1478	02_img181.jpg	Glue	356	550	488	230	-13.0945	0.93837	1.74662	Success	0.393056
1479	02_img181.jpg	Pepper	551	228	366	156	11.7176	0.84525	3.26387	Success	0.381486
1480	02_img182.jpg	O2	963	216	438	184	-8.23034	0.86107	2.54918	Success	0.359071
1481	02_img182.jpg	Glue	681	695	488	230	-4.0046	0.995526	0.0487861	Success	0.385999
1482	02_img182.jpg	Pepper	358	163	366	156	1.87984	0.862442	1.22766	Success	0.378573
1483	02_img183.jpg	O2	955	356	438	184	-85.718	0.909173	0.238055	Success	0.341003
1484	02_img183.jpg	Glue	567	669	488	230	-39.8897	0.946126	1.96882	Success	0.363067
1485	02_img183.jpg	Pepper	354	199	366	156	-6.98176	0.818237	1.74158	Success	0.356801
1486	02_img184.jpg	O2	665	557	438	184	-19.8909	0.698269	3.27121	Success	0.331045
1487	02_img184.jpg	Glue	171	590	488	230	70.3472	0.865259	0.0797702	Success	0.371063
1488	02_img184.jpg	Pepper	1016	356	366	156	-84.0884	0.919785	2.55132	Success	0.351024
1489	02_img185.jpg	O2	831	611	438	184	-26.8078	0.913161	1.69234	Success	0.356041
1490	02_img185.jpg	Glue	253	471	488	230	-62.4062	0.9469	1.85355	Success	0.412993
1491	02_img185.jpg	Pepper	656	203	366	156	-12.5626	0.931106	1.37327	Success	0.361282
1492	02_img186.jpg	PurpleMedicine	414	688	300	146	77.9284	0.736783	3.85123	Success	0.324749
1493	02_img186.jpg	PaperKnife	907	478	532	146	-48.6177	0.60342	11.7143	Success	0.340234
1494	02_img186.jpg	Block	0	0	278	120	0	0	36.2347	Fail	0.312094
1495	02_img187.jpg	PurpleMedicine	242	595	300	146	51.7834	0.322218	86.8783	Fail	0.36095
1496	02_img187.jpg	PaperKnife	875	572	532	146	47.9286	0.798893	5.33578	Success	0.355698
1497	02_img187.jpg	Block	668	256	278	120	-27.2774	0.0246684	43.5813	Fail	0.299032
1498	02_img188.jpg	PurpleMedicine	540	179	300	146	-20.8171	0.62312	0.0479766	Success	0.340087
1499	02_img188.jpg	PaperKnife	921	541	532	146	59.5951	0.813161	5.94297	Success	0.347067
1500	02_img188.jpg	Block	456	571	278	120	-75.7674	0.672687	9.17264	Success	0.291314
1501	02_img189.jpg	PurpleMedicine	516	250	300	146	-42.8642	0.798323	5.53267	Success	0.326001
1502	02_img189.jpg	PaperKnife	928	560	532	146	58.9954	0.65539	13.351	Success	0.331591
1503	02_img189.jpg	Block	0	0	278	120	0	0	48.5732	Fail	0.331057
1504	02_img19.jpg	Block	422	911	278	120	-64.9841	0.000920613	34.8588	Fail	0.317017
1505	02_img19.jpg	PurpleMedicine	726	644	300	146	-43.7915	0.87966	1.95796	Success	0.35306
1506	02_img19.jpg	SoftWash	736	511	390	264	-31.4188	0.0929561	24.4012	Fail	0.326058
1507	02_img190.jpg	PurpleMedicine	275	256	300	146	8.48861	0.685446	14.0896	Success	0.340019
1508	02_img190.jpg	PaperKnife	639	610	532	146	-68.7248	0.776463	7.716	Success	0.342061
1509	02_img190.jpg	Block	3007	-2403	278	120	-27.1963	0	79.2225	Fail	0.29259
1510	02_img191.jpg	PaperKnife	906	411	532	146	73.7215	0.79706	5.78651	Success	0.340029
1511	02_img191.jpg	SmallMedicine	242	274	260	158	-68.5494	0.870376	4.42415	Success	0.31412
1512	02_img191.jpg	FruitKnife	400	645	440	256	39.2214	0.66679	10.9256	Success	0.311794
1513	02_img192.jpg	Pepper	783	704	366	156	-5.90868	0.79866	6.03205	Success	0.342003
1514	02_img192.jpg	Block	0	0	278	120	0	0	60.3519	Fail	0.308998
1515	02_img192.jpg	T1	408	387	432	114	-38.9343	0.242464	16.4851	Fail	0.307058
1516	02_img193.jpg	Pepper	780	664	366	156	83.1697	0.956645	0.787756	Success	0.334976
1517	02_img193.jpg	Block	977	116	278	120	0.591162	0.086683	31.1127	Fail	0.300057
1518	02_img193.jpg	T1	0	0	432	114	0	0	81.6356	Fail	0.316008
1519	02_img194.jpg	Pepper	363	308	366	156	-58.4115	0.862607	0.49943	Success	0.353999
1520	02_img194.jpg	Block	859	130	278	120	-7.20747	0.00445811	31.64	Fail	0.307078
1521	02_img194.jpg	T1	761	687	432	114	-10.4802	0.709724	9.29188	Success	0.32602
1522	02_img195.jpg	Pepper	571	667	366	156	-77.8278	0.765716	8.86961	Success	0.348061
1523	02_img195.jpg	Block	0	0	278	120	0	0	65.3058	Fail	0.314059
1524	02_img195.jpg	T1	762	303	432	114	-21.3457	0.0890217	4.33003	Fail	0.308025
1525	02_img196.jpg	Pepper	564	633	366	156	-56.6112	0.782163	6.16626	Success	0.329048
1526	02_img196.jpg	Block	0	0	278	120	0	0	75.6663	Fail	0.292752
1527	02_img196.jpg	T1	921	269	432	114	-6.85947	0.166108	67.861	Fail	0.322057
1528	02_img197.jpg	Pepper	910	319	366	156	-71.6703	0.874261	5.68699	Success	0.319
1529	02_img197.jpg	Block	0	0	278	120	0	0	13.3577	Fail	0.295586
1530	02_img197.jpg	T1	1424	2215	432	114	-50.1054	0	1.67629	Fail	0.330025
1531	02_img198.jpg	Pepper	365	355	366	156	-77.6992	0.83488	0.0602558	Success	0.348841
1532	02_img198.jpg	Block	902	348	278	120	-23.7206	0.209316	88.6704	Fail	0.28695
1533	02_img198.jpg	T1	762	640	432	114	-50.7009	0.520611	5.32964	Success	0.331038
1534	02_img199.jpg	Pepper	319	367	366	156	-66.673	0.830038	0.666159	Success	0.317041
1535	02_img199.jpg	Block	799	619	278	120	36.95	0	84.1931	Fail	0.300021
1536	02_img199.jpg	T1	667	651	432	114	-30.8937	0.640269	9.21454	Success	0.319589
1537	02_img2.jpg	FruitKnife	526	634	440	256	29.7172	0.814744	9.70619	Success	0.322326
1538	02_img2.jpg	GreenSoap	1015	463	396	274	26.4049	0.834716	1.38971	Success	0.318034
1539	02_img2.jpg	Pepper	344	253	366	156	-6.3437	0.781328	0.329594	Success	0.320534
1540	02_img20.jpg	Block	0	0	278	120	0	0	4.51319	Fail	0.301029
1541	02_img20.jpg	PurpleMedicine	904	581	300	146	-82.6713	0.853722	6.72063	Success	0.322901
1542	02_img20.jpg	SoftWash	273	644	390	264	22.2574	0.938922	0.105358	Success	0.311488
1543	02_img21.jpg	Block	0	0	278	120	0	0	36.6822	Fail	0.290486
1544	02_img21.jpg	PurpleMedicine	404	514	300	146	76.4164	0.83165	9.19358	Success	0.324091
1545	02_img21.jpg	SoftWash	926	315	390	264	-27.3395	0.938612	3.47158	Success	0.376998
1546	02_img22.jpg	Block	0	0	278	120	0	0	28.0072	Fail	0.337009
1547	02_img22.jpg	PurpleMedicine	450	360	300	146	-77.3082	0.707501	3.19363	Success	0.367389
1548	02_img22.jpg	SoftWash	943	650	390	264	16.2876	0.903726	4.69346	Success	0.427582
1549	02_img23.jpg	Block	633	735	278	120	65.4764	0.846876	3.84163	Success	0.330997
1550	02_img23.jpg	PurpleMedicine	932	430	300	146	-19.7114	0.929785	1.83467	Success	0.397065
1551	02_img23.jpg	SoftWash	419	358	390	264	-70.7908	0.898356	5.1583	Success	0.364999
1552	02_img24.jpg	Block	0	0	278	120	0	0	56.1849	Fail	0.309032
1553	02_img24.jpg	PurpleMedicine	458	653	300	146	-42.3905	0.857668	5.58294	Success	0.334692
1554	02_img24.jpg	SoftWash	922	480	390	264	-39.1968	0.925172	3.7749	Success	0.325026
1555	02_img25.jpg	Block	390	482	278	120	56.409	0.585082	25.0645	Success	0.311295
1556	02_img25.jpg	PurpleMedicine	908	348	300	146	-27.4635	0.933121	2.34613	Success	0.324367
1557	02_img25.jpg	SoftWash	891	724	390	264	-22.8304	0.938957	3.34722	Success	0.309034
1558	02_img26.jpg	Block	0	0	278	120	0	0	7.94542	Fail	0.286017
1559	02_img26.jpg	PurpleMedicine	1119	536	300	146	77.4903	0.884985	4.74739	Success	0.310061
1560	02_img26.jpg	SoftWash	674	632	390	264	65.5039	0.896623	6.18697	Success	0.316006
1561	02_img27.jpg	Block	0	0	278	120	0	0	55.2647	Fail	0.305927
1562	02_img27.jpg	PurpleMedicine	1011	690	300	146	-7.61554	0.912124	4.20008	Success	0.329024
1563	02_img27.jpg	SoftWash	379	658	390	264	-6.25565	0.950313	1.88055	Success	0.340023
1564	02_img28.jpg	Block	0	0	278	120	0	0	57.6494	Fail	0.300097
1565	02_img28.jpg	PurpleMedicine	617	697	300	146	48.4867	0.8308	8.98544	Success	0.338021
1566	02_img28.jpg	SoftWash	267	435	390	264	81.0265	0.86599	7.32685	Success	0.315059
1567	02_img29.jpg	Block	0	0	278	120	0	0	54.712	Fail	0.292058
1568	02_img29.jpg	PurpleMedicine	256	633	300	146	56.2059	0.712556	18.3922	Success	0.328026
1569	02_img29.jpg	SoftWash	860	582	390	264	70.8611	0.949631	2.76108	Success	0.30929
1570	02_img3.jpg	FruitKnife	402	658	440	256	-51.1232	0.805237	6.39393	Success	0.319978
1571	02_img3.jpg	GreenSoap	902	590	396	274	-79.157	0.912175	1.93977	Success	0.346163
1572	02_img3.jpg	Pepper	520	216	366	156	-78.3118	0.850197	1.79107	Success	0.314023
1573	02_img30.jpg	Block	0	0	278	120	0	0	3.50398	Fail	0.288999
1574	02_img30.jpg	PurpleMedicine	190	689	300	146	-8.98378	0.64298	23.9616	Success	0.316136
1575	02_img30.jpg	SoftWash	730	608	390	264	-7.10272	0.940728	3.39426	Success	0.331035
1576	02_img31.jpg	Block	-361	741	278	120	79.7	0	69.163	Fail	0.305866
1577	02_img31.jpg	PurpleMedicine	461	356	300	146	-29.5965	0.916382	2.86959	Success	0.330036
1578	02_img31.jpg	SoftWash	935	502	390	264	9.68664	0.925198	4.35947	Success	0.323196
1579	02_img32.jpg	Block	0	0	278	120	0	0	9.8603	Fail	0.28303
1580	02_img32.jpg	PurpleMedicine	887	296	300	146	-24.5179	0.916411	3.81701	Success	0.310048
1581	02_img32.jpg	SoftWash	906	684	390	264	-8.48087	0.929515	4.12088	Success	0.315996
1582	02_img33.jpg	Block	505	664	278	120	-86.1625	0.33191	58.8604	Fail	0.285002
1583	02_img33.jpg	PurpleMedicine	1069	693	300	146	-11.7369	0.847192	6.91768	Success	0.305062
1584	02_img33.jpg	SoftWash	885	318	390	264	-41.1254	0.947182	2.71862	Success	0.337058
1585	02_img34.jpg	Block	0	0	278	120	0	0	15.2506	Fail	0.290119
1586	02_img34.jpg	PurpleMedicine	803	596	300	146	-72.1023	0.860931	6.63864	Success	0.322022
1587	02_img34.jpg	SoftWash	378	329	390	264	24.6922	0.945376	2.70878	Success	0.337444
1588	02_img35.jpg	Block	0	0	278	120	0	0	7.45428	Fail	0.282034
1589	02_img35.jpg	PurpleMedicine	842	308	300	146	89.3241	0.780664	10.6938	Success	0.321569
1590	02_img35.jpg	SoftWash	1005	696	390	264	21.5888	0.904286	5.65656	Success	0.311033
1591	02_img36.jpg	Block	771	246	278	120	-14.3032	0.8479	1.55867	Success	0.287009
1592	02_img36.jpg	PurpleMedicine	326	474	300	146	-59.5242	0.858596	0.796471	Success	0.316016
1593	02_img36.jpg	SoftWash	806	706	390	264	-3.55857	0.920633	3.2068	Success	0.366995
1594	02_img37.jpg	Block	0	0	278	120	0	0	18.7465	Fail	0.301506
1595	02_img37.jpg	PurpleMedicine	481	317	300	146	82.6507	0.84005	8.02791	Success	0.31551
1596	02_img37.jpg	SoftWash	379	705	390	264	37.8265	0.917569	4.81992	Success	0.309579
1597	02_img38.jpg	Block	925	685	278	120	70.9639	0.903379	2.95863	Success	0.289996
1598	02_img38.jpg	PurpleMedicine	707	297	300	146	-48.5195	0.707346	10.5747	Success	0.329026
1599	02_img38.jpg	SoftWash	320	571	390	264	-82.0532	0.932675	3.05714	Success	0.315026
1600	02_img39.jpg	Block	216	575	278	120	-56.0411	0.22404	78.5587	Fail	0.293352
1601	02_img39.jpg	PurpleMedicine	737	369	300	146	20.4746	0.879929	1.51281	Success	0.35905
1602	02_img39.jpg	SoftWash	950	651	390	264	-20.0555	0.895452	1.86431	Success	0.328023
1603	02_img4.jpg	FruitKnife	290	433	440	256	-32.2788	0.897164	5.57776	Success	0.319068
1604	02_img4.jpg	GreenSoap	969	271	396	274	-24.8024	0.928139	0.281525	Success	0.339028
1605	02_img4.jpg	Pepper	808	677	366	156	-65.895	0.92451	1.3123	Success	0.337304
1606	02_img40.jpg	Block	0	0	278	120	0	0	58.881	Fail	0.299062
1607	02_img40.jpg	PurpleMedicine	824	291	300	146	11.8513	0.89427	4.5073	Success	0.306002
1608	02_img40.jpg	SoftWash	323	546	390	264	-64.5576	0.312244	45.5837	Fail	0.325975
1609	02_img41.jpg	Block	0	0	278	120	0	0	31.4919	Fail	0.300031
1610	02_img41.jpg	PurpleMedicine	1033	568	300	146	-14.392	0.83858	2.65957	Success	0.301035
1611	02_img41.jpg	SoftWash	547	342	390	264	-23.6019	0.932872	3.64049	Success	0.338954
1612	02_img42.jpg	Block	0	0	278	120	0	0	49.1557	Fail	0.298143
1613	02_img42.jpg	PurpleMedicine	327	708	300	146	-62.9998	0.870264	6.19976	Success	0.307036
1614	02_img42.jpg	SoftWash	974	648	390	264	82.4142	0.740452	20.7149	Success	0.334002
1615	02_img43.jpg	Block	0	0	278	120	0	0	77.4026	Fail	0.300022
1616	02_img43.jpg	PurpleMedicine	595	697	300	146	-63.0593	0.911467	4.13997	Success	0.321036
1617	02_img43.jpg	SoftWash	886	373	390	264	-0.274151	0.944752	3.07404	Success	0.337059
1618	02_img44.jpg	Block	265	445	278	120	-52.9708	0.902759	0.76162	Success	0.28403
1619	02_img44.jpg	PurpleMedicine	1011	763	300	146	-9.41724	0.873219	4.2935	Success	0.327058
1620	02_img44.jpg	SoftWash	681	462	390	264	74.4913	0.925037	3.39752	Success	0.324013
1621	02_img45.jpg	Block	0	0	278	120	0	0	47.3202	Fail	0.282053
1622	02_img45.jpg	PurpleMedicine	714	664	300	146	-37.234	0.895318	3.05595	Success	0.322027
1623	02_img45.jpg	SoftWash	884	353	390	264	11.8183	0.901489	5.0571	Success	0.323618
1624	02_img46.jpg	Block	0	0	278	120	0	0	19.2325	Fail	0.304571
1625	02_img46.jpg	PurpleMedicine	357	737	300	146	60.7627	0.799292	11.1929	Success	0.328493
1626	02_img46.jpg	SoftWash	949	579	390	264	63.8543	0.953788	1.71164	Success	0.303031
1627	02_img47.jpg	Block	0	0	278	120	0	0	53.4823	Fail	0.30776
1628	02_img47.jpg	PurpleMedicine	327	556	300	146	-44.8699	0.809391	6.70443	Success	0.314403
1629	02_img47.jpg	SoftWash	894	687	390	264	-8.468	0.914856	1.18376	Success	0.329067
1630	02_img48.jpg	Block	0	0	278	120	0	0	78.0528	Fail	0.286974
1631	02_img48.jpg	PurpleMedicine	452	451	300	146	0.669483	0.807486	10.565	Success	0.331053
1632	02_img48.jpg	SoftWash	966	665	390	264	-62.3992	0.818607	9.78733	Success	0.340058
1633	02_img49.jpg	Block	0	0	278	120	0	0	61.5446	Fail	0.306006
1634	02_img49.jpg	PurpleMedicine	788	686	300	146	-67.8742	0.833638	7.73479	Success	0.304573
1635	02_img49.jpg	SoftWash	301	451	390	264	27.901	0.85279	8.92946	Success	0.340085
1636	02_img5.jpg	FruitKnife	579	179	440	256	-82.0476	0.714397	0.326517	Success	0.327547
1637	02_img5.jpg	GreenSoap	994	572	396	274	68.9616	0.891488	4.22424	Success	0.341
1638	02_img5.jpg	Pepper	410	613	366	156	-34.0849	0.925064	2.11068	Success	0.350006
1639	02_img50.jpg	Block	0	0	278	120	0	0	1.20027	Fail	0.305894
1640	02_img50.jpg	PurpleMedicine	624	284	300	146	-5.79608	0.918922	2.88675	Success	0.314787
1641	02_img50.jpg	SoftWash	781	725	390	264	-19.3303	0.919085	4.5907	Success	0.340039
1642	02_img51.jpg	Block	0	0	278	120	0	0	85.6281	Fail	0.305141
1643	02_img51.jpg	PurpleMedicine	576	409	300	146	74.3691	0.834831	8.70585	Success	0.309026
1644	02_img51.jpg	SoftWash	989	550	390	264	24.5487	0.904445	5.60514	Success	0.329036
1645	02_img52.jpg	Block	0	0	278	120	0	0	30.6815	Fail	0.299123
1646	02_img52.jpg	PurpleMedicine	425	348	300	146	4.97795	0.847158	7.24775	Success	0.31991
1647	02_img52.jpg	SoftWash	826	612	390	264	83.6994	0.957912	2.2632	Success	0.317478
1648	02_img53.jpg	Block	0	0	278	120	0	0	53.9694	Fail	0.301998
1649	02_img53.jpg	PurpleMedicine	1021	415	300	146	-13.5282	0.881795	2.94351	Success	0.348171
1650	02_img53.jpg	SoftWash	587	650	390	264	-86.9693	0.922201	3.65242	Success	0.315026
1651	02_img54.jpg	Block	0	0	278	120	0	0	49.6097	Fail	0.292701
1652	02_img54.jpg	PurpleMedicine	677	646	300	146	-54.5864	0.934058	3.01509	Success	0.330858
1653	02_img54.jpg	SoftWash	821	326	390	264	51.3229	0.927923	2.65243	Success	0.341059
1654	02_img55.jpg	Block	0	0	278	120	0	0	4.513	Fail	0.285019
1655	02_img55.jpg	PurpleMedicine	366	718	300	146	23.5182	0.687454	21.0079	Success	0.325053
1656	02_img55.jpg	SoftWash	941	631	390	264	80.6748	0.905157	3.2697	Success	0.30606
1657	02_img56.jpg	Block	609	683	278	120	67.6631	0.75722	8.88147	Success	0.302998
1658	02_img56.jpg	PurpleMedicine	228	484	300	146	25.5503	0.86624	7.00488	Success	0.327451
1659	02_img56.jpg	SoftWash	929	360	390	264	75.133	0.884766	6.07297	Success	0.337999
1660	02_img57.jpg	Block	-2881	16622	278	120	-76.8278	0	3.55349	Fail	0.302722
1661	02_img57.jpg	PurpleMedicine	370	347	300	146	72.98	0.853046	5.91101	Success	0.303944
1662	02_img57.jpg	SoftWash	753	636	390	264	14.5977	0.927045	3.43435	Success	0.339064
1663	02_img58.jpg	Block	0	0	278	120	0	0	75.565	Fail	0.312639
1664	02_img58.jpg	PurpleMedicine	555	343	300	146	-64.5573	0.905357	3.89614	Success	0.317969
1665	02_img58.jpg	SoftWash	410	686	390	264	-3.72369	0.911229	3.86995	Success	0.331681
1666	02_img59.jpg	Block	127	420	278	120	-36.473	0	4.62398	Fail	0.295031
1667	02_img59.jpg	PurpleMedicine	991	349	300	146	21.6133	0.878019	5.14442	Success	0.317023
1668	02_img59.jpg	SoftWash	454	414	390	264	29.7596	0.897752	5.70666	Success	0.31907
1669	02_img6.jpg	FruitKnife	783	662	440	256	-57.4053	0.864107	5.38576	Success	0.319045
1670	02_img6.jpg	GreenSoap	985	271	396	274	19.2661	0.89096	3.70818	Success	0.335018
1671	02_img6.jpg	Pepper	180	591	366	156	-7.67313	0.558363	20.2497	Success	0.33815
1672	02_img60.jpg	Block	546	751	278	120	-30.3718	0.943151	1.59569	Success	0.282051
1673	02_img60.jpg	PurpleMedicine	1007	628	300	146	5.71432	0.840544	5.24147	Success	0.333965
1674	02_img60.jpg	SoftWash	599	314	390	264	67.6678	0.904289	2.3348	Success	0.334999
1675	02_img61.jpg	Block	0	0	278	120	0	0	14.4587	Fail	0.27562
1676	02_img61.jpg	PurpleMedicine	726	653	300	146	73.3736	0.937113	2.84759	Success	0.311064
1677	02_img61.jpg	SoftWash	369	389	390	264	13.8729	0.913049	4.26833	Success	0.335974
1678	02_img62.jpg	Block	0	0	278	120	0	0	68.6687	Fail	0.298057
1679	02_img62.jpg	PurpleMedicine	394	460	300	146	13.0245	0.953946	1.56448	Success	0.334172
1680	02_img62.jpg	SoftWash	743	726	390	264	5.55779	0.92814	3.7154	Success	0.328049
1681	02_img63.jpg	Block	952	700	278	120	15.785	0.849252	6.48392	Success	0.300501
1682	02_img63.jpg	PurpleMedicine	678	261	300	146	-5.84308	0.908885	4.22516	Success	0.334999
1683	02_img63.jpg	SoftWash	389	586	390	264	-13.495	0.928123	4.17985	Success	0.344
1684	02_img64.jpg	Glue	707	328	488	230	53.6788	0.98129	0.419177	Success	0.388028
1685	02_img64.jpg	Pepper	292	574	366	156	-47.7214	0.957271	1.79824	Success	0.341033
1686	02_img64.jpg	PurpleMedicine	960	677	300	146	-74.3795	0.820697	9.99404	Success	0.347092
1687	02_img65.jpg	Glue	699	629	488	230	-36.6385	0.967723	1.29827	Success	0.400042
1688	02_img65.jpg	Pepper	279	378	366	156	21.7672	0.951803	0.794764	Success	0.342004
1689	02_img65.jpg	PurpleMedicine	957	272	300	146	86.2035	0.887111	5.03925	Success	0.348029
1690	02_img66.jpg	Glue	654	286	488	230	-79.0533	0.984771	0.609012	Success	0.372683
1691	02_img66.jpg	Pepper	1041	628	366	156	89.7371	0.82064	8.03309	Success	0.339332
1692	02_img66.jpg	PurpleMedicine	312	674	300	146	-80.2532	0.967195	0.421015	Success	0.324207
1693	02_img67.jpg	Glue	724	281	488	230	14.1693	0.916993	1.81866	Success	0.375976
1694	02_img67.jpg	Pepper	948	685	366	156	-22.2355	0.933467	1.34716	Success	0.33305
1695	02_img67.jpg	PurpleMedicine	269	663	300	146	58.0288	0.842987	6.74761	Success	0.359509
1696	02_img68.jpg	Glue	602	340	488	230	-33.6852	0.944555	2.01383	Success	0.375039
1697	02_img68.jpg	Pepper	969	680	366	156	44.819	0.879543	2.93623	Success	0.341013
1698	02_img68.jpg	PurpleMedicine	325	620	300	146	-23.0974	0.807515	7.64686	Success	0.328023
1699	02_img69.jpg	Glue	250	308	488	230	-7.98831	0.911431	1.79706	Success	0.367311
1700	02_img69.jpg	Pepper	740	706	366	156	-39.4391	0.94635	1.60911	Success	0.349329
1701	02_img69.jpg	PurpleMedicine	932	281	300	146	-16.1555	0.650276	2.56466	Success	0.349356
1702	02_img7.jpg	FruitKnife	750	691	440	256	-2.30849	0.686737	22.0787	Success	0.32192
1703	02_img7.jpg	GreenSoap	833	269	396	274	-26.0058	0.929562	1.49707	Success	0.353041
1704	02_img7.jpg	Pepper	223	353	366	156	78.0743	0.774739	1.83795	Success	0.329001
1705	02_img70.jpg	Glue	942	628	488	230	-48.9398	0.928096	2.73114	Success	0.386038
1706	02_img70.jpg	Pepper	373	606	366	156	13.1949	0.875985	2.99266	Success	0.336
1707	02_img70.jpg	PurpleMedicine	665	196	300	146	-18.0232	0.835903	2.58212	Success	0.346029
1708	02_img71.jpg	Glue	971	539	488	230	45.6161	0.964796	0.896886	Success	0.377044
1709	02_img71.jpg	Pepper	340	618	366	156	-28.1953	0.884671	4.12875	Success	0.349026
1710	02_img71.jpg	PurpleMedicine	569	251	300	146	53.8717	0.890169	4.54244	Success	0.35504
1711	02_img72.jpg	Glue	632	640	488	230	-80.6574	0.950113	1.00404	Success	0.37806
1712	02_img72.jpg	Pepper	167	488	366	156	68.6467	0.825474	3.66137	Success	0.342034
1713	02_img72.jpg	PurpleMedicine	1042	453	300	146	-79.9123	0.916436	3.14335	Success	0.34937
1714	02_img73.jpg	Glue	885	250	488	230	-2.04158	0.943712	0.401627	Success	0.375025
1715	02_img73.jpg	Pepper	385	475	366	156	88.7224	0.904361	3.98577	Success	0.339043
1716	02_img73.jpg	PurpleMedicine	960	728	300	146	42.7253	0.761168	14.3795	Success	0.317942
1717	02_img74.jpg	Glue	1034	270	488	230	83.9225	0.944103	1.36	Success	0.384047
1718	02_img74.jpg	Pepper	369	417	366	156	29.8991	0.938497	0.381021	Success	0.337029
1719	02_img74.jpg	PurpleMedicine	734	701	300	146	-23.0417	0.918946	2.0917	Success	0.34005
1720	02_img75.jpg	Glue	729	680	488	230	-1.09961	0.979381	0.879676	Success	0.355005
1721	02_img75.jpg	Pepper	888	288	366	156	-4.72134	0.938645	0.294846	Success	0.357027
1722	02_img75.jpg	PurpleMedicine	284	412	300	146	79.7143	0.757048	1.86972	Success	0.342026
1723	02_img76.jpg	Glue	302	562	488	230	49.036	0.946085	1.54547	Success	0.399497
1724	02_img76.jpg	Pepper	983	236	366	156	-32.1814	0.910187	0.422651	Success	0.353004
1725	02_img76.jpg	PurpleMedicine	930	661	300	146	-55.8508	0.884088	3.5961	Success	0.349567
1726	02_img77.jpg	Glue	270	432	488	230	-85.8109	0.928075	1.72538	Success	0.370002
1727	02_img77.jpg	Pepper	1003	331	366	156	-49.6479	0.969431	0.614318	Success	0.360481
1728	02_img77.jpg	PurpleMedicine	723	708	300	146	-26.4447	0.878177	2.51696	Success	0.330096
1729	02_img78.jpg	Glue	407	228	488	230	-3.39091	0.936569	0.146078	Success	0.370572
1730	02_img78.jpg	Pepper	886	530	366	156	22.6495	0.777204	10.3276	Success	0.364102
1731	02_img78.jpg	PurpleMedicine	409	708	300	146	-35.2073	0.832839	7.20351	Success	0.361038
1732	02_img79.jpg	Glue	955	399	488	230	67.757	0.914112	3.62228	Success	0.328352
1733	02_img79.jpg	O2	549	670	438	184	1.23945	0.848581	7.05681	Success	0.324034
1734	02_img79.jpg	Block	0	0	278	120	0	0	66.6925	Fail	0.287594
1735	02_img8.jpg	FruitKnife	922	320	440	256	-12.5783	0.870015	2.90536	Success	0.327228
1736	02_img8.jpg	GreenSoap	611	695	396	274	-40.3017	0.937111	2.97233	Success	0.324056
1737	02_img8.jpg	Pepper	267	223	366	156	-35.9005	0.904028	2.74421	Success	0.315092
1738	02_img80.jpg	Glue	1036	474	488	230	-78.6419	0.943514	1.41672	Success	0.357063
1739	02_img80.jpg	O2	529	687	438	184	-40.3017	0.872921	4.79899	Success	0.319587
1740	02_img80.jpg	Block	682	-310	278	120	49.0105	0	14.2411	Fail	0.304024
1741	02_img81.jpg	Glue	923	663	488	230	-35.8899	0.969325	1.25346	Success	0.340031
1742	02_img81.jpg	O2	297	610	438	184	68.9056	0.913812	0.29131	Success	0.335001
1743	02_img81.jpg	Block	0	0	278	120	0	0	77.5689	Fail	0.282093
1744	02_img82.jpg	Glue	394	268	488	230	10.3535	0.866113	4.57804	Success	0.340294
1745	02_img82.jpg	O2	548	632	438	184	-3.01536	0.863781	4.73774	Success	0.350632
1746	02_img82.jpg	Block	0	0	278	120	0	0	79.8287	Fail	0.309036
1747	02_img83.jpg	SmallMedicine	550	637	260	158	30.1158	0.919959	3.34421	Success	0.354002
1748	02_img83.jpg	LaptopClean	1002	399	442	174	57.2151	0.953951	0.227849	Success	0.318115
1749	02_img83.jpg	T1	0	0	432	114	0	0	19.4031	Fail	0.314021
1750	02_img84.jpg	SmallMedicine	291	371	260	158	-56.2482	0.759474	3.25771	Success	0.303227
1751	02_img84.jpg	LaptopClean	937	696	442	174	-28.1285	0.919044	2.42759	Success	0.352023
1752	02_img84.jpg	T1	923	320	432	114	9.97433	0.562326	5.6372	Success	0.308162
1753	02_img85.jpg	SmallMedicine	272	292	260	158	9.67422	0.805898	1.88236	Success	0.322984
1754	02_img85.jpg	LaptopClean	556	680	442	174	81.1572	0.906141	1.9929	Success	0.318975
1755	02_img85.jpg	T1	993	449	432	114	-70.7885	0.770234	7.15918	Success	0.326089
1756	02_img86.jpg	SmallMedicine	911	260	260	158	42.8048	0.805551	13.26	Success	0.309162
1757	02_img86.jpg	LaptopClean	271	496	442	174	-60.0047	0.768624	4.35299	Success	0.347025
1758	02_img86.jpg	T1	740	635	432	114	-43.8731	0.359542	2.91822	Success	0.334998
1759	02_img87.jpg	SmallMedicine	375	672	260	158	15.8242	0.812391	9.03519	Success	0.312021
1760	02_img87.jpg	LaptopClean	520	244	442	174	0.428189	0.825232	6.58239	Success	0.320999
1761	02_img87.jpg	T1	939	576	432	114	-49.6851	0.517768	11.7151	Success	0.307033
1762	02_img88.jpg	SmallMedicine	377	608	260	158	-33.2409	0.919971	4.50719	Success	0.303012
1763	02_img88.jpg	LaptopClean	954	248	442	174	-10.9679	0.810023	3.9065	Success	0.367035
1764	02_img88.jpg	T1	758	673	432	114	-45.1549	0.428611	1.96295	Success	0.317075
1765	02_img89.jpg	SmallMedicine	714	745	260	158	16.0746	0.910193	0.950507	Success	0.319034
1766	02_img89.jpg	LaptopClean	933	302	442	174	-11.9043	0.920008	2.23949	Success	0.334987
1767	02_img89.jpg	T1	392	430	432	114	46.3366	0.753552	1.03975	Success	0.334999
1768	02_img9.jpg	FruitKnife	709	589	440	256	-3.60845	0.338339	49.5943	Fail	0.346853
1769	02_img9.jpg	GreenSoap	359	642	396	274	14.7725	0.897806	4.39323	Success	0.336058
1770	02_img9.jpg	Pepper	654	239	366	156	-81.759	0.969003	0.786052	Success	0.316028
1771	02_img90.jpg	SmallMedicine	677	711	260	158	88.1602	0.958439	2.16359	Success	0.307027
1772	02_img90.jpg	LaptopClean	938	313	442	174	1.04158	0.956559	0.90208	Success	0.323977
1773	02_img90.jpg	T1	340	410	432	114	11.3362	0.644864	10.7003	Success	0.321058
1774	02_img91.jpg	Block	0	0	278	120	0	0	3.95981	Fail	0.29603
1775	02_img91.jpg	Pepper	354	619	366	156	-23.0659	0.858709	5.38169	Success	0.309026
1776	02_img91.jpg	PaperKnife	936	555	532	146	41.1971	0.341354	31.9471	Fail	0.308033
1777	02_img92.jpg	Block	0	0	278	120	0	0	32.3052	Fail	0.292999
1778	02_img92.jpg	Pepper	354	607	366	156	-53.2778	0.841112	2.37711	Success	0.327004
1779	02_img92.jpg	PaperKnife	858	522	532	146	-9.6148	0.937865	1.66617	Success	0.347188
1780	02_img93.jpg	Block	0	0	278	120	0	0	58.0401	Fail	0.300038
1781	02_img93.jpg	Pepper	346	469	366	156	28.1018	0.877107	1.4374	Success	0.314566
1782	02_img93.jpg	PaperKnife	837	632	532	146	-26.2868	0.82795	4.83402	Success	0.326065
1783	02_img94.jpg	Block	0	0	278	120	0	0	18.4847	Fail	0.301996
1784	02_img94.jpg	Pepper	806	642	366	156	-31.9332	0.818396	2.88684	Success	0.321091
1785	02_img94.jpg	PaperKnife	319	477	532	146	21.8206	0.736121	7.89535	Success	0.313021
1786	02_img95.jpg	Block	0	0	278	120	0	0	16.8872	Fail	0.289997
1787	02_img95.jpg	Pepper	806	627	366	156	-13.5136	0.891448	0.274556	Success	0.316072
1788	02_img95.jpg	PaperKnife	264	423	532	146	-40.0187	0.848441	1.53749	Success	0.330042
1789	02_img96.jpg	Block	0	0	278	120	0	0	13.3415	Fail	0.299451
1790	02_img96.jpg	Pepper	684	661	366	156	-39.557	0.806726	1.01544	Success	0.308116
1791	02_img96.jpg	PaperKnife	279	556	532	146	-4.33595	0	8.64085	Fail	0.311561
1792	02_img97.jpg	Block	255	765	278	120	-64.6934	0.29133	33.6335	Fail	0.292
1793	02_img97.jpg	Pepper	400	237	366	156	-56.8772	0.857048	1.51692	Success	0.338002
1794	02_img97.jpg	PaperKnife	922	579	532	146	37.6796	0.77878	4.82649	Success	0.335037
1795	02_img98.jpg	Block	172	344	278	120	-65.7466	0.241831	74.7313	Fail	0.283998
1796	02_img98.jpg	Pepper	1012	192	366	156	-86.3898	0.7937	8.85465	Success	0.319027
1797	02_img98.jpg	PaperKnife	702	530	532	146	-42.8685	0.208455	2.16841	Fail	0.331356
1798	02_img99.jpg	Block	0	0	278	120	0	0	15.0463	Fail	0.287038
1799	02_img99.jpg	Pepper	1004	313	366	156	-80.8677	0.926781	1.8611	Success	0.334657
1800	02_img99.jpg	PaperKnife	441	657	532	146	-29.8945	0.921264	0.507175	Success	0.308024
1801	03_img0.jpg	FruitKnife	197	267	440	256	42.5853	0.715588	21.6228	Success	0.339997
1802	03_img0.jpg	RedMedicine	346	677	324	142	-81.5968	0.822061	0.586857	Success	0.359001
1803	03_img0.jpg	Block	985	231	278	120	-21.0684	0.52487	8.84323	Success	0.394001
1804	03_img0.jpg	LaptopClean	877	633	442	174	-27.6995	0.905023	2.88816	Success	0.507198
1805	03_img1.jpg	Shampoo	387	209	448	170	48.5574	0.868438	2.09286	Success	0.525069
1806	03_img1.jpg	Xisat	821	297	526	144	-32.5228	0.917077	1.81024	Success	0.585999
1807	03_img1.jpg	SmallMedicine	777	627	260	158	-54.6733	0.926772	3.18888	Success	0.630094
1808	03_img1.jpg	Pepper	368	661	366	156	-55.8413	0.944033	0.759383	Success	0.739133
1809	03_img10.jpg	Pepper	434	753	366	156	60.6342	0.761667	9.25824	Success	0.599
1810	03_img10.jpg	RedMedicine	875	678	324	142	88.4581	0.888684	3.68355	Success	0.51407
1811	03_img10.jpg	LaptopClean	881	238	442	174	-25.5279	0.60953	6.10693	Success	0.528995
1812	03_img10.jpg	O2	467	247	438	184	85.4488	0.87603	3.71314	Success	0.543043
1813	03_img100.jpg	Block	945	852	278	120	-41.2651	0.135899	23.6431	Fail	0.463542
1814	03_img100.jpg	FruitKnife	384	220	440	256	-34.8431	0.736598	1.1529	Success	0.48206
1815	03_img100.jpg	SmallMedicine	477	645	260	158	61.6322	0.744288	19.3094	Success	0.472049
1816	03_img100.jpg	PurpleMedicine	955	309	300	146	-3.74632	0.778275	8.23325	Success	0.494981
1817	03_img101.jpg	Block	498	634	278	120	87.3408	0.644012	17.0811	Success	0.408997
1818	03_img101.jpg	FruitKnife	327	308	440	256	51.908	0.89915	2.74905	Success	0.443998
1819	03_img101.jpg	SmallMedicine	864	223	260	158	-85.3003	0.93968	3.3283	Success	0.454
1820	03_img101.jpg	PurpleMedicine	894	653	300	146	-76.0087	0.8608	4.35393	Success	0.497999
1821	03_img102.jpg	Block	0	0	278	120	0	0	62.9295	Fail	0.513005
1822	03_img102.jpg	FruitKnife	770	338	440	256	0.8023	0.568185	28.9971	Success	0.579989
1823	03_img102.jpg	SmallMedicine	443	646	260	158	-77.6815	0.888913	5.32318	Success	0.550004
1824	03_img102.jpg	PurpleMedicine	918	629	300	146	-49.8326	0.601636	11.1611	Success	0.534997
1825	03_img103.jpg	PurpleMedicine	361	218	300	146	38.7184	0.727831	5.62062	Success	0.440984
1826	03_img103.jpg	Pepper	961	385	366	156	-65.7668	0.94006	1.52908	Success	0.40689
1827	03_img103.jpg	SmallMedicine	622	468	260	158	73.8548	0.845586	9.66125	Success	0.363007
1828	03_img103.jpg	Block	0	0	278	120	0	0	43.4979	Fail	0.325059
1829	03_img104.jpg	PurpleMedicine	266	258	300	146	51.8334	0.962734	0.197514	Success	0.362077
1830	03_img104.jpg	Pepper	952	300	366	156	-60.1231	0.873654	1.73905	Success	0.37503
1831	03_img104.jpg	SmallMedicine	388	684	260	158	47.4541	0.764321	15.9287	Success	0.331028
1832	03_img104.jpg	Block	0	0	278	120	0	0	39.7091	Fail	0.319023
1833	03_img105.jpg	PurpleMedicine	848	275	300	146	-15.1422	0.946387	1.32458	Success	0.351019
1834	03_img105.jpg	Pepper	820	711	366	156	-59.8345	0.936956	2.41837	Success	0.395001
1835	03_img105.jpg	SmallMedicine	407	258	260	158	-29.6922	0.853928	5.17281	Success	0.372518
1836	03_img105.jpg	Block	0	0	278	120	0	0	77.6578	Fail	0.347062
1837	03_img106.jpg	PurpleMedicine	399	710	300	146	-59.0003	0.958375	0.107838	Success	0.421994
1838	03_img106.jpg	Pepper	471	288	366	156	56.8711	0.803285	9.10238	Success	0.461003
1839	03_img106.jpg	SmallMedicine	929	283	260	158	57.1628	0.927261	1.27019	Success	0.452
1840	03_img106.jpg	Block	0	0	278	120	0	0	59.8856	Fail	0.391517
1841	03_img107.jpg	FruitKnife	234	636	440	256	21.2923	0.759232	7.42672	Success	0.421041
1842	03_img107.jpg	Pepper	878	728	366	156	-31.4078	0.788359	5.6031	Success	0.412331
1843	03_img107.jpg	PurpleMedicine	323	241	300	146	-28.2159	0.927192	1.08324	Success	0.38303
1844	03_img107.jpg	GreenSoap	862	274	396	274	79.8593	0.834372	7.59749	Success	0.384993
1845	03_img108.jpg	FruitKnife	286	316	440	256	78.8909	0.931527	2.59376	Success	0.360004
1846	03_img108.jpg	Pepper	717	235	366	156	-67.2412	0.847175	7.10898	Success	0.365045
1847	03_img108.jpg	PurpleMedicine	1070	536	300	146	82.8857	0.655547	15.4871	Success	0.34903
1848	03_img108.jpg	GreenSoap	589	710	396	274	45.52	0.915144	4.42784	Success	0.369071
1849	03_img109.jpg	PurpleMedicine	372	650	300	146	77.6013	0.77916	0.503562	Success	0.340006
1850	03_img109.jpg	GreenSoap	895	259	396	274	-2.47375	0.924223	3.87101	Success	0.37203
1851	03_img109.jpg	Block	819	702	278	120	-37.2927	0.914301	0.389138	Success	0.336029
1852	03_img109.jpg	Pepper	317	212	366	156	-16.1267	0.704919	1.59511	Success	0.360062
1853	03_img11.jpg	Pepper	573	242	366	156	-40.1325	0.749622	4.94621	Success	0.437977
1854	03_img11.jpg	RedMedicine	842	610	324	142	-21.4822	0.962351	0.282203	Success	0.464998
1855	03_img11.jpg	LaptopClean	1039	218	442	174	-47.3565	0.920154	0.0350025	Success	0.426
1856	03_img11.jpg	O2	286	595	438	184	-64.6748	0.919573	1.67391	Success	0.432348
1857	03_img110.jpg	PurpleMedicine	780	669	300	146	-36.312	0.960529	0.0521907	Success	0.42699
1858	03_img110.jpg	GreenSoap	951	235	396	274	35.8023	0.921101	0.127182	Success	0.426
1859	03_img110.jpg	Block	0	0	278	120	0	0	17.8236	Fail	0.395001
1860	03_img110.jpg	Pepper	343	264	366	156	16.9155	0.882339	0.0915976	Success	0.460997
1861	03_img111.jpg	PurpleMedicine	1014	269	300	146	39.8422	0.627462	27.2954	Success	0.461018
1862	03_img111.jpg	GreenSoap	718	682	396	274	-76.8413	0.952228	2.69756	Success	0.427005
1863	03_img111.jpg	Block	1012	205	278	120	75.8211	0	47.1536	Fail	0.379999
1864	03_img111.jpg	Pepper	427	230	366	156	-26.8336	0.859025	6.54336	Success	0.407039
1865	03_img112.jpg	Block	0	0	278	120	0	0	38.4294	Fail	0.343994
1866	03_img112.jpg	LaptopClean	602	235	442	174	49.9734	0.872068	3.26886	Success	0.413849
1867	03_img112.jpg	SmallMedicine	217	483	260	158	-36.1843	0.711274	13.3781	Success	0.453002
1868	03_img112.jpg	Pepper	674	716	366	156	-52.9536	0.954813	0.106963	Success	0.485001
1869	03_img113.jpg	FruitKnife	803	757	440	256	31.1336	0.667841	14.0638	Success	0.468001
1870	03_img113.jpg	Glue	1023	352	488	230	-53.6167	0.932472	2.15115	Success	0.645003
1871	03_img113.jpg	SmallMedicine	601	408	260	158	57.9994	0.800211	13.4168	Success	0.831561
1872	03_img113.jpg	PurpleMedicine	232	518	300	146	-57.36	0.899633	4.32254	Success	0.465518
1873	03_img114.jpg	SmallMedicine	788	702	260	158	-51.306	0.959365	0.33087	Success	0.368025
1874	03_img114.jpg	PurpleMedicine	331	612	300	146	54.0262	0.861487	5.93904	Success	0.403068
1875	03_img114.jpg	Block	0	0	278	120	0	0	56.6461	Fail	0.343977
1876	03_img114.jpg	HandClean	923	308	392	214	40.0985	0.94062	2.31361	Success	0.457063
1877	03_img115.jpg	SmallMedicine	396	187	260	158	-24.4341	0.821213	7.84996	Success	0.363
1878	03_img115.jpg	PurpleMedicine	805	307	300	146	40.4425	0.79158	11.7863	Success	0.386003
1879	03_img115.jpg	Block	0	0	278	120	0	0	52.1606	Fail	0.336424
1880	03_img115.jpg	HandClean	900	682	392	214	40.5637	0.901747	3.75236	Success	0.461007
1881	03_img116.jpg	Pepper	745	356	366	156	-69.61	0.854986	6.91158	Success	0.414003
1882	03_img116.jpg	HandClean	1017	644	392	214	63.8183	0.878505	1.63723	Success	0.495526
1883	03_img116.jpg	SmallMedicine	370	182	260	158	-39.7246	0.907564	2.01223	Success	0.381579
1884	03_img116.jpg	PurpleMedicine	375	613	300	146	-58.7244	0.726154	2.57346	Success	0.395344
1885	03_img117.jpg	Pepper	1012	300	366	156	13.2532	0.821664	0.722449	Success	0.401446
1886	03_img117.jpg	HandClean	484	241	392	214	29.9455	0.931249	2.79059	Success	0.467922
1887	03_img117.jpg	SmallMedicine	315	679	260	158	42.0866	0.798805	12.8682	Success	0.369402
1888	03_img117.jpg	PurpleMedicine	744	660	300	146	-77.4988	0.832121	9.24228	Success	0.404994
1889	03_img118.jpg	GreenSoap	997	615	396	274	-41.4573	0.876756	5.49723	Success	0.415613
1890	03_img118.jpg	RedMedicine	499	662	324	142	76.427	0.895926	0.149826	Success	0.398105
1891	03_img118.jpg	HandClean	671	223	392	214	39.0978	0.90285	1.01814	Success	0.544812
1892	03_img118.jpg	Pepper	165	381	366	156	-70.6468	0.714985	3.73693	Success	0.415573
1893	03_img119.jpg	GreenSoap	983	667	396	274	-47.572	0.94536	0.257272	Success	0.452024
1894	03_img119.jpg	RedMedicine	967	230	324	142	2.51822	0.916665	1.50788	Success	0.398034
1895	03_img119.jpg	HandClean	338	261	392	214	60.3775	0.939313	0.255775	Success	0.526065
1896	03_img119.jpg	Pepper	482	715	366	156	72.3531	0.849582	3.72645	Success	0.375025
1897	03_img12.jpg	Pepper	824	640	366	156	60.1973	0.811619	8.62866	Success	0.381034
1898	03_img12.jpg	RedMedicine	578	210	324	142	-61.5164	0.917194	1.36531	Success	0.379079
1899	03_img12.jpg	LaptopClean	965	259	442	174	-62.1285	0.911125	2.90219	Success	0.382139
1900	03_img12.jpg	O2	403	600	438	184	-84.266	0.952126	1.04873	Success	0.392036
1901	03_img120.jpg	Pepper	0	0	366	156	0	0	13.8517	Fail	0.351997
1902	03_img120.jpg	SmallMedicine	0	0	260	158	0	0	15.3386	Fail	0.337035
1903	03_img120.jpg	T1	877	690	432	114	-32.8949	0.646504	3.55823	Success	0.349028
1904	03_img120.jpg	Block	0	0	278	120	0	0	27.2663	Fail	0.320273
1905	03_img121.jpg	Pepper	0	0	366	156	0	0	33.6398	Fail	0.373
1906	03_img121.jpg	SmallMedicine	0	0	260	158	0	0	57.6428	Fail	0.345994
1907	03_img121.jpg	T1	0	0	432	114	0	0	79.0968	Fail	0.330025
1908	03_img121.jpg	Block	0	0	278	120	0	0	56.2331	Fail	0.324569
1909	03_img122.jpg	Pepper	0	0	366	156	0	0	16.6595	Fail	0.337887
1910	03_img122.jpg	SmallMedicine	0	0	260	158	0	0	20.3886	Fail	0.339823
1911	03_img122.jpg	T1	239	268	432	114	3.74868	0.204976	47.1548	Fail	0.341
1912	03_img122.jpg	Block	0	0	278	120	0	0	29.8815	Fail	0.322056
1913	03_img123.jpg	Pepper	0	0	366	156	0	0	14.2333	Fail	0.340502
1914	03_img123.jpg	SmallMedicine	0	0	260	158	0	0	47.408	Fail	0.310732
1915	03_img123.jpg	T1	1281	756	432	114	83.8628	0	82.6021	Fail	0.314873
1916	03_img123.jpg	Block	874	687	278	120	-69.1375	0.560183	5.81514	Success	0.314997
1917	03_img124.jpg	Pepper	451	269	366	156	39.0283	0.956915	0.842088	Success	0.344855
1918	03_img124.jpg	SmallMedicine	902	698	260	158	80.2738	0.86867	7.86188	Success	0.344072
1919	03_img124.jpg	T1	0	0	432	114	0	0	52.5418	Fail	0.349992
1920	03_img124.jpg	Block	0	0	278	120	0	0	65.8802	Fail	0.300029
1921	03_img125.jpg	Pepper	907	651	366	156	-24.6825	0.770765	6.35202	Success	0.364009
1922	03_img125.jpg	SmallMedicine	1000	259	260	158	20.0516	0.901992	2.0445	Success	0.326025
1923	03_img125.jpg	T1	279	576	432	114	48.5141	0.525987	13.9171	Success	0.340024
1924	03_img125.jpg	Block	0	0	278	120	0	0	45.1378	Fail	0.325998
1925	03_img126.jpg	Pepper	319	675	366	156	62.0128	0.854663	0.312945	Success	0.354973
1926	03_img126.jpg	SmallMedicine	424	238	260	158	-42.1961	0.85341	3.23764	Success	0.328019
1927	03_img126.jpg	T1	755	674	432	114	-5.96868	0.18137	59.2527	Fail	0.330999
1928	03_img126.jpg	Block	0	0	278	120	0	0	33.931	Fail	0.310097
1929	03_img127.jpg	Pepper	297	595	366	156	-37.9648	0.934574	1.80687	Success	0.360002
1930	03_img127.jpg	SmallMedicine	443	220	260	158	-80.2283	0.840582	8.62036	Success	0.32391
1931	03_img127.jpg	T1	643	395	432	114	-6.03634	0	48.1679	Fail	0.339024
1932	03_img127.jpg	Block	820	333	278	120	-21.9527	0	5.14279	Fail	0.307984
1933	03_img128.jpg	Yogurt	816	685	478	196	-37.8816	0.961689	1.16508	Success	0.360904
1934	03_img128.jpg	Block	0	0	278	120	0	0	31.0117	Fail	0.318256
1935	03_img128.jpg	PurpleMedicine	250	700	300	146	33.772	0.669944	14.9543	Success	0.372784
1936	03_img128.jpg	HandClean	334	249	392	214	-20.4512	0.877499	2.3092	Success	0.450069
1937	03_img129.jpg	Yogurt	291	559	478	196	88.903	0.933103	2.80645	Success	0.371028
1938	03_img129.jpg	Block	0	0	278	120	0	0	74.8647	Fail	0.319023
1939	03_img129.jpg	PurpleMedicine	918	667	300	146	-69.1939	0.778654	9.26284	Success	0.359063
1940	03_img129.jpg	HandClean	1060	278	392	214	32.7787	0.958722	1.48762	Success	0.429997
1941	03_img13.jpg	Pepper	843	586	366	156	-29.2282	0.92392	1.10269	Success	0.366012
1942	03_img13.jpg	RedMedicine	402	593	324	142	-77.9272	0.993651	0.0706231	Success	0.393017
1943	03_img13.jpg	LaptopClean	988	195	442	174	-29.5889	0.795093	0.33036	Success	0.363984
1944	03_img13.jpg	O2	642	194	438	184	-45.6513	0.853029	1.70707	Success	0.396051
1945	03_img130.jpg	CokeBottle	0	0	576	202	0	0	89.9228	Fail	0.346027
1946	03_img130.jpg	SmallMedicine	722	777	260	158	42.0149	0.848791	7.49087	Success	0.353001
1947	03_img130.jpg	HandClean	248	236	392	214	-0.946382	0.840027	9.07723	Success	0.445026
1948	03_img130.jpg	PurpleMedicine	349	637	300	146	-86.3017	0.707981	10.9806	Success	0.359036
1949	03_img131.jpg	MilkBottle	0	0	532	238	0	0	37.6179	Fail	0.320024
1950	03_img131.jpg	Block	954	744	278	120	79.4395	0	69.7165	Fail	0.298031
1951	03_img131.jpg	SmallMedicine	1030	633	260	158	-68.5422	0.8884	4.41444	Success	0.341026
1952	03_img131.jpg	RedMedicine	185	282	324	142	-53.7828	0.810756	0.435292	Success	0.351548
1953	03_img132.jpg	MilkBottle	0	0	532	238	0	0	35.645	Fail	0.345543
1954	03_img132.jpg	Block	0	0	278	120	0	0	59.5116	Fail	0.327971
1955	03_img132.jpg	SmallMedicine	193	702	260	158	71.8819	0.850057	7.97435	Success	0.333951
1956	03_img132.jpg	RedMedicine	443	218	324	142	42.6377	0.952877	0.390828	Success	0.360549
1957	03_img133.jpg	HandClean	1071	333	392	214	51.7166	0.940637	0.876482	Success	0.552948
1958	03_img133.jpg	ABBottle	260	556	474	186	-67.7469	0.849568	5.63728	Success	0.523072
1959	03_img133.jpg	SmallMedicine	800	706	260	158	-39.2734	0.907067	4.93882	Success	0.394555
1960	03_img133.jpg	Pepper	644	213	366	156	-87.7566	0.751537	13.3158	Success	0.456647
1961	03_img134.jpg	HandClean	635	246	392	214	58.2197	0.895933	1.62293	Success	0.492815
1962	03_img134.jpg	ABBottle	554	656	474	186	1.51464	0.864626	1.36485	Success	0.425018
1963	03_img134.jpg	SmallMedicine	991	370	260	158	-86.1569	0.894335	1.31721	Success	0.407505
1964	03_img134.jpg	Pepper	254	272	366	156	-82.81	0.849267	0.947645	Success	0.398561
1965	03_img135.jpg	HandClean	904	221	392	214	51.2518	0.935194	1.79504	Success	0.448027
1966	03_img135.jpg	ABBottle	422	222	474	186	-46.907	0.763886	3.44716	Success	0.390303
1967	03_img135.jpg	SmallMedicine	513	699	260	158	76.369	0.779323	15.7968	Success	0.36606
1968	03_img135.jpg	Pepper	960	722	366	156	-63.3233	0.796969	5.72053	Success	0.394589
1969	03_img136.jpg	Block	0	0	278	120	0	0	4.71779	Fail	0.308007
1970	03_img136.jpg	Shampoo	886	238	448	170	14.0798	0.908405	0.810231	Success	0.327023
1971	03_img136.jpg	PurpleMedicine	253	632	300	146	4.48841	0.780618	12.2826	Success	0.321031
1972	03_img136.jpg	GreenSoap	808	732	396	274	-64.4819	0.869572	3.03618	Success	0.343998
1973	03_img137.jpg	Block	0	0	278	120	0	0	76.5279	Fail	0.300997
1974	03_img137.jpg	Shampoo	280	325	448	170	16.8532	0.906227	2.377	Success	0.350029
1975	03_img137.jpg	PurpleMedicine	856	682	300	146	-22.084	0.946752	1.76309	Success	0.307583
1976	03_img137.jpg	GreenSoap	970	294	396	274	84.3902	0.907191	2.74975	Success	0.346013
1977	03_img138.jpg	Block	0	0	278	120	0	0	50.151	Fail	0.307916
1978	03_img138.jpg	Shampoo	990	506	448	170	63.3149	0.946749	0.688613	Success	0.368087
1979	03_img138.jpg	PurpleMedicine	601	244	300	146	-34.2217	0.898551	2.30523	Success	0.346889
1980	03_img138.jpg	GreenSoap	217	486	396	274	-59.4796	0.878525	0.526748	Success	0.371841
1981	03_img139.jpg	FruitKnife	877	650	440	256	-64.6842	0.840182	1.37739	Success	0.385616
1982	03_img139.jpg	LaptopClean	956	205	442	174	4.66168	0.856879	2.19432	Success	0.397604
1983	03_img139.jpg	PurpleMedicine	281	716	300	146	48.0846	0.874675	4.85423	Success	0.387128
1984	03_img139.jpg	Pepper	314	218	366	156	-18.9081	0.882725	3.23476	Success	0.39362
1985	03_img14.jpg	FruitKnife	687	671	440	256	12.5137	0.620467	27.7743	Success	0.4076
1986	03_img14.jpg	RedMedicine	1030	345	324	142	-65.668	0.898879	1.60088	Success	0.401548
1987	03_img14.jpg	Block	132	512	278	120	0.926482	0.509328	26.272	Success	0.324614
1988	03_img14.jpg	LaptopClean	486	327	442	174	-89.0133	0.711278	5.10513	Success	0.412684
1989	03_img140.jpg	FruitKnife	289	268	440	256	5.5509	0.809402	7.21962	Success	0.366521
1990	03_img140.jpg	LaptopClean	286	672	442	174	-22.4561	0.805156	1.79024	Success	0.377
1991	03_img140.jpg	PurpleMedicine	893	290	300	146	-89.2526	0.488866	32.8431	Fail	0.382998
1992	03_img140.jpg	Pepper	866	661	366	156	-40.9475	0.912305	1.47575	Success	0.364838
1993	03_img141.jpg	FruitKnife	301	670	440	256	-65.0494	0.895391	5.74524	Success	0.362027
1994	03_img141.jpg	LaptopClean	924	712	442	174	16.5876	0.9459	0.816683	Success	0.374038
1995	03_img141.jpg	PurpleMedicine	415	261	300	146	-11.4235	0.794758	9.56782	Success	0.368002
1996	03_img141.jpg	Pepper	828	283	366	156	81.7356	0.820682	8.8993	Success	0.359033
1997	03_img142.jpg	FruitKnife	391	260	440	256	-8.02846	0.863033	7.23433	Success	0.343997
1998	03_img142.jpg	LaptopClean	405	630	442	174	68.8767	0.588135	22.6484	Success	0.44352
[truncated: 405 more rows]
