# Supplementary material for: Robot Arm Grasping Using Learning-Based Template Matching and Self-Rotation Learning Network
Source: Research Square preprint supplement (doi:10.21203/rs.3.rs-1402918/v1), 2022-03-08
Supplement: Supplementary file 5 [file fcb22cefb2e3209fa39c8843.xlsx]

## Sheet: Rot_Grasp_SIFT_04
The Practical Grasping of The SIFT Method on Rotation Dataset - 4 Objects
No.	Search_Name	Template	CenterX	CenterY	Width	Height	Angle	Timing	Grasp Result
1	Img_15-08-2021 20-41-35	Pepper	940	468	366	156	-40.4271	1.08663	success
2	Img_15-08-2021 20-41-48	GreenGlue	0	0	0	0	0	0	fail
3	Img_15-08-2021 20-41-49	PurpleMedicine	304	625	300	146	63.0223	1.03729	success
4	Img_15-08-2021 20-42-02	Xisat	768	696	526	144	-62.0124	0.992461	success
5	Img_15-08-2021 20-42-22	Pepper	654	295	366	156	-57.6005	1.05563	success
6	Img_15-08-2021 20-42-35	GreenGlue	490	778	509	127	-57.7751	0.942977	success
7	Img_15-08-2021 20-42-47	PurpleMedicine	907	710	300	146	-67.7077	0.980512	success
8	Img_15-08-2021 20-43-00	Xisat	244	349	526	144	-63.8638	0.903061	success
9	Img_15-08-2021 20-43-17	Pepper	324	220	366	156	-8.85465	1.01897	success
10	Img_15-08-2021 20-43-31	GreenGlue	0	0	0	0	0	0	fail
11	Img_15-08-2021 20-43-32	PurpleMedicine	824	726	300	146	-47.8385	0.973885	success
12	Img_15-08-2021 20-43-44	Xisat	843	344	526	144	-47.1187	0.945079	success
13	Img_15-08-2021 20-44-06	Pepper	322	657	366	156	39.4856	1.09407	success
14	Img_15-08-2021 20-44-19	GreenGlue	0	0	0	0	0	0	fail
15	Img_15-08-2021 20-44-20	PurpleMedicine	290	318	300	146	47.6929	0.993048	success
16	Img_15-08-2021 20-44-33	Xisat	882	318	526	144	-56.4336	0.93913	success
17	Img_15-08-2021 20-44-52	Pepper	704	695	366	156	54.0528	1.05276	success
18	Img_15-08-2021 20-45-05	GreenGlue	0	0	0	0	0	0	fail
19	Img_15-08-2021 20-45-06	PurpleMedicine	408	202	300	146	-23.3261	1.00803	success
20	Img_15-08-2021 20-45-18	Xisat	297	729	526	144	-71.7598	0.974339	success
21	Img_15-08-2021 20-46-00	ABBottle	444	758	474	186	-89.7981	1.03298	success
22	Img_15-08-2021 20-46-12	FruitKnife	820	683	431	252	-57.3474	0.976677	success
23	Img_15-08-2021 20-46-25	LaptopClean	966	304	442	174	-25.5846	0.95181	success
24	Img_15-08-2021 20-46-38	RedMedicine	334	229	324	142	-0.0258763	0.958535	success
25	Img_15-08-2021 20-46-55	ABBottle	338	263	474	186	-33.9306	1.03557	success
26	Img_15-08-2021 20-47-08	FruitKnife	332	669	431	252	-19.8849	0.981532	success
27	Img_15-08-2021 20-47-21	LaptopClean	948	776	442	174	-62.5018	1.05018	success
28	Img_15-08-2021 20-47-34	RedMedicine	886	247	324	142	-84.0173	1.00549	success
29	Img_15-08-2021 20-47-49	ABBottle	338	728	474	186	37.0581	1.04774	success
30	Img_15-08-2021 20-48-02	FruitKnife	348	283	431	252	-32.4935	0.964599	success
31	Img_15-08-2021 20-48-14	LaptopClean	883	329	442	174	-56.3506	1.02174	success
32	Img_15-08-2021 20-48-27	RedMedicine	939	737	324	142	-52.4104	0.964685	success
33	Img_15-08-2021 20-48-51	ABBottle	846	605	474	186	-40.5945	1.09444	success
34	Img_15-08-2021 20-49-04	FruitKnife	896	238	431	252	-6.88412	0.962457	success
35	Img_15-08-2021 20-49-16	LaptopClean	464	384	442	174	40.6664	0.981141	success
36	Img_15-08-2021 20-49-29	RedMedicine	550	679	324	142	-72.9803	0.931059	success
37	Img_15-08-2021 20-49-47	ABBottle	463	261	474	186	24.1456	1.05175	success
38	Img_15-08-2021 20-50-00	FruitKnife	357	741	431	252	51.7717	1.00447	success
39	Img_15-08-2021 20-50-12	LaptopClean	663	601	442	174	-66.2138	0.997635	success
40	Img_15-08-2021 20-50-24	RedMedicine	938	420	324	142	-85.2248	0.898167	success
41	Img_15-08-2021 20-52-16	Glue	403	225	488	230	16.2578	1.03355	success
42	Img_15-08-2021 20-52-29	CokeBottle	0	0	0	0	0	0	fail
43	Img_15-08-2021 20-52-42	Softwash	0	0	0	0	0	0	fail
44	Img_15-08-2021 20-52-52	Glue	621	695	488	230	-62.6008	0.995324	success
45	Img_15-08-2021 20-53-04	CokeBottle	0	0	0	0	0	0	fail
46	Img_15-08-2021 20-53-06	Softwash	394	253	376	258	8.94271	0.940841	success
47	Img_15-08-2021 20-53-29	Glue	925	766	488	230	-32.958	1.11092	success
48	Img_15-08-2021 20-53-42	CokeBottle	0	0	0	0	0	0	fail
49	Img_15-08-2021 20-53-44	Softwash	0	0	0	0	0	0	fail
50	Img_15-08-2021 20-53-52	Glue	701	418	488	230	20.6914	1.09276	success
51	Img_15-08-2021 20-54-04	CokeBottle	0	0	0	0	0	0	fail
52	Img_15-08-2021 20-54-06	Softwash	0	0	0	0	0	0	fail
53	Img_15-08-2021 20-54-15	Glue	418	511	488	230	68.9463	1.04663	success
54	Img_15-08-2021 20-54-27	CokeBottle	0	0	0	0	0	0	fail
55	Img_15-08-2021 20-54-29	Softwash	784	735	376	258	-31.3985	0.926826	success
56	Img_15-08-2021 21-00-29	GreenSoap	740	722	396	274	-18.4914	1.09071	success
57	Img_15-08-2021 21-00-41	Block	0	0	0	0	0	0	fail
58	Img_15-08-2021 21-00-42	Shampoo	304	590	448	170	51.2753	1.0611	success
59	Img_15-08-2021 21-00-55	Yogurt	778	268	478	196	51.8235	0.997674	success
60	Img_15-08-2021 21-01-17	GreenSoap	232	290	396	274	37.9473	1.01964	success
61	Img_15-08-2021 21-01-31	Block	976	718	302	125	-36.3517	0.975881	success
62	Img_15-08-2021 21-01-44	Shampoo	386	618	448	170	58.1411	1.001	success
63	Img_15-08-2021 21-01-57	Yogurt	788	310	478	196	-60.3262	1.03884	success
64	Img_15-08-2021 21-02-14	GreenSoap	944	709	396	274	-39.7882	1.0683	success
65	Img_15-08-2021 21-02-27	Block	845	656	302	125	-40.5643	0.902265	success
66	Img_15-08-2021 21-02-28	Shampoo	729	210	448	170	47.1134	1.03024	success
67	Img_15-08-2021 21-02-41	Yogurt	245	709	478	196	-32.0305	1.01207	success
68	Img_15-08-2021 21-02-59	GreenSoap	697	726	396	274	-39.4436	1.03517	success
69	Img_15-08-2021 21-03-11	Block	740	639	302	125	-40.8499	0.939496	success
70	Img_15-08-2021 21-03-12	Shampoo	910	328	448	170	41.9347	1.02733	success
71	Img_15-08-2021 21-03-25	Yogurt	379	277	478	196	-68.1683	1.00738	success
72	Img_15-08-2021 21-03-42	GreenSoap	844	579	396	274	-66.4074	0.985921	success
73	Img_15-08-2021 21-03-55	Block	0	0	0	0	0	0	fail
74	Img_15-08-2021 21-03-56	Shampoo	520	644	448	170	-88.8448	1.02975	success
75	Img_15-08-2021 21-04-08	Yogurt	190	346	478	196	-83.6069	0.981602	success
76	Img_15-08-2021 21-04-43	MilkBottle	0	0	0	0	0	0	fail
77	Img_15-08-2021 21-04-44	DrillCover	0	0	0	0	0	0	fail
78	Img_15-08-2021 21-04-45	PaperKnife	266	689	550	153	-3.27124	0.997893	success
79	Img_15-08-2021 21-05-25	MilkBottle	0	0	0	0	0	0	fail
80	Img_15-08-2021 21-05-26	DrillCover	275	754	463	141	14.4661	0.983712	success
81	Img_15-08-2021 21-05-38	PaperKnife	288	288	550	153	-36.2296	0.973823	success
82	Img_15-08-2021 21-06-02	MilkBottle	0	0	0	0	0	0	fail
83	Img_15-08-2021 21-06-03	DrillCover	1194	597	463	141	-15.7326	0.993164	success
84	Img_15-08-2021 21-06-17	PaperKnife	974	728	550	153	-31.6262	0.996285	success
85	Img_15-08-2021 21-06-40	MilkBottle	0	0	0	0	0	0	fail
86	Img_15-08-2021 21-06-41	DrillCover	1008	752	463	141	13.1406	0.931115	success
87	Img_15-08-2021 21-06-54	PaperKnife	303	653	550	153	31.3703	0.963588	success
88	Img_15-08-2021 21-07-15	MilkBottle	0	0	0	0	0	0	fail
89	Img_15-08-2021 21-07-16	DrillCover	772	632	463	141	43.4208	1.01382	success
90	Img_15-08-2021 21-07-28	PaperKnife	195	705	550	153	-42.1617	0.996024	success
91	Img_15-08-2021 21-55-40	T1	0	0	0	0	0	0	fail
92	Img_15-08-2021 20-55-43	O2	710	311	438	184	10.0175	1.09967	success
93	Img_15-08-2021 20-55-55	SmallMedicine	333	377	260	158	-38.928	0.974	success
94	Img_15-08-2021 20-56-09	HandClean	423	732	392	214	1.16116	1.11319	success
95	Img_15-08-2021 21-56-25	T1	0	0	0	0	0	0	fail
96	Img_15-08-2021 20-56-29	O2	345	723	438	184	-51.7624	1.09193	success
97	Img_15-08-2021 20-56-42	SmallMedicine	395	313	260	158	79.7578	1.04649	success
98	Img_15-08-2021 20-56-56	HandClean	910	372	392	214	50.8091	1.07265	success
99	Img_15-08-2021 21-57-10	T1	0	0	0	0	0	0	fail
100	Img_15-08-2021 20-57-16	O2	779	298	438	184	66.9834	1.08377	success
101	Img_15-08-2021 20-57-28	SmallMedicine	973	702	260	158	-64.888	1.04112	success
102	Img_15-08-2021 20-57-43	HandClean	369	257	392	214	-53.2047	1.11966	success
103	Img_15-08-2021 20-57-55	T1	0	0	0	0	0	0	fail
104	Img_15-08-2021 20-58-02	O2	680	705	438	184	-51.9071	1.01665	success
105	Img_15-08-2021 20-58-15	SmallMedicine	293	698	260	158	-88.5862	0.948296	success
106	Img_15-08-2021 20-58-28	HandClean	800	366	392	214	-9.59007	1.06746	success
107	Img_15-08-2021 20-59-48	T1	0	0	0	0	0	0	fail
108	Img_15-08-2021 20-58-50	O2	680	705	438	184	-51.9071	1.01665	success
109	Img_15-08-2021 20-59-05	SmallMedicine	235	554	260	158	-51.7179	0.980459	success
110	Img_15-08-2021 20-59-12	HandClean	619	646	392	214	-26.0197	1.11902	success
Average Timing								0.780929	85
"Success" Grasping Percentage									0.772727
